# Supplementary material for: Genome-Wide Gene Expression in relation to Age in Large Laboratory Cohorts of Drosophila melanogaster
Source: Genet Res Int. 2015 May 21;2015:835624. doi: 10.1155/2015/835624 (PMC4454753; doi:10.1155/2015/835624)
Supplement: Supplementary file 1 — The supplemental tables 1, 2, and 3, are the data used for analysis in this study. Supplemental table 1 presents the data used for the SOM clustering analysis. Supplemental table 2 presents the data used to perform the GSEA for the significantly up-regulated genes, whereas the significantly down-regulated genes are presented in supplemental table 3. [file 835624.f1.xlsx]

## Sheet: Supplemental Table 1
SOM Class	FBGN	NAME	SYMBOL	Day9.Day2_FoldChange	Day9.Day2_P.Value	Day9.Day2_adj.P.Val	Day9.Day2_Flag	Day16_FoldChange	Day16_P.Value	Day16_adj.P.Val	Day16_Flag	Day23_FoldChange	Day23_P.Value	Day23_adj.P.Val	Day23_Flag	Day30_FoldChange	Day30_P.Value	Day30_adj.P.Val	Day30_Flag	Day37_FoldChange	Day37_P.Value	Day37_adj.P.Val	Day37_Flag	Day44_FoldChange	Day44_P.Value	Day44_adj.P.Val	Day44_Flag	Day51_FoldChange	Day51_P.Value	Day51_adj.P.Val	Day51_Flag	Day58_FoldChange	Day58_P.Value	Day58_adj.P.Val	Day58_Flag	Day65_FoldChange	Day65_P.Value	Day65_adj.P.Val	Day65_Flag	Day72_FoldChange	Day72_P.Value	Day72_adj.P.Val	Day72_Flag	Day79_FoldChange	Day79_P.Value	Day79_adj.P.Val	Day79_Flag	SOM Class
0	FBgn0038181	CG9297	CG9297	-1.59	0	0.00038	1	-2.21	0	0	1	-2.6	0	0	1	-2.98	0	0	1	-2.85	0	0	1	-3.49	0	0	1	-3.33	0	0	1	-3.56	0	0	1	-3.67	0	0	1	-3.54	0	0	1	-3.8	0	0	1	0
0	FBgn0040074	retinin	retinin	-2.16	7e-06	0.028564	1	-3.01	0	5e-06	1	-4.3	0	0	1	-5.4	0	0	1	-5.18	0	0	1	-5.05	0	0	1	-4.25	0	0	1	-5.28	0	0	1	-6.67	0	0	1	-7.02	0	0	1	-6.45	0	0	1	0
0	FBgn0035817	CG7409	CG7409	-1.75	0.003053	0.624502	0	-2.5	5e-06	0.002749	1	-2.87	0	8.8e-05	1	-3.02	0	2e-05	1	-3.21	0	4e-06	1	-3.01	0	8e-06	1	-2.77	1e-06	3.8e-05	1	-2.93	0	1.2e-05	1	-3.12	0	3e-06	1	-3.56	0	0	1	-2.91	0	1.1e-05	1	0
0	FBgn0002565	Larval serum protein 2	Lsp2	-1.23	0.21713	0.999395	0	-2.51	1e-06	0.000748	1	-2.77	0	3.1e-05	1	-2.37	2e-06	0.000256	1	-2.81	0	6e-06	1	-2.34	3e-06	0.00014	1	-2.25	7e-06	0.000323	1	-3.1	0	1e-06	1	-3.45	0	0	1	-3.67	0	0	1	-3.55	0	0	1	0
0	FBgn0042201	Neuropeptide-like precursor 3	Nplp3	-1.91	0.00058	0.387218	0	-2.25	2.7e-05	0.01058	1	-2.96	0	3.9e-05	1	-3.54	0	1e-06	1	-3.73	0	0	1	-3.92	0	0	1	-4.18	0	0	1	-4.17	0	0	1	-5.08	0	0	1	-4.79	0	0	1	-4.67	0	0	1	0
0	FBgn0030829	CG12998	CG12998	-2.24	0.000619	0.387218	0	-2.53	0.000107	0.030326	1	-3.56	3e-06	0.000505	1	-4.11	0	1.1e-05	1	-3.4	6e-06	0.000344	1	-4.52	0	7e-06	1	-3.47	1e-06	4.7e-05	1	-3.71	2e-06	7.7e-05	1	-4.51	0	6e-06	1	-4.93	0	1e-06	1	-4.75	0	0	1	0
1	FBgn0003149	Paramyosin	Prm	-1.19	0.049804	0.999395	0	-1.91	0	2e-06	1	-2	0	0	1	-1.95	0	0	1	-1.97	0	0	1	-2.19	0	0	1	-2.14	0	0	1	-2.23	0	0	1	-2.06	0	0	1	-1.96	0	0	1	-1.98	0	0	1	1
1	FBgn0004435	G protein alpha49B	Galpha49B	-1.18	0.058751	0.999395	0	-1.61	1e-06	0.000748	1	-1.94	0	0	1	-1.76	0	4e-06	1	-1.86	0	0	1	-1.66	0	1.5e-05	1	-1.58	1e-05	0.000431	1	-1.65	0	1.9e-05	1	-2.23	0	0	1	-2.45	0	0	1	-2.06	0	0	1	1
1	FBgn0002741	Myosin Heavy Chain	Mhc	-1.19	0.063303	0.999395	0	-1.73	0	0.000306	1	-1.72	0	6.8e-05	1	-1.67	1e-06	0.000112	1	-1.69	0	4.3e-05	1	-2.38	0	0	1	-2.31	0	0	1	-2.1	0	0	1	-2.16	0	0	1	-2.01	0	0	1	-2.15	0	0	1	1
1	FBgn0014863	Muscle LIM protein at 84B	Mlp84B	-1.26	0.001061	0.472058	0	-1.74	0	0	1	-1.81	0	0	1	-1.95	0	0	1	-1.84	0	0	1	-2.06	0	0	1	-2.09	0	0	1	-2.09	0	0	1	-2.19	0	0	1	-2.09	0	0	1	-2.2	0	0	1	1
1	FBgn0053519	Unc-89	Unc-89	-1.14	0.181393	0.999395	0	-1.51	4.3e-05	0.016246	1	-1.58	9e-06	0.001146	1	-1.58	8e-06	0.000683	1	-1.75	0	1.9e-05	1	-2.11	0	0	1	-2.17	0	0	1	-2.19	0	0	1	-2.3	0	0	1	-2.19	0	0	1	-2.37	0	0	1	1
1	FBgn0011693	Photoreceptor dehydrogenase	Pdh	-1.07	0.584593	0.999395	0	-1.68	7.3e-05	0.023409	1	-1.84	6e-06	0.000805	1	-2.42	0	0	1	-2.29	0	1e-06	1	-1.72	4.2e-05	0.001328	1	-1.97	1e-06	4.6e-05	1	-2.29	0	1e-06	1	-2.66	0	0	1	-2.45	0	0	1	-2.85	0	0	1	1
1	FBgn0000045	Actin 79B	Act79B	-1.39	0.000134	0.195811	0	-2.02	0	0	1	-2.13	0	0	1	-2.42	0	0	1	-2.34	0	0	1	-2.73	0	0	1	-2.58	0	0	1	-2.75	0	0	1	-2.93	0	0	1	-2.88	0	0	1	-2.85	0	0	1	1
3	FBgn0039897	CG1674	CG1674	-1.26	0.00392	0.670117	0	-1.51	1e-06	0.001074	1	-1.58	0	4.8e-05	1	-1.56	0	5.1e-05	1	-1.57	0	1.8e-05	1	-1.69	0	1e-06	1	-1.57	0	1.5e-05	1	-1.6	0	5e-06	1	-1.51	1e-06	5.8e-05	1	-1.62	0	2e-06	1	-1.5	2e-06	6.3e-05	1	3
3	FBgn0032946	nervana 3	nrv3	-1.28	0.010048	0.822654	0	-1.69	0	0.000528	1	-1.56	9e-06	0.001151	1	-1.68	3e-06	0.000309	1	-1.73	0	1.7e-05	1	-1.52	3.1e-05	0.001026	1	-1.67	1e-06	4.5e-05	1	-1.83	0	1e-06	1	-1.92	0	0	1	-1.86	0	1e-06	1	-1.62	2e-06	7.8e-05	1	3
3	FBgn0037910	CG14708	CG14708	-1.21	0.063404	0.999395	0	-1.56	5.6e-05	0.018768	1	-1.53	0.0001	0.007256	1	-1.67	4e-06	0.000415	1	-1.65	8e-06	0.000442	1	-1.71	2e-06	0.00011	1	-1.61	1.7e-05	0.000656	1	-1.92	0	3e-06	1	-1.78	0	2.2e-05	1	-1.97	0	1e-06	1	-1.69	3e-06	0.000115	1	3
3	FBgn0031942	CG7203	CG7203	-1.37	0.004588	0.670117	0	-1.6	5.1e-05	0.01804	1	-1.96	0	2.7e-05	1	-1.7	7e-06	0.000601	1	-1.71	5e-06	0.000317	1	-1.83	1e-06	3.4e-05	1	-1.69	9e-06	0.000374	1	-1.86	0	1.9e-05	1	-1.8	1e-06	4.5e-05	1	-1.69	8e-06	0.000233	1	-1.75	1.4e-05	0.000403	1	3
3	FBgn0005666	bent	bt	-1.33	0.002193	0.588287	0	-1.62	2e-06	0.001222	1	-1.71	0	5.7e-05	1	-1.85	0	2e-06	1	-1.67	0	3.7e-05	1	-1.97	0	0	1	-1.8	0	2e-06	1	-1.94	0	0	1	-1.76	0	3e-06	1	-1.72	0	6e-06	1	-1.9	0	0	1	3
3	FBgn0038294	Myofilin	Mf	-1.18	0.084362	0.999395	0	-1.61	3e-06	0.002122	1	-1.63	2e-06	0.0004	1	-1.67	1e-06	0.000114	1	-1.68	1e-06	5.4e-05	1	-1.95	0	0	1	-2.13	0	0	1	-2.13	0	0	1	-2.14	0	0	1	-2.25	0	0	1	-2.11	0	0	1	3
5	FBgn0033593	CG9080	CG9080	1.29	0.109336	0.999395	0	1.97	5.8e-05	0.01908	1	2.29	2e-06	0.00036	1	1.82	0.000324	0.01265	1	2.43	0	4.1e-05	1	3.95	0	0	1	3.69	0	0	1	3.45	0	0	1	2.55	0	8e-06	1	1.84	0.000245	0.004113	1	3.38	0	0	1	5
5	FBgn0031489	CG17224	CG17224	1.24	0.070349	0.999395	0	1.63	0.00011	0.030326	1	2.57	0	0	1	2.44	0	0	1	2.1	0	6e-06	1	3.43	0	0	1	2.82	0	0	1	2.59	0	0	1	1.88	1e-06	5.6e-05	1	2.14	0	1e-06	1	2.18	0	6e-06	1	5
8	FBgn0014865	Metchnikowin	Mtk	1.04	0.887154	0.999395	0	4.8	3e-06	0.002109	1	9.96	0	0	1	6.59	0	1.3e-05	1	10.03	0	0	1	13.12	0	0	1	13.26	0	0	1	13.76	0	0	1	12.57	0	0	1	9.03	0	0	1	12.19	0	0	1	8
8	FBgn0037038	CG11037	CG11037	-1.98	0.040232	0.999395	0	2.89	9.1e-05	0.028336	1	2.69	0.000284	0.015974	1	6.21	0	0	1	9.21	0	0	1	7.03	0	0	1	7.48	0	0	1	9.96	0	0	1	9.57	0	0	1	6.48	0	0	1	7.61	0	0	1	8
8	FBgn0037562	CG11671	CG11671	1.1	0.680914	0.999395	0	3.58	1e-06	0.000879	1	6.24	0	0	1	7.03	0	0	1	8.08	0	0	1	10.26	0	0	1	8.94	0	0	1	9.26	0	0	1	6.43	0	0	1	5.29	0	0	1	7.25	0	0	1	8
8	FBgn0052368	CG32368	CG32368	-1.27	0.338704	0.999395	0	5.74	0	7e-06	1	10.91	0	0	1	8.62	0	0	1	8.65	0	0	1	12.27	0	0	1	10.45	0	0	1	10.34	0	0	1	7.25	0	0	1	5.63	0	0	1	6.77	0	0	1	8
8	FBgn0052279	drosomycin-2	dro2	-1.09	0.714563	0.999395	0	3.82	0	0.000321	1	4.02	0	3.9e-05	1	5.25	0	0	1	5.01	0	0	1	7.33	0	0	1	7.99	0	0	1	8.17	0	0	1	7.01	0	0	1	4.71	0	0	1	5.45	0	0	1	8
8	FBgn0034741	CG4269	CG4269	1.03	0.877649	0.999395	0	2.9	4e-06	0.002122	1	3.18	1e-06	0.000172	1	2.58	2.6e-05	0.001759	1	3.34	0	2.7e-05	1	4.99	0	0	1	4.42	0	0	1	3.98	0	1e-06	1	4.75	0	0	1	2.44	0.000233	0.003989	1	4.28	0	0	1	8
8	FBgn0051410	Niemann-Pick type C-2e	Npc2e	1.03	0.869406	0.999395	0	2.25	1.6e-05	0.006853	1	2.35	6e-06	0.000842	1	2.57	1e-06	0.00012	1	3.43	0	0	1	5.54	0	0	1	4.96	0	0	1	4.41	0	0	1	4.24	0	0	1	2.78	0	8e-06	1	3.96	0	0	1	8
8	FBgn0036068	CG6640	CG6640	1.15	0.376268	0.999395	0	2.4	1e-06	0.000748	1	3.09	0	1e-06	1	4.14	0	0	1	3.79	0	0	1	5.09	0	0	1	4.43	0	0	1	4.19	0	0	1	2.94	0	0	1	2.85	0	1e-06	1	3.91	0	0	1	8
8	FBgn0032002	CG8353	CG8353	-1.07	0.651079	0.999395	0	2.03	1.6e-05	0.006853	1	2.82	0	3e-06	1	3.48	0	0	1	3.13	0	0	1	4.32	0	0	1	3.71	0	0	1	3.67	0	0	1	2.84	0	0	1	2.19	2e-06	7.9e-05	1	3.11	0	0	1	8
0	FBgn0038484	CG5246	CG5246	-1.18	0.295821	0.999395	0	-1.26	0.14164	0.946789	0	-3.01	0	2e-06	1	-4.7	0	0	1	-4.54	0	0	1	-4.05	0	0	1	-3.46	0	0	1	-3.83	0	0	1	-3.43	0	0	1	-3.64	0	0	1	-2.66	0	3e-06	1	0
0	FBgn0038820	CG4000	CG4000	-1.17	0.374752	0.999395	0	-1.54	0.014509	0.480419	0	-2.12	5.1e-05	0.004191	1	-2.67	0	6.3e-05	1	-2.83	0	1.3e-05	1	-2.85	0	7e-06	1	-2.56	1e-06	5.4e-05	1	-2.98	0	3e-06	1	-4.09	0	0	1	-4.62	0	0	1	-3.53	0	0	1	0
0	FBgn0053173	CG33173	CG33173	1.26	0.277853	0.999395	0	-1.48	0.067498	0.847426	0	-3.01	2e-06	0.0004	1	-4.03	0	3e-06	1	-7.44	0	0	1	-4.46	0	0	1	-4.11	0	1e-06	1	-5.28	0	0	1	-5.37	0	0	1	-4.32	0	0	1	-4.76	0	0	1	0
0	FBgn0003357	Jonah 99Ciii	Jon99Ciii	1.33	0.026854	0.964922	0	-1	0.97557	0.998221	0	-1.72	5.5e-05	0.004463	1	-2.68	0	0	1	-3.44	0	0	1	-4.1	0	0	1	-4.97	0	0	1	-4.32	0	0	1	-5.47	0	0	1	-5.19	0	0	1	-5.66	0	0	1	0
0	FBgn0033774	CG12374	CG12374	1.43	0.040113	0.999395	0	-1.22	0.25719	0.964139	0	-2.26	1.2e-05	0.001354	1	-4.74	0	0	1	-5.81	0	0	1	-5.23	0	0	1	-7.84	0	0	1	-6.12	0	0	1	-6	0	0	1	-6.32	0	0	1	-6.58	0	0	1	0
0	FBgn0039342	CG5107	CG5107	-1.1	0.641594	0.999395	0	-1.36	0.145491	0.946789	0	-2.02	0.001305	0.045617	1	-4.4	0	1e-06	1	-5.92	0	0	1	-5.69	0	0	1	-7.49	0	0	1	-7.22	0	0	1	-7.54	0	0	1	-8.52	0	0	1	-7.18	0	0	1	0
0	FBgn0038611	CG14309	CG14309	-1.04	0.813752	0.999395	0	-1.09	0.636953	0.988335	0	-1.83	0.001245	0.044575	1	-2.44	6e-06	0.000493	1	-3.62	0	0	1	-3.33	0	1e-06	1	-3.42	0	1e-06	1	-4.31	0	0	1	-5.26	0	0	1	-6.75	0	0	1	-7.27	0	0	1	0
0	FBgn0039472	CG17192	CG17192	1.15	0.47912	0.999395	0	-1.28	0.201538	0.957756	0	-3.08	0	6.7e-05	1	-5.95	0	0	1	-5.76	0	0	1	-8.32	0	0	1	-7.7	0	0	1	-9.2	0	0	1	-9.56	0	0	1	-7.04	0	0	1	-8.74	0	0	1	0
1	FBgn0030317	CG1561	CG1561	-1.2	0.067876	0.999395	0	-1.49	0.000148	0.036112	0	-1.56	2.7e-05	0.002566	1	-1.74	1e-06	8.1e-05	1	-1.71	1e-06	7.6e-05	1	-1.86	0	4e-06	1	-1.9	0	2e-06	1	-2.12	0	0	1	-2.44	0	0	1	-2.99	0	0	1	-1.99	0	0	1	1
1	FBgn0039151	CG13607	CG13607	1.11	0.304574	0.999395	0	-1.24	0.03316	0.664013	0	-1.69	2e-06	0.00036	1	-1.68	2e-06	0.00026	1	-1.92	0	2e-06	1	-1.89	0	3e-06	1	-2.14	0	0	1	-1.9	0	2e-06	1	-2.4	0	0	1	-2.52	0	0	1	-2.02	0	0	1	1
1	FBgn0031461	dawdle	daw	1.02	0.867423	0.999395	0	-1.2	0.136459	0.940266	0	-2.08	0	5.5e-05	1	-2.39	0	1e-06	1	-1.86	2.1e-05	0.001023	1	-1.94	1e-06	6.4e-05	1	-2.25	0	1e-06	1	-2.25	0	1e-06	1	-2	0	2.3e-05	1	-2.1	0	5e-06	1	-2.04	0	1.3e-05	1	1
1	FBgn0039313	CG11892	CG11892	-1.01	0.921284	0.999703	0	-1.24	0.045273	0.749518	0	-1.53	0.000167	0.010381	1	-1.85	0	4.4e-05	1	-1.99	0	3e-06	1	-1.77	1e-06	6.9e-05	1	-1.65	1.5e-05	0.000611	1	-1.98	0	2e-06	1	-2.1	0	0	1	-2.23	0	0	1	-2.09	0	0	1	1
1	FBgn0053521	CG33521	CG33521	-1.43	0.023005	0.957371	0	-1.71	0.000984	0.118723	0	-2.14	7e-06	0.000985	1	-2.22	3e-06	0.000309	1	-2.27	2e-06	0.000126	1	-2.07	1.6e-05	0.00058	1	-1.84	0.000207	0.005529	1	-1.93	7.5e-05	0.002051	1	-2.07	1.5e-05	0.000457	1	-2.17	5e-06	0.000153	1	-2.13	8e-06	0.000235	1	1
1	FBgn0043783	CG32444	CG32444	-1.03	0.788383	0.999395	0	-1.33	0.01259	0.450174	0	-1.66	2.3e-05	0.002249	1	-1.81	1e-06	0.000161	1	-1.99	0	6e-06	1	-1.79	2e-06	9.6e-05	1	-1.87	0	3.1e-05	1	-1.91	0	1.3e-05	1	-2.66	0	0	1	-3.07	0	0	1	-2.21	0	0	1	1
1	FBgn0027571	CG3523	CG3523	1.02	0.868863	0.999395	0	-1.29	0.012272	0.444389	0	-1.82	0	4e-05	1	-1.71	1e-06	0.000161	1	-1.94	0	2e-06	1	-2.01	0	0	1	-2.03	0	0	1	-2.26	0	0	1	-2.27	0	0	1	-2.38	0	0	1	-2.41	0	0	1	1
1	FBgn0051772	CG31772	CG31772	1.05	0.622692	0.999395	0	1.04	0.729904	0.988753	0	-1.61	3e-05	0.002735	1	-2.07	0	1e-06	1	-2.06	0	1e-06	1	-2.33	0	0	1	-2.35	0	0	1	-2.15	0	1e-06	1	-2.1	0	0	1	-2.13	0	0	1	-2.45	0	0	1	1
1	FBgn0023077	inaF-A	inaF-A	-1.16	0.396053	0.999395	0	-1.59	0.01046	0.411658	0	-2.08	0.000104	0.007402	1	-1.96	0.000927	0.028069	1	-2.43	5e-06	0.00028	1	-2.03	0.000173	0.004377	1	-2.15	5.6e-05	0.001845	1	-2.06	0.000132	0.003236	1	-2.08	0.000102	0.002207	1	-2.47	3e-06	0.000105	1	-2.5	3e-06	9.3e-05	1	1
1	FBgn0032726	CG10621	CG10621	-1.01	0.906416	0.999395	0	-1.52	0.000314	0.060684	0	-1.88	0	9.9e-05	1	-2.28	0	0	1	-2.78	0	0	1	-2.23	0	0	1	-2.08	0	1e-06	1	-2.46	0	0	1	-3.59	0	0	1	-2.94	0	0	1	-2.51	0	0	1	1
1	FBgn0035781	CG8560	CG8560	1.18	0.08793	0.999395	0	-1.17	0.103259	0.917012	0	-1.95	0	3e-06	1	-2.39	0	0	1	-2.55	0	0	1	-2.58	0	0	1	-2.77	0	0	1	-2.56	0	0	1	-2.64	0	0	1	-2.47	0	0	1	-2.57	0	0	1	1
1	FBgn0020640	Lcp65Ae	Lcp65Ae	-1.75	0.000192	0.229932	0	-1.15	0.329923	0.968993	0	-2.21	1e-06	0.000134	1	-1.64	0.000756	0.02388	1	-2.3	0	1.7e-05	1	-2.45	0	3e-06	1	-2.4	0	5e-06	1	-3.26	0	0	1	-3.09	0	0	1	-3.23	0	0	1	-2.72	0	0	1	1
1	FBgn0035667	Jonah 65Ai	Jon65Ai	-1.05	0.711938	0.999395	0	-1.17	0.216699	0.957756	0	-1.53	0.001266	0.044984	1	-2.06	0	6.6e-05	1	-2.41	0	1e-06	1	-2.19	0	5e-06	1	-2.67	0	0	1	-2.64	0	0	1	-2.94	0	0	1	-3.15	0	0	1	-2.74	0	0	1	1
1	FBgn0035779	CG8562	CG8562	1.19	0.175101	0.999395	0	-1.12	0.377914	0.97412	0	-1.53	0.001275	0.045049	1	-2.14	0	2.1e-05	1	-2.36	0	1e-06	1	-2.45	0	0	1	-2.61	0	0	1	-2.59	0	0	1	-2.89	0	0	1	-2.88	0	0	1	-2.89	0	0	1	1
1	FBgn0035666	Jonah 65Aii	Jon65Aii	-1.02	0.854375	0.999395	0	-1.29	0.028459	0.634064	0	-1.71	1.8e-05	0.001819	1	-2.4	0	0	1	-2.52	0	0	1	-2.45	0	0	1	-2.97	0	0	1	-2.53	0	0	1	-3.08	0	0	1	-2.73	0	0	1	-2.95	0	0	1	1
1	FBgn0052751	CG32751	CG32751	1.03	0.870001	0.999395	0	-1.24	0.206156	0.957756	0	-2.16	2e-05	0.002031	1	-2.03	7e-05	0.003755	1	-2.42	2e-06	0.000121	1	-1.99	0.000113	0.00308	1	-1.89	0.000308	0.00762	1	-3.75	0	0	1	-3.29	0	0	1	-2.73	0	5e-06	1	-3.08	0	0	1	1
1	FBgn0036996	CG5932	CG5932	1.22	0.066494	0.999395	0	-1.11	0.325442	0.968964	0	-1.62	3.5e-05	0.003164	1	-2.53	0	0	1	-2.53	0	0	1	-2.54	0	0	1	-2.37	0	0	1	-2.78	0	0	1	-3.92	0	0	1	-3.2	0	0	1	-3.25	0	0	1	1
1	FBgn0032144	CG17633	CG17633	1.18	0.067667	0.999395	0	-1.03	0.765171	0.990573	0	-1.56	4e-06	0.000658	1	-2.41	0	0	1	-2.75	0	0	1	-2.44	0	0	1	-2.78	0	0	1	-2.74	0	0	1	-3.23	0	0	1	-3.44	0	0	1	-3.27	0	0	1	1
1	FBgn0030439	CG12716	CG12716	-1.17	0.294359	0.999395	0	-1.03	0.860784	0.996946	0	-1.75	0.000374	0.019374	1	-1.87	8.7e-05	0.004516	1	-1.85	0.000113	0.003994	1	-2.63	0	2e-06	1	-2.31	1e-06	3.9e-05	1	-2.69	0	1e-06	1	-3.06	0	0	1	-2.86	0	0	1	-3.41	0	0	1	1
3	FBgn0039152	CG6129	CG6129	-1.06	0.532126	0.999395	0	-1.29	0.004454	0.277451	0	-1.74	0	1.4e-05	1	-1.56	3e-06	0.000344	1	-1.53	7e-06	0.000392	1	-1.7	0	6e-06	1	-1.68	0	1.1e-05	1	-1.63	1e-06	3e-05	1	-1.71	0	4e-06	1	-1.56	3e-06	9.8e-05	1	-1.53	8e-06	0.000241	1	3
3	FBgn0003721	Tropomyosin 1	Tm1	-1.16	0.153255	0.999395	0	-1.41	0.001986	0.187877	0	-1.54	0.000139	0.00924	1	-1.59	4.6e-05	0.002726	1	-1.54	0.000142	0.004809	1	-1.65	1.5e-05	0.000555	1	-1.51	0.00025	0.006441	1	-1.61	2.9e-05	0.000902	1	-1.84	0	1.7e-05	1	-1.76	2e-06	5.2e-05	1	-1.54	0.000134	0.002642	1	3
3	FBgn0037146	CG7470	CG7470	-1.06	0.59378	0.999395	0	-1.11	0.29879	0.968665	0	-1.64	1.3e-05	0.001404	1	-1.98	0	3e-06	1	-1.91	0	6e-06	1	-1.81	0	2.3e-05	1	-1.7	4e-06	0.000177	1	-1.83	0	1.5e-05	1	-1.89	0	5e-06	1	-2.04	0	0	1	-1.59	3.1e-05	0.000777	1	3
3	FBgn0015609	Cadherin-N	CadN	-1.06	0.62295	0.999395	0	-1.42	0.002472	0.204189	0	-2.02	0	3e-05	1	-1.73	0.000965	0.029014	1	-1.78	1.8e-05	0.000882	1	-1.78	8.5e-05	0.002449	1	-1.77	1.7e-05	0.00068	1	-1.87	1e-06	3.5e-05	1	-1.54	0.000732	0.011628	1	-1.9	0	1.8e-05	1	-1.6	9.8e-05	0.002077	1	3
3	FBgn0002719	Malic enzyme	Men	1.06	0.487251	0.999395	0	-1.15	0.126644	0.933453	0	-1.79	0	1.1e-05	1	-1.57	4e-06	0.000391	1	-1.56	6e-06	0.000356	1	-1.62	1e-06	7.4e-05	1	-1.66	0	3.1e-05	1	-1.98	0	0	1	-1.79	0	1e-06	1	-1.77	0	2e-06	1	-1.62	1e-06	5.1e-05	1	3
3	FBgn0033782	sugarbabe	sug	1.12	0.257162	0.999395	0	-1.16	0.134124	0.940266	0	-1.68	1e-06	0.000243	1	-1.75	0	4.5e-05	1	-1.69	1e-06	7.4e-05	1	-1.74	0	2e-05	1	-1.95	0	0	1	-1.77	0	1e-05	1	-2.11	0	0	1	-2.02	0	0	1	-1.7	1e-06	3.2e-05	1	3
3	FBgn0036672	Limpet	Lmpt	1	0.960602	0.999703	0	-1.44	0.00031	0.060684	0	-1.76	0	5.7e-05	1	-1.73	0	6.3e-05	1	-1.69	1e-06	6.7e-05	1	-1.56	1.9e-05	0.000658	1	-1.6	8e-06	0.000329	1	-1.72	0	2.8e-05	1	-1.78	0	7e-06	1	-1.75	0	9e-06	1	-1.78	0	7e-06	1	3
3	FBgn0033216	CG1946	CG1946	1.16	0.177009	0.999395	0	-1.18	0.144313	0.946789	0	-1.53	0.00026	0.014788	1	-1.58	0.000108	0.005524	1	-1.66	9.3e-05	0.003487	1	-1.6	6.9e-05	0.002043	1	-1.54	0.000251	0.00645	1	-2	0	4e-06	1	-1.77	3e-06	0.000107	1	-1.85	1e-06	2.5e-05	1	-1.83	1e-06	4.1e-05	1	3
3	FBgn0022160	Glycerophosphate oxidase-1	Gpo-1	1.16	0.114512	0.999395	0	-1.26	0.015516	0.495049	0	-1.61	3e-06	0.000504	1	-1.6	4e-06	0.00042	1	-1.68	1e-06	4.8e-05	1	-1.51	4.5e-05	0.001404	1	-1.72	0	1.9e-05	1	-1.88	0	1e-06	1	-2.28	0	0	1	-2.33	0	0	1	-1.99	0	0	1	3
3	FBgn0035734	CG14823	CG14823	-1.07	0.63872	0.999395	0	-1.57	0.003204	0.235311	0	-2.31	0	0.000129	1	-1.68	0.000808	0.025046	1	-1.67	0.002586	0.049985	1	-2.29	1e-06	3.6e-05	1	-1.74	0.000393	0.009322	1	-2.51	0	4e-06	1	-2.3	1e-06	2.5e-05	1	-2.83	0	2e-06	1	-2.08	6e-06	0.000196	1	3
5	FBgn0038299	CG6687	CG6687	-1.1	0.552626	0.999395	0	1.27	0.1325	0.940266	0	2.26	3e-06	0.000557	1	2.68	0	1.3e-05	1	2.32	2e-06	0.000139	1	3.81	0	0	1	3.53	0	0	1	3.2	0	0	1	2.58	0	9e-06	1	2.67	0	4e-06	1	3.32	0	0	1	5
5	FBgn0032879	CG9317	CG9317	1.09	0.48253	0.999395	0	-1.02	0.853962	0.996946	0	1.64	0.000141	0.009307	1	2.22	0	4e-06	1	2.52	0	0	1	2.44	0	0	1	2.6	0	0	1	3.22	0	0	1	3.17	0	0	1	2.76	0	0	1	3.19	0	0	1	5
5	FBgn0030993	Mec2	Mec2	-1.19	0.626709	0.999395	0	1.43	0.121432	0.928529	0	2.19	0.000485	0.023345	1	3.63	0	3.1e-05	1	2.13	0.001881	0.039133	1	3.83	0	6e-06	1	2.74	1.6e-05	0.000622	1	2.5	0.003162	0.040575	1	2.49	0.000223	0.004328	1	2.14	0.004588	0.040637	1	3.08	1.2e-05	0.00035	1	5
5	FBgn0031412	CG16995	CG16995	1.07	0.672446	0.999395	0	1.24	0.170347	0.949598	0	2.39	1e-06	0.000211	1	2.14	1.2e-05	0.000927	1	1.99	5.8e-05	0.002355	1	2.77	0	3e-06	1	2.27	1.5e-05	0.000601	1	2.56	0	1.1e-05	1	2.04	0.000125	0.002635	1	2.16	9e-06	0.000246	1	3.01	0	0	1	5
5	FBgn0033926	Arc1	Arc1	1.04	0.851771	0.999395	0	1.72	0.004857	0.294225	0	2.63	2e-06	0.0004	1	2.32	2.6e-05	0.001712	1	2.59	3e-06	0.000196	1	3.12	0	6e-06	1	2.47	8e-06	0.000352	1	2.84	0	2.8e-05	1	2.38	1.5e-05	0.000463	1	3.05	0	5e-06	1	2.89	0	1.6e-05	1	5
5	FBgn0031490	CG17264	CG17264	1.16	0.33274	0.999395	0	1.53	0.00773	0.368175	0	2.74	0	1.1e-05	1	3.01	0	1e-06	1	2.77	0	2e-06	1	3.19	0	0	1	2.79	0	1e-06	1	2.68	0	3e-06	1	2.39	1e-06	2.4e-05	1	2.2	4e-06	0.000112	1	2.81	0	1e-06	1	5
5	FBgn0039208	CG6643	CG6643	-1.11	0.536918	0.999395	0	1.48	0.021601	0.585466	0	2.47	1e-06	0.000248	1	2.7	0	2.9e-05	1	2.68	0	2e-05	1	3.09	0	1e-06	1	2.46	1e-06	7.1e-05	1	2.65	1.2e-05	0.000404	1	2.31	5e-06	0.000177	1	1.88	0.00036	0.005576	1	2.73	0	7e-06	1	5
5	FBgn0033397	Cyp4p3	Cyp4p3	-1.09	0.542778	0.999395	0	1.5	0.005058	0.298169	0	1.69	0.000338	0.017796	1	2.47	0	4e-06	1	1.96	1e-05	0.00054	1	3.14	0	0	1	2.48	0	2e-06	1	2.58	0	1e-06	1	2.24	0	1.4e-05	1	2.31	0	5e-06	1	2.71	0	0	1	5
5	FBgn0022700	Chitinase 4	Cht4	-1.03	0.817423	0.999395	0	1.22	0.154117	0.947216	0	1.74	3.9e-05	0.003477	1	1.57	0.001493	0.040178	1	1.58	0.000526	0.01396	1	2.84	0	0	1	2.62	0	0	1	2.45	0	0	1	1.88	5e-06	0.000168	1	2.02	1e-06	2.2e-05	1	2.63	0	0	1	5
5	FBgn0003961	Urate oxidase	Uro	1.37	0.065488	0.999395	0	1.36	0.070939	0.864221	0	2.08	5.8e-05	0.004635	1	2.45	2e-06	0.000236	1	2.79	1e-06	6.5e-05	1	3.36	0	0	1	2.81	0	8e-06	1	2.55	1e-06	4.3e-05	1	1.93	0.000263	0.004961	1	1.85	0.000565	0.007957	1	2.47	2e-06	5.9e-05	1	5
5	FBgn0029766	CG15784	CG15784	1.1	0.323487	0.999395	0	1.32	0.005341	0.309698	0	1.73	1e-06	0.000134	1	1.72	1e-06	9e-05	1	2.09	0	0	1	2.41	0	0	1	2.14	0	0	1	2.2	0	0	1	2.08	0	0	1	2.03	0	0	1	2.43	0	0	1	5
5	FBgn0043578	PGRP-SB1	PGRP-SB1	-1.07	0.592561	0.999395	0	1.24	0.083332	0.895664	0	1.8	1.1e-05	0.001336	1	2.04	0	4.4e-05	1	2.16	0	6e-06	1	2.85	0	0	1	2.35	0	0	1	2.54	0	0	1	1.9	2e-06	9.1e-05	1	1.69	7.3e-05	0.001489	1	2.29	0	1e-06	1	5
5	FBgn0035176	CG13905	CG13905	-1.09	0.431643	0.999395	0	1.03	0.782172	0.993204	0	1.6	4.1e-05	0.003572	1	2.04	0	3e-06	1	2.15	0	0	1	2.57	0	0	1	2.07	0	1e-06	1	2.08	0	1e-06	1	1.62	3.3e-05	0.000865	1	1.62	2.8e-05	0.000683	1	2.2	0	0	1	5
5	FBgn0051901	Mucin related 29B	Mur29B	1.05	0.646805	0.999395	0	1.53	0.000281	0.056886	0	1.85	1e-06	0.000172	1	1.87	0	7.5e-05	1	1.84	1e-06	6.6e-05	1	3.12	0	0	1	2.77	0	0	1	2.35	0	0	1	1.92	0	1.1e-05	1	1.69	1.4e-05	0.000368	1	2.13	0	0	1	5
5	FBgn0046776	CG14033	CG14033	1.33	0.002739	0.624502	0	1.42	0.000384	0.069099	0	1.62	2e-06	0.000413	1	1.5	4.7e-05	0.002775	1	1.81	0	4e-06	1	1.77	0	6e-06	1	1.96	0	0	1	2.36	0	0	1	2.14	0	0	1	2.09	0	0	1	2.05	0	0	1	5
8	FBgn0032935	CG8678	CG8678	-1.24	0.220391	0.999395	0	1.41	0.053873	0.787326	0	2.3	1.1e-05	0.001305	1	4.27	0	0	1	5.98	0	0	1	8.32	0	0	1	9.1	0	0	1	7.84	0	0	1	9.44	0	0	1	6.77	0	0	1	15.77	0	0	1	8
8	FBgn0023541	Cyp4d14	Cyp4d14	-1.53	0.109237	0.999395	0	1.27	0.362623	0.972321	0	3.49	1.2e-05	0.001368	1	9.45	0	0	1	15.64	0	0	1	21.5	0	0	1	15.76	0	0	1	15.36	0	0	1	11.93	0	0	1	17.98	0	0	1	13.5	0	0	1	8
8	FBgn0033610	CG18335	CG18335	1.14	0.620096	0.999395	0	2.16	0.002428	0.204189	0	4.45	0	4e-05	1	6.49	0	1e-06	1	10.05	0	0	1	8.81	0	0	1	7.91	0	0	1	12.23	0	0	1	7.5	0	0	1	7.81	0	0	1	13.28	0	0	1	8
8	FBgn0042206	Glutathione S transferase D10	GstD10	-1.75	0.039678	0.999395	0	1.43	0.180293	0.950325	0	3.55	1.3e-05	0.001485	1	7.49	0	1e-06	1	11.64	0	0	1	16.28	0	0	1	12.27	0	0	1	12.07	0	0	1	7.79	0	0	1	12.75	0	0	1	10.15	0	0	1	8
8	FBgn0004240	Diptericin	Dpt	-1.42	0.209249	0.999395	0	2.4	0.002338	0.204108	0	6.64	0	3e-06	1	5.7	0	9e-06	1	7.38	0	0	1	12.49	0	0	1	8.45	0	0	1	12.17	0	0	1	8.04	0	0	1	7.67	0	0	1	9.95	0	0	1	8
8	FBgn0041579	Attacin-C	AttC	-1.17	0.588026	0.999395	0	1.36	0.286013	0.968329	0	3.99	1.1e-05	0.001336	1	4.49	3e-06	0.000288	1	4.92	1e-06	6.7e-05	1	8.93	0	0	1	8.09	0	0	1	7.64	0	0	1	6.13	0	3e-06	1	5.57	0	7e-06	1	7.09	0	0	1	8
8	FBgn0036351	CG14107	CG14107	1.18	0.415242	0.999395	0	1.43	0.07322	0.868144	0	2.3	8.1e-05	0.006228	1	5.21	0	0	1	9.48	0	0	1	11.13	0	0	1	9.25	0	0	1	8.81	0	0	1	8.42	0	0	1	10.71	0	0	1	6.99	0	0	1	8
8	FBgn0038939	CG34377	CG34377	1.74	0.142464	0.999395	0	1.51	0.155811	0.947558	0	2.57	0.000699	0.029451	1	4.05	2e-06	0.000232	1	6.87	0	0	1	7.4	0	0	1	6.11	0	1e-06	1	8.1	0	0	1	7.18	0	0	1	7.03	0	0	1	6.3	0	0	1	8
8	FBgn0035429	CG12017	CG12017	1.09	0.625103	0.999395	0	1.11	0.557845	0.984159	0	2.03	0.000203	0.01221	1	4.75	0	0	1	7.63	0	0	1	10.8	0	0	1	5.76	0	0	1	8.02	0	0	1	5.43	0	0	1	8.92	0	0	1	6.27	0	0	1	8
8	FBgn0030051	Serine Protease Immune Response Integrator	spirit	1.07	0.715101	0.999395	0	1.62	0.010637	0.416135	0	2.1	0.000155	0.009869	1	4.5	0	0	1	6.64	0	0	1	5.51	0	0	1	4.64	0	0	1	4.85	0	0	1	5.68	0	0	1	4.99	0	0	1	5.2	0	0	1	8
8	FBgn0033789	CG13324	CG13324	1.04	0.876927	0.999395	0	2.27	0.001775	0.176803	0	3.42	8e-06	0.001024	1	3.38	9e-06	0.000745	1	3.81	2e-06	0.000118	1	5.12	0	2e-06	1	4.95	0	3e-06	1	5.35	0	1e-06	1	3.72	2e-06	8.6e-05	1	2.54	0.000453	0.006722	1	4.69	0	4e-06	1	8
8	FBgn0032638	CG6639	CG6639	-1.16	0.664981	0.999395	0	1.17	0.52413	0.982072	0	2.79	0.000123	0.008356	1	4.67	5e-06	0.000436	1	5.48	0	1e-06	1	6.55	0	0	1	5.27	0	1e-06	1	8.91	0	0	1	6.7	0	0	1	6.06	0	0	1	4.52	0	7e-06	1	8
8	FBgn0041581	Attacin-B	AttB	1.04	0.838782	0.999395	0	1.29	0.223461	0.957756	0	2.79	6e-06	0.000805	1	2.61	1.8e-05	0.001348	1	2.97	2e-06	0.000132	1	4.97	0	0	1	4.29	0	0	1	4.72	0	0	1	3.36	0	1.1e-05	1	2.91	3e-06	8.5e-05	1	4.44	0	0	1	8
8	FBgn0040503	CG7763	CG7763	1.17	0.531431	0.999395	0	1.48	0.13021	0.937274	0	2.52	0.000584	0.026572	1	3.3	6.9e-05	0.003723	1	2.69	0.000255	0.007845	1	3.96	1e-06	6.8e-05	1	4.11	1e-06	4.6e-05	1	3.91	8e-06	0.000291	1	2.54	0.000534	0.009017	1	2.42	0.000963	0.012385	1	4.33	0	1.6e-05	1	8
8	FBgn0034407	Diptericin B	DptB	-1.18	0.404334	0.999395	0	1.59	0.021779	0.586776	0	2.93	1e-06	0.000227	1	2.26	0.000111	0.005555	1	3.12	0	2.9e-05	1	4.4	0	0	1	4.62	0	0	1	4.61	0	0	1	3.57	0	2e-06	1	3.4	0	3e-06	1	4.29	0	0	1	8
8	FBgn0028396	Turandot A	TotA	-1.92	0.036351	0.999395	0	2.09	0.018482	0.55221	0	4.44	9e-06	0.001106	1	2.89	0.00096	0.028928	1	3.52	0.000119	0.004171	1	4.58	6e-06	0.000256	1	4.45	8e-06	0.000352	1	4.58	6e-06	0.000225	1	3.12	0.000436	0.007565	1	2.69	0.001955	0.021567	1	3.82	4.8e-05	0.001139	1	8
8	FBgn0053532	lectin-37Da	lectin-37Da	-1.06	0.82152	0.999395	0	2.54	0.000341	0.064954	0	4.45	0	4e-05	1	4.5	0	1.6e-05	1	3.71	2e-06	0.000111	1	6.31	0	0	1	5.04	0	1e-06	1	4.13	0	1.8e-05	1	3.78	1e-06	4.8e-05	1	2.44	0.000564	0.007957	1	3.72	1e-06	5.6e-05	1	8
8	FBgn0036320	CG10943	CG10943	1.11	0.663787	0.999395	0	2.06	0.004981	0.297637	0	2.79	0.000107	0.007584	1	3.62	3e-06	0.000296	1	3.49	5e-06	0.000279	1	5.1	0	1e-06	1	4.34	0	1.4e-05	1	3.08	0.000104	0.002688	1	3.55	4e-06	0.000127	1	2.74	0.000137	0.002552	1	3.7	2e-06	7.2e-05	1	8
8	FBgn0044812	Turandot C	TotC	-1.96	0.027914	0.964922	0	2.24	0.008986	0.388145	0	5.17	1e-06	0.000221	1	2.78	0.001163	0.033237	1	3.91	0.000104	0.003712	1	4.4	7e-06	0.00029	1	4.03	1.9e-05	0.000745	1	4.14	1.4e-05	0.000484	1	2.92	0.000689	0.011071	1	2.51	0.003161	0.030754	1	3.63	6.4e-05	0.001453	1	8
8	FBgn0033857	CG13335	CG13335	-1.15	0.46859	0.999395	0	1.85	0.001939	0.186025	0	2.79	1e-06	0.000248	1	3.03	0	4e-05	1	3.07	0	1.8e-05	1	5.2	0	0	1	5.45	0	0	1	4.69	0	0	1	3.7	0	0	1	2.77	1e-06	4.6e-05	1	3.6	0	1e-06	1	8
8	FBgn0038346	CG14872	CG14872	-1	0.985068	0.999703	0	1.82	0.000426	0.072789	0	2.16	1.2e-05	0.001344	1	3.28	0	0	1	3.01	0	1e-06	1	4.61	0	0	1	4.06	0	0	1	3.83	0	0	1	3.69	0	0	1	2.6	0	7e-06	1	3.56	0	0	1	8
8	FBgn0038530	Attacin-D	AttD	1.19	0.398762	0.999395	0	1.38	0.131778	0.939837	0	2.9	4e-06	0.000658	1	2.48	5.9e-05	0.00329	1	2.68	1.6e-05	0.000802	1	4.09	0	1e-06	1	3.96	0	2e-06	1	3.55	1e-06	5.2e-05	1	2.43	8.1e-05	0.001819	1	2.32	0.000173	0.003093	1	3.42	0	1.2e-05	1	8
8	FBgn0034318	CG14500	CG14500	-1.15	0.594389	0.999395	0	2.32	0.001855	0.179329	0	3.18	3.5e-05	0.003164	1	3.41	1.3e-05	0.001035	1	3.03	6.7e-05	0.002624	1	6.15	0	0	1	4.45	0	2.2e-05	1	4.25	1e-06	3.2e-05	1	3.05	6.1e-05	0.001437	1	2.17	0.00383	0.035531	1	3.34	1.8e-05	0.000497	1	8
8	FBgn0036948	CG7298	CG7298	1.71	0.044584	0.999395	0	2.56	0.000251	0.052452	0	3.39	5e-06	0.00068	1	2.72	0.000358	0.013617	1	3.69	1e-06	9.4e-05	1	4.23	0	1.1e-05	1	5.07	0	1e-06	1	5.34	0	0	1	3.32	6e-06	0.000208	1	2.23	0.003452	0.03304	1	3.2	1.1e-05	0.000322	1	8
8	FBgn0030929	CG15043	CG15043	-1.08	0.683793	0.999395	0	1.87	0.00252	0.204189	0	2.54	1.7e-05	0.001804	1	2.77	4e-06	0.000349	1	2.69	6e-06	0.000355	1	4.49	0	0	1	3.72	0	1e-06	1	4.06	0	0	1	3.02	1e-06	3.3e-05	1	1.81	0.004284	0.038729	1	3.14	0	1.6e-05	1	8
1	FBgn0033872	CG6329	CG6329	-1.32	0.028968	0.964922	0	-2.07	0	0.000388	1	-1.36	0.016916	0.223025	0	-1.72	5.5e-05	0.003143	1	-1.77	2.6e-05	0.001201	1	-1.9	3e-06	0.000153	1	-2.11	0	1.2e-05	1	-1.86	6e-06	0.000239	1	-2.15	0	5e-06	1	-2.16	0	3e-06	1	-2.07	0	1.3e-05	1	1
3	FBgn0000038	nicotinic Acetylcholine Receptor beta 64B	nAcRbeta-64B	-1.06	0.640898	0.999395	0	-1.82	1.2e-05	0.005563	1	-1.47	0.00328	0.084057	0	-1.74	4.3e-05	0.002583	1	-2.11	0	1.8e-05	1	-1.96	1e-06	7.4e-05	1	-2.03	1e-06	3.4e-05	1	-2.35	0	1e-06	1	-1.71	6.5e-05	0.001499	1	-1.5	0.0019	0.021116	1	-1.67	0.000124	0.002491	1	3
0	FBgn0004430	Lysozyme S	LysS	-1.03	0.835627	0.999395	0	1.32	0.056008	0.797569	0	-1.09	0.529301	0.861989	0	-3.08	0	0	1	-2.86	0	0	1	-2.88	0	0	1	-3.4	0	0	1	-2.96	0	0	1	-4.03	0	0	1	-4.32	0	0	1	-3.47	0	0	1	0
0	FBgn0032049	beta-site APP-cleaving enzyme	Bace	1.37	0.076796	0.999395	0	-1.09	0.609036	0.988335	0	-1.6	0.009631	0.164849	0	-3.04	0	9e-06	1	-3.3	0	1e-06	1	-2.38	7e-06	0.000295	1	-2.78	0	2e-05	1	-3.02	0	3e-06	1	-3.47	0	0	1	-3.61	0	0	1	-3.54	0	0	1	0
0	FBgn0031654	Jonah 25Bii	Jon25Bii	1.33	0.031979	0.971141	0	1.03	0.812187	0.994329	0	-1.47	0.004348	0.099731	0	-2.3	0	6e-06	1	-2.74	0	0	1	-2.58	0	0	1	-3.03	0	0	1	-2.89	0	0	1	-3.66	0	0	1	-3.61	0	0	1	-3.82	0	0	1	0
0	FBgn0035328	yellow-g2	yellow-g2	-1.19	0.223531	0.999395	0	1.04	0.764568	0.990542	0	-1.41	0.008826	0.156279	0	-1.79	2.8e-05	0.001846	1	-2.6	0	0	1	-2.7	0	0	1	-3.34	0	0	1	-2.57	0	0	1	-4.3	0	0	1	-3.5	0	0	1	-3.94	0	0	1	0
0	FBgn0001285	Jonah 44E	Jon44E	1.37	0.065407	0.999395	0	-1.11	0.55171	0.984159	0	-1.66	0.003534	0.086985	0	-2.39	3e-06	0.000296	1	-3.27	0	0	1	-3.38	0	0	1	-4.11	0	0	1	-3.92	0	0	1	-5.24	0	0	1	-5.4	0	0	1	-4.26	0	0	1	0
0	FBgn0036024	CG18180	CG18180	1.14	0.506717	0.999395	0	-1.08	0.70791	0.988335	0	-1.42	0.076485	0.464708	0	-2.21	0.000126	0.006075	1	-3.03	0	3.5e-05	1	-2.31	5.8e-05	0.001746	1	-3.2	0	1.1e-05	1	-3.04	0	2e-05	1	-3.16	0	9e-06	1	-4.44	0	0	1	-4.54	0	0	1	0
0	FBgn0004047	Yolk protein 3	Yp3	1.03	0.846291	0.999395	0	-1.13	0.47962	0.979862	0	-1.51	0.015449	0.211626	0	-1.98	0.000119	0.005823	1	-2.68	0	1.8e-05	1	-1.73	0.001607	0.026305	1	-2.42	2e-06	8.5e-05	1	-2.62	0	1.7e-05	1	-4.15	0	0	1	-5.15	0	0	1	-4.89	0	0	1	0
0	FBgn0031653	Jonah 25Biii	Jon25Biii	1.16	0.287175	0.999395	0	-1.07	0.602762	0.988335	0	-1.56	0.001962	0.059923	0	-2.65	0	1e-06	1	-3.77	0	0	1	-3.82	0	0	1	-4.52	0	0	1	-3.44	0	0	1	-4.96	0	0	1	-5.43	0	0	1	-4.95	0	0	1	0
0	FBgn0030098	CG12057	CG12057	1.09	0.681579	0.999395	0	1.08	0.712025	0.988335	0	-1.92	0.001777	0.057171	0	-4.72	0	0	1	-3.81	0	2e-06	1	-5.05	0	0	1	-6.1	0	0	1	-3.53	0	3e-06	1	-6	0	0	1	-5.22	0	0	1	-5.39	0	0	1	0
0	FBgn0052602	Mucin 12Ea	Muc12Ea	1.07	0.617265	0.999395	0	-1.09	0.533447	0.984134	0	-1.24	0.121953	0.549466	0	-2	5e-06	0.000466	1	-2.8	0	0	1	-3.88	0	0	1	-4.23	0	0	1	-4.03	0	0	1	-5.93	0	0	1	-4.86	0	0	1	-5.42	0	0	1	0
0	FBgn0038395	CG10407	CG10407	-1.05	0.769668	0.999395	0	-1.12	0.488216	0.979862	0	-1.75	0.001552	0.051654	0	-2.44	2e-06	0.000236	1	-3.63	0	0	1	-2.88	0	4e-06	1	-3.61	0	0	1	-3.91	0	0	1	-5.57	0	0	1	-5.61	0	0	1	-5.83	0	0	1	0
0	FBgn0014466	Chorion protein c at 7F	Cp7Fc	-1.02	0.886902	0.999395	0	1.21	0.218655	0.957756	0	-1.41	0.025157	0.274661	0	-2	2.2e-05	0.001541	1	-2.98	0	0	1	-3	0	0	1	-3.82	0	0	1	-3.26	0	0	1	-6.17	0	0	1	-5.58	0	0	1	-6.32	0	0	1	0
0	FBgn0003979	Vitelline membrane 26Aa	Vm26Aa	-1.09	0.651835	0.999395	0	-1.02	0.928412	0.997504	0	-1.12	0.548858	0.870584	0	-1.85	0.001261	0.035801	1	-2.11	0.000121	0.004231	1	-2.73	1e-06	4.4e-05	1	-3.11	0	5e-06	1	-3.66	0	0	1	-4.06	0	0	1	-6.43	0	0	1	-6.7	0	0	1	0
0	FBgn0000427	defective chorion 1	2009-12-01	1.06	0.668428	0.999395	0	-1.04	0.802726	0.99325	0	-1.44	0.014328	0.203986	0	-2.06	5e-06	0.000466	1	-2.8	0	0	1	-3.24	0	0	1	-3.65	0	0	1	-4.26	0	0	1	-6.39	0	0	1	-7.63	0	0	1	-7.89	0	0	1	0
0	FBgn0000359	Chorion protein 36	Cp36	-1.15	0.438608	0.999395	0	1.13	0.494092	0.980205	0	-1.43	0.043972	0.362873	0	-1.78	0.001662	0.044051	1	-3.22	0	2e-06	1	-4.11	0	0	1	-5.22	0	0	1	-4.88	0	0	1	-10.63	0	0	1	-9.75	0	0	1	-9.48	0	0	1	0
1	FBgn0023197	Jonah 74E	Jon74E	1.02	0.84346	0.999395	0	1.02	0.851943	0.996946	0	-1.26	0.057756	0.415549	0	-1.87	2e-06	0.000225	1	-2.02	0	1.8e-05	1	-2.04	0	9e-06	1	-2.13	0	3e-06	1	-1.95	0	2.8e-05	1	-2.12	0	2e-06	1	-2.53	0	0	1	-1.86	2e-06	8e-05	1	1
1	FBgn0052845	CG32845	CG32845	1.21	0.242591	0.999395	0	-1.03	0.851884	0.996946	0	-1.19	0.279194	0.723725	0	-1.88	0.000202	0.008685	1	-2.4	1e-06	7.1e-05	1	-2.23	5e-06	0.000215	1	-2.11	1.6e-05	0.000639	1	-2.36	1e-06	6.4e-05	1	-2.36	1e-06	5.1e-05	1	-3.01	0	0	1	-1.93	0.000116	0.002362	1	1
1	FBgn0033728	Cuticular protein 49Ae	Cpr49Ae	-1.1	0.490755	0.999395	0	-1.47	0.005017	0.297902	0	-1.53	0.001884	0.058548	0	-1.74	8.3e-05	0.004321	1	-1.95	4e-06	0.000248	1	-1.72	0.000117	0.003169	1	-1.83	2.5e-05	0.000928	1	-1.97	3e-06	0.000125	1	-2.22	0	6e-06	1	-2.04	1e-06	4.2e-05	1	-2.05	1e-06	4.2e-05	1	1
1	FBgn0052483	CG32483	CG32483	1.09	0.61589	0.999395	0	-1.08	0.669862	0.988335	0	-1.49	0.022576	0.26077	0	-1.94	0.000258	0.010425	1	-2.07	7.2e-05	0.002779	1	-1.95	0.000233	0.005601	1	-2.07	7e-05	0.002251	1	-2.08	6.2e-05	0.001732	1	-2.3	8e-06	0.000264	1	-2.42	3e-06	8.7e-05	1	-2.06	7.7e-05	0.001707	1	1
1	FBgn0036015	CG3088	CG3088	1.21	0.253204	0.999395	0	-1.26	0.172297	0.950325	0	-1.55	0.010152	0.168705	0	-1.85	0.000441	0.015886	1	-2.24	8e-06	0.000476	1	-2.02	7.3e-05	0.002153	1	-1.77	0.00097	0.019472	1	-1.88	0.000303	0.006346	1	-2.16	1.7e-05	0.000502	1	-1.7	0.002065	0.022569	1	-2.14	2.2e-05	0.000593	1	1
1	FBgn0039311	CG10513	CG10513	1.03	0.808026	0.999395	0	-1.2	0.110654	0.921613	0	-1.49	0.000609	0.02697	0	-2.49	0	0	1	-2.62	0	0	1	-2.05	0	2e-06	1	-1.93	0	1.2e-05	1	-1.83	1e-06	4.9e-05	1	-2.52	0	0	1	-2.48	0	0	1	-2.19	0	0	1	1
1	FBgn0010425	epsilonTrypsin	epsilonTry	1.26	0.131023	0.999395	0	1.08	0.621335	0.988335	0	-1.26	0.134127	0.567237	0	-1.97	3.5e-05	0.002225	1	-2.2	2e-06	0.000163	1	-1.68	0.001136	0.020012	1	-1.91	7.1e-05	0.002288	1	-1.83	0.000186	0.004252	1	-2.26	1e-06	5.3e-05	1	-2.92	0	0	1	-2.31	1e-06	3e-05	1	1
1	FBgn0036738	CG7542	CG7542	1.14	0.400652	0.999395	0	1.04	0.771071	0.990997	0	-1.23	0.174672	0.612345	0	-1.81	0.000676	0.021835	1	-2.19	1.5e-05	0.000774	1	-2.23	1e-05	0.000389	1	-2.25	2e-06	8.3e-05	1	-2.27	1e-06	6.1e-05	1	-2.59	0	3e-06	1	-2.87	0	0	1	-2.42	0	1.3e-05	1	1
1	FBgn0051104	CG31104	CG31104	1.05	0.752173	0.999395	0	-1.41	0.042232	0.734305	0	-1.33	0.086925	0.485679	0	-2.15	1.9e-05	0.001394	1	-2.87	0	4e-06	1	-2.39	2e-06	9.9e-05	1	-2.23	9e-06	0.000382	1	-2.53	4e-06	0.000155	1	-2.48	1e-06	3.7e-05	1	-3.24	0	0	1	-2.43	1e-06	4.9e-05	1	1
1	FBgn0031141	CG1304	CG1304	1.18	0.304219	0.999395	0	-1.2	0.257512	0.964139	0	-1.52	0.011416	0.180475	0	-1.94	0.00011	0.005536	1	-2.21	6e-06	0.00036	1	-1.84	0.000337	0.007568	1	-2.25	4e-06	0.000199	1	-2.74	0	2.5e-05	1	-2.39	1e-06	4.5e-05	1	-3.09	0	0	1	-2.49	0	1.8e-05	1	1
1	FBgn0032913	CG9259	CG9259	1.29	0.004148	0.670117	0	1.01	0.877247	0.997504	0	-1.22	0.022599	0.260812	0	-1.87	0	0	1	-1.96	0	0	1	-1.88	0	0	1	-1.97	0	0	1	-2.31	0	0	1	-2.41	0	0	1	-2.56	0	0	1	-2.52	0	0	1	1
1	FBgn0032652	CG6870	CG6870	-1.12	0.484068	0.999395	0	-1.04	0.818887	0.994557	0	-1.66	0.003482	0.086515	0	-2.06	5.5e-05	0.003139	1	-2.66	0	2.1e-05	1	-1.91	0.000244	0.005809	1	-1.83	0.000586	0.012805	1	-2.42	2e-06	8.2e-05	1	-2.63	0	1.3e-05	1	-3.29	0	0	1	-2.53	1e-06	2.6e-05	1	1
1	FBgn0032066	CG9463	CG9463	1.12	0.456147	0.999395	0	-1.33	0.077189	0.874848	0	-1.15	0.385694	0.789315	0	-1.95	7.1e-05	0.003793	1	-1.85	0.00023	0.007254	1	-1.62	0.002989	0.042021	1	-1.8	0.000422	0.009946	1	-1.9	0.000133	0.00324	1	-2.82	0	1e-06	1	-2.21	5e-06	0.000139	1	-2.56	0	7e-06	1	1
1	FBgn0033027	Troponin C isoform 4	TpnC4	1.1	0.643916	0.999395	0	-1.59	0.02811	0.631639	0	-1.7	0.011755	0.182868	0	-2.01	0.001202	0.034277	1	-2.63	1.5e-05	0.000774	1	-2.37	9.3e-05	0.002627	1	-2.27	0.000188	0.005156	1	-2.77	6e-06	0.000239	1	-3.28	0	1.5e-05	1	-2.97	2e-06	5.9e-05	1	-2.6	1.8e-05	0.000511	1	1
1	FBgn0011555	thetaTrypsin	thetaTry	1.12	0.40984	0.999395	0	-1.17	0.266782	0.964139	0	-1.57	0.002242	0.065348	0	-1.86	5.2e-05	0.00305	1	-1.87	4.2e-05	0.001817	1	-1.91	2.7e-05	0.000916	1	-1.79	0.000124	0.003647	1	-2.48	0	2e-06	1	-2.2	1e-06	3.3e-05	1	-2.63	0	0	1	-2.67	0	0	1	1
1	FBgn0033932	Diuretic hormone 44 receptor 1	Dh44-R1	1.16	0.108384	0.999395	0	-1.01	0.939609	0.997504	0	-1.24	0.025846	0.279162	0	-1.54	2.2e-05	0.001535	1	-1.82	0	4e-06	1	-1.7	0	2.4e-05	1	-1.77	0	7e-06	1	-2.09	0	0	1	-2.76	0	0	1	-2.92	0	0	1	-2.75	0	0	1	1
1	FBgn0032303	CG6508	CG6508	1.02	0.905066	0.999395	0	1.09	0.653668	0.988335	0	-1.3	0.219691	0.666323	0	-2.19	0.00015	0.006824	1	-2.29	6.8e-05	0.00267	1	-1.97	0.000836	0.015735	1	-2.22	0.000114	0.003425	1	-2.32	5.2e-05	0.001489	1	-3.25	0	5e-06	1	-2.58	8e-06	0.000212	1	-2.99	0	2.1e-05	1	1
1	FBgn0036022	CG8329	CG8329	1.29	0.186387	0.999395	0	1	0.991156	0.998783	0	-1.46	0.05226	0.396261	0	-1.89	0.001468	0.039962	1	-2.8	1e-06	8.9e-05	1	-2.07	0.00031	0.007065	1	-2.26	6.9e-05	0.002219	1	-2.27	6.2e-05	0.001736	1	-2.81	1e-06	4.6e-05	1	-2.68	3e-06	8.7e-05	1	-3.03	0	1.3e-05	1	1
1	FBgn0039471	CG6295	CG6295	1.25	0.133726	0.999395	0	1.03	0.845796	0.996946	0	-1.31	0.073114	0.456471	0	-2.39	0	3.6e-05	1	-2.48	0	9e-06	1	-2.38	2e-06	8e-05	1	-2.93	0	0	1	-3.04	0	0	1	-3.22	0	0	1	-2.87	0	0	1	-3.08	0	0	1	1
1	FBgn0039312	CG10514	CG10514	1.1	0.41895	0.999395	0	-1.1	0.421625	0.97412	0	-1.43	0.003149	0.081485	0	-2.45	0	0	1	-2.32	0	2e-06	1	-2.21	0	1e-06	1	-1.96	0	2e-05	1	-2.07	0	3e-06	1	-2.63	0	0	1	-2.78	0	0	1	-3.1	0	0	1	1
1	FBgn0034143	CG8303	CG8303	-1	0.999073	0.999838	0	-1.13	0.282185	0.968329	0	-1.32	0.014208	0.203136	0	-1.78	2e-06	0.000269	1	-1.88	0	3.3e-05	1	-1.64	2.9e-05	0.000985	1	-1.82	1e-06	5.7e-05	1	-2.25	0	0	1	-2.56	0	0	1	-2.77	0	0	1	-3.1	0	0	1	1
1	FBgn0029966	Ionotropic receptor 7c	Ir7c	-1.25	0.101717	0.999395	0	-1.14	0.330412	0.968993	0	-1.16	0.257019	0.70415	0	-1.95	2.6e-05	0.001734	1	-1.87	1.8e-05	0.00092	1	-2.84	0	0	1	-2.04	2e-06	8.8e-05	1	-2.8	0	0	1	-3.51	0	0	1	-2.35	0	2e-06	1	-3.13	0	0	1	1
1	FBgn0038011	CG4066	CG4066	-1.2	0.273988	0.999395	0	-1.36	0.069887	0.860982	0	-1.65	0.004089	0.095647	0	-1.97	0.000173	0.00769	1	-1.81	0.000831	0.020369	1	-2.08	5.8e-05	0.001746	1	-2.55	1e-06	4.6e-05	1	-3.05	0	1e-06	1	-3.22	0	0	1	-2.62	0	1.7e-05	1	-3.14	0	0	1	1
1	FBgn0035768	CG14834	CG14834	-1.1	0.37842	0.999395	0	-1.07	0.560533	0.984159	0	-1.46	0.000951	0.036126	0	-1.72	5e-06	0.00047	1	-2.11	0	1e-06	1	-2.28	0	0	1	-2.37	0	0	1	-2.51	0	0	1	-2.97	0	0	1	-2.71	0	0	1	-3.15	0	0	1	1
1	FBgn0000427	defective chorion 1	2009-12-01	1.13	0.396308	0.999395	0	-1.15	0.304464	0.968665	0	-1.57	0.001838	0.057949	0	-1.9	1.9e-05	0.001385	1	-2.29	0	1.7e-05	1	-1.85	3.9e-05	0.001259	1	-2.13	1e-06	5.8e-05	1	-2.47	0	2e-06	1	-2.67	0	0	1	-2.82	0	0	1	-3.18	0	0	1	1
1	FBgn0051928	CG31928	CG31928	1.05	0.781698	0.999395	0	-1.3	0.169455	0.949455	0	-1.41	0.072139	0.4535	0	-1.87	0.001678	0.044323	1	-1.82	0.002472	0.048323	1	-2.24	7.8e-05	0.002259	1	-2.01	0.000504	0.011493	1	-3.04	2e-06	9.2e-05	1	-2.86	1e-06	3.6e-05	1	-2.79	1e-06	4.6e-05	1	-3.33	0	2e-06	1	1
1	FBgn0003358	Jonah 99Ci	Jon99Ci	1.12	0.427963	0.999395	0	-1.22	0.162678	0.949455	0	-1.22	0.162416	0.600043	0	-2.14	2e-06	0.000223	1	-2.65	0	1e-06	1	-2.41	0	6e-06	1	-2.65	0	1e-06	1	-2.52	0	2e-06	1	-3.36	0	0	1	-3.19	0	0	1	-3.47	0	0	1	1
1	FBgn0035289	CG12026	CG12026	1.04	0.743853	0.999395	0	-1.05	0.704013	0.988335	0	-1.3	0.03077	0.308289	0	-1.74	2.3e-05	0.001545	1	-2.27	0	1e-06	1	-2.03	0	1.4e-05	1	-1.99	3e-06	0.000132	1	-2.29	0	0	1	-3.5	0	0	1	-3.71	0	0	1	-3.47	0	0	1	1
1	FBgn0031755	palisade	psd	1.23	0.178169	0.999395	0	1.01	0.961468	0.99777	0	-1.27	0.120902	0.546942	0	-1.91	6.8e-05	0.003683	1	-2.16	4e-06	0.000238	1	-1.7	0.000844	0.015787	1	-2.06	1.1e-05	0.000463	1	-2.03	1.5e-05	0.000519	1	-2.92	0	0	1	-3.7	0	0	1	-3.6	0	0	1	1
1	FBgn0031111	Odorant-binding protein 19c	Obp19c	-1.08	0.560328	0.999395	0	1.12	0.380098	0.97412	0	-1.22	0.134563	0.567682	0	-1.68	0.000256	0.010386	1	-2.01	2e-06	0.000151	1	-2.46	0	1e-06	1	-2.65	0	0	1	-2.52	0	0	1	-3.77	0	0	1	-3.64	0	0	1	-3.63	0	0	1	1
1	FBgn0014465	Chorion protein b at 7F	Cp7Fb	-1.03	0.782713	0.999395	0	-1.02	0.872537	0.997504	0	-1.34	0.012872	0.19383	0	-1.73	1.4e-05	0.001071	1	-2.08	0	5e-06	1	-2.15	0	1e-06	1	-2.42	0	0	1	-2.17	0	1e-06	1	-3.03	0	0	1	-3.02	0	0	1	-3.72	0	0	1	1
1	FBgn0035697	CG10163	CG10163	-1.17	0.341909	0.999395	0	1.02	0.919123	0.997504	0	-1.12	0.489115	0.846082	0	-2.11	2.3e-05	0.001544	1	-2.43	1e-06	8.2e-05	1	-2.59	0	1.5e-05	1	-2.25	6e-06	0.000249	1	-2.74	0	5e-06	1	-2.78	0	3e-06	1	-3.23	0	0	1	-3.95	0	0	1	1
1	FBgn0031754	Vitelline membrane 26Aac	Vm26Ac	-1.18	0.356176	0.999395	0	-1.02	0.925388	0.997504	0	-1.39	0.10026	0.510228	0	-1.9	0.000685	0.021991	1	-2.34	1.4e-05	0.000751	1	-1.89	0.000792	0.015084	1	-2.28	2.4e-05	0.00091	1	-3.13	0	3e-06	1	-3.61	0	0	1	-3.44	0	0	1	-4.02	0	0	1	1
2	FBgn0001128	Glycerol 3 phosphate dehydrogenase	Gpdh	1.1	0.333595	0.999395	0	-1.38	0.001221	0.14078	0	-1.42	0.000469	0.023011	0	-1.65	2e-06	0.000274	1	-1.76	0	1.9e-05	1	-1.74	0	2.1e-05	1	-1.98	0	0	1	-1.87	0	1e-06	1	-2.14	0	0	1	-2.51	0	0	1	-2.07	0	0	1	2
3	FBgn0024995	CG2680	CG2680	-1	0.97677	0.999703	0	-1.34	0.035593	0.682029	0	-1.38	0.022733	0.261106	0	-1.8	6.8e-05	0.003683	1	-1.83	4.3e-05	0.00182	1	-1.63	0.000685	0.0135	1	-1.74	0.000143	0.004105	1	-1.76	0.000107	0.00274	1	-2.17	0	2.3e-05	1	-2.12	1e-06	3.4e-05	1	-1.53	0.002777	0.031202	1	3
3	FBgn0039897	CG1674	CG1674	-1.06	0.543052	0.999395	0	-1.34	0.002411	0.204189	0	-1.43	0.00074	0.030458	0	-1.6	3e-06	0.000344	1	-1.53	2.3e-05	0.001101	1	-1.59	5e-06	0.000215	1	-1.56	1.1e-05	0.000463	1	-1.62	3e-06	0.000112	1	-1.54	1.7e-05	0.000502	1	-1.52	3.1e-05	0.000732	1	-1.6	4e-06	0.000139	1	3
3	FBgn0030594	CG9509	CG9509	-1.07	0.469685	0.999395	0	-1.29	0.011844	0.43858	0	-1.23	0.037143	0.337417	0	-1.63	7e-06	0.000582	1	-1.97	0	1e-06	1	-1.58	1.9e-05	0.000671	1	-1.59	1.5e-05	0.000617	1	-1.71	1e-06	6e-05	1	-1.92	0	1e-06	1	-1.7	2e-06	5.3e-05	1	-1.61	1.1e-05	0.000315	1	3
3	FBgn0050084	Z band alternatively spliced PDZ-motif protein 52	Zasp52	-1.06	0.381074	0.999395	0	-1.35	8e-06	0.003794	0	-1.5	0	1.1e-05	0	-1.56	0	0	1	-1.51	0	2e-06	1	-1.57	0	0	1	-1.57	0	0	1	-1.74	0	0	1	-1.64	0	0	1	-1.64	0	0	1	-1.65	0	0	1	3
3	FBgn0052827	CG32827	CG32827	1.15	0.249727	0.999395	0	-1.02	0.844302	0.996946	0	-1.24	0.07603	0.463121	0	-1.54	0.000592	0.019649	1	-1.61	0.00017	0.005599	1	-1.78	1e-05	0.000404	1	-1.55	0.000495	0.011312	1	-1.81	6e-06	0.000225	1	-1.79	8e-06	0.000254	1	-1.62	0.000158	0.002879	1	-1.79	3.9e-05	0.000946	1	3
3	FBgn0038985	james bond	bond	1.21	0.055912	0.999395	0	-1.25	0.028071	0.631639	0	-1.46	0.000331	0.017542	0	-1.7	1e-06	0.000185	1	-2.02	0	0	1	-1.57	2.8e-05	0.000945	1	-1.6	1.4e-05	0.000579	1	-1.91	0	1e-06	1	-2.23	0	0	1	-2.19	0	0	1	-1.86	0	3e-06	1	3
3	FBgn0032727	CG10623	CG10623	-1.09	0.413965	0.999395	0	-1.17	0.158886	0.949455	0	-1.42	0.002007	0.060483	0	-1.73	5e-06	0.000435	1	-1.94	0	1.1e-05	1	-1.58	8.1e-05	0.002339	1	-1.59	7.4e-05	0.002347	1	-1.77	2e-06	9.1e-05	1	-2.13	0	0	1	-2.41	0	0	1	-1.87	0	1.5e-05	1	3
3	FBgn0040060	yippee interacting protein 7	yip7	1.14	0.285945	0.999395	0	1.08	0.544465	0.984159	0	-1.2	0.149537	0.585426	0	-1.65	0.000183	0.008064	1	-1.75	3.8e-05	0.001677	1	-1.52	0.001371	0.023318	1	-1.86	7e-06	0.000306	1	-1.76	3.2e-05	0.000978	1	-2.02	1e-06	2.8e-05	1	-2.26	0	1e-06	1	-1.88	5e-06	0.000151	1	3
3	FBgn0050042	Cuticular protein 49Ab	Cpr49Ab	-1.14	0.280581	0.999395	0	-1.17	0.207525	0.957756	0	-1.49	0.001837	0.057949	0	-1.57	0.00048	0.016861	1	-1.63	0.00018	0.005901	1	-1.51	0.001224	0.021314	1	-1.63	0.000166	0.004643	1	-1.76	2.1e-05	0.000697	1	-2	0	2e-05	1	-2.27	0	1e-06	1	-1.91	2e-06	6.1e-05	1	3
3	FBgn0039330	CG11909	CG11909	-1.13	0.257417	0.999395	0	-1.28	0.019745	0.572107	0	-1.36	0.004008	0.095098	0	-1.8	0	7e-05	1	-1.83	0	2.5e-05	1	-1.62	2e-05	0.000685	1	-1.66	8e-06	0.000349	1	-1.73	2e-06	8.5e-05	1	-2.19	0	0	1	-2.26	0	0	1	-1.93	0	2e-06	1	3
3	FBgn0016123	Alkaline phosphatase 4	Aph-4	1.09	0.345412	0.999395	0	-1.17	0.092821	0.906369	0	-1.39	0.000829	0.033207	0	-1.76	0	1.9e-05	1	-2.14	0	0	1	-1.6	4e-06	0.000182	1	-1.6	4e-06	0.000183	1	-1.64	2e-06	7.7e-05	1	-1.98	0	0	1	-2.07	0	0	1	-1.95	0	0	1	3
3	FBgn0039491	CG6059	CG6059	1.14	0.216619	0.999395	0	-1.1	0.37582	0.974005	0	-1.42	0.001577	0.052222	0	-1.69	3.3e-05	0.002091	1	-1.72	5e-06	0.000286	1	-1.69	8e-06	0.000334	1	-1.7	6e-06	0.000277	1	-1.76	2e-06	8.7e-05	1	-1.81	5e-06	0.000159	1	-2.06	0	4e-06	1	-1.99	0	2e-06	1	3
3	FBgn0031826	CG9550	CG9550	1.3	0.059915	0.999395	0	1.08	0.558905	0.984159	0	-1.04	0.775771	0.946844	0	-1.96	8e-06	0.000644	1	-1.71	0.000251	0.007726	1	-1.78	9.9e-05	0.00278	1	-1.66	0.000494	0.011312	1	-1.61	0.001044	0.017511	1	-2.16	1e-06	2.6e-05	1	-1.64	0.000686	0.0094	1	-2.13	1e-06	3.6e-05	1	3
3	FBgn0014076	Vitelline membrane 32E	Vm32E	-1.28	0.047292	0.999395	0	1.01	0.937855	0.997504	0	-1.22	0.105195	0.517897	0	-1.6	0.000283	0.011305	1	-1.69	5.9e-05	0.002358	1	-1.59	0.000339	0.007579	1	-1.61	0.000222	0.005838	1	-1.75	2.4e-05	0.000761	1	-2.16	0	3e-06	1	-2.22	0	1e-06	1	-2.34	0	0	1	3
5	FBgn0036232	CG14125	CG14125	1.2	0.249005	0.999395	0	-1.08	0.634533	0.988335	0	1.44	0.026579	0.28521	0	1.82	0.000409	0.015014	1	1.71	0.001372	0.030321	1	2.98	0	1e-06	1	2.82	0	2e-06	1	2.67	0	6e-06	1	1.87	0.000231	0.004474	1	1.63	0.003285	0.031701	1	3.12	0	0	1	5
5	FBgn0050090	CG30090	CG30090	1.14	0.530713	0.999395	0	1.8	0.00387	0.260617	0	1.74	0.006115	0.122168	0	2.4	3.6e-05	0.002248	1	2.34	5.7e-05	0.002309	1	3.75	0	1e-06	1	2.5	1.7e-05	0.000658	1	2.92	1e-06	5e-05	1	2.87	1e-06	5.3e-05	1	2.04	0.000552	0.007855	1	2.76	3e-06	9.9e-05	1	5
5	FBgn0001230	Heat shock protein 68	Hsp68	1.12	0.499694	0.999395	0	1.25	0.173933	0.950325	0	1.67	0.002622	0.073489	0	1.85	0.000397	0.014676	1	2.18	1.3e-05	0.000693	1	1.67	0.002721	0.039311	1	2.38	2e-06	9.8e-05	1	3.97	0	0	1	2.43	1e-06	4.8e-05	1	1.77	0.000892	0.011588	1	2.66	0	8e-06	1	5
5	FBgn0031287	CG4291	CG4291	1	0.977641	0.999703	0	1.43	0.02233	0.588232	0	1.59	0.003473	0.086515	0	2.63	0	9e-06	1	3.35	0	0	1	2.78	0	1e-06	1	2.56	0	7e-06	1	2.6	0	4e-06	1	3.41	0	0	1	3	0	0	1	2.58	0	4e-06	1	5
5	FBgn0033927	CG10102	CG10102	-1.07	0.552033	0.999395	0	1.36	0.013571	0.466269	0	1.45	0.002952	0.078542	0	1.63	0.000453	0.016129	1	1.69	4.9e-05	0.002048	1	1.8	7e-06	0.000311	1	2.08	0	8e-06	1	2.19	0	2e-06	1	2.44	0	0	1	2.06	0	6e-06	1	2.51	0	0	1	5
5	FBgn0003676	Tcp1-like	T-cp1	-1.03	0.860553	0.999395	0	1.06	0.751264	0.989815	0	1.18	0.336872	0.76298	0	1.92	0.000399	0.01471	1	2.83	0	1.6e-05	1	3.2	0	1e-06	1	2.91	0	7e-06	1	2.95	0	4e-06	1	2.71	0	1.7e-05	1	3.35	0	0	1	2.46	3e-06	0.000101	1	5
5	FBgn0053340	CG33340	CG33340	1.02	0.825171	0.999395	0	-1.12	0.24547	0.963641	0	1.38	0.002011	0.060483	0	1.57	2.7e-05	0.001783	1	1.73	1e-06	6.9e-05	1	1.84	0	6e-06	1	1.74	1e-06	4.1e-05	1	1.75	0	2.8e-05	1	1.99	0	0	1	2.19	0	0	1	2.37	0	0	1	5
5	FBgn0035076	Ance-5	Ance-5	1.08	0.512144	0.999395	0	1.06	0.618022	0.988335	0	1.42	0.003818	0.092256	0	1.61	0.000163	0.007293	1	2.05	0	1.1e-05	1	1.94	1e-06	3.1e-05	1	1.99	0	2e-05	1	2.17	0	1e-06	1	2.05	0	5e-06	1	1.89	1e-06	4.5e-05	1	2.32	0	0	1	5
5	FBgn0034761	CG4250	CG4250	-1.08	0.640854	0.999395	0	1.22	0.250628	0.964139	0	1.74	0.002136	0.06337	0	2.07	8.5e-05	0.004445	1	2.19	2.8e-05	0.001271	1	3.14	0	1e-06	1	2.8	1e-06	5.9e-05	1	2.82	0	9e-06	1	1.93	0.000319	0.005845	1	1.64	0.00539	0.045711	1	2.31	9e-06	0.000273	1	5
5	FBgn0052396	CG32396	CG32396	1.17	0.346558	0.999395	0	1.04	0.827933	0.994557	0	1.16	0.370035	0.781805	0	1.95	0.000122	0.00594	1	2.75	0	8e-06	1	3.17	0	0	1	2.29	4e-06	0.000195	1	2.65	0	9e-06	1	2.42	1e-06	4.9e-05	1	3.22	0	0	1	2.28	4e-06	0.000148	1	5
5	FBgn0014143	crocodile	croc	1.06	0.661203	0.999395	0	1.03	0.800493	0.99325	0	1.24	0.113023	0.533727	0	1.97	3e-06	0.000348	1	2.59	0	0	1	3.07	0	0	1	2.6	0	0	1	2.85	0	0	1	2.61	0	0	1	2.87	0	0	1	2.25	0	5e-06	1	5
5	FBgn0023479	Tequila	Tequila	1.14	0.155638	0.999395	0	1.12	0.213846	0.957756	0	1.47	0.000103	0.007402	0	1.51	4.2e-05	0.002583	1	1.62	3e-06	0.000183	1	1.7	0	2.4e-05	1	1.59	5e-06	0.000243	1	1.82	0	2e-06	1	1.87	0	1e-06	1	1.86	0	1e-06	1	2.17	0	0	1	5
5	FBgn0032639	CG18563	CG18563	1.05	0.699109	0.999395	0	1.09	0.54626	0.984159	0	1.17	0.251461	0.698691	0	2.11	1e-06	0.000128	1	1.77	9.3e-05	0.003487	1	2.05	2e-06	0.000107	1	2.02	3e-06	0.000151	1	2.62	0	0	1	2.55	0	0	1	1.83	3.7e-05	0.000848	1	2.06	2e-06	6.2e-05	1	5
5	FBgn0028495	CG18616	CG18616	-1.05	0.793632	0.999395	0	1.04	0.8062	0.994329	0	1.19	0.32227	0.75395	0	1.81	0.001501	0.040253	1	2.38	9e-06	0.000482	1	3.03	0	5e-06	1	2.74	0	3.3e-05	1	2.65	1e-06	5.1e-05	1	2.64	1e-06	4.5e-05	1	2.54	2e-06	7.7e-05	1	2.05	0.000161	0.00306	1	5
5	FBgn0039323	CG10559	CG10559	1.24	0.197352	0.999395	0	1.07	0.678321	0.988335	0	1.15	0.372238	0.782191	0	1.66	0.001495	0.040178	1	2.43	0	2.5e-05	1	3.27	0	0	1	2.5	0	1.1e-05	1	2.51	0	8e-06	1	2.26	1e-06	5.8e-05	1	2.76	0	1e-06	1	2.01	2.4e-05	0.00062	1	5
5	FBgn0003270	absent MD neurons and olfactory sensilla	amos	1.14	0.406517	0.999395	0	1.36	0.061189	0.825859	0	1.55	0.008283	0.150393	0	2.7	0	7.5e-05	1	2.65	0	1.2e-05	1	2.25	4e-06	0.000191	1	2.81	0	2e-06	1	2.5	0	2.1e-05	1	3.33	0	0	1	2.35	2e-06	5.5e-05	1	2	0.000195	0.003606	1	5
5	FBgn0038329	CG34404	CG34404	-1.09	0.416482	0.999395	0	-1.04	0.697422	0.988335	0	1.01	0.944125	0.986316	0	1.7	1.1e-05	0.0009	1	2.04	0	3e-06	1	2.43	0	0	1	1.77	3e-06	0.000137	1	1.84	1e-06	4.1e-05	1	1.68	1.7e-05	0.000502	1	2.17	0	0	1	1.96	0	5e-06	1	5
5	FBgn0035101	p130CAS	p130CAS	1.02	0.836916	0.999395	0	-1.11	0.343844	0.969629	0	1.01	0.919099	0.986316	0	1.55	0.000187	0.008223	1	2.19	0	0	1	2.7	0	0	1	1.98	0	6e-06	1	1.99	0	3e-06	1	1.69	1.2e-05	0.000357	1	2.16	0	0	1	1.87	0	1.8e-05	1	5
8	FBgn0034680	CG34370	CG34370	1.02	0.971298	0.999703	0	1.3	0.3914	0.97412	0	1.55	0.151217	0.586704	0	4.39	8e-06	0.000688	1	7.66	0	2e-06	1	8.13	0	1e-06	1	8.19	0	1e-06	1	6.52	0	5e-06	1	6.5	0	4e-06	1	7.33	0	1e-06	1	7.04	0	2e-06	1	8
8	FBgn0051397	CG31397	CG31397	1.45	0.090435	0.999395	0	1.54	0.051159	0.769463	0	1.77	0.010842	0.174866	0	3.91	0	1.1e-05	1	5.41	0	0	1	7.11	0	0	1	5.15	0	0	1	6.67	0	0	1	6.44	0	0	1	6.07	0	0	1	4.15	0	1e-06	1	8
8	FBgn0028642	espinas	esn	1.26	0.285093	0.999395	0	1.17	0.459721	0.977521	0	1.57	0.040596	0.350575	0	3.04	3e-06	0.000296	1	5.41	0	0	1	5.77	0	0	1	4.92	0	0	1	5.46	0	0	1	5.14	0	0	1	7	0	0	1	4	0	1e-06	1	8
8	FBgn0027584	CG4757	CG4757	1.35	0.182843	0.999395	0	2.11	0.001403	0.153699	0	2.01	0.002736	0.074882	0	2.64	5.3e-05	0.003099	1	3.6	0	3.4e-05	1	4.63	0	1e-06	1	4.27	0	2e-06	1	4.7	0	0	1	5.82	0	0	1	2.13	0.001265	0.015383	1	3.52	1e-06	2.2e-05	1	8
8	FBgn0034680	CG34370	CG34370	-1.13	0.639065	0.999395	0	1.3	0.320894	0.968964	0	1.31	0.309254	0.742085	0	3.13	6.3e-05	0.003445	1	5.27	0	6e-06	1	5.18	0	5e-06	1	4.18	1e-06	6.6e-05	1	5.35	0	3e-06	1	4.6	0	1.6e-05	1	4.77	0	8e-06	1	3.3	3.1e-05	0.000778	1	8
0	FBgn0034201	CG17290	CG17290	-2.17	0.004566	0.670117	0	-1.1	0.725605	0.988753	0	-4.16	1e-06	0.000248	1	-1.54	0.104923	0.538547	0	-3.05	7.9e-05	0.003038	1	-3.54	1.1e-05	0.000418	1	-3	9.7e-05	0.002993	1	-5.27	0	3e-06	1	-4.26	1e-06	3.6e-05	1	-4.26	1e-06	3.1e-05	1	-3.68	6e-06	0.000199	1	0
0	FBgn0034204	CG10953	CG10953	-1.18	0.47142	0.999395	0	-1.02	0.94067	0.997504	0	-2.94	1.4e-05	0.001542	1	-1.62	0.036623	0.319233	0	-3.71	0	3.2e-05	1	-4.5	0	1e-06	1	-3.52	5e-06	0.000216	1	-5.67	0	0	1	-4.92	0	0	1	-4.81	0	0	1	-5.1	0	0	1	0
0	FBgn0052453	CG32453	CG32453	-2.1	0.019187	0.957371	0	-1.08	0.773511	0.991497	0	-3.02	0.000248	0.014241	1	-1.51	0.181545	0.663608	0	-3.66	2.7e-05	0.001258	1	-4.91	1e-06	4.5e-05	1	-3.09	0.000193	0.005252	1	-6.52	2e-05	0.000673	1	-6.58	1.9e-05	0.000546	1	-3.33	0.000964	0.012385	1	-5.75	6e-06	0.000189	1	0
0	FBgn0042118	Cuticular protein 65Ax2	Cpr65Ax2	-1.82	0.008115	0.802165	0	-1.09	0.686943	0.988335	0	-2.76	2.2e-05	0.002172	1	-1.58	0.041048	0.33924	0	-4.88	0	0	1	-4.34	0	1e-06	1	-3.52	0	2.7e-05	1	-7.17	0	0	1	-5.43	0	0	1	-4.92	0	0	1	-5.77	0	0	1	0
0	FBgn0020637	Lcp65Ag2	Lcp65Ag2	-1.94	0.006768	0.791949	0	-1.18	0.491726	0.979947	0	-3.75	1e-06	0.000164	1	-1.99	0.004921	0.094437	0	-5.61	0	0	1	-6.64	0	0	1	-4.13	0	1.1e-05	1	-10.63	0	0	1	-9.37	0	0	1	-7.9	0	0	1	-9.06	0	0	1	0
0	FBgn0039434	TweedleM	TwdlM	-2.96	0.000379	0.298248	0	-1.29	0.378146	0.97412	0	-3.67	3.1e-05	0.002863	1	-1.9	0.029242	0.278028	0	-6.27	0	5e-06	1	-9.58	0	0	1	-5.39	0	1.8e-05	1	-13.87	0	0	1	-17.68	0	0	1	-11.16	0	0	1	-14.65	0	0	1	0
0	FBgn0020638	Lcp65Ag1	Lcp65Ag1	-2.82	0.002895	0.624502	0	-1.14	0.687648	0.988335	0	-4.44	3.7e-05	0.003295	1	-2.26	0.01743	0.207723	0	-9.26	0	2e-06	1	-11.52	0	0	1	-5.75	2e-06	0.000117	1	-22.63	0	0	1	-15.62	0	0	1	-8.43	0	2e-06	1	-16.65	0	0	1	0
1	FBgn0039441	TweedleN	TwdlN	-1.24	0.184311	0.999395	0	-1.03	0.84107	0.996665	0	-1.96	9.9e-05	0.00719	1	-1.31	0.096965	0.521524	0	-1.92	0.000145	0.004862	1	-2.06	3.5e-05	0.001131	1	-1.9	0.000194	0.005291	1	-2.1	2.1e-05	0.000695	1	-1.92	0.000153	0.003115	1	-1.82	0.000426	0.006385	1	-1.89	0.000215	0.003884	1	1
1	FBgn0042120	Lcp65Ag3	Lcp65Ag3	-1.54	0.03145	0.968176	0	-1.17	0.427992	0.97412	0	-2.6	9e-06	0.001106	1	-1.45	0.063188	0.421586	0	-2.12	0.000305	0.009064	1	-2.62	7e-06	0.000308	1	-2.36	4.6e-05	0.001565	1	-3.68	0	9e-06	1	-2.52	1.5e-05	0.000451	1	-3	1e-06	2.3e-05	1	-2.75	3e-06	0.000104	1	1
2	FBgn0032538	CG16885	CG16885	-1.41	0.019549	0.957371	0	-1.28	0.090492	0.902669	0	-1.99	1.1e-05	0.001282	1	-1.57	0.002475	0.058514	0	-2.66	0	1e-06	1	-3.04	0	0	1	-2.14	2e-06	8.9e-05	1	-3.63	0	0	1	-2.69	0	0	1	-2.7	0	0	1	-3.22	0	0	1	2
3	FBgn0003507	serpent	srp	-1.17	0.187076	0.999395	0	-1.11	0.362029	0.972321	0	-1.58	0.000193	0.011757	1	-1.12	0.328972	0.799323	0	-1.68	3.4e-05	0.001498	1	-1.6	0.000134	0.003518	1	-1.64	6e-05	0.00197	1	-1.82	3e-06	0.000115	1	-1.69	2.5e-05	0.000698	1	-1.62	8.4e-05	0.001679	1	-1.6	0.000122	0.002462	1	3
3	FBgn0038469	CG4009	CG4009	-1.04	0.683086	0.999395	0	-1.34	0.006343	0.336208	0	-1.61	1.8e-05	0.001859	1	-1.46	0.000442	0.015886	0	-1.61	1.9e-05	0.000938	1	-1.63	1.3e-05	0.000493	1	-1.77	1e-06	4.3e-05	1	-1.91	0	3e-06	1	-1.91	0	3e-06	1	-1.89	0	3e-06	1	-1.76	1e-06	3.4e-05	1	3
7	FBgn0043841	virus-induced RNA 1	vir-1	1.2	0.281685	0.999395	0	1.29	0.108049	0.92052	0	1.82	0.000297	0.016469	1	1.4	0.035401	0.311906	0	1.75	0.000637	0.01649	1	2.77	0	2e-06	1	2.73	0	2e-06	1	3.21	0	0	1	2.17	6e-06	0.000204	1	1.96	6.2e-05	0.00131	1	2.59	0	5e-06	1	7
8	FBgn0000277	Cecropin A2	CecA2	-1.18	0.527325	0.999395	0	1.08	0.749852	0.989815	0	2.74	0.000692	0.029349	1	2.28	0.001967	0.050017	0	3.28	1.8e-05	0.000915	1	4.6	0	1e-05	1	4.33	0	2.5e-05	1	3.76	3e-06	0.000116	1	3.13	3.5e-05	0.000906	1	3.31	1.6e-05	0.000414	1	4.18	1e-06	2.4e-05	1	8
0	FBgn0052523	CG32523	CG32523	1.14	0.63637	0.999395	0	-1.52	0.145166	0.946789	0	-2.01	0.017454	0.225814	0	-2.39	0.003364	0.072961	0	-3.11	0.000187	0.006098	1	-2.67	0.001055	0.018845	1	-3.14	0.000169	0.004704	1	-2.95	0.000343	0.007037	1	-4.21	5e-06	0.000161	1	-2.74	0.000804	0.010687	1	-3.41	0.000262	0.004554	1	0
0	FBgn0039778	Jonah 99Fi	Jon99Fi	1.26	0.354543	0.999395	0	-1.31	0.277707	0.968329	0	-1.51	0.101066	0.512347	0	-1.66	0.047878	0.364064	0	-2.29	0.001557	0.0336	1	-2.6	0.000319	0.007245	1	-3.99	1e-06	4.6e-05	1	-2.73	0.000168	0.003904	1	-3.88	1e-06	4.8e-05	1	-4.44	0	7e-06	1	-3.71	2e-06	7.8e-05	1	0
0	FBgn0032127	CG13114	CG13114	-1.21	0.201765	0.999395	0	1.11	0.497734	0.981307	0	-1.44	0.017411	0.225487	0	-1.53	0.005891	0.106045	0	-2.02	1.5e-05	0.000764	1	-3.08	0	0	1	-2.59	0	3e-06	1	-4.17	0	0	1	-4.26	0	0	1	-4.24	0	0	1	-3.77	0	0	1	0
0	FBgn0039754	CG9747	CG9747	1.01	0.955039	0.999703	0	-1.13	0.413892	0.97412	0	-1.34	0.044759	0.365765	0	-1.58	0.002324	0.056573	0	-2.07	4e-06	0.000272	1	-2.34	0	1.3e-05	1	-2.84	0	0	1	-3.23	0	0	1	-3.76	0	0	1	-5.19	0	0	1	-3.8	0	0	1	0
0	FBgn0000356	Chorion protein 16	Cp16	-1.29	0.174567	0.999395	0	1.05	0.795397	0.99325	0	1.07	0.717239	0.928668	0	-1.46	0.04753	0.362792	0	-2.02	0.000368	0.010539	1	-3.15	0	6e-06	1	-3.99	0	0	1	-2.68	2e-06	9.2e-05	1	-5.16	0	0	1	-4.33	0	0	1	-4.04	0	0	1	0
0	FBgn0036605	CG13041	CG13041	-1.41	0.172331	0.999395	0	-1.01	0.949189	0.99777	0	-1.87	0.007871	0.144704	0	-1.65	0.032063	0.29577	0	-3.18	2.4e-05	0.001148	1	-4.2	0	6e-06	1	-3.04	4.4e-05	0.001507	1	-4.3	3.6e-05	0.001101	1	-4.6	0	8e-06	1	-3.09	3.6e-05	0.000835	1	-4.08	1e-06	3.2e-05	1	0
0	FBgn0029697	CG15570	CG15570	-1.08	0.623076	0.999395	0	1.11	0.489296	0.979862	0	-1.38	0.038865	0.344015	0	-1.58	0.003946	0.082135	0	-2.32	1e-06	7.1e-05	1	-3.34	0	0	1	-3.17	0	0	1	-3.55	0	0	1	-4.41	0	0	1	-4.61	0	0	1	-4.14	0	0	1	0
0	FBgn0037013	CG13250	CG13250	-1.37	0.09083	0.999395	0	1.06	0.735507	0.989139	0	1	0.98361	0.996892	0	-1.53	0.02502	0.255747	0	-2.31	3e-05	0.001355	1	-3.22	0	4e-06	1	-3.02	0	1.2e-05	1	-2.61	7.5e-05	0.002051	1	-4.45	0	0	1	-3.93	0	0	1	-4.32	0	0	1	0
0	FBgn0000360	Chorion protein 38	Cp38	-1.24	0.198311	0.999395	0	-1.04	0.807234	0.994329	0	-1.21	0.257746	0.704967	0	-1.68	0.002297	0.056238	0	-2.26	6e-06	0.000335	1	-3.2	0	0	1	-2.63	0	1.5e-05	1	-3.54	0	0	1	-4.45	0	0	1	-4.93	0	0	1	-4.59	0	0	1	0
0	FBgn0032788	CG13084	CG13084	-1.1	0.617896	0.999395	0	1.05	0.79114	0.99325	0	-1.22	0.293993	0.732258	0	-1.62	0.011836	0.161065	0	-2.12	0.000166	0.005473	1	-3.24	0	4e-06	1	-3.83	0	0	1	-3.16	0	5e-06	1	-6.78	0	0	1	-4.55	0	0	1	-4.7	0	0	1	0
0	FBgn0032126	CG13113	CG13113	-1.38	0.114182	0.999395	0	-1.01	0.958446	0.99777	0	-1.42	0.08431	0.479974	0	-1.82	0.004285	0.086267	0	-2.8	4e-06	0.000231	1	-3.14	0	2.8e-05	1	-3	1e-06	5.9e-05	1	-4.7	0	0	1	-5.73	0	0	1	-5.19	0	0	1	-4.8	0	0	1	0
0	FBgn0032789	CG13083	CG13083	-1.02	0.904945	0.999395	0	-1.12	0.55022	0.984159	0	-1.35	0.116389	0.539239	0	-1.77	0.003405	0.073502	0	-2.54	6e-06	0.000352	1	-3.39	0	2e-06	1	-4.17	0	0	1	-3.31	0	3e-06	1	-6.09	0	0	1	-5.32	0	0	1	-4.9	0	0	1	0
0	FBgn0052642	CG32642	CG32642	1.14	0.467236	0.999395	0	1.1	0.603447	0.988335	0	1	0.999607	0.999759	0	-1.74	0.003579	0.075883	0	-2.85	0	3.4e-05	1	-2.89	0	1.9e-05	1	-4.45	0	0	1	-3.28	0	2e-06	1	-4.3	0	0	1	-3.98	0	0	1	-4.91	0	0	1	0
0	FBgn0000644	Follicle cell protein 3C	Fcp3C	-1.07	0.691774	0.999395	0	-1	0.983647	0.998783	0	-1.46	0.02188	0.257606	0	-1.63	0.007266	0.121054	0	-2.37	1e-06	0.000105	1	-2.62	0	1e-05	1	-3.25	0	0	1	-3.29	0	0	1	-3.91	0	0	1	-4.57	0	0	1	-4.92	0	0	1	0
0	FBgn0003980	Vitelline membrane 26Ab	Vm26Ab	1	0.98188	0.999703	0	1.1	0.547753	0.984159	0	-1.1	0.553294	0.872128	0	-1.67	0.002625	0.060649	0	-1.77	0.000861	0.02087	1	-2.23	7e-06	0.000301	1	-2.51	0	3.4e-05	1	-2.94	0	1e-06	1	-3.79	0	0	1	-5.44	0	0	1	-4.96	0	0	1	0
0	FBgn0041709	yellow-g	yellow-g	-1.15	0.350236	0.999395	0	1.21	0.199986	0.957756	0	-1.22	0.187256	0.632386	0	-1.55	0.004395	0.087398	0	-2.18	2e-06	0.000139	1	-3.52	0	0	1	-3.74	0	0	1	-3.05	0	0	1	-5.84	0	0	1	-3.9	0	0	1	-5.66	0	0	1	0
0	FBgn0041252	Femcoat	Femcoat	-1.33	0.181438	0.999395	0	-1.13	0.574326	0.985816	0	-1.18	0.442272	0.823582	0	-1.76	0.009497	0.141889	0	-2.35	0.000139	0.004766	1	-4.58	0	0	1	-5.31	0	0	1	-3.98	0	1e-06	1	-7.44	0	0	1	-7.15	0	0	1	-5.74	0	0	1	0
0	FBgn0003983	Vitelline membrane 34Ca	Vm34Ca	-1.14	0.431201	0.999395	0	1.23	0.216909	0.957756	0	-1.13	0.465887	0.836904	0	-1.62	0.00619	0.108783	0	-1.79	0.001023	0.024018	1	-2.7	0	1.6e-05	1	-2.89	0	5e-06	1	-3.22	0	0	1	-4.57	0	0	1	-6.43	0	0	1	-5.78	0	0	1	0
0	FBgn0000358	Chorion protein 19	Cp19	-1.26	0.245023	0.999395	0	1.1	0.641214	0.988335	0	1.11	0.594029	0.888846	0	-1.61	0.018065	0.21147	0	-2.12	0.000316	0.009309	1	-4.39	0	0	1	-5.89	0	0	1	-3.48	0	3e-06	1	-7.95	0	0	1	-6.61	0	0	1	-6.69	0	0	1	0
1	FBgn0030133	CG15316	CG15316	-1.07	0.33306	0.999395	0	1.02	0.808609	0.994329	0	-1.15	0.047629	0.378759	0	-1.42	4e-06	0.000354	0	-1.5	0	1.7e-05	1	-1.61	0	0	1	-1.62	0	0	1	-1.7	0	0	1	-1.7	0	0	1	-1.94	0	0	1	-1.89	0	0	1	1
1	FBgn0040609	CG3348	CG3348	-1	0.997762	0.999838	0	-1.04	0.837365	0.995254	0	-1.7	0.00962	0.164849	0	-1.55	0.029922	0.282459	0	-2.08	0.000488	0.013129	1	-1.91	0.001847	0.029071	1	-2.05	0.000628	0.013508	1	-1.92	0.001668	0.025412	1	-3.07	0	2.3e-05	1	-3.36	0	4e-06	1	-2.32	8e-05	0.001747	1	1
1	FBgn0053715	Muscle-specific protein 300	Msp-300	-1.06	0.670836	0.999395	0	-1.05	0.721058	0.98842	0	-1.22	0.127969	0.560158	0	-1.4	0.009807	0.144038	0	-1.85	9e-06	0.000494	1	-1.96	2e-06	9.4e-05	1	-2.04	1e-06	3.6e-05	1	-2.54	0	1e-06	1	-2.48	0	0	1	-2.37	0	0	1	-2.34	0	1e-06	1	1
1	FBgn0010423	Troponin C at 47D	TpnC47D	-1.5	0.026405	0.964922	0	-1.33	0.107471	0.92052	0	-1.46	0.036637	0.334668	0	-1.51	0.036283	0.317286	0	-2.2	3.8e-05	0.001677	1	-2.56	2e-06	9.8e-05	1	-2.04	0.000161	0.004535	1	-2.68	1e-06	3.7e-05	1	-2.81	2e-06	6.8e-05	1	-3.35	0	0	1	-2.63	1e-06	4.1e-05	1	1
1	FBgn0040502	CG8343	CG8343	1.14	0.549229	0.999395	0	-1.08	0.730435	0.988753	0	-1.4	0.131928	0.566495	0	-1.93	0.008005	0.128145	0	-2.89	1e-05	0.000525	1	-2.39	0.000194	0.004817	1	-2.28	0.000393	0.009322	1	-2.42	0.00016	0.003736	1	-3	5e-06	0.000175	1	-2.93	8e-06	0.000216	1	-2.65	3.7e-05	0.000903	1	1
1	FBgn0038790	Metallothionein C	MtnC	-1.03	0.888586	0.999395	0	1.42	0.085471	0.898613	0	1.3	0.188726	0.633152	0	-1.79	0.005192	0.097578	0	-2.83	3e-06	0.000191	1	-1.93	0.00171	0.027541	1	-3.14	0	3.1e-05	1	-3.17	0	2.1e-05	1	-3.85	0	5e-06	1	-3.58	0	2e-06	1	-2.69	3.2e-05	0.000799	1	1
1	FBgn0030541	CG11584	CG11584	-1.51	0.017865	0.957371	0	-1.19	0.311111	0.968665	0	-1.51	0.018408	0.232885	0	-1.34	0.090887	0.505838	0	-2.27	1e-05	0.000544	1	-2.45	2e-06	9.9e-05	1	-1.96	0.000203	0.00542	1	-2.44	2e-06	0.000101	1	-2.46	2e-06	7.1e-05	1	-2.22	1.6e-05	0.000414	1	-2.75	0	8e-06	1	1
1	FBgn0035694	CG13299	CG13299	-1.35	0.049755	0.999395	0	1.1	0.546096	0.984159	0	-1.15	0.35364	0.770911	0	-1.38	0.038496	0.328489	0	-1.77	0.000372	0.010597	1	-1.64	0.00181	0.028661	1	-2.01	2.2e-05	0.000835	1	-2.12	6e-06	0.000223	1	-2.94	0	0	1	-3.34	0	0	1	-2.8	0	0	1	1
1	FBgn0039709	Cad99C	Cad99C	1.19	0.049688	0.999395	0	-1.02	0.823944	0.994557	0	-1.38	0.000571	0.02616	0	-1.39	0.000364	0.013744	0	-1.86	0	0	1	-1.7	0	8e-06	1	-1.86	0	0	1	-2.14	0	0	1	-2.37	0	0	1	-2.16	0	0	1	-2.8	0	0	1	1
1	FBgn0051926	CG31926	CG31926	1.08	0.669833	0.999395	0	-1.07	0.713438	0.988335	0	-1.01	0.945043	0.986316	0	-1.7	0.00294	0.065532	0	-2.61	1e-06	5.5e-05	1	-2.24	1.5e-05	0.000559	1	-2.82	0	9e-06	1	-2.13	4.5e-05	0.001322	1	-2.63	1e-06	2.4e-05	1	-2.88	0	3e-06	1	-3.02	0	2e-06	1	1
1	FBgn0029568	CG11381	CG11381	-1.03	0.838431	0.999395	0	1.04	0.796153	0.99325	0	-1.27	0.089295	0.492594	0	-1.37	0.039385	0.332595	0	-1.88	2.2e-05	0.001065	1	-2.56	0	1e-06	1	-2.6	0	0	1	-2.69	0	1e-06	1	-3.02	0	0	1	-3.51	0	0	1	-3.22	0	0	1	1
1	FBgn0000357	Chorion protein 18	Cp18	-1.11	0.545982	0.999395	0	-1.08	0.656724	0.988335	0	-1.05	0.76791	0.945394	0	-1.62	0.007386	0.121811	0	-2.02	0.000158	0.005284	1	-2.56	1e-06	6.7e-05	1	-3.06	0	3e-06	1	-3.06	0	2e-06	1	-3.5	0	0	1	-3.23	0	1e-06	1	-3.27	0	0	1	1
1	FBgn0029696	CG15571	CG15571	-1.34	0.050438	0.999395	0	-1.08	0.609467	0.988335	0	-1.24	0.146081	0.580767	0	-1.31	0.065139	0.428111	0	-1.74	0.000317	0.009309	1	-2.48	0	4e-06	1	-3.3	0	0	1	-2.65	0	1e-06	1	-3.41	0	0	1	-3.42	0	0	1	-3.29	0	0	1	1
1	FBgn0039777	Jonah 99Fii	Jon99Fii	1.3	0.178883	0.999395	0	-1.1	0.63404	0.988335	0	-1.32	0.154785	0.591148	0	-1.72	0.007301	0.12114	0	-2.2	0.000154	0.005154	1	-2.15	0.000219	0.005334	1	-3.06	0	2.6e-05	1	-2.6	8e-06	0.000281	1	-3.49	0	2e-06	1	-4.06	0	0	1	-3.37	0	3e-06	1	1
1	FBgn0003057	CG10598	CG10598	-1.3	0.284354	0.999395	0	1.06	0.795772	0.99325	0	-1.46	0.182409	0.625381	0	-1.74	0.01691	0.205439	0	-2.49	0.001992	0.040858	1	-2.63	0.000314	0.007143	1	-2.19	0.002479	0.03931	1	-4.24	4e-06	0.00015	1	-2.77	0.000131	0.00274	1	-2.81	3.1e-05	0.000732	1	-3.39	0.000365	0.005944	1	1
1	FBgn0000355	Chorion protein 15	Cp15	-1.07	0.692171	0.999395	0	1.04	0.833253	0.995252	0	1.05	0.781635	0.948465	0	-1.41	0.045963	0.359055	0	-2.16	2.6e-05	0.001208	1	-2.1	5.1e-05	0.001562	1	-2.6	1e-06	3.4e-05	1	-2.96	0	2e-06	1	-3.63	0	0	1	-3.47	0	0	1	-3.58	0	0	1	1
1	FBgn0036715	Cad74A	Cad74A	-1.2	0.355512	0.999395	0	-1.38	0.099528	0.912799	0	-2	0.002011	0.060483	0	-1.45	0.08419	0.489249	0	-2.45	2.5e-05	0.001187	1	-2.09	0.000396	0.008622	1	-1.83	0.002987	0.045079	1	-3.31	1e-06	4.7e-05	1	-2.55	5.4e-05	0.001293	1	-2.56	4.9e-05	0.001077	1	-3.84	0	0	1	1
1	FBgn0031097	obstructor-A	obst-A	-1.04	0.871013	0.999395	0	1.13	0.550385	0.984159	0	-1.35	0.136533	0.569575	0	-1.15	0.484865	0.884209	0	-2.07	0.000519	0.013816	1	-2.29	9.9e-05	0.00278	1	-2.33	7.7e-05	0.002444	1	-3.71	0	9e-06	1	-3.94	0	0	1	-2.44	0.000152	0.002792	1	-4.18	0	0	1	1
1	FBgn0014464	Chorion protein a at 7F	Cp7Fa	-1.23	0.217813	0.999395	0	-1.09	0.596162	0.988335	0	-1.53	0.012552	0.190203	0	-1.65	0.007963	0.127814	0	-2.28	3.2e-05	0.001439	1	-3.83	0	0	1	-4.02	0	0	1	-3.89	0	0	1	-7.07	0	0	1	-6.42	0	0	1	-5.84	0	0	1	1
3	FBgn0036553	CG17027	CG17027	-1	0.963099	0.999703	0	-1.06	0.600734	0.988335	0	-1.31	0.014438	0.204156	0	-1.37	0.004376	0.087159	0	-1.6	4.1e-05	0.001779	1	-1.51	0.000302	0.006961	1	-1.56	0.000107	0.003238	1	-1.84	2e-06	0.000106	1	-1.79	1e-06	4.7e-05	1	-1.62	3.3e-05	0.000766	1	-1.57	8.3e-05	0.001802	1	3
3	FBgn0032082	CG18088	CG18088	-1.25	0.116644	0.999395	0	-1.16	0.27723	0.968329	0	-1.45	0.009088	0.158835	0	-1.56	0.002361	0.056938	0	-1.59	0.001515	0.03281	1	-1.82	6.4e-05	0.001912	1	-2.01	5e-06	0.000244	1	-2.58	0	5e-06	1	-1.8	9e-05	0.001958	1	-1.7	0.000321	0.005092	1	-1.79	0.000306	0.005167	1	3
3	FBgn0027570	Neprilysin 2	Nep2	1.05	0.588668	0.999395	0	1.1	0.306563	0.968665	0	-1.08	0.386694	0.789914	0	-1.43	0.00017	0.007615	0	-1.6	3e-06	0.000176	1	-1.52	1.8e-05	0.000632	1	-1.66	1e-06	3.4e-05	1	-1.6	3e-06	0.000115	1	-1.97	0	0	1	-2.08	0	0	1	-1.83	0	1e-06	1	3
3	FBgn0029708	CG3556	CG3556	-1.13	0.380143	0.999395	0	1.02	0.904469	0.997504	0	-1.09	0.526397	0.861402	0	-1.49	0.006648	0.113363	0	-1.68	0.000549	0.014519	1	-1.7	0.000382	0.008406	1	-1.58	0.001987	0.033612	1	-2.18	1e-06	4.5e-05	1	-2.26	0	1.5e-05	1	-2.08	3e-06	9.4e-05	1	-1.93	1.9e-05	0.000513	1	3
3	FBgn0052774	Mucin 4B	Muc4B	1.06	0.620054	0.999395	0	1.13	0.33633	0.969629	0	-1.08	0.518253	0.857557	0	-1.33	0.025724	0.259506	0	-1.6	0.000372	0.010597	1	-1.6	0.00037	0.008153	1	-1.73	4.7e-05	0.001575	1	-1.64	0.000214	0.004813	1	-2.71	0	0	1	-1.83	1.1e-05	0.000288	1	-1.96	1e-06	5.2e-05	1	3
3	FBgn0037405	CG1077	CG1077	-1.07	0.569188	0.999395	0	-1.03	0.829119	0.994557	0	-1.14	0.292587	0.731529	0	-1.37	0.011698	0.159839	0	-1.67	7.1e-05	0.002759	1	-1.97	1e-06	3.4e-05	1	-1.9	1e-05	0.000437	1	-1.85	1.7e-05	0.000567	1	-1.87	3e-06	9.2e-05	1	-2.12	0	3e-06	1	-2.04	0	1e-05	1	3
3	FBgn0036956	CG13813	CG13813	1.15	0.277	0.999395	0	-1.15	0.279173	0.968329	0	-1.03	0.809994	0.956379	0	-1.32	0.033333	0.302182	0	-1.85	9e-06	0.000482	1	-1.53	0.001389	0.023567	1	-1.76	3.4e-05	0.001194	1	-2.14	0	8e-06	1	-2.35	0	1e-06	1	-1.97	1e-06	5.1e-05	1	-2.07	0	1.5e-05	1	3
3	FBgn0050115	CG30115	CG30115	-1.01	0.939711	0.999703	0	-1.06	0.620764	0.988335	0	-1.21	0.091962	0.496539	0	-1.24	0.082476	0.483563	0	-1.63	5.2e-05	0.002147	1	-1.75	5e-06	0.000215	1	-1.89	0	2.8e-05	1	-1.9	0	1.8e-05	1	-2.19	0	0	1	-1.96	0	6e-06	1	-2.09	0	1e-06	1	3
5	FBgn0033596	CG7738	CG7738	-1.11	0.471077	0.999395	0	1.39	0.021337	0.583576	0	1.5	0.005528	0.114078	0	1.46	0.008773	0.13631	0	1.79	0.000109	0.003898	1	3.17	0	0	1	2.82	0	0	1	2.58	0	1e-06	1	2.5	0	1e-06	1	2.29	0	9e-06	1	3	0	0	1	5
5	FBgn0041184	Suppressor of cytokine signaling at 36E	Socs36E	1.01	0.932698	0.999703	0	1.3	0.045156	0.749518	0	1.53	0.001732	0.056369	0	1.36	0.019565	0.220395	0	2.18	0	1.3e-05	1	3.24	0	0	1	2.46	0	0	1	2.65	0	0	1	2.68	0	0	1	2.39	0	0	1	2.58	0	0	1	5
5	FBgn0051300	CG31300	CG31300	1.41	0.133602	0.999395	0	-1.14	0.570798	0.984494	0	-1.1	0.666458	0.912919	0	1.96	0.008212	0.130201	0	3.42	1e-06	8.3e-05	1	3.73	0	1.7e-05	1	3.4	1e-06	6.6e-05	1	3.38	1e-06	6.2e-05	1	2.99	1e-05	0.000301	1	3.32	2e-06	5.7e-05	1	2.44	0.000211	0.003819	1	5
5	FBgn0028563	sugar transporter 1	sut1	1.07	0.613844	0.999395	0	-1.02	0.894472	0.997504	0	1.02	0.898181	0.982934	0	1.5	0.001975	0.05011	0	2.18	0	9e-06	1	2.38	0	1e-06	1	2.09	0	1.9e-05	1	2.02	1e-06	3.5e-05	1	1.79	2.3e-05	0.000637	1	2.34	0	1e-06	1	1.94	2e-06	7.8e-05	1	5
5	FBgn0031791	CG9486	CG9486	-1	0.989635	0.999703	0	-1.11	0.510864	0.981307	0	1.06	0.721589	0.929781	0	1.45	0.020283	0.226144	0	1.85	0.000192	0.006214	1	2.36	1e-06	4.3e-05	1	1.65	0.002036	0.034221	1	1.81	0.000306	0.006368	1	1.59	0.003829	0.041665	1	2	3.4e-05	0.0008	1	1.68	0.001367	0.017796	1	5
6	FBgn0031737	obstructor-E	obst-E	1.11	0.575527	0.999395	0	1.09	0.652175	0.988335	0	-1.15	0.437135	0.820291	0	1.56	0.017399	0.207723	0	1.78	0.002551	0.049414	1	1.78	0.002414	0.035775	1	1.77	0.002698	0.041813	1	2.25	4.1e-05	0.001211	1	2.03	0.000263	0.004961	1	1.84	0.003469	0.033098	1	2.69	1e-06	4.7e-05	1	6
7	FBgn0005410	strawberry notch	sno	-1.12	0.315801	0.999395	0	-1.09	0.436783	0.974172	0	1.13	0.41033	0.802942	0	1.21	0.134029	0.596104	0	1.65	5.9e-05	0.002358	1	1.56	0.000301	0.00694	1	1.75	4.6e-05	0.001565	1	1.66	5.1e-05	0.001471	1	1.72	1.7e-05	0.000502	1	1.86	1e-06	5e-05	1	2	0	8e-06	1	7
7	FBgn0030979	CG14190	CG14190	1.02	0.879095	0.999395	0	1	0.9749	0.998221	0	1.21	0.087518	0.487055	0	1.34	0.011027	0.154039	0	1.67	2.4e-05	0.001151	1	1.83	1e-06	6.7e-05	1	1.85	1e-06	5.3e-05	1	2.07	0	2e-06	1	1.54	0.000257	0.004892	1	1.6	9.6e-05	0.001875	1	2	0	4e-06	1	7
1	FBgn0013348	Troponin C at 41C	TpnC41C	-1.65	0.004569	0.670117	0	-1.69	0.003047	0.227584	0	-1.83	0.000699	0.029451	1	-1.9	0.000342	0.013198	1	-1.65	0.008718	0.121531	0	-2.02	0.000105	0.002918	1	-2.07	6.7e-05	0.002154	1	-2.3	7e-06	0.000272	1	-2.62	0	2.1e-05	1	-3.11	0	1e-06	1	-2.56	1e-06	2.9e-05	1	1
0	FBgn0014464	Chorion protein a at 7F	Cp7Fa	-1.05	0.75701	0.999395	0	-1.11	0.473442	0.979338	0	-1.21	0.201751	0.647783	0	-1.56	0.004113	0.084012	0	-1.68	0.002626	0.050459	0	-2.15	3e-06	0.00016	1	-2.33	0	3.1e-05	1	-2.02	7.1e-05	0.001953	1	-2.19	2e-06	8.1e-05	1	-2.36	0	1.4e-05	1	-2.59	0	2e-06	1	0
0	FBgn0028537	CG31775	CG31775	-1.57	0.063569	0.999395	0	1.23	0.385828	0.97412	0	-1.04	0.878399	0.97819	0	-1.55	0.070801	0.446582	0	-2.04	0.004009	0.069247	0	-3.11	1.3e-05	0.000505	1	-2.28	0.001001	0.019962	1	-3.11	1.3e-05	0.000459	1	-3.39	4e-06	0.000127	1	-6.23	0	0	1	-4.7	0	1e-06	1	0
0	FBgn0037224	TweedleF	TwdlF	-2.35	0.035304	0.999395	0	1.38	0.372582	0.972321	0	1.24	0.58429	0.884729	0	-1.47	0.33161	0.800948	0	-2.23	0.047393	0.359437	0	-3.27	0.00186	0.029239	1	-3.17	0.002349	0.037978	1	-8.1	0.000144	0.003439	1	-7.45	3.3e-05	0.000881	1	-5.46	2e-05	0.000505	1	-5.94	9e-06	0.000279	1	0
1	FBgn0031554	CG15418	CG15418	-1.35	0.091214	0.999395	0	1.18	0.4051	0.97412	0	-1.14	0.461996	0.834212	0	-1.36	0.088768	0.500761	0	-1.56	0.014763	0.174204	0	-2.06	0.000128	0.003373	1	-1.75	0.002434	0.038883	1	-2.03	0.000176	0.004081	1	-2.8	0	1.4e-05	1	-2.37	8e-06	0.000229	1	-2.09	0.000105	0.002195	1	1
1	FBgn0030187	Interaction partner of Dnmt2	Ipod	-1.29	0.168703	0.999395	0	1.09	0.646365	0.988335	0	-1.16	0.419172	0.807565	0	-1.21	0.309556	0.788435	0	-1.51	0.027688	0.257399	0	-2.22	6e-05	0.001818	1	-2.28	3.6e-05	0.001275	1	-2.57	3e-06	0.000144	1	-1.79	0.002501	0.030527	1	-2.35	2e-05	0.000505	1	-2.19	0.00031	0.005213	1	1
1	FBgn0034622	CG15666	CG15666	-1.03	0.775634	0.999395	0	1.04	0.678283	0.988335	0	-1.25	0.025357	0.275467	0	-1.39	0.001441	0.039536	0	-1.4	0.001242	0.027946	0	-1.72	1e-06	5e-05	1	-2.09	0	0	1	-1.8	0	9e-06	1	-2.48	0	0	1	-2.52	0	0	1	-2.21	0	0	1	1
1	FBgn0030186	CG2962	CG2962	-1.14	0.546767	0.999395	0	1.22	0.344781	0.969629	0	1.03	0.875365	0.977129	0	1.05	0.811917	0.972691	0	-1.42	0.099166	0.534747	0	-2.09	0.000944	0.017288	1	-1.86	0.002108	0.035077	1	-2.44	9.3e-05	0.00245	1	-2.44	2.5e-05	0.00068	1	-2.07	0.001058	0.013297	1	-2.31	0.000205	0.003734	1	1
1	FBgn0035273	CG12020	CG12020	1.4	0.021341	0.957371	0	1.11	0.469903	0.978931	0	1.17	0.2757	0.720202	0	-1.15	0.344317	0.808458	0	-1.35	0.042778	0.337931	0	-1.8	0.00014	0.003645	1	-1.82	0.000106	0.003203	1	-2.01	9e-06	0.000327	1	-2.65	0	1e-06	1	-2.85	0	0	1	-2.89	0	0	1	1
1	FBgn0030027	CG1632	CG1632	-1.38	0.009879	0.822654	0	-1.18	0.212291	0.957756	0	-1.54	0.001913	0.059032	0	-1.21	0.185801	0.669804	0	-1.9	0.003691	0.065564	0	-1.95	0.000352	0.007833	1	-3.23	0	0	1	-4.18	0	6e-06	1	-3.74	0	1.9e-05	1	-3.64	0	1.8e-05	1	-3.18	0	5e-06	1	1
3	FBgn0034699	CG13504	CG13504	1.01	0.87423	0.999395	0	1.17	0.068272	0.850761	0	-1.02	0.773061	0.946173	0	-1.27	0.006159	0.108385	0	-1.37	0.000353	0.010215	0	-1.5	7e-06	0.000304	1	-1.6	0	3.4e-05	1	-1.59	1e-06	3.4e-05	1	-1.83	0	0	1	-1.74	0	1e-06	1	-1.72	0	1e-06	1	3
3	FBgn0031681	polypeptide GalNAc transferase 5	pgant5	1.02	0.857209	0.999395	0	-1.09	0.394887	0.97412	0	-1.26	0.044771	0.365765	0	-1.45	0.001683	0.044323	0	-1.46	0.000509	0.013621	0	-1.51	0.000162	0.004155	1	-1.59	3.1e-05	0.001134	1	-1.86	0	8e-06	1	-1.82	0	1.3e-05	1	-1.79	0	1.8e-05	1	-1.82	0	1.4e-05	1	3
3	FBgn0031720	CG14013	CG14013	-1.17	0.05608	0.999395	0	-1	0.968055	0.99777	0	-1.13	0.141638	0.57733	0	-1.14	0.149923	0.622429	0	-1.41	9.4e-05	0.003495	0	-1.7	0	2e-06	1	-1.84	0	0	1	-1.77	0	0	1	-1.89	0	0	1	-1.97	0	0	1	-1.82	0	0	1	3
3	FBgn0038046	CG5641	CG5641	-1.07	0.537444	0.999395	0	1.1	0.338405	0.969629	0	-1.22	0.053674	0.401108	0	-1.2	0.109226	0.54613	0	-1.49	0.000233	0.007327	0	-1.93	0	3e-06	1	-1.89	0	5e-06	1	-1.91	0	3e-06	1	-2.25	0	0	1	-2.24	0	0	1	-1.87	0	5e-06	1	3
3	FBgn0037225	TweedleG	TwdlG	-1.14	0.417045	0.999395	0	1.09	0.588641	0.987615	0	-1.67	0.00214	0.06337	0	-1.08	0.66579	0.942068	0	-1.21	0.231133	0.756796	0	-1.87	0.00023	0.005555	1	-1.66	0.002437	0.038883	1	-2.1	2.1e-05	0.00068	1	-1.87	0.000223	0.004328	1	-1.74	0.001004	0.012743	1	-1.9	0.000172	0.003246	1	3
3	FBgn0017424	CG11538	CG11538	-1	0.991888	0.999703	0	1.02	0.886761	0.997504	0	-1.07	0.587232	0.885547	0	-1.35	0.020956	0.230628	0	-1.42	0.007692	0.11222	0	-1.52	0.001537	0.025377	1	-1.71	7.8e-05	0.002467	1	-1.86	7e-06	0.000266	1	-1.97	1e-06	5.3e-05	1	-1.88	6e-06	0.000163	1	-1.94	2e-06	7.6e-05	1	3
3	FBgn0001316	klarsicht	klar	-1.14	0.102792	0.999395	0	-1.18	0.033939	0.669242	0	-1.28	0.002191	0.064285	0	-1.48	4e-06	0.000349	0	-1.4	0.000165	0.005459	0	-1.8	0	0	1	-1.79	0	0	1	-1.91	0	0	1	-1.97	0	0	1	-2.14	0	0	1	-1.98	0	0	1	3
3	FBgn0003285	roughest	rst	1.06	0.609862	0.999395	0	1.05	0.659365	0.988335	0	-1.21	0.105638	0.51841	0	-1.33	0.017947	0.211016	0	-1.39	0.00775	0.112416	0	-2.08	0	5e-06	1	-2.23	0	1e-06	1	-2.18	0	1e-06	1	-2.26	0	0	1	-1.7	3.7e-05	0.000848	1	-1.99	0	1.3e-05	1	3
3	FBgn0030205	CG17255	CG17255	1.08	0.382103	0.999395	0	-1.03	0.737675	0.989139	0	-1.04	0.629032	0.899513	0	-1.14	0.153916	0.625459	0	-1.16	0.100876	0.537716	0	-1.56	6e-06	0.00026	1	-1.56	6e-06	0.000273	1	-1.65	1e-06	4.1e-05	1	-1.62	1e-06	5.5e-05	1	-1.64	1e-06	3.4e-05	1	-2.05	0	0	1	3
3	FBgn0032086	CG17906	CG17906	-1.17	0.097013	0.999395	0	1.17	0.093856	0.908049	0	-1.03	0.76881	0.9454	0	-1.4	0.000521	0.018034	0	-1.34	0.00261	0.050308	0	-1.52	2.8e-05	0.000957	1	-1.67	1e-06	5e-05	1	-1.69	2.1e-05	0.000677	1	-2.03	0	0	1	-2.02	0	0	1	-2.05	0	0	1	3
3	FBgn0001309	kismet	kis	-1.02	0.875468	0.999395	0	-1.11	0.453678	0.977361	0	-1.15	0.293954	0.732258	0	-1.2	0.186703	0.670001	0	-1.26	0.09325	0.514593	0	-1.75	0.000107	0.002941	1	-1.75	0.000109	0.003283	1	-1.61	0.000856	0.014971	1	-1.53	0.002704	0.032251	1	-1.51	0.003629	0.034176	1	-2.17	0	1.8e-05	1	3
3	FBgn0005390	female sterile (1) M3	fs(1)M3	-1.06	0.530849	0.999395	0	-1.11	0.301519	0.968665	0	-1.08	0.412951	0.804045	0	-1.22	0.042201	0.342818	0	-1.32	0.00634	0.09816	0	-1.94	0	1e-06	1	-1.99	0	0	1	-1.96	0	0	1	-1.87	0	2e-06	1	-2.35	0	0	1	-2.48	0	0	1	3
3	FBgn0036504	yellow-k	yellow-k	1.2	0.18112	0.999395	0	1.21	0.166611	0.949455	0	-1.18	0.274445	0.719215	0	-1.25	0.185196	0.668653	0	-1.28	0.077634	0.469484	0	-1.68	0.001063	0.018952	1	-1.98	3.6e-05	0.001247	1	-2.36	1e-06	3.5e-05	1	-1.92	7.5e-05	0.0017	1	-1.88	0.00047	0.006876	1	-2.5	0	1.1e-05	1	3
5	FBgn0038088	CG10126	CG10126	-1.02	0.9189	0.999703	0	1.26	0.132331	0.940266	0	1.29	0.100605	0.511191	0	1.3	0.09542	0.517641	0	1.37	0.044768	0.347192	0	2.46	0	1.7e-05	1	2.01	3e-05	0.001094	1	2.14	7e-06	0.000266	1	1.64	0.002133	0.026912	1	1.64	0.00204	0.022344	1	2.63	0	3e-06	1	5
5	FBgn0039806	CG15545	CG15545	1.14	0.487345	0.999395	0	-1.15	0.512884	0.981307	0	1.13	0.542476	0.867183	0	1.35	0.151424	0.624391	0	1.74	0.004652	0.077706	0	3.43	0	2e-06	1	2.07	0.00029	0.007271	1	2.71	1.4e-05	0.000475	1	2.5	1e-05	0.000327	1	2.46	1.4e-05	0.000355	1	2.19	0.000111	0.002291	1	5
5	FBgn0033134	Tetraspanin 42El	Tsp42El	1.2	0.306521	0.999395	0	1.31	0.129705	0.937224	0	1.08	0.675899	0.915115	0	1.11	0.561171	0.912832	0	1.27	0.187093	0.697549	0	2.2	3.7e-05	0.001191	1	2.05	0.000151	0.004283	1	1.87	0.000797	0.014201	1	2.04	0.000162	0.003299	1	1.75	0.002422	0.025343	1	1.93	0.000432	0.006794	1	5
5	FBgn0027929	nimrod B1	nimB1	1.02	0.87548	0.999395	0	1.16	0.212357	0.957756	0	1.48	0.001233	0.044423	0	1.49	0.001056	0.03107	0	1.45	0.002326	0.045986	0	1.83	3e-06	0.000126	1	1.92	1e-06	3.7e-05	1	2.22	0	1e-06	1	1.73	1.6e-05	0.00048	1	1.91	1e-06	2.9e-05	1	1.74	5.4e-05	0.001262	1	5
7	FBgn0037125	CG14573	CG14573	1.05	0.644806	0.999395	0	-1.04	0.665251	0.988335	0	1.4	0.000912	0.035063	0	1.31	0.007254	0.121008	0	1.48	0.000127	0.004417	0	1.56	2.2e-05	0.000756	1	1.54	3.2e-05	0.001156	1	1.65	3e-06	0.000112	1	1.84	0	2e-06	1	1.99	0	0	1	1.82	0	3e-06	1	7
1	FBgn0013467	igloo	igl	-1.11	0.45383	0.999395	0	-1.74	0.000132	0.033347	1	-2.05	2e-06	0.000348	1	-2.26	1e-06	0.000116	1	-2.51	0	1e-06	1	-1.41	0.013115	0.125655	0	-1.87	8.5e-05	0.002626	1	-2.25	0	9e-06	1	-2.27	1e-06	3.3e-05	1	-2.09	1e-06	3.9e-05	1	-1.88	1.9e-05	0.000518	1	1
1	FBgn0041605	complexin	cpx	-1.05	0.71863	0.999395	0	-1.91	4.7e-05	0.017	1	-1.71	0.00061	0.02697	1	-1.91	4.8e-05	0.002865	1	-2.55	0	5e-06	1	-1.55	0.004242	0.054504	0	-1.61	0.002067	0.034606	1	-1.98	2e-05	0.000665	1	-2.04	1.1e-05	0.000335	1	-2.08	6e-06	0.000185	1	-2.2	2e-06	5.7e-05	1	1
0	FBgn0000120	Arrestin 1	Arr1	-1.11	0.635075	0.999395	0	-2.09	0.000902	0.115173	0	-2.63	2.3e-05	0.002249	1	-4.31	0	1e-06	1	-4.57	0	0	1	-1.68	0.016922	0.150456	0	-2.53	4.4e-05	0.001507	1	-3.64	0	5e-06	1	-5.65	0	0	1	-5.18	0	0	1	-4.69	0	0	1	0
3	FBgn0034394	CG15096	CG15096	1.2	0.069326	0.999395	0	-1.18	0.108988	0.92052	0	-1.55	5.1e-05	0.004191	1	-1.5	0.000142	0.006639	1	-1.72	1e-06	8.7e-05	1	-1.39	0.00159	0.026122	0	-1.63	9e-06	0.000363	1	-1.85	0	5e-06	1	-2.17	0	0	1	-2.54	0	0	1	-2.08	0	0	1	3
1	FBgn0029814	CG15765	CG15765	1.17	0.311986	0.999395	0	-1.06	0.692578	0.988335	0	-1.26	0.175586	0.613197	0	-2.09	1.7e-05	0.001273	1	-1.68	0.001678	0.03571	1	-1.53	0.009022	0.095024	0	-2.3	2e-06	9.5e-05	1	-2.54	1e-06	6e-05	1	-1.97	0.000847	0.012867	1	-2	4.2e-05	0.000943	1	-2.14	1e-05	0.000313	1	1
3	FBgn0051288	CG31288	CG31288	1.09	0.416463	0.999395	0	-1.1	0.398521	0.97412	0	-1.24	0.052859	0.398639	0	-1.57	0.0001	0.005133	1	-1.88	0	2.5e-05	1	-1.43	0.001539	0.025377	0	-1.63	0.000105	0.003195	1	-1.86	0	1.9e-05	1	-1.71	6e-06	0.000204	1	-2	0	2e-06	1	-1.56	0.000107	0.002227	1	3
3	FBgn0035664	Jonah 65Aiv	Jon65Aiv	1.27	0.096098	0.999395	0	1.17	0.272684	0.964139	0	-1.15	0.32559	0.75605	0	-1.62	0.001077	0.03154	1	-1.72	0.00029	0.008677	1	-1.51	0.004766	0.059512	0	-1.76	0.000168	0.004691	1	-1.67	0.000546	0.010469	1	-2.07	3e-06	0.000102	1	-2.42	0	2e-06	1	-2.04	5e-06	0.000151	1	3
3	FBgn0031914	CG5973	CG5973	1.11	0.329404	0.999395	0	-1.07	0.558019	0.984159	0	-1.39	0.003936	0.094072	0	-1.55	0.000203	0.008705	1	-1.66	2.2e-05	0.001084	1	-1.31	0.016614	0.148967	0	-1.51	0.001228	0.023426	1	-1.77	3e-06	0.000127	1	-2.12	0	0	1	-2.22	0	1e-06	1	-2.29	0	0	1	3
3	FBgn0015570	alpha-Esterase-2	alpha-Est2	-1.02	0.8173	0.999395	0	-1.13	0.173361	0.950325	0	-1.71	0	8e-05	1	-1.34	0.002463	0.058391	0	-1.55	1.1e-05	0.000601	1	-1.36	0.00129	0.022137	0	-1.51	3.3e-05	0.00119	1	-1.63	2e-06	7.6e-05	1	-1.63	2e-06	6.3e-05	1	-1.82	0	1e-06	1	-1.57	8e-06	0.000251	1	3
1	FBgn0005391	Yolk protein 2	Yp2	1.27	0.088141	0.999395	0	1.15	0.306434	0.968665	0	-1.08	0.585889	0.885257	0	-1.48	0.007204	0.120475	0	-1.72	0.000258	0.007893	1	-1.46	0.00846	0.090631	0	-1.71	0.00031	0.007652	1	-2.04	1.9e-05	0.000644	1	-2.75	0	0	1	-3.23	0	0	1	-3.28	0	0	1	1
3	FBgn0038147	CG14375	CG14375	-1.25	0.075834	0.999395	0	-1.59	0.00039	0.069288	0	-1.45	0.003749	0.091255	0	-1.39	0.009771	0.143766	0	-1.57	0.000515	0.013741	1	-1.38	0.010471	0.106125	0	-1.51	0.001381	0.025426	1	-1.68	8.7e-05	0.002309	1	-2.09	0	7e-06	1	-2.4	0	0	1	-1.53	0.00093	0.012916	1	3
3	FBgn0025620	CG13360	CG13360	1.24	0.06647	0.999395	0	-1.01	0.933226	0.997504	0	-1.17	0.194217	0.639285	0	-1.31	0.026098	0.261873	0	-1.62	0.000121	0.004231	1	-1.23	0.076836	0.387113	0	-1.53	0.000591	0.012877	1	-1.62	0.000125	0.003089	1	-1.75	1.2e-05	0.000361	1	-1.84	3e-06	9e-05	1	-1.61	0.000138	0.002717	1	3
3	FBgn0019929	Ser7	Ser7	1.1	0.522938	0.999395	0	-1.06	0.672438	0.988335	0	-1.04	0.78809	0.950016	0	-1.3	0.076852	0.4685	0	-1.63	0.001281	0.028632	1	-1.35	0.042047	0.26948	0	-1.58	0.002689	0.041776	1	-1.59	0.002318	0.032315	1	-2.45	0	4e-06	1	-2.06	6e-06	0.000169	1	-1.63	0.001426	0.018396	1	3
3	FBgn0036381	CG8745	CG8745	1.06	0.551352	0.999395	0	-1.14	0.21207	0.957756	0	-1.33	0.00629	0.124147	0	-1.26	0.043888	0.350489	0	-1.75	1e-06	7.6e-05	1	-1.45	0.000583	0.011891	0	-1.53	8.9e-05	0.002739	1	-1.7	3e-06	0.000118	1	-2.25	0	0	1	-2.03	0	0	1	-1.9	0	3e-06	1	3
3	FBgn0032085	CG9555	CG9555	1.08	0.626164	0.999395	0	-1.21	0.240741	0.960504	0	-1.11	0.511025	0.854629	0	-1.68	0.004101	0.083961	0	-1.9	0.000141	0.004805	1	-1.39	0.04219	0.269862	0	-1.69	0.001484	0.026845	1	-2.13	1.2e-05	0.000424	1	-1.99	5.6e-05	0.001341	1	-1.99	5.3e-05	0.001158	1	-1.96	7.4e-05	0.001642	1	3
3	FBgn0033887	CG6704	CG6704	1.04	0.741971	0.999395	0	1.02	0.846141	0.996946	0	-1.08	0.452353	0.828529	0	-1.39	0.002757	0.062372	0	-1.63	2.6e-05	0.001199	1	-1.46	0.000699	0.013697	0	-1.62	2.6e-05	0.000974	1	-1.69	7e-06	0.000272	1	-2.12	0	0	1	-1.74	3e-06	8.2e-05	1	-2.1	0	0	1	3
5	FBgn0053224			1.05	0.760067	0.999395	0	1.37	0.035225	0.679496	0	1.43	0.029312	0.300486	0	2.26	1e-06	0.000114	1	1.56	0.003843	0.06718	0	1.43	0.018514	0.159793	0	1.71	0.000576	0.012665	1	2.27	1e-06	3.8e-05	1	2.9	0	1e-06	1	2.17	2e-06	7e-05	1	2.16	1.3e-05	0.00038	1	5
3	FBgn0032523	CG16956	CG16956	-1.2	0.149062	0.999395	0	-1	0.980509	0.998783	0	-1.58	0.000509	0.024251	1	1.04	0.768137	0.965719	0	-1.09	0.490691	0.91157	0	-1.42	0.006086	0.071169	0	-1.98	1e-06	5.3e-05	1	-1.78	1.8e-05	0.000607	1	-1.85	7e-06	0.000217	1	-1.79	1.6e-05	0.000421	1	-1.68	9.1e-05	0.001953	1	3
1	FBgn0011643			-1.32	0.149439	0.999395	0	-1.51	0.032411	0.660015	0	-1.47	0.043936	0.362873	0	-1.54	0.024575	0.252962	0	-1.53	0.027751	0.25752	0	-1.66	0.008997	0.094839	0	-1.8	0.00279	0.042941	1	-1.9	0.001187	0.019428	1	-2.28	5.2e-05	0.00125	1	-2.76	1e-06	4.7e-05	1	-1.91	0.001121	0.015066	1	1
1	FBgn0039761	CG18404	CG18404	-1.06	0.76071	0.999395	0	-1.06	0.766605	0.990614	0	-1.02	0.929397	0.986316	0	-1.4	0.097431	0.522958	0	-1.8	0.004836	0.080164	0	-1.79	0.005097	0.062489	0	-2.22	0.000201	0.005388	1	-2.29	0.000115	0.002906	1	-3.08	1e-06	2.7e-05	1	-4.16	0	0	1	-3.02	1e-06	3.5e-05	1	1
3	FBgn0004426	Lysozyme C	LysC	-1.13	0.430281	0.999395	0	-1.13	0.440739	0.974172	0	1.05	0.75098	0.940777	0	-1.36	0.050059	0.373452	0	-1.58	0.00424	0.072108	0	-1.57	0.005137	0.062821	0	-1.85	0.000532	0.01197	1	-1.83	0.000239	0.005246	1	-1.76	0.000524	0.008883	1	-1.67	0.003635	0.034202	1	-1.79	0.000392	0.006251	1	3
3	FBgn0051661	CG31661	CG31661	1.28	0.126024	0.999395	0	1.16	0.344092	0.969629	0	-1.13	0.447214	0.825996	0	-1.63	0.002826	0.063383	0	-1.53	0.008635	0.121016	0	-1.55	0.007414	0.082106	0	-2.06	9.2e-05	0.00285	1	-1.75	0.000753	0.013648	1	-1.75	0.000732	0.011628	1	-1.59	0.004395	0.03949	1	-1.84	0.000263	0.004558	1	3
3	FBgn0030674	CG8184	CG8184	-1.04	0.589211	0.999395	0	-1.15	0.041893	0.731924	0	-1.11	0.117646	0.541334	0	-1.06	0.344983	0.808458	0	-1.19	0.009037	0.124525	0	-1.45	0	3e-05	0	-1.58	0	0	1	-1.62	0	0	1	-1.7	0	0	1	-1.8	0	0	1	-1.87	0	0	1	3
3	FBgn0029993	CG1571	CG1571	1.08	0.524977	0.999395	0	1.11	0.362849	0.972321	0	1.01	0.928833	0.986316	0	-1.38	0.008865	0.137203	0	-1.4	0.005844	0.091775	0	-1.39	0.007476	0.082469	0	-1.53	0.000684	0.014605	1	-1.53	0.000677	0.012473	1	-1.82	5e-06	0.000159	1	-1.99	0	1.2e-05	1	-1.91	1e-06	3.7e-05	1	3
3	FBgn0052237	CG32237	CG32237	1.05	0.720306	0.999395	0	1.13	0.340337	0.969629	0	-1.02	0.875094	0.977028	0	-1.33	0.0338	0.304654	0	-1.28	0.067786	0.437333	0	-1.4	0.01273	0.123038	0	-1.57	0.001037	0.020525	1	-1.71	0.000125	0.003103	1	-1.82	2.8e-05	0.000749	1	-1.78	4.8e-05	0.001073	1	-1.96	4e-06	0.000124	1	3
3	FBgn0040569	CG14310	CG14310	1.16	0.055364	0.999395	0	1.1	0.19573	0.957756	0	1.01	0.939462	0.986316	0	-1.28	0.001488	0.040159	0	-1.27	0.002068	0.041815	0	-1.5	1e-06	6.5e-05	0	-1.57	0	8e-06	1	-1.74	0	0	1	-1.98	0	0	1	-1.87	0	0	1	-1.97	0	0	1	3
3	FBgn0010383	Cytochrome P450-18a1	Cyp18a1	-1.02	0.888553	0.999395	0	-1.09	0.568557	0.984159	0	-1.23	0.168647	0.60582	0	-1.38	0.050779	0.37457	0	-1.56	0.003818	0.066822	0	-1.31	0.07096	0.371395	0	-1.59	0.002598	0.04075	1	-1.87	8.4e-05	0.002239	1	-2.03	1.2e-05	0.00038	1	-2.59	0	2e-06	1	-2.01	6.5e-05	0.001473	1	3
3	FBgn0038487	TweedleW	TwdlW	-1.12	0.445373	0.999395	0	-1.1	0.542979	0.984159	0	-1.18	0.269174	0.715384	0	-1.05	0.726737	0.95587	0	-1.33	0.058779	0.404744	0	-1.56	0.004298	0.055048	0	-1.91	6e-05	0.00197	1	-2.17	3e-06	0.000124	1	-2.01	2e-05	0.000575	1	-2.13	5e-06	0.000141	1	-2.04	1.3e-05	0.000377	1	3
3	FBgn0038236	Cyp313a1	Cyp313a1	1.17	0.075168	0.999395	0	-1.06	0.466893	0.978681	0	-1.16	0.124857	0.554851	0	-1.34	0.001124	0.032403	0	-1.43	9.5e-05	0.003519	0	-1.39	0.000242	0.005766	0	-1.62	1e-06	3.4e-05	1	-1.62	0	2.8e-05	1	-1.56	2e-06	8.3e-05	1	-1.77	0	1e-06	1	-2.1	0	0	1	3
3	FBgn0004867	string of pearls	sop	-1.09	0.357966	0.999395	0	-1.01	0.90643	0.997504	0	-1.05	0.583772	0.884269	0	-1.12	0.236366	0.724112	0	-1.32	0.005527	0.088578	0	-1.42	0.000668	0.013269	0	-1.59	1.2e-05	0.000496	1	-1.55	3.1e-05	0.000952	1	-2.02	0	0	1	-2.48	0	0	1	-2.11	0	0	1	3
3	FBgn0051146	CG31146	CG31146	1.42	0.009211	0.822654	0	-1.26	0.075994	0.873932	0	1.06	0.658352	0.910536	0	-1.14	0.328387	0.799109	0	-1.37	0.01755	0.193357	0	-1.4	0.011397	0.113493	0	-1.56	0.00115	0.022368	1	-1.8	3e-05	0.000926	1	-1.95	3e-06	0.000119	1	-2.25	0	3e-06	1	-2.16	0	8e-06	1	3
5	FBgn0053343			-1.06	0.733131	0.999395	0	1.07	0.679799	0.988335	0	1.18	0.290607	0.730441	0	1.34	0.093878	0.514058	0	1.53	0.01716	0.189867	0	1.43	0.026951	0.205884	0	2.39	5e-06	0.000244	1	1.79	0.000505	0.009807	1	3.05	0	0	1	2.09	2e-05	0.000502	1	2.06	2.6e-05	0.000672	1	5
1	FBgn0051267	CG31267	CG31267	-1.04	0.835303	0.999395	0	-1.26	0.173412	0.950325	0	-2.1	3.8e-05	0.003427	1	-2.32	5e-06	0.000433	1	-2.43	2e-06	0.000121	1	-1.67	0.003153	0.043633	1	-1.7	0.005027	0.065495	0	-2.51	1e-06	4.4e-05	1	-2.22	1.2e-05	0.000379	1	-3.08	0	1e-06	1	-2.09	4.4e-05	0.001046	1	1
3	FBgn0033822			-1.28	0.039452	0.999395	0	-1.5	0.00083	0.110188	0	-1.55	0.000332	0.017542	1	-1.67	4.2e-05	0.002582	1	-1.5	0.000809	0.019996	1	-1.53	0.000533	0.011092	1	-1.5	0.000914	0.018578	0	-1.57	0.000267	0.005754	1	-1.72	1.8e-05	0.000512	1	-1.87	1e-06	4.6e-05	1	-1.64	7.1e-05	0.001585	1	3
3	FBgn0038481	CG17475	CG17475	-1.02	0.855166	0.999395	0	-1.07	0.414869	0.97412	0	-1.57	1.1e-05	0.001305	1	-1.71	0	1.2e-05	1	-1.69	0	1.1e-05	1	-1.51	1.1e-05	0.000431	1	-1.46	5.1e-05	0.001713	0	-1.57	2e-06	0.000111	1	-1.53	6e-06	0.0002	1	-1.84	0	0	1	-1.77	0	1e-06	1	3
3	FBgn0031908	CG5177	CG5177	-1.19	0.152953	0.999395	0	-1.28	0.045383	0.749967	0	-1.57	0.000475	0.023137	1	-1.76	2.2e-05	0.001541	1	-1.67	0.00031	0.009181	1	-1.74	3e-05	0.001008	1	-1.49	0.009034	0.099873	0	-1.71	4.8e-05	0.001394	1	-2.04	0	1.4e-05	1	-2.29	0	1e-06	1	-1.89	3e-06	9.3e-05	1	3
3	FBgn0051266	CG31266	CG31266	-1.09	0.490615	0.999395	0	-1.34	0.026034	0.613678	0	-1.38	0.015994	0.214854	0	-1.68	0.000158	0.007116	1	-1.71	0.000101	0.003662	1	-1.58	0.000743	0.014355	1	-1.45	0.005503	0.070025	0	-2.03	1e-06	4.2e-05	1	-1.96	2e-06	8.5e-05	1	-1.92	4e-06	0.000121	1	-1.79	2.8e-05	0.000718	1	3
1	FBgn0035856	CG13679	CG13679	-1.36	0.128393	0.999395	0	1.19	0.384696	0.97412	0	-2.11	0.000479	0.023221	1	-1.56	0.049023	0.369326	0	-2.14	0.000397	0.011069	1	-2.68	4.9e-05	0.00153	1	-1.65	0.016123	0.149925	0	-3.06	6e-06	0.000239	1	-2.5	0.000118	0.002495	1	-2.95	5.6e-05	0.0012	1	-2.63	1.3e-05	0.000372	1	1
1	FBgn0039436	TweedleB	TwdlB	-1.84	0.004053	0.670117	0	-1.28	0.237372	0.960504	0	-1.52	0.043598	0.361118	0	-1.41	0.10131	0.531839	0	-1.91	0.002414	0.047433	1	-2.28	0.000166	0.004228	1	-1.83	0.004342	0.059152	0	-2.39	7.6e-05	0.002063	1	-3.37	1e-06	5.1e-05	1	-2.79	5e-06	0.00016	1	-3.29	0	1.3e-05	1	1
3	FBgn0026389	Odorant receptor 43a	Or43a	1.12	0.39963	0.999395	0	1.04	0.760306	0.990342	0	-1.04	0.789125	0.950261	0	-1.43	0.013275	0.174677	0	-1.62	0.001033	0.024161	1	-1.66	0.00058	0.011834	1	-1.45	0.010016	0.108093	0	-2.01	5e-06	0.000204	1	-2.49	0	1e-06	1	-2.59	0	0	1	-2.36	0	4e-06	1	3
3	FBgn0052627	CG32627	CG32627	-1.16	0.333242	0.999395	0	-1.37	0.029772	0.642182	0	-1.59	0.003775	0.091545	0	-1.69	0.001213	0.0345	1	-1.53	0.007292	0.10807	0	-2.11	2e-06	0.000111	1	-1.22	0.168376	0.574599	0	-2.27	1.5e-05	0.000519	1	-2.32	0	1e-05	1	-1.61	0.003122	0.030561	1	-1.86	4.9e-05	0.001157	1	3
1	FBgn0036206	CG5964	CG5964	-1.06	0.719375	0.999395	0	1.17	0.332843	0.969629	0	-1.24	0.192103	0.636391	0	-1.16	0.399906	0.839867	0	-1.48	0.020685	0.212153	0	-2.87	0	3e-06	1	-1.58	0.007065	0.084195	0	-2.55	4e-06	0.000152	1	-2.43	1e-06	5.8e-05	1	-2.6	0	1.3e-05	1	-2.12	2.6e-05	0.000669	1	1
1	FBgn0020642	Lcp65Ac	Lcp65Ac	-1.85	0.114306	0.999395	0	1.16	0.612758	0.988335	0	1.06	0.879119	0.978329	0	-1.2	0.424526	0.854927	0	-2	0.011657	0.147196	0	-2.37	0.000654	0.013098	1	-1.61	0.043343	0.282888	0	-2.25	0.003612	0.044882	1	-3.23	1.2e-05	0.000357	1	-2.12	0.002174	0.023364	1	-2.68	3.1e-05	0.000771	1	1
1	FBgn0040718	CG15353	CG15353	-1.38	0.146385	0.999395	0	-1.32	0.214352	0.957756	0	-1.5	0.069824	0.44838	0	-1.96	0.003041	0.067408	0	-1.98	0.002711	0.051648	0	-1.95	0.00345	0.04646	1	-1.83	0.007442	0.087372	0	-2.43	0.000145	0.003439	1	-3.21	2e-06	6.4e-05	1	-3.89	0	2e-05	1	-3.08	3e-06	0.000113	1	1
1	FBgn0036382	CG13737	CG13737	-1.29	0.219913	0.999395	0	1.32	0.186259	0.956671	0	-1.02	0.92243	0.986316	0	-1.32	0.184858	0.668123	0	-1.73	0.010421	0.136848	0	-1.91	0.002789	0.039806	1	-1.89	0.014523	0.140165	0	-2.7	1.2e-05	0.000409	1	-4.12	0	0	1	-3.16	1e-06	2.9e-05	1	-3.33	0	1.4e-05	1	1
3	FBgn0034778			1.07	0.625611	0.999395	0	1.06	0.682903	0.988335	0	-1.18	0.234494	0.681953	0	-1.28	0.069533	0.442857	0	-1.45	0.007861	0.113679	0	-1.77	8.8e-05	0.002502	1	-1.35	0.029655	0.223702	0	-1.5	0.003646	0.045087	1	-1.72	0.00018	0.003611	1	-1.89	1.5e-05	0.000391	1	-1.65	0.000438	0.006872	1	3
3	FBgn0033590	CG13217	CG13217	-1.06	0.71474	0.999395	0	1.13	0.417019	0.97412	0	1.11	0.507106	0.853513	0	-1.36	0.069471	0.442857	0	-1.44	0.019842	0.207839	0	-1.64	0.002001	0.030986	1	-1.59	0.00789	0.090978	0	-1.98	4.1e-05	0.001229	1	-2.14	3.1e-05	0.000838	1	-1.62	0.002637	0.026902	1	-1.76	0.003865	0.039169	1	3
3	FBgn0034169	CG9013	CG9013	1.14	0.246064	0.999395	0	-1.02	0.896103	0.997504	0	1.13	0.290394	0.730431	0	-1.12	0.325938	0.798955	0	-1.37	0.008355	0.118604	0	-1.54	0.000415	0.008938	1	-1.46	0.001873	0.032221	0	-1.61	0.000122	0.003056	1	-1.69	2.6e-05	0.000716	1	-1.67	3.9e-05	0.000882	1	-1.78	6e-06	0.000183	1	3
3	FBgn0050203	CG30203	CG30203	1.34	0.032581	0.971141	0	1.13	0.365326	0.972321	0	1.16	0.256444	0.703167	0	-1.21	0.155967	0.628838	0	-1.38	0.030723	0.273145	0	-1.51	0.002916	0.041166	1	-1.28	0.07327	0.385716	0	-1.59	0.000944	0.016138	1	-1.58	0.001101	0.015951	1	-1.82	3.4e-05	0.0008	1	-1.88	1.4e-05	0.000403	1	3
3	FBgn0004777	Ccp84Ag	Ccp84Ag	-1.21	0.266305	0.999395	0	1.11	0.552114	0.984159	0	-1.35	0.085316	0.482572	0	-1.04	0.836027	0.977505	0	-1.57	0.010579	0.138373	0	-1.76	0.001545	0.025418	1	-1.56	0.011736	0.12126	0	-1.78	0.001269	0.020444	1	-1.97	0.00019	0.003765	1	-1.71	0.002638	0.026902	1	-2.17	2.9e-05	0.000731	1	3
7	FBgn0005626	pale	ple	1.37	0.012162	0.845853	0	-1.14	0.279051	0.968329	0	-1.11	0.399747	0.796991	0	-1.13	0.371506	0.827308	0	1.32	0.024983	0.239879	0	1.53	0.000911	0.016754	1	1.47	0.002302	0.037357	0	1.87	3e-06	0.00013	1	1.76	7.2e-05	0.00165	1	1.6	0.000274	0.004508	1	2.29	0	0	1	7
7	FBgn0035049	Matrix metalloproteinase 1	Mmp1	1.53	0.006912	0.791949	0	1.13	0.423454	0.97412	0	1.4	0.02914	0.300486	0	1.26	0.137476	0.602776	0	1.21	0.21104	0.734283	0	1.88	0.000108	0.00297	1	1.54	0.006352	0.077997	0	1.66	0.001477	0.023003	1	1.77	0.00041	0.007187	1	1.71	0.000806	0.010689	1	1.65	0.00167	0.020844	1	7
3	FBgn0004919	goliath	gol	-1.22	0.070284	0.999395	0	-1.58	0.000104	0.030326	1	-1.57	0.00012	0.008317	1	-1.71	8e-06	0.000689	1	-1.78	2e-06	0.00016	1	-1.29	0.02256	0.183782	0	-1.41	0.006112	0.076004	0	-1.55	0.000179	0.004124	1	-1.9	0	1.4e-05	1	-2.05	0	1e-06	1	-2.01	0	3e-06	1	3
3	FBgn0039321	CG10550	CG10550	1.13	0.233823	0.999395	0	-1.13	0.240223	0.960504	0	-1.51	0.000148	0.00955	1	-2.03	0	1e-06	1	-1.84	0	1.5e-05	1	-1.44	0.000672	0.013321	0	-1.41	0.00137	0.025295	0	-1.76	1e-06	3.5e-05	1	-1.75	1e-06	3.8e-05	1	-1.84	0	7e-06	1	-1.54	8.7e-05	0.00187	1	3
3	FBgn0051782	CG31782	CG31782	-1.07	0.516217	0.999395	0	-1.48	0.000445	0.074976	0	-1.87	0	5.5e-05	1	-1.89	0	2.2e-05	1	-1.98	0	3e-06	1	-1.34	0.007407	0.082096	0	-1.49	0.000364	0.008782	0	-1.71	4e-06	0.000162	1	-1.93	0	3e-06	1	-1.67	9e-06	0.000247	1	-1.68	7e-06	0.000222	1	3
3	FBgn0040992	CG10570	CG10570	-1.16	0.399119	0.999395	0	-1.69	0.003431	0.246456	0	-2.08	7.6e-05	0.0059	1	-2.22	2.1e-05	0.001464	1	-2.14	4.3e-05	0.001836	1	-1.2	0.292013	0.720604	0	-1.25	0.204295	0.626566	0	-1.69	0.00358	0.044562	1	-2.23	2e-05	0.000581	1	-2.78	0	8e-06	1	-1.91	0.000402	0.006361	1	3
1	FBgn0033723	CG13155	CG13155	1.13	0.465874	0.999395	0	-1.05	0.77189	0.990997	0	-1.31	0.141419	0.577314	0	-1.76	0.001324	0.037188	1	-2.09	4.5e-05	0.001885	1	-1.59	0.007777	0.084913	0	-1.63	0.005115	0.066313	0	-1.74	0.001672	0.025422	1	-2.36	4e-06	0.000123	1	-2.55	1e-06	2.6e-05	1	-2.36	1.7e-05	0.000466	1	1
1	FBgn0000121	Arrestin 2	Arr2	1.05	0.794902	0.999395	0	-1.38	0.062337	0.828822	0	-1.62	0.006174	0.122772	0	-2.25	1.3e-05	0.00103	1	-2.58	1e-06	6e-05	1	-1.15	0.41392	0.81596	0	-1.6	0.007677	0.089308	0	-1.93	0.000296	0.006248	1	-3.12	0	1e-06	1	-2.92	0	2e-06	1	-2.86	0	4e-06	1	1
3	FBgn0038257	Senescence marker protein-30	smp-30	1.04	0.786471	0.999395	0	-1.19	0.231836	0.958834	0	-1.11	0.473913	0.840709	0	-1.67	0.000663	0.021634	1	-1.92	2.6e-05	0.001211	1	-1.37	0.031941	0.230314	0	-1.47	0.009565	0.104079	0	-1.66	0.000786	0.014089	1	-2.26	0	2e-05	1	-2.63	0	1e-06	1	-1.92	2.8e-05	0.000717	1	3
7	FBgn0033030	CG1294	CG1294	1.24	0.056614	0.999395	0	1.55	0.00023	0.048782	1	1.69	1.9e-05	0.001895	1	1.3	0.024232	0.250815	0	1.6	9.7e-05	0.003582	1	1.37	0.006462	0.073739	0	1.35	0.008783	0.097924	0	1.92	0	1.6e-05	1	1.57	0.00017	0.003454	1	1.94	0	9e-06	1	1.87	1e-06	2.5e-05	1	7
3	FBgn0028915	CG7532	CG7532	-1.24	0.22829	0.999395	0	-1.27	0.179351	0.950325	0	-1.82	0.001187	0.043095	1	-1.69	0.008374	0.132017	0	-1.82	0.001199	0.027174	1	-1.33	0.106183	0.459792	0	-1.3	0.13402	0.51885	0	-1.77	0.001879	0.027746	1	-2.23	2.5e-05	0.000698	1	-3.1	0	1e-06	1	-2.02	0.000174	0.003276	1	3
3	FBgn0039757	Ribosomal protein S7	RpS7	-1.05	0.73951	0.999395	0	-1.26	0.099764	0.912799	0	-1.51	0.004195	0.097247	0	-1.17	0.262063	0.748885	0	-1.62	0.000972	0.023222	1	-1.12	0.427415	0.819813	0	-1.12	0.421119	0.813581	0	-1.6	0.001261	0.020381	1	-1.64	0.000677	0.010945	1	-2.19	0	2e-05	1	-1.52	0.003555	0.036941	1	3
3	FBgn0038194	Cyp6d5	Cyp6d5	1.16	0.143067	0.999395	0	-1.01	0.935506	0.997504	0	-1.18	0.111121	0.529811	0	-1.33	0.006128	0.108385	0	-1.59	2.4e-05	0.001122	1	-1.22	0.050246	0.304048	0	-1.43	0.000806	0.01668	0	-1.54	7.8e-05	0.002102	1	-1.89	0	3e-06	1	-1.91	0	2e-06	1	-1.6	1.9e-05	0.000519	1	3
3	FBgn0020910	Ribosomal protein L3	RpL3	1.01	0.901662	0.999395	0	-1.25	0.016597	0.51936	0	-1.4	0.000505	0.024221	0	-1.5	4.5e-05	0.002695	0	-1.59	4e-06	0.00026	1	-1.29	0.007975	0.086419	0	-1.41	0.000414	0.009786	0	-1.58	5e-06	0.000212	1	-1.71	0	1.2e-05	1	-1.84	0	1e-06	1	-1.78	0	2e-06	1	3
3	FBgn0036262	CG6910	CG6910	1.41	0.021525	0.957371	0	1.07	0.653055	0.988335	0	1.01	0.972671	0.994476	0	-1.13	0.421041	0.852057	0	-1.72	0.000472	0.012731	1	1.05	0.723725	0.933544	0	-1.27	0.109097	0.4705	0	-1.76	0.000293	0.006192	1	-2.26	1e-06	3.1e-05	1	-2.66	0	1e-06	1	-1.99	1.7e-05	0.000482	1	3
3	FBgn0022984	quaking related 58E-3	qkr58E-3	1.06	0.555319	0.999395	0	1.14	0.221928	0.957756	0	-1.09	0.39961	0.796991	0	-1.42	0.002679	0.061362	0	-1.53	0.000134	0.004602	1	-1.43	0.00105	0.018774	0	-1.44	0.000739	0.015628	0	-1.55	7.5e-05	0.002051	1	-1.95	0	2e-06	1	-2.15	0	0	1	-1.99	0	1e-06	1	3
3	FBgn0033942	Cuticular protein 51A	Cpr51A	-1.34	0.045029	0.999395	0	1.02	0.879157	0.997504	0	-1.3	0.077975	0.46681	0	-1.33	0.053713	0.388298	0	-1.75	0.000286	0.008593	1	-1.54	0.004239	0.054504	0	-1.51	0.006368	0.078011	0	-2.79	0	0	1	-2.03	9e-06	0.000275	1	-2.26	1e-06	2.2e-05	1	-2	1.2e-05	0.000354	1	3
3	FBgn0030773	CG9676	CG9676	1.38	0.049818	0.999395	0	-1.29	0.120072	0.92616	0	-1.41	0.036884	0.335761	0	-1.47	0.034264	0.307437	0	-1.9	0.000187	0.006098	1	-1.3	0.108947	0.465573	0	-1.39	0.045918	0.291634	0	-1.63	0.003764	0.04607	1	-2.08	2.7e-05	0.000744	1	-1.67	0.002256	0.024036	1	-2.07	3.2e-05	0.000786	1	3
7	FBgn0016930	smell impaired 35A	smi35A	-1.01	0.933313	0.999703	0	-1.02	0.799619	0.99325	0	1.17	0.036071	0.331804	0	1.32	0.000423	0.015446	0	1.54	0	3.1e-05	1	1.43	1.2e-05	0.000456	0	1.47	3e-06	0.00017	0	1.61	0	2e-06	1	1.57	0	6e-06	1	1.61	0	2e-06	1	1.72	0	0	1	7
2	FBgn0036876	CG9451	CG9451	-1.05	0.623299	0.999395	0	-1.33	0.00615	0.334063	0	-1.5	0.000122	0.008338	1	-1.2	0.067321	0.435568	0	-1.38	0.001925	0.03966	0	1.04	0.715394	0.930798	0	-1.24	0.036009	0.252942	0	-1.5	0.000127	0.003144	1	-1.57	3e-05	0.000796	1	-1.75	1e-06	2.2e-05	1	-1.56	3.5e-05	0.000863	1	2
1	FBgn0042119	Cuticular protein 65Au	Cpr65Au	1.03	0.872416	0.999395	0	-1.08	0.695909	0.988335	0	-1.28	0.218769	0.665615	0	-1.54	0.032448	0.297231	0	-1.78	0.004938	0.081246	0	-1.38	0.108896	0.46557	0	-1.52	0.037162	0.257771	0	-1.95	0.001203	0.019622	1	-2.22	0.000151	0.003095	1	-3.32	0	5e-06	1	-2.23	0.000141	0.002747	1	1
1	FBgn0039678	Odorant-binding protein 99a	Obp99a	1.12	0.545227	0.999395	0	1.16	0.43626	0.974172	0	1.3	0.174362	0.61232	0	1.06	0.76178	0.964307	0	-1.3	0.181246	0.688179	0	-1.4	0.083195	0.404284	0	-1.76	0.004683	0.062263	0	-1.95	0.000975	0.016524	1	-2.9	1e-06	3.4e-05	1	-4.11	0	0	1	-2.4	2.7e-05	0.000678	1	1
1	FBgn0004003	windbeutel	wbl	1.2	0.311441	0.999395	0	1.28	0.181216	0.950325	0	1.04	0.844218	0.969309	0	-1.56	0.016178	0.199274	0	-1.6	0.01158	0.146678	0	-1.53	0.021016	0.17434	0	-1.53	0.021344	0.179043	0	-2.02	0.000237	0.00521	1	-2.87	0	1.2e-05	1	-2.96	0	6e-06	1	-2.9	0	9e-06	1	1
3	FBgn0002921	Na pump alpha subunit	Atpalpha	1.04	0.508537	0.999395	0	-1.24	0.001572	0.163964	0	-1.27	0.000559	0.0258	0	-1.35	2.4e-05	0.001635	0	-1.31	0.000144	0.004855	0	-1.29	0.000257	0.006064	0	-1.45	4e-06	0.000197	0	-1.75	0	0	1	-1.66	0	0	1	-1.61	0	0	1	-1.51	0	4e-06	1	3
3	FBgn0033033	scarface	scarface	1.07	0.528699	0.999395	0	-1.06	0.630009	0.988335	0	-1.2	0.112715	0.532774	0	-1.4	0.004082	0.083771	0	-1.48	0.000991	0.023511	0	-1.27	0.036097	0.247184	0	-1.29	0.02844	0.217479	0	-1.59	0.000139	0.003353	1	-1.68	2.3e-05	0.000656	1	-2.06	0	2e-06	1	-1.63	6.4e-05	0.001452	1	3
3	FBgn0031245	CG3625	CG3625	1.06	0.577815	0.999395	0	1.03	0.789692	0.99325	0	-1.15	0.194858	0.639311	0	-1.32	0.010999	0.153968	0	-1.41	0.001826	0.03815	0	-1.34	0.007256	0.080903	0	-1.38	0.003705	0.052819	0	-1.6	3.8e-05	0.001137	1	-1.95	0	3e-06	1	-1.99	0	1e-06	1	-1.65	1.6e-05	0.000452	1	3
3	FBgn0038676	CG6026	CG6026	1.18	0.067219	0.999395	0	1.01	0.949792	0.99777	0	-1.08	0.379429	0.786651	0	-1.29	0.005575	0.102346	0	-1.44	0.000103	0.003689	0	-1.29	0.010467	0.106125	0	-1.4	0.000304	0.007547	0	-1.66	0	1.8e-05	1	-1.8	0	1e-06	1	-1.6	2e-06	5.6e-05	1	-1.65	0	2e-05	1	3
3	FBgn0038136	CG8774	CG8774	1.05	0.686067	0.999395	0	-1.14	0.298935	0.968665	0	-1.19	0.163716	0.600644	0	-1.25	0.080782	0.47854	0	-1.42	0.00687	0.103675	0	-1.14	0.297455	0.724628	0	-1.4	0.00889	0.09895	0	-1.5	0.002032	0.029418	1	-1.5	0.0019	0.024564	1	-2.3	0	1e-06	1	-1.67	0.000133	0.002631	1	3
3	FBgn0031734	CG11147	CG11147	1.23	0.152971	0.999395	0	-1.26	0.10806	0.92052	0	-1.37	0.030728	0.308105	0	-1.4	0.022952	0.242523	0	-1.46	0.009745	0.131249	0	-1.46	0.010234	0.104794	0	-1.18	0.251233	0.681722	0	-1.83	8.1e-05	0.002175	1	-1.75	0.000222	0.004327	1	-1.75	0.000239	0.004068	1	-1.69	0.000548	0.008319	1	3
3	FBgn0036214	CG7264	CG7264	1.02	0.907408	0.999395	0	1.25	0.199801	0.957756	0	1.1	0.57985	0.882294	0	-1.24	0.380118	0.83099	0	-1.57	0.010763	0.139602	0	-1.11	0.627012	0.901788	0	-1.47	0.04659	0.294232	0	-1.9	0.000442	0.008783	1	-1.78	0.001451	0.019958	1	-1.83	0.000855	0.011257	1	-1.7	0.00299	0.032913	1	3
3	FBgn0038610	CG7675	CG7675	1.14	0.414968	0.999395	0	1.03	0.834194	0.995254	0	-1.13	0.441914	0.823499	0	-1.55	0.007699	0.125235	0	-1.4	0.038033	0.313255	0	-1.37	0.055402	0.320452	0	-1.6	0.004644	0.062095	0	-1.8	0.000504	0.009798	1	-2.17	9e-06	0.000292	1	-2.22	6e-06	0.000163	1	-1.71	0.00138	0.017948	1	3
3	FBgn0034229	CG4847	CG4847	-1.06	0.62053	0.999395	0	-1.12	0.343801	0.969629	0	-1.4	0.005159	0.109905	0	-1.44	0.002952	0.06565	0	-1.5	0.000995	0.02354	0	-1.3	0.026849	0.205504	0	-1.29	0.03357	0.243268	0	-1.51	0.000852	0.014905	1	-1.87	1e-06	5.6e-05	1	-2.29	0	0	1	-1.72	2.1e-05	0.000555	1	3
3	FBgn0030540	CG11581	CG11581	1.03	0.851983	0.999395	0	1.04	0.762484	0.990362	0	-1.02	0.863308	0.973416	0	-1.23	0.151591	0.624391	0	-1.29	0.074115	0.458249	0	-1.32	0.050582	0.304999	0	-1.44	0.012188	0.124487	0	-1.53	0.003834	0.046531	1	-1.82	8.1e-05	0.001819	1	-1.88	3.5e-05	0.000817	1	-1.73	0.000256	0.004461	1	3
3	FBgn0038983	CG5326	CG5326	1.1	0.262282	0.999395	0	-1.13	0.149717	0.947216	0	-1.38	0.000359	0.018644	0	-1.47	0.000138	0.006534	0	-1.5	1.7e-05	0.000845	0	-1.34	0.001158	0.020316	0	-1.49	1.9e-05	0.000749	0	-1.67	0	1e-05	1	-1.71	0	3e-06	1	-1.63	0	1.9e-05	1	-1.79	0	1e-06	1	3
3	FBgn0050339	CG30339	CG30339	1.07	0.666709	0.999395	0	-1.03	0.847091	0.996946	0	-1.05	0.769871	0.945481	0	-1.53	0.009842	0.144267	0	-1.12	0.47806	0.9072	0	-1.32	0.060596	0.337249	0	-1.37	0.035466	0.251439	0	-1.62	0.001651	0.025262	1	-1.61	0.001763	0.023106	1	-1.86	8.4e-05	0.001677	1	-1.86	7.9e-05	0.00174	1	3
3	FBgn0039386	CG5948	CG5948	1.26	0.068788	0.999395	0	-1.09	0.50269	0.981307	0	-1.19	0.180361	0.620964	0	-1.15	0.276653	0.759934	0	-1.44	0.00547	0.088016	0	-1.32	0.034032	0.239483	0	-1.42	0.007623	0.088908	0	-1.5	0.002056	0.029686	1	-1.57	0.000765	0.011981	1	-1.89	5e-06	0.00014	1	-1.88	6e-06	0.000194	1	3
3	FBgn0003886	alpha-Tubulin at 85E	alphaTub85E	1.17	0.3727	0.999395	0	-1.05	0.764228	0.990513	0	-1.39	0.045406	0.368662	0	-1.77	0.002003	0.050354	0	-1.19	0.283121	0.815748	0	-1.56	0.007696	0.084229	0	-1.47	0.02076	0.176171	0	-1.97	0.001345	0.021334	1	-2.15	6.2e-05	0.001448	1	-2.28	4e-06	0.000134	1	-2.27	2e-05	0.000542	1	3
3	FBgn0004045	Yolk protein 1	Yp1	1.1	0.344802	0.999395	0	1.13	0.260744	0.964139	0	1.09	0.457307	0.831784	0	-1.15	0.178499	0.660254	0	-1.37	0.007102	0.106091	0	-1.45	0.00184	0.029003	0	-1.41	0.003616	0.051781	0	-1.54	0.000349	0.007151	1	-1.86	0	1e-05	1	-2.03	0	1e-06	1	-2.41	0	0	1	3
5	FBgn0052436	CG32436	CG32436	-1.01	0.930541	0.999703	0	-1	0.988683	0.998783	0	1.23	0.176545	0.614744	0	1.51	0.00952	0.141889	0	1.58	0.004358	0.073825	0	1.57	0.004641	0.058328	0	1.5	0.010218	0.109644	0	1.87	0.000141	0.00338	1	2.06	1.7e-05	0.000491	1	1.7	0.000974	0.012495	1	2.43	0	1.5e-05	1	5
6	FBgn0031913	CG5958	CG5958	1.13	0.314887	0.999395	0	-1.02	0.889955	0.997504	0	-1.13	0.318747	0.751203	0	-1.21	0.124173	0.577177	0	-1.35	0.016054	0.183181	0	-1.04	0.738968	0.938429	0	-1.21	0.123883	0.500988	0	-1.51	0.001162	0.019094	1	-1.66	8e-05	0.001798	1	-1.91	1e-06	4.7e-05	1	-1.51	0.001029	0.014123	1	6
7	FBgn0038434			1.09	0.5307	0.999395	0	1.22	0.168785	0.949455	0	1.13	0.440292	0.822107	0	1.4	0.020957	0.230628	0	1.55	0.003472	0.062635	0	1.01	0.928184	0.985591	0	1.37	0.031461	0.232596	0	1.63	0.002852	0.03787	1	1.98	1.3e-05	0.000409	1	2.77	0	0	1	2.23	1e-06	2.6e-05	1	7
7	FBgn0029983			-1.21	0.286213	0.999395	0	-1.12	0.519354	0.981307	0	1.08	0.64598	0.904804	0	1.21	0.371012	0.827308	0	1.48	0.02871	0.262621	0	1.69	0.003915	0.051364	0	1.4	0.059627	0.342267	0	1.84	0.00239	0.033101	1	2.03	0.000158	0.003223	1	2.14	6e-05	0.001284	1	1.97	0.000275	0.004756	1	7
7	FBgn0015844	Xeroderma pigmentosum D	Xpd	1.02	0.812685	0.999395	0	-1.11	0.240423	0.960504	0	1.09	0.316376	0.747844	0	1.21	0.04524	0.356587	0	1.24	0.0146	0.1729	0	1.2	0.036958	0.249646	0	1.36	0.001982	0.033581	0	1.53	7e-06	0.000272	1	1.58	2e-06	7.3e-05	1	1.65	0	1.3e-05	1	1.84	0	0	1	7
7	FBgn0030150	CG15321	CG15321	1.12	0.238186	0.999395	0	1.04	0.647116	0.988335	0	1.16	0.10854	0.524181	0	1.16	0.10875	0.545203	0	1.34	0.002463	0.048242	0	1.2	0.05426	0.317001	0	1.36	0.001695	0.029949	0	1.63	2e-06	8.3e-05	1	1.79	0	3e-06	1	1.9	0	0	1	1.78	0	3e-06	1	7
7	FBgn0051781	CG31781	CG31781	1.47	0.000386	0.298248	0	1.08	0.458635	0.977521	0	1.12	0.28074	0.724245	0	1.08	0.465682	0.876488	0	1.08	0.473498	0.905544	0	1.25	0.030612	0.224052	0	1.44	0.000747	0.015734	0	1.59	2.7e-05	0.000841	1	1.62	1.3e-05	0.000409	1	1.61	8e-05	0.001622	1	1.5	0.000195	0.003601	1	7
3	FBgn0031533	CG2772	CG2772	-1.05	0.532636	0.999395	0	-1.2	0.033574	0.666661	0	-1.37	0.000538	0.025215	0	-1.65	0	4.2e-05	1	-1.59	1e-06	8.1e-05	1	-1.54	4e-06	0.000204	1	-1.6	1e-06	4.6e-05	1	-1.43	8.1e-05	0.002173	0	-1.76	0	1e-06	1	-1.82	0	0	1	-1.73	0	2e-06	1	3
3	FBgn0033296	CG11669	CG11669	1.09	0.528214	0.999395	0	-1.12	0.395925	0.97412	0	-1.49	0.004223	0.097549	0	-1.63	0.00057	0.01917	1	-1.98	4e-06	0.000247	1	-1.53	0.002301	0.034529	1	-1.54	0.001964	0.033404	1	-1.28	0.068892	0.321977	0	-1.84	2.7e-05	0.000745	1	-1.97	4e-06	0.000127	1	-1.83	3.1e-05	0.000778	1	3
0	FBgn0036606	CG13060	CG13060	-1.52	0.131946	0.999395	0	-1.08	0.754753	0.989815	0	-2.5	0.000595	0.026871	1	-1.73	0.031831	0.294246	0	-2.42	0.002177	0.043696	1	-4.16	1e-06	4.1e-05	1	-3.66	1.9e-05	0.000745	1	-3.06	0.015431	0.127175	0	-4.08	5e-06	0.000161	1	-3.26	7.6e-05	0.001542	1	-4.31	0.000142	0.002765	1	0
5	FBgn0051355	CG31355	CG31355	-1.01	0.980909	0.999703	0	-1.21	0.578358	0.985816	0	1.62	0.088866	0.492055	0	1.42	0.115187	0.560488	0	2.58	6.8e-05	0.00267	1	2.89	3e-06	0.000126	1	2.07	0.000609	0.013264	1	1.6	0.035289	0.213931	0	2.9	3e-06	9.2e-05	1	2.51	2.8e-05	0.000683	1	2.46	4e-05	0.000974	1	5
7	FBgn0020503	Cytoplasmic linker protein 190	CLIP-190	1.15	0.239641	0.999395	0	1.1	0.44377	0.974172	0	1.13	0.302283	0.737372	0	1.27	0.046381	0.359527	0	1.64	9.9e-05	0.003637	1	2.03	0	1e-05	1	1.54	0.000518	0.011748	1	1.5	0.001192	0.019464	0	1.54	0.00052	0.008827	1	1.83	4e-06	0.000111	1	1.51	0.000873	0.012299	1	7
3	FBgn0052645	CG32645	CG32645	-1.04	0.634517	0.999395	0	1	0.969408	0.99777	0	-1.28	0.004005	0.095098	0	-1.28	0.003227	0.070584	0	-1.47	1.4e-05	0.000726	0	-1.6	0	1.9e-05	1	-1.85	0	0	1	-1.46	2e-05	0.00065	0	-1.78	0	0	1	-1.61	0	1e-05	1	-1.9	0	0	1	3
7	FBgn0033541	CG12934	CG12934	-1.02	0.866856	0.999395	0	1.06	0.638774	0.988335	0	1.53	0.001986	0.060293	0	1.19	0.177606	0.658971	0	1.18	0.200119	0.716379	0	2.19	0	1e-05	1	1.55	0.001333	0.024812	1	1.47	0.004832	0.055355	0	2.22	0	6e-06	1	1.65	0.000302	0.00488	1	2.13	0	1.4e-05	1	7
3	FBgn0053301	CG33301	CG33301	-1.05	0.700754	0.999395	0	-1.43	0.007483	0.362146	0	-1.26	0.078159	0.46681	0	-1.26	0.078531	0.471794	0	-2.02	1e-06	8.1e-05	1	-1.37	0.016928	0.150456	0	-1.59	0.000662	0.01419	1	-1.47	0.004106	0.048932	0	-1.62	0.00043	0.007469	1	-1.7	0.000124	0.002349	1	-1.58	0.000805	0.011455	1	3
3	FBgn0035665	Jonah 65Aiii	Jon65Aiii	1.23	0.147479	0.999395	0	1.15	0.325202	0.968964	0	-1.05	0.738451	0.935374	0	-1.53	0.00428	0.086267	0	-1.71	0.000378	0.010707	1	-1.36	0.034569	0.241047	0	-1.61	0.001384	0.025445	1	-1.46	0.009556	0.092073	0	-1.78	0.000141	0.00291	1	-2.6	0	1e-06	1	-1.9	3.1e-05	0.000777	1	3
3	FBgn0035542	CG11347	CG11347	1.1	0.381732	0.999395	0	-1.19	0.106591	0.92052	0	-1.25	0.037524	0.339235	0	-1.6	3.6e-05	0.002243	1	-1.49	0.000354	0.010215	0	-1.36	0.005279	0.06395	0	-1.75	2e-06	8.9e-05	1	-1.4	0.002212	0.031337	0	-1.82	0	2.1e-05	1	-1.87	0	8e-06	1	-1.79	1e-06	2.9e-05	1	3
3	FBgn0036391	CG17364	CG17364	1.14	0.08252	0.999395	0	-1.06	0.439684	0.974172	0	-1.14	0.091663	0.496539	0	-1.39	5.6e-05	0.003162	0	-1.33	0.000387	0.010858	0	-1.41	3e-05	0.000995	0	-1.55	0	2.6e-05	1	-1.34	0.000351	0.007167	0	-1.53	1e-06	2.8e-05	1	-1.53	1e-06	2.8e-05	1	-1.56	0	1.2e-05	1	3
3	FBgn0036588	CG13068	CG13068	-1.04	0.740488	0.999395	0	1.16	0.180034	0.950325	0	-1.02	0.854833	0.972382	0	-1.3	0.021046	0.23093	0	-1.2	0.107233	0.553154	0	-1.26	0.039205	0.258679	0	-1.51	0.000476	0.010999	1	-1.45	0.003277	0.04154	0	-1.8	2e-06	6.8e-05	1	-1.81	1e-06	5.1e-05	1	-1.73	7e-06	0.000225	1	3
3	FBgn0000241	brown	bw	1.02	0.797226	0.999395	0	-1.21	0.008731	0.385404	0	-1.12	0.126643	0.557144	0	-1.16	0.042317	0.342818	0	-1.27	0.001296	0.028868	0	-1.42	7e-06	0.000278	0	-1.65	0	0	1	-1.5	0	2.8e-05	0	-1.53	0	9e-06	1	-1.65	0	0	1	-1.74	0	0	1	3
3	FBgn0016047	no mechanoreceptor potential A	nompA	1.49	0.00683	0.791949	0	-1.03	0.837835	0.995427	0	-1.05	0.747494	0.93928	0	-1.21	0.185453	0.669351	0	-1.46	0.010914	0.141065	0	-1.18	0.25482	0.692917	0	-1.55	0.003154	0.047014	1	-1.51	0.005576	0.061649	0	-1.6	0.001681	0.022386	1	-1.76	0.000197	0.003445	1	-1.82	9.5e-05	0.002029	1	3
3	FBgn0036023	CG18179	CG18179	1.18	0.280218	0.999395	0	1.07	0.629414	0.988335	0	-1.14	0.383519	0.788204	0	-1.48	0.011158	0.154808	0	-1.56	0.008553	0.120405	0	-1.37	0.036875	0.249622	0	-1.65	0.001453	0.026423	1	-1.54	0.005426	0.060491	0	-1.86	0.000105	0.002266	1	-1.83	0.000159	0.002892	1	-1.89	7.4e-05	0.001644	1	3
6	FBgn0058174	CG40174	CG40174	1.04	0.562198	0.999395	0	1.02	0.7696	0.990832	0	1.07	0.348943	0.769098	0	-1.12	0.118794	0.567627	0	-1.28	0.001107	0.025494	0	-1.39	2.7e-05	0.000923	0	-1.51	0	2.4e-05	1	-1.32	0.000243	0.005282	0	-1.58	0	2e-06	1	-1.64	0	0	1	-1.62	0	1e-06	1	6
7	FBgn0011474	pr-set7	pr-set7	-1.03	0.768258	0.999395	0	-1.05	0.660124	0.988335	0	1.38	0.003313	0.084561	0	1.22	0.06528	0.428409	0	1.21	0.077714	0.469484	0	1.22	0.069671	0.368244	0	1.54	0.00014	0.004043	1	1.36	0.005575	0.061649	0	1.68	9e-06	0.000275	1	1.82	1e-06	2.2e-05	1	1.74	3e-06	8.9e-05	1	7
3	FBgn0004169	upheld	up	-1.25	0.010832	0.82807	0	-1.39	0.000264	0.054159	0	-1.58	1e-06	0.000248	1	-1.57	2e-06	0.000236	1	-1.52	3.1e-05	0.0014	1	-1.6	5e-06	0.000209	1	-1.33	0.001514	0.027234	0	-1.43	8.5e-05	0.002244	0	-1.73	0	2e-06	1	-1.68	0	5e-06	1	-1.5	1.2e-05	0.000341	1	3
2	FBgn0039667	CG2010	CG2010	-1.27	0.024837	0.964922	0	-1.38	0.003256	0.23778	0	-1.2	0.085949	0.483648	0	-1.27	0.027173	0.267657	0	-1.24	0.043231	0.340898	0	-1.56	8.7e-05	0.002489	1	-1.33	0.014582	0.140428	0	-1.39	0.005303	0.059327	0	-1.6	3.4e-05	0.000883	1	-1.65	5.5e-05	0.001192	1	-1.52	0.000179	0.003341	1	2
3	FBgn0002772	Myosin alkali light chain 1	Mlc1	-1.18	0.22727	0.999395	0	-1.38	0.018488	0.55221	0	-1.38	0.020402	0.247407	0	-1.34	0.03458	0.308592	0	-1.4	0.015021	0.176802	0	-1.51	0.003187	0.04405	1	-1.48	0.004671	0.062263	0	-1.46	0.006455	0.069497	0	-1.84	2.9e-05	0.000768	1	-2.06	1e-06	4.7e-05	1	-1.54	0.002014	0.024312	1	3
3	FBgn0037014	CG13251	CG13251	-1.06	0.717165	0.999395	0	1.33	0.062983	0.83345	0	-1.46	0.01478	0.206468	0	-1.31	0.141843	0.609456	0	-1.67	0.003189	0.058566	0	-1.78	0.001024	0.018422	1	-1.42	0.037181	0.257771	0	-2.02	0.009306	0.090212	0	-1.73	0.004471	0.04679	1	-1.92	0.000926	0.011965	1	-1.99	0.000509	0.007846	1	3
3	FBgn0030593	CG9512	CG9512	1.19	0.13788	0.999395	0	1.06	0.584805	0.986792	0	-1.15	0.223408	0.670937	0	-1.64	5.5e-05	0.003139	1	-1.94	0	2.7e-05	1	-1.42	0.003377	0.045788	0	-1.34	0.012577	0.127149	0	-1.39	0.005096	0.057545	0	-1.58	0.000177	0.003546	1	-1.66	3.7e-05	0.000844	1	-1.5	0.001754	0.021678	1	3
3	FBgn0040732	CG16926	CG16926	1.02	0.874431	0.999395	0	1.03	0.8203	0.994557	0	-1.34	0.023575	0.266229	0	-1.53	0.001313	0.036956	1	-1.53	0.001453	0.031785	1	-1.25	0.077767	0.388834	0	-1.37	0.014959	0.142665	0	-1.24	0.087827	0.364313	0	-1.68	0.000128	0.00268	1	-1.83	1.1e-05	0.000302	1	-1.53	0.001273	0.016815	1	3
3	FBgn0036422	CG3868	CG3868	-1.14	0.37105	0.999395	0	-1.19	0.242733	0.961352	0	-1.23	0.15964	0.594734	0	-1.68	0.000699	0.022369	1	-1.68	0.000653	0.016761	1	-1.01	0.962725	0.989571	0	-1.24	0.136731	0.522934	0	-1.32	0.062254	0.303021	0	-1.55	0.003476	0.03899	1	-2.14	2e-06	7.3e-05	1	-1.56	0.003287	0.03496	1	3
3	FBgn0013307	Ornithine decarboxylase 1	Odc1	1.09	0.44522	0.999395	0	1.02	0.855708	0.996946	0	-1.33	0.009824	0.166405	0	-1.64	2.5e-05	0.001697	1	-1.76	2e-06	0.000163	1	-1.44	0.001174	0.020581	0	-1.43	0.001682	0.029762	0	-1.48	0.000564	0.010743	0	-2.01	0	1e-06	1	-2.18	0	0	1	-1.68	1e-05	0.000314	1	3
3	FBgn0002940	neither inactivation nor afterpotential E	ninaE	-1.07	0.48697	0.999395	0	-1.21	0.041758	0.731924	0	-1.42	0.000326	0.017326	0	-1.53	2.1e-05	0.001473	1	-1.61	3e-06	0.00021	1	-1.13	0.19129	0.613436	0	-1.21	0.045383	0.290367	0	-1.43	0.000297	0.006249	0	-1.65	1e-06	4.2e-05	1	-1.82	0	1e-06	1	-1.68	0	2.2e-05	1	3
3	FBgn0003248	Rhodopsin 2	Rh2	1.12	0.380134	0.999395	0	-1.25	0.071569	0.86548	0	-1.04	0.776648	0.947397	0	-1.63	0.000198	0.008601	1	-1.59	0.0004	0.011133	1	-1.01	0.945168	0.986986	0	-1.26	0.06761	0.366765	0	-1.31	0.034071	0.209705	0	-1.79	1.7e-05	0.000491	1	-1.79	1.7e-05	0.000439	1	-1.73	4.6e-05	0.001076	1	3
3	FBgn0037302			-1.07	0.683433	0.999395	0	-1.27	0.14042	0.946088	0	-1.49	0.015949	0.2148	0	-2.01	6.1e-05	0.003392	1	-1.81	0.000494	0.013249	1	-1.11	0.51473	0.858209	0	-1.2	0.252521	0.683425	0	-1.39	0.046557	0.256172	0	-2.03	4.8e-05	0.001187	1	-1.89	0.000219	0.003767	1	-1.76	0.000872	0.012292	1	3
3	FBgn0002571	Larval visceral protein L	LvpL	-1.17	0.203592	0.999395	0	-1.39	0.009207	0.389296	0	-1.35	0.016994	0.223836	0	-1.56	0.000572	0.01917	1	-1.55	0.000646	0.016616	1	-1.47	0.002354	0.03517	0	-1.29	0.038698	0.26439	0	-1.46	0.002992	0.039107	0	-2.11	0	5e-06	1	-2.24	0	1e-06	1	-1.77	1.6e-05	0.000441	1	3
3	FBgn0028433	G protein gamma30A	Ggamma30A	-1.13	0.349062	0.999395	0	-1.47	0.005818	0.322434	0	-1.41	0.01368	0.199145	0	-1.78	6.1e-05	0.003392	1	-2.12	1e-06	5.4e-05	1	1.11	0.449631	0.829297	0	-1.23	0.133476	0.518276	0	-1.38	0.018937	0.144054	0	-1.82	3.5e-05	0.000907	1	-1.83	3.1e-05	0.000732	1	-1.8	5e-05	0.001179	1	3
3	FBgn0025454	Cyp6g1	Cyp6g1	-1.13	0.451652	0.999395	0	-1.42	0.03786	0.701425	0	-1.35	0.073099	0.456471	0	-1.84	0.000506	0.017682	1	-1.95	0.000169	0.005563	1	-1.36	0.072078	0.374239	0	-1.42	0.04019	0.271617	0	-1.51	0.016729	0.133677	0	-1.76	0.001258	0.017806	1	-1.72	0.001918	0.021294	1	-1.8	0.000801	0.011414	1	3
3	FBgn0004623	G protein beta-subunit 76C	Gbeta76C	-1.04	0.712864	0.999395	0	-1.35	0.008691	0.385404	0	-1.42	0.002577	0.073124	0	-1.54	0.000234	0.009648	1	-1.58	0.000123	0.00429	1	-1.25	0.049963	0.30326	0	-1.43	0.002048	0.034379	0	-1.44	0.001665	0.025395	0	-1.63	4.1e-05	0.001049	1	-1.62	5.1e-05	0.001114	1	-1.8	2e-06	6.2e-05	1	3
3	FBgn0037782	Niemann-Pick type C-2d	Npc2d	1.03	0.880184	0.999395	0	1.02	0.921945	0.997504	0	-1.21	0.296361	0.733236	0	-1.8	0.001798	0.046701	1	-1.82	0.00147	0.032099	1	-1.43	0.050298	0.304048	0	-1.72	0.003568	0.051537	0	-1.32	0.122171	0.428822	0	-2.13	8.2e-05	0.001828	1	-2.61	1e-06	5.1e-05	1	-2.42	7e-06	0.000215	1	3
3	FBgn0041194	Phosphoribosylamidotransferase 2	Prat2	-1.09	0.425532	0.999395	0	-1.53	0.000223	0.048066	1	-1.58	8.3e-05	0.006345	1	-1.35	0.013061	0.173073	0	-1.67	1.5e-05	0.000774	1	-1.3	0.018232	0.158185	0	-1.39	0.003817	0.054065	0	-1.49	0.000489	0.009561	0	-1.61	5.1e-05	0.001238	1	-1.97	0	3e-06	1	-1.64	2.9e-05	0.000734	1	3
2	FBgn0033132	Tetraspanin 42Ej	Tsp42Ej	1	0.978216	0.999703	0	-1.25	0.076077	0.873932	0	-1.22	0.120512	0.546628	0	-1.48	0.0052	0.097578	0	-1.55	0.000835	0.020402	1	-1.15	0.275459	0.708009	0	1.12	0.374622	0.784267	0	-1.34	0.022291	0.160226	0	-1.66	0.000127	0.002666	1	-1.64	0.000175	0.003125	1	-1.57	0.000564	0.008519	1	2
3	FBgn0019643	Dopamine N acetyltransferase	Dat	1.07	0.496872	0.999395	0	-1.25	0.02295	0.591526	0	-1.29	0.010578	0.172521	0	-1.42	0.000656	0.021435	0	-1.5	9.3e-05	0.003487	1	-1.34	0.003498	0.046961	0	-1.41	0.00086	0.017667	0	-1.35	0.006532	0.069866	0	-1.64	4e-06	0.000144	1	-1.89	0	1e-06	1	-1.52	6.8e-05	0.00152	1	3
3	FBgn0033543	CG12338	CG12338	-1.05	0.576614	0.999395	0	-1.13	0.191319	0.957756	0	-1.35	0.001622	0.053314	0	-1.4	0.000391	0.014565	0	-1.63	1e-06	8.7e-05	1	-1.26	0.012725	0.123038	0	-1.42	0.00026	0.006628	0	-1.36	0.001237	0.020081	0	-1.73	0	7e-06	1	-1.83	0	1e-06	1	-1.53	1.5e-05	0.000426	1	3
3	FBgn0035619	CG10592	CG10592	1.22	0.078312	0.999395	0	-1.12	0.304599	0.968665	0	-1.24	0.053359	0.400052	0	-1.48	0.000765	0.024103	0	-1.68	1.9e-05	0.000938	1	-1.27	0.032656	0.232914	0	-1.38	0.00521	0.06721	0	-1.49	0.000717	0.013046	0	-1.54	0.000229	0.004436	1	-1.52	0.000386	0.005893	1	-1.67	2e-05	0.000537	1	3
3	FBgn0013949	Elastin-like	Ela	1.12	0.278785	0.999395	0	-1.21	0.081399	0.891114	0	-1.28	0.023393	0.265776	0	-1.37	0.005083	0.096346	0	-1.53	0.000221	0.007008	1	-1.1	0.361007	0.781399	0	-1.41	0.002416	0.03874	0	-1.35	0.007367	0.076128	0	-1.66	1.5e-05	0.000447	1	-1.79	1e-06	4.1e-05	1	-1.74	3e-06	0.000103	1	3
3	FBgn0036213	Ribosomal protein L10Ab	RpL10Ab	-1.2	0.183463	0.999395	0	-1.13	0.379556	0.97412	0	-1.23	0.134343	0.567459	0	-1.52	0.003415	0.073591	0	-1.62	0.000825	0.020272	1	-1.32	0.048789	0.299685	0	-1.29	0.065126	0.359397	0	-1.47	0.006494	0.069686	0	-1.95	9e-06	0.000275	1	-2.27	0	6e-06	1	-1.81	5.7e-05	0.001319	1	3
3	FBgn0035258	CG13931	CG13931	1.11	0.539931	0.999395	0	1.14	0.42702	0.97412	0	-1.02	0.918144	0.98603	0	-1.53	0.011777	0.160592	0	-1.74	0.001232	0.027784	1	-1.5	0.015353	0.140076	0	-1.33	0.082308	0.40911	0	-1.54	0.010267	0.096122	0	-1.8	0.000662	0.010738	1	-1.99	8.8e-05	0.001747	1	-1.82	0.000546	0.008312	1	3
3	FBgn0029828	CG6067	CG6067	1.23	0.075765	0.999395	0	-1.01	0.950122	0.99777	0	-1.23	0.074148	0.458237	0	-1.25	0.056704	0.401167	0	-1.6	0.000142	0.004809	1	-1.17	0.170278	0.580495	0	-1.33	0.01615	0.150032	0	-1.48	0.001094	0.018222	0	-1.88	1e-06	3.8e-05	1	-1.98	0	8e-06	1	-1.83	2e-06	8e-05	1	3
3	FBgn0036264	CG11529	CG11529	1.17	0.287601	0.999395	0	1.07	0.63509	0.988335	0	-1.08	0.59552	0.889249	0	-1.6	0.002379	0.056998	0	-1.79	0.000227	0.007192	1	-1.26	0.126363	0.503283	0	-1.47	0.012105	0.123736	0	-1.39	0.031105	0.198678	0	-1.94	3.7e-05	0.000962	1	-2.55	0	2e-06	1	-1.85	0.000111	0.002288	1	3
3	FBgn0038700	CG3734	CG3734	1.04	0.757703	0.999395	0	-1.08	0.551024	0.984159	0	-1.26	0.097461	0.505196	0	-1.35	0.030621	0.287512	0	-1.57	0.001489	0.032385	1	-1.18	0.216316	0.645216	0	-1.35	0.030378	0.22727	0	-1.3	0.061271	0.300748	0	-1.76	0.000102	0.002209	1	-2.55	0	0	1	-1.88	2.1e-05	0.00056	1	3
3	FBgn0002926	nudel	ndl	1.06	0.733257	0.999395	0	-1.31	0.136806	0.940266	0	-1.55	0.017246	0.224853	0	-1.63	0.008046	0.128356	0	-2.19	4.5e-05	0.00191	1	-1.65	0.006861	0.077418	0	-1.22	0.304271	0.733812	0	-1.58	0.012795	0.11228	0	-1.98	0.000314	0.005769	1	-1.81	0.001455	0.01721	1	-2.06	0.000153	0.002948	1	3
3	FBgn0034052	CG8299	CG8299	1.23	0.196544	0.999395	0	-1.24	0.177985	0.950325	0	-1.07	0.692245	0.920914	0	-1.79	0.000588	0.019574	1	-1.55	0.007737	0.112416	0	-1.27	0.140235	0.529255	0	-1.53	0.010153	0.109122	0	-1.32	0.090337	0.370161	0	-1.64	0.002935	0.034268	1	-1.68	0.001979	0.021774	1	-1.71	0.001336	0.017418	1	3
2	FBgn0035982	CG4461	CG4461	-1.04	0.668083	0.999395	0	-1.11	0.268681	0.964139	0	-1.2	0.064691	0.436629	0	-1.32	0.004541	0.089756	0	-1.31	0.006258	0.097231	0	-1.21	0.052173	0.310183	0	-1.22	0.038594	0.263818	0	-1.27	0.014416	0.121941	0	-1.6	7e-06	0.00024	1	-1.62	4e-06	0.000135	1	-1.57	1.5e-05	0.00043	1	2
2	FBgn0036837	CG18135	CG18135	1.03	0.752821	0.999395	0	-1.08	0.469205	0.978931	0	-1.32	0.007949	0.14568	0	-1.21	0.069448	0.442857	0	-1.36	0.003715	0.065838	0	-1.33	0.007645	0.083859	0	-1.34	0.006237	0.077125	0	-1.41	0.001226	0.019923	0	-1.54	8.6e-05	0.001897	1	-1.52	0.000133	0.002491	1	-1.58	3.7e-05	0.000897	1	2
2	FBgn0002526	Laminin A	LanA	1.13	0.18976	0.999395	0	-1	0.962093	0.99777	0	-1.25	0.014191	0.203136	0	-1.42	0.000216	0.009129	0	-1.36	0.001043	0.024343	0	-1.32	0.002883	0.040888	0	-1.22	0.029124	0.220528	0	-1.27	0.009366	0.090722	0	-1.51	2.4e-05	0.000676	1	-1.51	9.9e-05	0.001926	1	-1.66	1e-06	2.3e-05	1	2
2	FBgn0035917	Z band alternatively spliced PDZ-motif protein 66	Zasp66	-1.23	0.021099	0.957371	0	-1.35	0.000956	0.117492	0	-1.37	0.000607	0.02697	0	-1.43	0.000128	0.006153	0	-1.43	0.000111	0.003926	0	-1.49	2.3e-05	0.000795	0	-1.45	7.3e-05	0.002334	0	-1.48	0.000496	0.009669	0	-1.83	0	0	1	-2.18	0	0	1	-1.93	0	0	1	2
3	FBgn0036602	CG13042	CG13042	1.07	0.506128	0.999395	0	1.1	0.331179	0.968993	0	-1.09	0.378468	0.786182	0	-1.23	0.035372	0.311906	0	-1.27	0.016515	0.186179	0	-1.37	0.002	0.030986	0	-1.4	0.001028	0.020379	0	-1.41	0.000771	0.013905	0	-1.72	1e-06	3e-05	1	-1.63	5e-06	0.000142	1	-1.51	8.1e-05	0.001776	1	3
3	FBgn0023516	CG14815	CG14815	1	0.969708	0.999703	0	-1.05	0.469471	0.978931	0	-1.11	0.132395	0.566681	0	-1.27	0.00077	0.024168	0	-1.39	9e-06	0.000515	0	-1.2	0.008762	0.093032	0	-1.35	4e-05	0.001387	0	-1.43	2e-06	0.000103	0	-1.63	0	0	1	-1.75	0	0	1	-1.53	0	3e-06	1	3
3	FBgn0033562	CG6751	CG6751	-1.03	0.703941	0.999395	0	-1.12	0.200538	0.957756	0	-1.26	0.008648	0.155303	0	-1.25	0.018991	0.217835	0	-1.39	0.000234	0.007346	0	-1.23	0.016679	0.149396	0	-1.33	0.00119	0.022877	0	-1.38	0.000331	0.00682	0	-1.57	2e-06	6.3e-05	1	-1.8	0	0	1	-1.59	1e-06	3.9e-05	1	3
3	FBgn0040797	CG13066	CG13066	-1.04	0.64612	0.999395	0	1.17	0.067798	0.848768	0	-1.06	0.448998	0.826274	0	-1.27	0.005895	0.106045	0	-1.29	0.003007	0.056094	0	-1.49	1.1e-05	0.00044	0	-1.45	3.4e-05	0.001202	0	-1.44	4.3e-05	0.001288	0	-1.59	1e-06	2.7e-05	1	-1.59	1e-06	2.4e-05	1	-1.6	0	2e-05	1	3
3	FBgn0030218	CG1628	CG1628	1.39	0.002562	0.624502	0	1.05	0.64778	0.988335	0	-1.15	0.18495	0.628371	0	-1.23	0.050775	0.37457	0	-1.31	0.012654	0.156924	0	-1.2	0.093068	0.427911	0	-1.34	0.006795	0.081872	0	-1.37	0.003938	0.047392	0	-1.74	2e-06	8.4e-05	1	-1.78	1e-06	3.9e-05	1	-1.62	2.4e-05	0.000622	1	3
3	FBgn0037039	CG10587	CG10587	1.14	0.386489	0.999395	0	1.13	0.403221	0.97412	0	-1.16	0.331745	0.760069	0	-1.56	0.004072	0.083771	0	-1.58	0.003094	0.057276	0	-1.33	0.058907	0.33148	0	-1.52	0.006453	0.078902	0	-1.39	0.029139	0.189512	0	-1.77	0.000302	0.005587	1	-2	7.5e-05	0.001534	1	-1.64	0.001452	0.018612	1	3
3	FBgn0039204	CG6607	CG6607	-1.09	0.422839	0.999395	0	-1.01	0.909435	0.997504	0	1.05	0.675338	0.915037	0	-1.19	0.116356	0.562026	0	-1.36	0.007229	0.107256	0	-1.24	0.053649	0.314831	0	-1.38	0.004298	0.058916	0	-1.45	0.00116	0.019079	0	-1.89	0	1.5e-05	1	-2.06	0	1e-06	1	-1.65	2.7e-05	0.000698	1	3
3	FBgn0005614	trp-like	trpl	1.01	0.956289	0.999703	0	-1.13	0.255955	0.964139	0	-1.28	0.029451	0.301274	0	-1.26	0.03902	0.331553	0	-1.31	0.016864	0.188267	0	-1.43	0.001722	0.027591	0	-1.49	0.00058	0.012713	0	-1.49	0.000606	0.011388	0	-1.78	2e-06	9e-05	1	-1.73	6e-06	0.000175	1	-1.67	1.7e-05	0.00047	1	3
3	FBgn0051233	CG31233	CG31233	1.29	0.020365	0.957371	0	1.2	0.090873	0.903485	0	-1.07	0.532518	0.862395	0	-1.22	0.062875	0.421251	0	-1.35	0.006756	0.102904	0	-1.33	0.009656	0.099709	0	-1.33	0.009213	0.101427	0	-1.46	0.000771	0.013905	0	-1.67	1.1e-05	0.000349	1	-1.89	0	7e-06	1	-1.68	3.6e-05	0.000882	1	3
3	FBgn0045495	Gustatory receptor 28b	Gr28b	1.06	0.738274	0.999395	0	1.15	0.419087	0.97412	0	1.01	0.940407	0.986316	0	-1.34	0.085911	0.49432	0	-1.37	0.065164	0.428808	0	-1.37	0.064429	0.350835	0	-1.52	0.01509	0.143632	0	-1.52	0.015312	0.126751	0	-1.7	0.002396	0.02947	1	-2	0.000107	0.002081	1	-1.69	0.002799	0.031334	1	3
3	FBgn0052550			-1.06	0.561129	0.999395	0	1.12	0.224678	0.958583	0	-1.1	0.340843	0.765584	0	-1.24	0.02732	0.268249	0	-1.3	0.008807	0.122501	0	-1.4	0.000925	0.016983	0	-1.47	0.000177	0.004899	0	-1.45	0.000292	0.006192	0	-1.72	0	2.1e-05	1	-1.77	0	8e-06	1	-1.69	1e-06	4e-05	1	3
3	FBgn0037819	CG14688	CG14688	1.08	0.585167	0.999395	0	1.05	0.73989	0.989291	0	-1.12	0.379451	0.786651	0	-1.45	0.006764	0.114729	0	-1.36	0.024542	0.2367	0	-1.42	0.009834	0.101162	0	-1.36	0.024692	0.197504	0	-1.27	0.077982	0.343693	0	-1.77	6e-05	0.001421	1	-1.76	7.5e-05	0.001526	1	-1.72	0.000138	0.002717	1	3
3	FBgn0031417	CG3597	CG3597	1.15	0.234185	0.999395	0	1.04	0.709738	0.988335	0	-1.09	0.470791	0.838466	0	-1.16	0.205418	0.690771	0	-1.34	0.012345	0.154112	0	-1.24	0.062857	0.345137	0	-1.28	0.036041	0.252942	0	-1.28	0.035969	0.216434	0	-1.74	8e-06	0.000267	1	-2.04	0	2e-06	1	-1.72	1.1e-05	0.000339	1	3
3	FBgn0039905	CG2052	CG2052	-1.15	0.271634	0.999395	0	-1.18	0.203616	0.957756	0	-1.37	0.015819	0.214027	0	-1.48	0.003211	0.070349	0	-1.35	0.021531	0.21803	0	-1.23	0.103123	0.454749	0	-1.08	0.556767	0.885945	0	-1.47	0.003632	0.045002	0	-1.66	0.000182	0.003636	1	-1.87	7e-06	0.000195	1	-1.73	6.4e-05	0.001455	1	3
3	FBgn0031646	CG2837	CG2837	-1.05	0.751881	0.999395	0	-1.12	0.441514	0.974172	0	-1.23	0.149063	0.584643	0	-1.23	0.145326	0.615556	0	-1.44	0.013135	0.160312	0	-1.13	0.41304	0.815553	0	-1.29	0.079124	0.40096	0	-1.44	0.013436	0.116272	0	-1.62	0.001241	0.017629	1	-1.87	5.1e-05	0.001114	1	-1.73	0.000319	0.005311	1	3
3	FBgn0032068	CG9466	CG9466	1.29	0.034854	0.998166	0	-1.07	0.549527	0.984159	0	-1.24	0.073398	0.456826	0	-1.43	0.002941	0.065532	0	-1.48	0.001254	0.028127	0	-1.45	0.00207	0.03179	0	-1.42	0.003767	0.053476	0	-1.32	0.020547	0.152333	0	-1.72	2e-05	0.000583	1	-1.69	3.1e-05	0.000739	1	-1.74	1.4e-05	0.000403	1	3
3	FBgn0039040	CG13833	CG13833	-1.05	0.705643	0.999395	0	-1.07	0.608984	0.988335	0	-1.53	0.002732	0.074882	0	-1.38	0.020786	0.229953	0	-1.25	0.106023	0.550423	0	-1.29	0.063817	0.348804	0	-1.24	0.115721	0.485373	0	-1.47	0.01204	0.1073	0	-1.6	0.000929	0.013867	1	-1.81	0.000189	0.003333	1	-1.74	0.000128	0.002568	1	3
3	FBgn0030075			1.31	0.044622	0.999395	0	-1.17	0.234	0.959975	0	-1.23	0.122059	0.549527	0	-1.21	0.148536	0.621422	0	-1.48	0.00442	0.07448	0	-1.19	0.197876	0.623141	0	-1.33	0.036014	0.252942	0	-1.38	0.018538	0.142333	0	-1.67	0.000295	0.005467	1	-1.78	5.8e-05	0.001238	1	-1.74	9.4e-05	0.002014	1	3
3	FBgn0027364	Six4	Six4	1.04	0.710971	0.999395	0	-1.08	0.428482	0.974172	0	-1.17	0.125767	0.557027	0	-1.48	0.000242	0.009901	0	-1.38	0.002233	0.044548	0	-1.16	0.138716	0.52685	0	-1.26	0.025603	0.201646	0	-1.28	0.015763	0.128703	0	-1.71	1e-06	5.8e-05	1	-1.77	0	1.8e-05	1	-1.77	0	1.8e-05	1	3
3	FBgn0037762	elongase F	eloF	1.17	0.388989	0.999395	0	-1.07	0.701953	0.988335	0	-1.42	0.061257	0.42492	0	-1.68	0.006691	0.113931	0	-1.64	0.00972	0.131182	0	1.1	0.604561	0.893663	0	-1.09	0.653958	0.919094	0	-1.3	0.168322	0.503549	0	-1.79	0.002695	0.032208	1	-2.55	5e-06	0.000143	1	-1.79	0.002673	0.030266	1	3
3	FBgn0003189	rudimentary	r	-1.01	0.938636	0.999703	0	-1.02	0.778724	0.991978	0	-1.09	0.290843	0.730441	0	-1.13	0.164422	0.640808	0	-1.17	0.058757	0.404744	0	-1.39	0.000126	0.003339	0	-1.48	1e-05	0.000426	0	-1.5	6e-06	0.000216	0	-1.66	0	3e-06	1	-1.78	0	0	1	-1.79	0	0	1	3
3	FBgn0029948	CheA7a	CheA7a	-1.02	0.865499	0.999395	0	1.02	0.901478	0.997504	0	-1.16	0.29981	0.736085	0	-1.11	0.455261	0.870491	0	-1.34	0.043881	0.343163	0	-1.41	0.016878	0.150308	0	-1.53	0.003522	0.051369	0	-1.4	0.033026	0.205259	0	-1.71	0.000344	0.006198	1	-2.62	0	0	1	-1.8	0.000104	0.002171	1	3
3	FBgn0039052	CG6733	CG6733	1	0.976694	0.999703	0	-1.02	0.905673	0.997504	0	1.06	0.70194	0.924364	0	-1.32	0.062953	0.421341	0	-1.56	0.003957	0.068887	0	-1.2	0.229492	0.661896	0	-1.41	0.023088	0.188126	0	-1.55	0.008556	0.084818	0	-1.94	3.2e-05	0.000858	1	-2.19	2e-06	5.7e-05	1	-1.85	9.9e-05	0.002089	1	3
3	FBgn0036091	CG18628	CG18628	-1.4	0.077074	0.999395	0	-1.18	0.379454	0.97412	0	-1.26	0.215526	0.663019	0	-1.29	0.176279	0.657544	0	-1.49	0.035708	0.302631	0	-1.18	0.368763	0.784487	0	-1.35	0.116607	0.487067	0	-1.69	0.006507	0.069712	0	-1.94	0.000729	0.011608	1	-3.17	0	3e-06	1	-1.87	0.001411	0.018292	1	3
3	FBgn0037288	CG14661	CG14661	1.16	0.125011	0.999395	0	-1.15	0.140982	0.946789	0	-1.42	0.000508	0.024251	0	-1.46	0.000212	0.008977	0	-1.49	0.000111	0.003935	0	-1.37	0.001816	0.028729	0	-1.39	0.001195	0.022929	0	-1.39	0.001192	0.019464	0	-1.53	4.1e-05	0.001045	1	-1.51	7e-05	0.001451	1	-1.87	0	1e-06	1	3
3	FBgn0052283	drosomycin-3	dro3	-1.22	0.19499	0.999395	0	1.06	0.717565	0.988335	0	-1.24	0.171956	0.608413	0	-1.41	0.027895	0.270613	0	-1.29	0.099427	0.535051	0	-1.13	0.432809	0.822642	0	-1.15	0.369912	0.781048	0	-1.53	0.007354	0.076061	0	-1.58	0.004233	0.045111	1	-2.35	1e-06	2.5e-05	1	-1.88	0.000119	0.002405	1	3
3	FBgn0051681	CG31681	CG31681	1.14	0.414147	0.999395	0	-1.05	0.774884	0.991602	0	-1.39	0.046975	0.375829	0	-1.36	0.06168	0.417888	0	-1.52	0.01242	0.154754	0	1.01	0.963579	0.990092	0	-1.05	0.776969	0.95464	0	-1.62	0.004455	0.052148	0	-1.7	0.001762	0.023106	1	-2.08	3.1e-05	0.000732	1	-1.96	0.000111	0.002291	1	3
3	FBgn0003517	stubarista	sta	1.09	0.425725	0.999395	0	1.13	0.240592	0.960504	0	-1.05	0.613474	0.894398	0	-1.19	0.097499	0.523112	0	-1.44	0.000775	0.019266	0	-1.2	0.083038	0.403973	0	-1.39	0.002266	0.036908	0	-1.41	0.00156	0.024074	0	-2.05	0	0	1	-2.59	0	0	1	-2	0	1e-06	1	3
3	FBgn0003517	stubarista	sta	1.02	0.857094	0.999395	0	1.11	0.336012	0.969629	0	-1.01	0.904129	0.984014	0	-1.16	0.188562	0.67046	0	-1.39	0.004065	0.069942	0	-1.2	0.10442	0.457382	0	-1.36	0.007087	0.084388	0	-1.38	0.004959	0.056291	0	-2.05	0	1e-06	1	-2.55	0	0	1	-2.04	0	1e-06	1	3
3	FBgn0037678	CG16749	CG16749	1.33	0.087817	0.999395	0	-1.03	0.874722	0.997504	0	1.03	0.85193	0.971945	0	-1.17	0.357817	0.81914	0	-1.54	0.012065	0.151333	0	-1.14	0.42407	0.818341	0	-1.53	0.01271	0.127772	0	-1.4	0.045302	0.251797	0	-2.1	3.4e-05	0.000899	1	-2.93	0	1e-06	1	-2.05	5.9e-05	0.001351	1	3
3	FBgn0024997	CG2681	CG2681	1.12	0.508442	0.999395	0	-1.18	0.33397	0.969629	0	-1.26	0.188502	0.632826	0	-1.5	0.021571	0.233477	0	-1.37	0.07083	0.446335	0	-1.23	0.230731	0.663376	0	-1.45	0.035322	0.250972	0	-1.22	0.245415	0.599293	0	-1.73	0.002194	0.027392	1	-2.1	6.2e-05	0.00131	1	-2.19	2.5e-05	0.000642	1	3
3	FBgn0031249	CG11911	CG11911	1.1	0.630841	0.999395	0	-1.04	0.840103	0.996045	0	-1.31	0.154057	0.589554	0	-1.67	0.009027	0.138383	0	-1.78	0.003391	0.061392	0	-1.54	0.025677	0.199604	0	-1.44	0.057018	0.332939	0	-1.28	0.204294	0.551493	0	-2.06	0.000327	0.005971	1	-2.38	2.6e-05	0.000624	1	-2.27	6.3e-05	0.001428	1	3
3	FBgn0003863	alphaTrypsin	alphaTry	1.38	0.114114	0.999395	0	1.21	0.555364	0.984159	0	-1.15	0.501192	0.851185	0	1.27	0.36524	0.823225	0	-1.86	0.02167	0.21811	0	-1.55	0.058813	0.331233	0	-1.64	0.063948	0.354831	0	-1.59	0.046609	0.25635	0	-2.24	0.001061	0.015477	1	-2.71	0.000512	0.007395	1	-2.43	0.000385	0.006168	1	3
6	FBgn0032947			1.1	0.493827	0.999395	0	1.06	0.639545	0.988335	0	-1.06	0.671367	0.914181	0	-1.37	0.022079	0.237483	0	-1.42	0.01062	0.138495	0	-1.09	0.521379	0.86097	0	-1.26	0.088636	0.424605	0	-1.16	0.27607	0.629974	0	-1.51	0.002895	0.034002	1	-1.67	0.000308	0.004943	1	-1.51	0.003082	0.033676	1	6
6	FBgn0030737	CG9914	CG9914	1.25	0.033228	0.973527	0	1.11	0.336733	0.969629	0	1.01	0.928284	0.986316	0	-1	0.973456	0.996634	0	-1.07	0.539952	0.924097	0	-1.04	0.703037	0.92899	0	-1.24	0.042807	0.280786	0	-1.39	0.002675	0.035947	0	-1.65	1.2e-05	0.000373	1	-1.72	3e-06	8.8e-05	1	-1.52	0.000164	0.003126	1	6
6	FBgn0040349	CG3699	CG3699	-1.05	0.711917	0.999395	0	1.04	0.776528	0.991978	0	-1.04	0.769207	0.945481	0	-1.03	0.82127	0.97346	0	-1.18	0.239749	0.767436	0	-1.14	0.364215	0.783042	0	-1.07	0.618616	0.90818	0	-1.09	0.618812	0.859157	0	-1.76	0.000188	0.003749	1	-2.44	0	2e-06	1	-1.53	0.003763	0.038407	1	6
6	FBgn0032524	CG9267	CG9267	1.04	0.667232	0.999395	0	-1	0.976073	0.998221	0	-1.02	0.852388	0.971945	0	-1.1	0.273624	0.758265	0	-1.23	0.01659	0.186313	0	-1.24	0.012318	0.120327	0	-1.31	0.002087	0.034822	0	-1.28	0.004329	0.050942	0	-1.6	1e-06	2.6e-05	1	-1.65	0	7e-06	1	-1.53	4e-06	0.000131	1	6
6	FBgn0035154	CG3344	CG3344	1.14	0.369124	0.999395	0	1.03	0.850987	0.996946	0	1.07	0.662856	0.911182	0	-1.2	0.217629	0.704266	0	-1.28	0.08713	0.499924	0	1.01	0.958497	0.989289	0	-1.15	0.387611	0.793001	0	-1.33	0.049535	0.266094	0	-1.62	0.001476	0.020191	1	-2.12	3e-06	8.1e-05	1	-1.53	0.004299	0.042422	1	6
6	FBgn0035332	CG13801	CG13801	-1.08	0.423527	0.999395	0	1.02	0.800134	0.99325	0	-1.12	0.246658	0.694463	0	-1.18	0.086587	0.494907	0	-1.25	0.023267	0.228418	0	-1.26	0.018975	0.162495	0	-1.33	0.004247	0.058286	0	-1.44	0.000304	0.006356	0	-1.57	1.6e-05	0.000483	1	-1.68	1e-06	4.1e-05	1	-1.54	3.3e-05	0.000821	1	6
6	FBgn0030840	presidents-cup	p-cup	1.24	0.130588	0.999395	0	-1.11	0.464086	0.977997	0	1.18	0.23916	0.686469	0	1.06	0.689804	0.94757	0	-1.09	0.541067	0.924097	0	-1.08	0.565875	0.878118	0	-1.39	0.023944	0.192857	0	-1.39	0.021603	0.157262	0	-1.64	0.000915	0.013711	1	-1.95	1.5e-05	0.000386	1	-1.54	0.003467	0.03637	1	6
6	FBgn0031865	Na[+]/H[+] hydrogen antiporter 1	Nha1	1.02	0.670667	0.999395	0	1.14	0.022313	0.588232	0	-1.05	0.351191	0.769786	0	-1.24	0.000249	0.010116	0	-1.32	4e-06	0.000274	0	-1.35	1e-06	6.1e-05	0	-1.37	0	3.4e-05	0	-1.44	0	1e-06	0	-1.63	0	0	1	-1.54	0	0	1	-1.54	0	0	1	6
6	FBgn0035091	CG3829	CG3829	1.3	0.022382	0.957371	0	-1.09	0.43367	0.974172	0	-1.03	0.769774	0.945481	0	-1.1	0.374849	0.828571	0	-1.31	0.018323	0.198796	0	-1.03	0.76067	0.94357	0	-1.24	0.082335	0.40911	0	-1.32	0.015561	0.127843	0	-1.67	2.2e-05	0.000634	1	-1.95	0	6e-06	1	-1.56	0.000197	0.00363	1	6
6	FBgn0032022	CG14275	CG14275	-1.09	0.555115	0.999395	0	-1.19	0.234534	0.959975	0	-1.26	0.118203	0.542711	0	-1.25	0.135483	0.598632	0	-1.39	0.027329	0.255685	0	1.09	0.545139	0.869411	0	1.05	0.748739	0.94657	0	-1.35	0.044003	0.24708	0	-1.67	0.000829	0.012731	1	-2.22	1e-06	3.6e-05	1	-1.57	0.002969	0.032764	1	6
6	FBgn0016075	viking	vkg	1.21	0.064522	0.999395	0	1.1	0.331948	0.969011	0	1.08	0.465428	0.836828	0	-1.14	0.197968	0.678509	0	-1.24	0.036301	0.305137	0	-1.08	0.442248	0.827077	0	-1.18	0.105693	0.463886	0	-1.28	0.020382	0.151665	0	-1.52	0.000135	0.002814	1	-1.7	3e-06	9.4e-05	1	-1.58	3.7e-05	0.000897	1	6
6	FBgn0052209			1.21	0.027822	0.964922	0	1.06	0.469757	0.978931	0	-1	0.967099	0.992623	0	-1.17	0.064523	0.425779	0	-1.26	0.007032	0.105169	0	-1.13	0.152008	0.550454	0	-1.27	0.006668	0.080633	0	-1.23	0.050447	0.268253	0	-1.54	3e-06	0.000111	1	-1.72	0	1e-06	1	-1.58	1e-06	4.2e-05	1	6
6	FBgn0000100	Ribosomal protein LP0	RpLP0	1.09	0.311586	0.999395	0	1.11	0.226006	0.958634	0	1.01	0.862215	0.973416	0	-1.08	0.380752	0.831068	0	-1.15	0.109063	0.557937	0	-1.3	0.002412	0.035775	0	-1.36	0.000614	0.013331	0	-1.35	0.000627	0.011702	0	-1.64	0	1.2e-05	1	-1.78	0	0	1	-1.6	1e-06	2.3e-05	1	6
6	FBgn0053003	CG33003	CG33003	1.13	0.33265	0.999395	0	-1.07	0.563741	0.984159	0	-1.12	0.338433	0.76398	0	-1.34	0.019335	0.219908	0	-1.48	0.002063	0.04178	0	-1.05	0.71716	0.931115	0	-1.27	0.055599	0.329027	0	-1.4	0.007983	0.080486	0	-1.55	0.000659	0.010724	1	-1.73	3.7e-05	0.000849	1	-1.61	0.000248	0.004365	1	6
6	FBgn0032069	CG9468	CG9468	1.28	0.039181	0.999395	0	-1.1	0.422859	0.97412	0	-1.25	0.059392	0.421179	0	-1.38	0.007287	0.121094	0	-1.44	0.002624	0.050459	0	-1.18	0.157996	0.561464	0	-1.17	0.181177	0.597903	0	-1.12	0.3437	0.69336	0	-1.52	0.00064	0.010546	1	-1.53	0.00056	0.007924	1	-1.64	7.8e-05	0.001709	1	6
6	FBgn0000071	Amalgam	Ama	-1.18	0.170127	0.999395	0	-1.01	0.960796	0.99777	0	1.02	0.883293	0.97903	0	-1.14	0.257346	0.744216	0	-1.36	0.010899	0.141017	0	-1.26	0.051633	0.308508	0	-1.31	0.023491	0.190379	0	-1.26	0.075506	0.337708	0	-1.66	5e-05	0.001229	1	-1.98	0	9e-06	1	-1.65	6.5e-05	0.001465	1	6
6	FBgn0034490	CG9864	CG9864	1.36	0.00811	0.802165	0	1.11	0.340522	0.969629	0	1.08	0.476347	0.841286	0	-1.22	0.086749	0.494992	0	-1.31	0.020484	0.211664	0	-1.12	0.309301	0.738291	0	-1.2	0.104536	0.461143	0	-1.28	0.031359	0.19952	0	-1.64	5.1e-05	0.001243	1	-1.9	0	1.7e-05	1	-1.67	3e-05	0.000755	1	6
6	FBgn0011582	Dopamine receptor	DopR	1.3	0.001899	0.531117	0	1.11	0.187845	0.957751	0	1.01	0.865014	0.973506	0	-1.23	0.015309	0.190931	0	-1.27	0.004299	0.07292	0	-1.19	0.038731	0.257258	0	-1.3	0.002012	0.033856	0	-1.42	5.9e-05	0.001672	0	-1.64	0	6e-06	1	-1.65	0	4e-06	1	-1.67	0	2e-06	1	6
6	FBgn0038845	CG10827	CG10827	1.17	0.070291	0.999395	0	-1	0.997695	0.999475	0	-1.2	0.038784	0.344015	0	-1.24	0.016338	0.2009	0	-1.39	0.000336	0.009798	0	-1.17	0.068989	0.366669	0	-1.23	0.017002	0.155419	0	-1.27	0.007683	0.078531	0	-1.55	3e-06	0.000113	1	-1.7	0	3e-06	1	-1.67	0	7e-06	1	6
6	FBgn0020508	Antigen 5-related 2	Ag5r2	1.04	0.814817	0.999395	0	-1.02	0.894344	0.997504	0	1.3	0.148336	0.583621	0	-1.02	0.927231	0.992574	0	-1.17	0.376672	0.870186	0	-1.23	0.291086	0.720181	0	-1.58	0.013429	0.13313	0	-1.31	0.139117	0.457478	0	-1.82	0.001587	0.021398	1	-1.95	0.000479	0.006967	1	-1.69	0.005111	0.048285	1	6
6	FBgn0003486	spook	spo	1.36	0.05722	0.999395	0	1.03	0.859405	0.996946	0	-1.1	0.491533	0.846475	0	1.08	0.570672	0.916625	0	-1.36	0.037345	0.309913	0	-1.28	0.093829	0.430216	0	-1.42	0.017653	0.158608	0	-1.13	0.385391	0.725574	0	-1.55	0.003178	0.036278	1	-1.81	0.00012	0.002284	1	-1.71	0.001177	0.015681	1	6
6	FBgn0034807	CG9897	CG9897	1.13	0.353351	0.999395	0	1.03	0.852267	0.996946	0	-1.28	0.070366	0.449717	0	-1.08	0.584591	0.920819	0	-1.34	0.032131	0.281843	0	-1.04	0.744891	0.939652	0	-1.08	0.564864	0.889449	0	-1.24	0.111126	0.406895	0	-1.7	0.00018	0.003605	1	-2.07	1e-06	3.5e-05	1	-1.75	9.1e-05	0.001965	1	6
6	FBgn0052232	CG32232	CG32232	1.32	0.005074	0.687611	0	1.15	0.133497	0.940266	0	1.04	0.699648	0.923309	0	-1.21	0.049864	0.372633	0	-1.33	0.003722	0.065838	0	-1.17	0.096749	0.438691	0	-1.21	0.045851	0.291467	0	-1.3	0.008283	0.082795	0	-1.57	1.1e-05	0.000356	1	-1.78	0	4e-06	1	-1.75	0	9e-06	1	6
6	FBgn0016675	Galactose-specific C-type lectin	Lectin-galC1	1.35	0.112394	0.999395	0	1.32	0.14865	0.947216	0	1.03	0.858946	0.973101	0	-1	0.999255	0.999483	0	-1.15	0.459815	0.903502	0	1.11	0.569932	0.879075	0	-1.04	0.818248	0.965068	0	-1.4	0.081017	0.350088	0	-2.07	0.000262	0.004961	1	-2.57	5e-06	0.000152	1	-2.06	0.000297	0.005047	1	6
7	FBgn0040862	CG12714	CG12714	1.12	0.580832	0.999395	0	-1.04	0.859028	0.996946	0	-1.05	0.800031	0.952511	0	1.45	0.138451	0.605838	0	1.5	0.048248	0.362408	0	1.42	0.118958	0.487567	0	1.61	0.058104	0.336415	0	1.68	0.012971	0.11337	0	2	0.002817	0.033249	1	1.99	0.003045	0.030025	1	2.26	0.000171	0.003233	1	7
7	FBgn0031897	CG13784	CG13784	1.04	0.68681	0.999395	0	1.03	0.754779	0.989815	0	1.02	0.831481	0.966052	0	1.15	0.147958	0.619793	0	1.3	0.008673	0.121032	0	1.21	0.05406	0.316393	0	1.25	0.035937	0.25289	0	1.21	0.055393	0.2819	0	1.62	6e-06	0.000203	1	1.64	4e-06	0.000118	1	1.68	1e-06	5e-05	1	7
7	FBgn0030608	Lipid storage droplet-2	Lsd-2	1.06	0.703337	0.999395	0	1.21	0.229463	0.958634	0	1.21	0.225244	0.672916	0	1.36	0.053925	0.388822	0	1.34	0.067798	0.437333	0	1.34	0.066403	0.357825	0	1.42	0.029146	0.220563	0	1.47	0.028255	0.185522	0	1.75	0.000734	0.011638	1	1.81	0.000393	0.005982	1	1.59	0.004476	0.043939	1	7
7	FBgn0030301	Heterochromatin protein 5	HP5	-1.1	0.443982	0.999395	0	1.18	0.169141	0.949455	0	1.19	0.146431	0.580767	0	1.3	0.032634	0.298106	0	1.37	0.009657	0.130602	0	1.44	0.003233	0.044449	0	1.35	0.014967	0.142665	0	1.37	0.009285	0.090132	0	1.55	0.000498	0.00852	1	1.82	5e-06	0.000142	1	1.57	0.00035	0.005761	1	7
7	FBgn0029738	CG4068	CG4068	1.1	0.492344	0.999395	0	1.2	0.210148	0.957756	0	1.28	0.088967	0.492202	0	1.18	0.262965	0.749896	0	1.28	0.096031	0.524005	0	1.27	0.104033	0.457102	0	1.29	0.08031	0.404188	0	1.53	0.004787	0.054999	0	1.78	0.000191	0.003785	1	1.88	5.3e-05	0.001157	1	1.55	0.003743	0.038346	1	7
5	FBgn0033830	CG10814	CG10814	1.13	0.658348	0.999395	0	1.83	0.01486	0.485219	0	2.76	8.9e-05	0.006694	1	2.21	0.001706	0.044668	1	2.29	0.001061	0.024728	1	4.2	0	1.2e-05	1	3.37	5e-06	0.00023	1	2.24	0.001423	0.022287	1	1.9	0.018278	0.120856	0	2.16	0.002204	0.023592	1	2.25	0.001323	0.017307	1	5
5	FBgn0030444	CG18646	CG18646	-1.02	0.934305	0.999703	0	1.05	0.896621	0.997504	0	-1.39	0.22931	0.675186	0	2.67	0.00168	0.044323	1	4.93	0	2.7e-05	1	2.93	0.000219	0.005334	1	2.78	0.000417	0.009835	1	2.58	0.000981	0.016572	1	2.1	0.008408	0.072858	0	2.88	0.000268	0.004437	1	2.81	0.000365	0.005944	1	5
5	FBgn0032442	CG15485	CG15485	-1.26	0.124304	0.999395	0	1.22	0.186952	0.956966	0	2.16	4e-06	0.000601	1	1.41	0.039599	0.33367	0	1.62	0.002347	0.04626	1	2.05	1.4e-05	0.00053	1	1.78	0.000321	0.007893	1	1.79	0.000919	0.015788	1	1.31	0.078893	0.292252	0	1.58	0.003767	0.035146	1	2.06	1.2e-05	0.000341	1	5
5	FBgn0037831	Chromosome associated protein H2	Cap-H2	-1.05	0.676161	0.999395	0	-1.15	0.241858	0.960504	0	1.06	0.592811	0.888135	0	1.47	0.001351	0.037784	0	1.86	1e-06	0.000105	1	2.28	0	0	1	1.81	3e-06	0.000166	1	1.68	3.5e-05	0.001075	1	1.49	0.001044	0.015266	0	1.97	0	1e-05	1	1.64	7.2e-05	0.0016	1	5
2	FBgn0032037	CG13394	CG13394	-1.31	0.046741	0.999395	0	1.06	0.660888	0.988335	0	-1.6	0.000882	0.034442	1	-1.16	0.284295	0.767335	0	-1.6	0.000855	0.020821	1	-1.52	0.002626	0.038263	1	-1.13	0.376686	0.785709	0	-1.72	0.000488	0.009552	1	-1.31	0.050478	0.227158	0	-1.52	0.00257	0.026394	1	-1.58	0.002744	0.030931	1	2
3	FBgn0039091	CG10182	CG10182	-1.04	0.719375	0.999395	0	1.06	0.614592	0.988335	0	-1.28	0.030288	0.306049	0	-1.87	4e-06	0.000349	1	-1.34	0.010642	0.138554	0	-1.56	0.000209	0.005138	1	-1.35	0.010161	0.109122	0	-1.56	0.000219	0.004899	1	-1.49	0.000811	0.01252	0	-1.77	4e-06	0.000131	1	-1.57	0.000153	0.002951	1	3
1	FBgn0040984	CG4440	CG4440	-1.55	0.096662	0.999395	0	-3.95	3e-06	0.00184	1	-3.22	0.00015	0.009642	1	-1.26	0.372503	0.827308	0	-1.55	0.099921	0.535234	0	-3.39	0.002049	0.031494	1	-2.04	0.008234	0.093468	0	-2.47	0.002587	0.035121	1	-1.88	0.030953	0.169102	0	-2.42	0.003425	0.032861	1	-2.22	0.003405	0.035927	1	1
1	FBgn0033721	CG13159	CG13159	-1.19	0.540986	0.999395	0	1.26	0.421917	0.97412	0	-1.01	0.961148	0.99089	0	1.14	0.616663	0.929819	0	-1.56	0.097877	0.531402	0	-4.5	0.00018	0.004533	1	-1.83	0.041105	0.275316	0	-3.25	0.003184	0.040668	1	-2.07	0.030156	0.166417	0	-3.18	6.2e-05	0.001306	1	-3.06	0.001285	0.016945	1	1
3	FBgn0037170	thioredoxin reductase 2	Trxr-2	-1.12	0.57191	0.999395	0	-1.14	0.516064	0.981307	0	-1.45	0.085135	0.482161	0	-1.11	0.651594	0.938881	0	-1.71	0.007659	0.111986	0	-1.9	0.001699	0.027475	1	-1.43	0.070463	0.375145	0	-2.06	0.001339	0.021332	1	-1.43	0.070083	0.272629	0	-2.2	0.000159	0.00289	1	-2	0.000793	0.011328	1	3
2	FBgn0033604			-1.26	0.064072	0.999395	0	-1.01	0.947143	0.99777	0	-1.45	0.003405	0.085416	0	1.02	0.910062	0.990273	0	-1.51	0.001389	0.030632	1	-1.5	0.001692	0.027431	0	-1.32	0.024841	0.198347	0	-1.61	0.000236	0.005197	1	-1.39	0.008636	0.073691	0	-1.81	9e-06	0.000257	1	-1.52	0.001102	0.014892	1	2
3	FBgn0035315	CG8960	CG8960	-1.09	0.680039	0.999395	0	-1.09	0.638177	0.988335	0	-1.17	0.454051	0.829484	0	-1.2	0.333848	0.801264	0	-1.62	0.013132	0.160312	0	-1.51	0.07557	0.384282	0	-1.61	0.014169	0.137859	0	-2.39	2.5e-05	0.000803	1	-2.07	0.008529	0.073371	0	-1.96	0.000728	0.009849	1	-2.38	0.000103	0.002163	1	3
6	FBgn0034769	Odorant-binding protein 58c	Obp58c	1.09	0.524973	0.999395	0	1.08	0.577569	0.985816	0	1.02	0.90677	0.984025	0	-1.22	0.135357	0.598424	0	-1.31	0.045763	0.352196	0	-1.27	0.07999	0.394843	0	-1.31	0.043833	0.284819	0	-1.55	0.001655	0.025262	1	-1.37	0.021146	0.131859	0	-1.59	0.000809	0.010702	1	-1.52	0.002415	0.02802	1	6
3	FBgn0031103	CG12679	CG12679	1.15	0.338412	0.999395	0	1.05	0.728199	0.988753	0	-1.07	0.629315	0.899513	0	-1.35	0.039326	0.332507	0	-1.31	0.060786	0.412721	0	-1.54	0.003593	0.047945	1	-1.79	0.000121	0.003571	1	-1.46	0.010112	0.095283	0	-1.41	0.019397	0.125481	0	-1.56	0.002677	0.027177	1	-1.81	9.4e-05	0.002019	1	3
2	FBgn0039795	CG1342	CG1342	1.14	0.202547	0.999395	0	-1.31	0.010803	0.420142	0	-1.09	0.396343	0.795409	0	1.04	0.681261	0.945926	0	-1.23	0.051028	0.374521	0	-1.27	0.022963	0.185522	0	-1.5	0.000201	0.005388	1	-1.41	0.001293	0.020731	0	-1.49	0.000255	0.004877	0	-1.51	0.000177	0.003161	1	-1.51	0.00018	0.00336	1	2
3	FBgn0024944	Octopamine receptor in mushroom bodies	Oamb	1.17	0.324711	0.999395	0	1.22	0.197381	0.957756	0	1.03	0.861411	0.973326	0	-1.34	0.085752	0.493741	0	-1.31	0.117893	0.572692	0	-1.58	0.004602	0.058004	0	-1.63	0.002658	0.041404	1	-1.44	0.037929	0.224585	0	-1.41	0.031766	0.172048	0	-1.77	0.004045	0.037054	1	-2.22	0.000105	0.002195	1	3
2	FBgn0003244			-1.04	0.6852	0.999395	0	1.01	0.943836	0.99777	0	-1.07	0.465932	0.836904	0	-1.09	0.358558	0.819446	0	-1.1	0.311608	0.83434	0	-1.66	0	3e-05	1	-1.34	0.002066	0.034606	0	-1.32	0.002957	0.038796	0	-1.49	3.9e-05	0.000996	0	-1.57	5e-06	0.000143	1	-1.66	1e-06	2.4e-05	1	2
5	FBgn0034355	CG5226	CG5226	1.08	0.710174	0.999395	0	1.07	0.71389	0.988335	0	-1.09	0.680425	0.916694	0	1.34	0.283681	0.766964	0	1.75	0.004824	0.080164	0	3.05	3e-06	0.000123	1	1.77	0.003921	0.055127	0	1.75	0.020126	0.150316	0	1.69	0.007919	0.070817	0	1.86	0.001835	0.020596	1	1.84	0.002308	0.027153	1	5
3	FBgn0036609	CG13039	CG13039	1.19	0.069814	0.999395	0	-1.12	0.227318	0.958634	0	-1.13	0.206331	0.652735	0	-1.48	0.000137	0.006534	0	-1.55	2.2e-05	0.001084	1	-1.34	0.003122	0.043376	0	-1.5	8.2e-05	0.002559	0	-1.38	0.00122	0.019858	0	-1.42	0.00051	0.008691	0	-1.61	5e-06	0.000158	1	-1.65	2e-06	7.7e-05	1	3
3	FBgn0005633	flightin	fln	1.38	0.149422	0.999395	0	1.06	0.805135	0.993902	0	-1.15	0.513435	0.855943	0	-1.49	0.075829	0.466201	0	-2.02	0.002243	0.044682	1	-1.24	0.324163	0.751754	0	-1.31	0.269785	0.700023	0	-1.57	0.045052	0.250933	0	-1.63	0.03029	0.166802	0	-2.32	0.000317	0.005049	1	-2.18	0.000773	0.01108	1	3
2	FBgn0001402	terribly reduced optic lobes	trol	-1.07	0.501294	0.999395	0	-1.24	0.045026	0.749518	0	-1.46	0.000667	0.028544	0	-1.51	0.000229	0.009516	1	-1.35	0.00633	0.098118	0	-1.28	0.020599	0.171945	0	-1.34	0.00695	0.083356	0	-1.4	0.002404	0.033231	0	-1.48	0.000429	0.007469	0	-1.66	1.2e-05	0.000307	1	-1.54	0.000123	0.002479	1	2
2	FBgn0032373	CG12602	CG12602	1.09	0.439423	0.999395	0	-1.1	0.390982	0.97412	0	-1.35	0.0094	0.162579	0	-1.55	0.000228	0.00949	1	-1.36	0.00703	0.105169	0	-1.13	0.267939	0.701482	0	-1.28	0.029842	0.224798	0	-1.29	0.023845	0.166963	0	-1.36	0.007957	0.071012	0	-1.54	0.000264	0.004383	1	-1.55	0.00021	0.003807	1	2
2	FBgn0035551	CG7465	CG7465	1.02	0.893535	0.999395	0	-1.14	0.38647	0.97412	0	-1.77	0.000268	0.015149	1	-1.21	0.198298	0.678509	0	-1.39	0.029935	0.269517	0	-1.38	0.033917	0.238936	0	-1.33	0.058584	0.337756	0	-1.46	0.013512	0.116779	0	-1.34	0.050016	0.226007	0	-1.65	0.001255	0.015309	1	-1.56	0.003657	0.037724	1	2
2	FBgn0032430	CG6388	CG6388	1.07	0.341111	0.999395	0	-1.1	0.142722	0.946789	0	-1.16	0.033037	0.319699	0	-1.24	0.001705	0.044668	0	-1.34	4.9e-05	0.002037	0	-1.21	0.005575	0.066655	0	-1.34	4e-05	0.001374	0	-1.33	7.9e-05	0.00214	0	-1.5	0	5e-06	0	-1.54	0	1e-06	1	-1.55	0	1e-06	1	2
2	FBgn0014019	Rhodopsin 5	Rh5	1.08	0.525888	0.999395	0	-1.18	0.158109	0.949455	0	-1.13	0.303945	0.738101	0	-1.42	0.003824	0.08018	0	-1.44	0.002513	0.048799	0	-1.31	0.023838	0.190143	0	-1.27	0.047653	0.298082	0	-1.33	0.017611	0.138288	0	-1.32	0.019343	0.125304	0	-1.75	1.1e-05	0.000284	1	-1.6	0.000154	0.002954	1	2
2	FBgn0051116	CG31116	CG31116	-1.05	0.587181	0.999395	0	-1.12	0.203553	0.957756	0	-1.24	0.019116	0.236935	0	-1.33	0.002635	0.060764	0	-1.42	0.000241	0.007462	0	-1.29	0.00595	0.070108	0	-1.13	0.168363	0.574599	0	-1.29	0.010951	0.100021	0	-1.35	0.001365	0.019028	0	-1.75	0	3e-06	1	-1.72	0	7e-06	1	2
2	FBgn0035917	Z band alternatively spliced PDZ-motif protein 66	Zasp66	-1.11	0.214366	0.999395	0	-1.25	0.018526	0.55221	0	-1.28	0.005066	0.109114	0	-1.31	0.002606	0.06048	0	-1.36	0.000725	0.018352	0	-1.36	0.001702	0.027484	0	-1.27	0.01227	0.125026	0	-1.43	9.9e-05	0.002567	0	-1.34	0.001046	0.015273	0	-1.61	1e-06	2.7e-05	1	-1.83	0	0	1	2
3	FBgn0035484	CG11594	CG11594	1.11	0.447612	0.999395	0	-1.15	0.309666	0.968665	0	-1.27	0.088517	0.491369	0	-1.37	0.026068	0.261774	0	-1.52	0.003358	0.060875	0	-1.2	0.192255	0.615338	0	-1.04	0.766226	0.952421	0	-1.5	0.004838	0.055355	0	-1.48	0.006208	0.059606	0	-1.73	0.000185	0.003279	1	-1.71	0.000254	0.004442	1	3
3	FBgn0030563	CG18157	CG18157	1.49	0.00453	0.670117	0	-1.14	0.351676	0.971069	0	-1.11	0.432567	0.817398	0	-1.23	0.167636	0.644769	0	-1.36	0.027957	0.258251	0	-1.36	0.027762	0.209971	0	-1.45	0.008391	0.094597	0	-1.41	0.02483	0.171063	0	-1.47	0.006412	0.061032	0	-1.9	1.5e-05	0.000383	1	-1.73	0.000577	0.00867	1	3
3	FBgn0037292	CG2022	CG2022	1.23	0.278431	0.999395	0	-1.02	0.900049	0.997504	0	-1.09	0.660881	0.911182	0	-1.34	0.12046	0.571229	0	-1.37	0.094361	0.518458	0	-1.13	0.508728	0.854817	0	-1.19	0.346991	0.766415	0	-1.62	0.011749	0.105137	0	-1.5	0.033412	0.177169	0	-2.43	5.5e-05	0.001184	1	-1.86	0.001481	0.018924	1	3
3	FBgn0010349	Dynein heavy chain 64C	Dhc64C	-1.04	0.709027	0.999395	0	-1.02	0.86081	0.996946	0	-1.09	0.403974	0.800152	0	-1.16	0.145608	0.616034	0	-1.22	0.060021	0.410042	0	-1.36	0.004331	0.055289	0	-1.49	0.000252	0.006451	0	-1.5	0.000217	0.004858	0	-1.49	0.00027	0.005061	0	-1.57	4.8e-05	0.00106	1	-2.09	0	0	1	3
4	FBgn0053479			1.09	0.501733	0.999395	0	-1.2	0.160797	0.949455	0	1.2	0.156866	0.592534	0	-1.05	0.721027	0.955444	0	1.21	0.142772	0.624121	0	1.1	0.433458	0.82287	0	1.27	0.065496	0.359775	0	1.1	0.456025	0.770396	0	1.19	0.205898	0.489817	0	1.97	8e-06	0.000225	1	1.56	0.002012	0.024304	1	4
6	FBgn0039483	CG14259	CG14259	1.01	0.948706	0.999703	0	-1.02	0.860914	0.996946	0	1.01	0.943587	0.986316	0	-1.15	0.216433	0.701777	0	-1.21	0.103199	0.543488	0	-1.16	0.210935	0.639028	0	-1.11	0.375177	0.784896	0	-1.03	0.779753	0.928379	0	-1.45	0.002182	0.027268	0	-1.71	1.9e-05	0.000476	1	-1.51	0.000712	0.010298	1	6
6	FBgn0027586	CG5867	CG5867	1.26	0.103	0.999395	0	1.02	0.895858	0.997504	0	1.05	0.728456	0.932109	0	-1.03	0.857087	0.981041	0	-1.32	0.051612	0.375716	0	1.1	0.498287	0.849224	0	1.08	0.593971	0.899438	0	-1.12	0.41233	0.745847	0	-1.46	0.008671	0.073868	0	-1.78	0.000126	0.002374	1	-1.53	0.003562	0.036956	1	6
6	FBgn0030264			1.19	0.154957	0.999395	0	1.12	0.35549	0.971264	0	-1.06	0.623284	0.896878	0	-1.18	0.181365	0.663608	0	-1.28	0.046836	0.357524	0	-1.11	0.411262	0.815166	0	-1.07	0.555176	0.885578	0	-1.25	0.068008	0.319157	0	-1.4	0.007217	0.066296	0	-1.58	0.000375	0.005767	1	-1.54	0.000735	0.010586	1	6
6	FBgn0026593	CG5707	CG5707	1.28	0.043754	0.999395	0	-1.01	0.905318	0.997504	0	-1.14	0.296343	0.733236	0	-1.22	0.114255	0.559984	0	-1.24	0.086816	0.498773	0	-1.28	0.046622	0.289486	0	-1.37	0.011399	0.118831	0	-1.19	0.155506	0.483016	0	-1.42	0.005956	0.057946	0	-1.61	0.00024	0.00408	1	-1.56	0.000519	0.007945	1	6
6	FBgn0031406	CG17012	CG17012	-1.06	0.722256	0.999395	0	-1.02	0.895482	0.997504	0	-1.05	0.759861	0.944093	0	1.14	0.385027	0.833285	0	-1.22	0.191976	0.70584	0	1.26	0.135002	0.519345	0	1.19	0.249279	0.680252	0	-1.01	0.963613	0.988536	0	-1.33	0.064532	0.260687	0	-1.61	0.002702	0.027322	1	-1.57	0.004652	0.045129	1	6
6	FBgn0034784	CG9826	CG9826	1.28	0.045409	0.999395	0	-1.22	0.107873	0.92052	0	-1.11	0.380227	0.787387	0	-1.08	0.529508	0.904075	0	-1.26	0.061927	0.416809	0	1.03	0.813384	0.956293	0	-1.22	0.109651	0.471213	0	-1.47	0.002241	0.031437	0	-1.49	0.001628	0.021835	0	-1.74	2.6e-05	0.000641	1	-1.58	0.00035	0.005763	1	6
6	FBgn0030828	CG5162	CG5162	1.26	0.1258	0.999395	0	-1.01	0.950483	0.99777	0	-1.14	0.386919	0.790127	0	-1.01	0.923948	0.992425	0	-1.28	0.10063	0.537061	0	1.38	0.036579	0.249265	0	1.06	0.695466	0.933514	0	-1.08	0.619001	0.859157	0	-1.28	0.103988	0.340257	0	-1.66	0.001337	0.016139	1	-1.61	0.005275	0.049595	1	6
6	FBgn0031176	CG1678	CG1678	-1.11	0.500955	0.999395	0	1.26	0.139206	0.941399	0	1.16	0.322249	0.75395	0	-1.08	0.612251	0.928909	0	1.03	0.859766	0.986027	0	1.03	0.84467	0.96597	0	-1.39	0.033646	0.243413	0	-1.3	0.086977	0.362494	0	-1.55	0.005682	0.055881	0	-2.26	2e-06	5.3e-05	1	-1.84	0.000179	0.003351	1	6
6	FBgn0025709	CG8083	CG8083	1.85	0.001129	0.473724	0	1.07	0.724359	0.988625	0	-1.06	0.766034	0.944888	0	-1.18	0.413624	0.846503	0	-1.31	0.134587	0.608362	0	1.11	0.547478	0.870561	0	-1.18	0.360997	0.773985	0	-1.67	0.005702	0.062936	0	-1.58	0.012967	0.095918	0	-1.79	0.002014	0.022115	1	-1.96	0.000403	0.006379	1	6
7	FBgn0052393	dikar	dikar	-1.14	0.443747	0.999395	0	1.05	0.805694	0.994316	0	1.19	0.316349	0.747844	0	-1.04	0.820077	0.973086	0	1.02	0.928961	0.991117	0	1.44	0.04024	0.262157	0	1.28	0.157211	0.556119	0	1.24	0.227681	0.578059	0	1.74	0.005214	0.052832	0	1.71	0.003035	0.029997	1	2	0.000203	0.00371	1	7
7	FBgn0033422	Odorant receptor 45b	Or45b	1.11	0.577156	0.999395	0	1.24	0.226482	0.958634	0	1.31	0.173041	0.61031	0	1.62	0.008678	0.135316	0	1.74	0.002969	0.05576	0	1.63	0.00797	0.086419	0	1.37	0.082913	0.410629	0	1.64	0.007748	0.07877	0	1.65	0.007105	0.065495	0	2.25	2.9e-05	0.000689	1	1.85	0.001108	0.014948	1	7
7	FBgn0036369	CG10089	CG10089	1.14	0.360899	0.999395	0	1.21	0.181333	0.950325	0	1.51	0.004689	0.104475	0	1.38	0.025513	0.258795	0	1.34	0.039649	0.321919	0	1.12	0.41275	0.81539	0	1.13	0.385204	0.791268	0	1.28	0.086181	0.360207	0	1.3	0.065024	0.261867	0	2.03	5e-06	0.000138	1	1.63	0.002174	0.02593	1	7
7	FBgn0040883			1.18	0.283802	0.999395	0	1.09	0.574048	0.985816	0	1.11	0.496555	0.848581	0	1.3	0.088156	0.498629	0	1.11	0.504846	0.914329	0	1.17	0.316779	0.745714	0	1.53	0.006822	0.082119	0	1.43	0.021753	0.157803	0	1.3	0.085698	0.305697	0	1.69	0.002484	0.025789	1	1.61	0.002503	0.028731	1	7
7	FBgn0033425			-1.03	0.712176	0.999395	0	-1.01	0.929657	0.997504	0	1.16	0.109237	0.525592	0	1.19	0.038878	0.330567	0	1.18	0.048144	0.362253	0	1.19	0.036794	0.249565	0	1.3	0.002174	0.035815	0	1.37	0.000284	0.006057	0	1.45	2.4e-05	0.000675	0	1.56	1e-06	3.7e-05	1	1.59	1e-06	2.3e-05	1	7
7	FBgn0039579			-1.01	0.930611	0.999703	0	1.07	0.489242	0.979862	0	1.09	0.386645	0.789914	0	-1.02	0.875824	0.983753	0	1.35	0.002691	0.051331	0	1.42	0.000538	0.011149	0	1.13	0.262344	0.692759	0	1.32	0.005148	0.057805	0	1.34	0.00381	0.041615	0	1.54	3.5e-05	0.000816	1	1.57	1.5e-05	0.000426	1	7
5	FBgn0035887	Jonah 66Cii	Jon66Cii	1.61	0.020635	0.957371	0	2.42	1e-05	0.004851	1	2.5	5e-06	0.000779	1	2.47	6e-06	0.00056	1	2.03	0.000746	0.01868	1	1.89	0.000884	0.016381	1	2.17	7.7e-05	0.002434	1	3.01	0	8e-06	1	1.9	0.000841	0.012829	1	1.3	0.15951	0.40478	0	1.77	0.002798	0.031334	1	5
5	FBgn0035743	CG15829	CG15829	-1.09	0.63679	0.999395	0	1.71	0.006786	0.34711	0	1.99	0.00065	0.028189	1	2.63	2.2e-05	0.001542	1	3.04	0	2.7e-05	1	2.83	1e-06	6.4e-05	1	2.73	2e-06	0.00012	1	2.87	1e-06	4.5e-05	1	2.3	5.7e-05	0.001341	1	1.56	0.023438	0.124635	0	2.54	9e-06	0.000278	1	5
5	FBgn0034296	CG10912	CG10912	1.01	0.963304	0.999703	0	1.77	0.002365	0.204189	0	2.28	2.5e-05	0.002395	1	2.15	7.4e-05	0.003912	1	2.22	4.1e-05	0.001775	1	3.2	0	2e-06	1	3.08	0	5e-06	1	2.94	1e-06	4.9e-05	1	2.29	2.4e-05	0.000662	1	1.65	0.006959	0.054708	0	2.54	3e-06	0.000103	1	5
5	FBgn0034758	CG13510	CG13510	-1.02	0.895987	0.999395	0	1.63	0.006607	0.339238	0	2.11	6.8e-05	0.005386	1	2.43	4e-06	0.000367	1	2.42	4e-06	0.000256	1	3.08	0	2e-06	1	2.41	5e-06	0.000211	1	2.33	9e-06	0.000325	1	1.98	0.000237	0.004576	1	1.43	0.043136	0.184437	0	2.42	4e-06	0.000139	1	5
5	FBgn0034293	CG14495	CG14495	1.02	0.837265	0.999395	0	1.28	0.039925	0.718525	0	1.61	0.000164	0.010257	1	1.56	0.000385	0.014435	1	1.91	1e-06	7.5e-05	1	2.38	0	0	1	2.49	0	0	1	2.6	0	0	1	2.04	0	7e-06	1	1.47	0.004034	0.036982	0	2.32	0	0	1	5
5	FBgn0035806	PGRP-SD	PGRP-SD	1.11	0.53015	0.999395	0	1.38	0.0637	0.834006	0	1.95	0.000238	0.01393	1	2.1	5.4e-05	0.00311	1	2.03	0.00011	0.003919	1	3.62	0	0	1	2.79	0	1.1e-05	1	2.34	6e-06	0.000226	1	1.91	0.000362	0.006504	1	1.57	0.010559	0.073135	0	2.28	1e-05	0.000314	1	5
5	FBgn0030040	CG15347	CG15347	1.23	0.305986	0.999395	0	1.64	0.017427	0.532776	0	2.18	0.000299	0.016512	1	2.13	0.000429	0.015586	1	2.24	0.000188	0.006116	1	2.79	4e-06	0.000202	1	2.71	8e-06	0.000331	1	2.47	3.7e-05	0.00112	1	2.02	0.000977	0.014485	1	1.3	0.198023	0.456028	0	2.03	0.00091	0.012678	1	5
5	FBgn0038353	CG5399	CG5399	1.03	0.775953	0.999395	0	1.27	0.047974	0.764095	0	1.76	1.7e-05	0.001774	1	2.16	0	6e-06	1	2.15	0	5e-06	1	2.68	0	0	1	2.33	0	0	1	2.11	0	4e-06	1	1.84	4e-06	0.000151	1	1.44	0.00383	0.035531	0	1.97	0	2.2e-05	1	5
5	FBgn0038900			-1.02	0.914544	0.999395	0	1.28	0.135077	0.940266	0	1.85	0.000466	0.022945	1	1.88	0.00034	0.013161	1	1.81	0.000715	0.018212	1	2.38	3e-06	0.000126	1	2.04	0.000242	0.00625	1	1.98	0.000121	0.003024	1	1.9	0.000263	0.004961	1	1.48	0.033359	0.155701	0	1.94	0.000523	0.007987	1	5
5	FBgn0032139	CG13116	CG13116	1.22	0.128572	0.999395	0	1.27	0.067565	0.847459	0	1.74	7.6e-05	0.0059	1	1.62	0.000459	0.016307	1	1.98	2e-06	0.000141	1	1.96	3e-06	0.000131	1	2	2e-06	8.1e-05	1	1.86	1.2e-05	0.000429	1	1.66	0.000245	0.004716	1	1.4	0.012477	0.082379	0	1.79	3.2e-05	0.000799	1	5
8	FBgn0000279	Cecropin C	CecC	-1	0.997456	0.999838	0	4.37	0.01027	0.410348	0	8.41	2.3e-05	0.002249	1	11.86	9e-06	0.000752	1	9.42	4.3e-05	0.00182	1	11.28	1.6e-05	0.000571	1	5.36	0.001448	0.026372	1	8.13	3e-05	0.000937	1	5.47	0.000479	0.008243	1	2.95	0.056642	0.217783	0	8.63	1.9e-05	0.000528	1	8
8	FBgn0039685	Odorant-binding protein 99b	Obp99b	-1.62	0.125198	0.999395	0	2.52	0.004064	0.265327	0	4.08	2.9e-05	0.002698	1	4.1	2.7e-05	0.001788	1	3.06	0.000623	0.016214	1	3.72	8.1e-05	0.002342	1	4.68	6e-06	0.000262	1	3.29	0.000298	0.006264	1	2.98	0.000813	0.012531	1	2.21	0.012947	0.084795	0	3.53	0.000141	0.002757	1	8
3	FBgn0001089	beta galactosidase	Gal	1.31	0.014428	0.900633	0	1.03	0.768679	0.990614	0	-1.37	0.005072	0.109114	0	-1.57	0.000298	0.011795	1	-1.72	5e-06	0.000279	1	-1.5	0.000331	0.007462	1	-1.51	0.000286	0.007178	1	-1.51	0.000277	0.00594	1	-1.5	0.001013	0.014879	1	-1.27	0.027985	0.139239	0	-1.73	4e-06	0.000132	1	3
5	FBgn0033301	CG12780	CG12780	-1.28	0.269116	0.999395	0	1.95	0.003637	0.251647	0	1.78	0.01112	0.17782	0	2.39	0.000202	0.008685	1	2.62	5e-05	0.002062	1	3	6e-06	0.000245	1	2.96	7e-06	0.000307	1	2.08	0.001481	0.023017	1	1.99	0.002716	0.032343	1	1.52	0.06139	0.22945	0	2.44	0.000153	0.00295	1	5
5	FBgn0051704	CG31704	CG31704	1.11	0.596581	0.999395	0	1.81	0.003502	0.250173	0	1.9	0.00165	0.053973	0	2.06	0.000445	0.015948	1	1.9	0.001615	0.034657	1	2.78	2e-06	0.00011	1	2.1	0.000346	0.008442	1	2.64	6e-06	0.000225	1	1.84	0.002611	0.031428	1	1.61	0.016801	0.100663	0	2.37	4.3e-05	0.001028	1	5
5	FBgn0033787	CG13321	CG13321	1.16	0.318481	0.999395	0	1.37	0.037809	0.701425	0	1.59	0.002602	0.073246	0	1.9	5.7e-05	0.003194	1	1.69	0.000719	0.018291	1	3.16	0	0	1	2.54	0	4e-06	1	2.43	0	9e-06	1	1.61	0.002161	0.027128	1	1.23	0.169681	0.417846	0	2.23	1e-06	4.7e-05	1	5
5	FBgn0005664	Crystallin	Cry	1.25	0.174855	0.999395	0	1.79	0.000611	0.093359	0	1.52	0.010764	0.174033	0	2.05	3.6e-05	0.002258	1	2.14	1.3e-05	0.000693	1	2.89	0	1e-06	1	2.89	0	1e-06	1	2.24	5e-06	0.000205	1	2.58	0	1e-05	1	1.56	0.007224	0.056089	0	2.17	1e-05	0.000311	1	5
5	FBgn0040958	Peritrophin-15b	Peritrophin-15b	-1.24	0.227171	0.999395	0	1.46	0.03721	0.695651	0	1.54	0.017662	0.226934	0	2.48	3e-06	0.000329	1	2.46	4e-06	0.000236	1	2.59	1e-06	7.1e-05	1	1.82	0.001253	0.023788	1	1.71	0.003533	0.044098	1	1.87	0.00073	0.011622	1	1.09	0.619616	0.816926	0	2.01	0.000209	0.003793	1	5
5	FBgn0000278	Cecropin B	CecB	1.12	0.661544	0.999395	0	1.05	0.846303	0.996946	0	2.46	0.000228	0.013574	1	1.52	0.046347	0.359527	0	2.56	3.5e-05	0.001536	1	3.56	0	1e-05	1	2.22	0.000326	0.008014	1	3.58	1e-06	5.1e-05	1	2.18	0.00323	0.036762	1	1.78	0.014301	0.090246	0	3.14	1e-06	4.4e-05	1	5
3	FBgn0004242	Synaptotagmin 1	Syt1	1.03	0.76671	0.999395	0	-1.47	0.000169	0.039242	0	-1.45	0.000269	0.015149	0	-1.43	0.00045	0.016062	0	-1.53	4e-05	0.00175	1	-1.58	1.3e-05	0.000508	1	-1.66	2e-06	9.2e-05	1	-1.58	1.1e-05	0.000401	1	-1.52	5.1e-05	0.001239	1	-1.4	0.000863	0.011328	0	-1.61	6e-06	0.000203	1	3
3	FBgn0029961	Ionotropic receptor 7a	Ir7a	1.24	0.020506	0.957371	0	-1.06	0.505625	0.981307	0	-1.07	0.441713	0.823358	0	-1.47	6.2e-05	0.003413	0	-1.51	2.1e-05	0.001023	1	-1.57	4e-06	0.000182	1	-1.71	0	1.1e-05	1	-1.6	2e-06	0.000102	1	-1.58	3e-06	0.000113	1	-1.44	0.000113	0.002175	0	-1.71	0	7e-06	1	3
5	FBgn0034329	Immune induced molecule 1	IM1	-1.14	0.60705	0.999395	0	1.02	0.925522	0.997504	0	1.55	0.078138	0.46681	0	1.81	0.018972	0.217804	0	2.9	5.9e-05	0.002355	1	3.75	1e-06	7.4e-05	1	3.87	1e-06	5.1e-05	1	4.47	0	6e-06	1	2.68	0.000175	0.003529	1	1.98	0.007234	0.056137	0	3.7	2e-06	6.3e-05	1	5
5	FBgn0040734	CG15065	CG15065	-1.18	0.477783	0.999395	0	1.4	0.142393	0.946789	0	1.95	0.00484	0.10672	0	1.79	0.013235	0.174327	0	2.08	0.002264	0.045026	1	2.95	1.5e-05	0.000555	1	3.25	3e-06	0.000154	1	3.59	1e-06	3.5e-05	1	2.37	0.000372	0.006645	1	1.45	0.112294	0.32766	0	2.52	0.000158	0.003011	1	5
5	FBgn0034512	CG18067	CG18067	-1.08	0.644327	0.999395	0	-1.03	0.865728	0.997089	0	-1.07	0.688314	0.919125	0	1.26	0.162573	0.637725	0	1.66	0.002552	0.049414	1	2.67	0	8e-06	1	2.46	1e-06	4.4e-05	1	2.77	0	3e-06	1	1.93	0.000143	0.002943	1	1.47	0.019848	0.111881	0	2.3	3e-06	0.000105	1	5
5	FBgn0036125	CG6279	CG6279	-1.12	0.543016	0.999395	0	-1.29	0.18141	0.950325	0	1.21	0.306697	0.739755	0	1.77	0.007326	0.12114	0	2.09	0.000228	0.007192	1	2.45	1.2e-05	0.000475	1	2.05	0.000318	0.007844	1	2.26	5.6e-05	0.001593	1	2.19	9.9e-05	0.002151	1	1.59	0.016723	0.100419	0	2.03	0.000378	0.006083	1	5
5	FBgn0044810	Turandot X	TotX	-1.42	0.171769	0.999395	0	1.22	0.435874	0.974172	0	2.37	0.001182	0.043095	1	2.24	0.002313	0.056511	0	2.07	0.005636	0.089412	0	3.38	1.1e-05	0.000431	1	2.52	0.000545	0.012138	1	3.2	2.4e-05	0.000761	1	2.29	0.001759	0.023106	1	1.67	0.068598	0.244365	0	2.23	0.002437	0.028227	1	5
5	FBgn0040837	CG8620	CG8620	-1.12	0.625921	0.999395	0	1.34	0.223857	0.957756	0	1.64	0.043661	0.361186	0	1.91	0.008628	0.134704	0	1.41	0.19248	0.70635	0	2.53	0.000265	0.0062	1	2.29	0.000966	0.019472	1	2.76	8e-05	0.002164	1	2.22	0.001504	0.020448	1	1.8	0.016487	0.099412	0	3.05	1.9e-05	0.000514	1	5
5	FBgn0034328	Immune induced molecule 23	IM23	-1.23	0.394622	0.999395	0	-1.09	0.717576	0.988335	0	-1.02	0.930572	0.986316	0	1.29	0.285601	0.767892	0	2	0.004837	0.080164	0	3.02	1.9e-05	0.000667	1	3.36	4e-06	0.000179	1	3.44	3e-06	0.000116	1	2.19	0.001651	0.022059	1	1.61	0.049188	0.199501	0	2.89	3.7e-05	0.0009	1	5
5	FBgn0010385	Defensin	Def	-1.16	0.1843	0.999395	0	1.1	0.395835	0.97412	0	1.22	0.067291	0.440505	0	1.35	0.007708	0.125235	0	1.45	0.001163	0.026438	0	1.96	0	5e-06	1	2.03	0	2e-06	1	1.79	8e-06	0.000302	1	1.62	3.7e-05	0.000961	1	1.3	0.019983	0.112495	0	2.32	0	0	1	5
5	FBgn0036627	CG4680	CG4680	-1.07	0.746607	0.999395	0	1.21	0.3438	0.969629	0	1.45	0.073125	0.456471	0	1.74	0.00823	0.130201	0	1.38	0.114884	0.56736	0	2.26	0.000164	0.004181	1	2.15	0.000389	0.009275	1	1.99	0.002996	0.039107	1	1.95	0.001704	0.022623	1	1.54	0.038308	0.170812	0	2.12	0.000475	0.007356	1	5
5	FBgn0046689	Tak1-like 1	Takl1	1.2	0.240258	0.999395	0	1.51	0.003893	0.260617	0	1.54	0.002695	0.074637	0	1.55	0.002329	0.056582	0	1.41	0.015108	0.177375	0	2.01	4e-06	0.0002	1	1.86	3.4e-05	0.001213	1	2.38	0	4e-06	1	1.7	0.000292	0.005418	1	1.26	0.09427	0.296249	0	2.02	4e-06	0.000127	1	5
5	FBgn0032087	CG9568	CG9568	-1.26	0.265895	0.999395	0	1.36	0.136584	0.940266	0	1.78	0.00706	0.133909	0	1.69	0.013729	0.177978	0	1.61	0.024543	0.2367	0	2.44	6.1e-05	0.001833	1	2.68	1.2e-05	0.0005	1	2.44	6e-05	0.001695	1	1.86	0.003898	0.04225	1	1.17	0.457452	0.707436	0	1.84	0.004517	0.044279	1	5
5	FBgn0051148	CG31148	CG31148	1.26	0.191338	0.999395	0	1.26	0.152306	0.947216	0	1.26	0.192959	0.637459	0	1.1	0.575446	0.918795	0	1.32	0.088267	0.501917	0	2.39	2e-06	8e-05	1	2.74	1e-06	4e-05	1	1.97	0.000305	0.006359	1	2.17	1.3e-05	0.000399	1	1.32	0.088999	0.285943	0	1.83	0.000437	0.00687	1	5
5	FBgn0051004	CG31004	CG31004	1.14	0.370047	0.999395	0	1.41	0.023522	0.591526	0	1.44	0.015323	0.210912	0	1.29	0.086496	0.494907	0	1.53	0.010547	0.138089	0	2.11	4e-06	0.000199	1	2.09	5e-06	0.000232	1	1.97	2.2e-05	0.000727	1	2.26	1e-06	3.3e-05	1	1.5	0.007749	0.059151	0	1.83	0.000393	0.006252	1	5
5	FBgn0033659	Death associated molecule related to Mch2	Damm	-1.08	0.683339	0.999395	0	1.28	0.223008	0.957756	0	1.37	0.117057	0.540423	0	1.73	0.007439	0.122234	0	1.48	0.052982	0.381407	0	2.4	4.6e-05	0.00144	1	2.26	0.000127	0.003712	1	2.13	0.000331	0.00682	1	1.8	0.004578	0.047726	1	1.11	0.593094	0.801787	0	1.81	0.004041	0.040488	1	5
5	FBgn0030334	Karl	Karl	1.06	0.708933	0.999395	0	1.76	0.000455	0.075712	0	1.15	0.346876	0.768642	0	1.59	0.003427	0.073737	0	1.46	0.015283	0.178571	0	1.65	0.001662	0.027046	1	2.32	1e-06	5e-05	1	2.1	3.7e-05	0.001116	1	1.77	0.000389	0.006889	1	1.34	0.056584	0.217738	0	1.67	0.001305	0.017169	1	5
7	FBgn0032810	CG13077	CG13077	-1	0.968019	0.999703	0	1.09	0.429149	0.974172	0	1.22	0.066211	0.439538	0	1.14	0.258982	0.745808	0	1.38	0.004457	0.075021	0	1.74	3e-06	0.000158	1	1.64	2.2e-05	0.000844	1	1.8	1e-06	5.4e-05	1	1.61	4.3e-05	0.001071	1	1.43	0.001631	0.018745	0	1.75	3e-06	9.7e-05	1	7
7	FBgn0035049	Matrix metalloproteinase 1	Mmp1	1.18	0.09716	0.999395	0	1.17	0.113052	0.921613	0	1.41	0.000704	0.029451	0	1.4	0.000873	0.026861	0	1.45	0.000943	0.022629	0	1.79	0	1e-05	1	2.02	0	0	1	1.89	0	2e-06	1	1.75	0	1.7e-05	1	1.4	0.000951	0.012252	0	1.66	2e-06	8.7e-05	1	7
7	FBgn0003390	shifted	shf	1.45	0.002642	0.624502	0	1.12	0.355094	0.971264	0	1.41	0.005062	0.109114	0	1.26	0.057626	0.405079	0	1.13	0.294884	0.823507	0	1.64	0.000102	0.002832	1	1.74	2.1e-05	0.000801	1	1.87	2e-06	0.000103	1	1.53	0.00075	0.011792	1	1.2	0.164353	0.411039	0	1.66	7.7e-05	0.001707	1	7
7	FBgn0003328	scab	scb	1.15	0.237732	0.999395	0	1.1	0.422785	0.97412	0	1.07	0.547434	0.870451	0	1.29	0.029929	0.282459	0	1.19	0.131075	0.602232	0	1.97	0	1.2e-05	1	1.97	0	1.4e-05	1	1.6	0.000391	0.007927	1	1.69	2.3e-05	0.000639	1	1.38	0.006435	0.051992	0	1.65	5.3e-05	0.001245	1	7
1	FBgn0039760	CG9682	CG9682	1.05	0.841054	0.999395	0	-1.33	0.244637	0.963641	0	-1.45	0.129714	0.562874	0	-2.59	0.000248	0.010114	1	-2.52	0.001122	0.025794	1	-1.98	0.013926	0.130754	0	-2.13	0.002974	0.044928	1	-2.94	4.5e-05	0.001316	1	-2.6	0.000711	0.011359	1	-2.13	0.006172	0.050519	0	-2.21	0.001853	0.022676	1	1
2	FBgn0035735	Cuticular protein 65Ea	Cpr65Ea	-1.2	0.159375	0.999395	0	1.08	0.54256	0.984159	0	-1.05	0.718321	0.929172	0	1	0.997827	0.999335	0	-1.3	0.038255	0.314684	0	-1.35	0.019743	0.166895	0	-1.58	0.000565	0.012456	1	-1.51	0.001841	0.027379	1	-1.51	0.001752	0.023071	1	-1.43	0.006362	0.051654	0	-1.62	0.000312	0.005232	1	2
7	FBgn0015831	Rtnl2	Rtnl2	1.02	0.868506	0.999395	0	1.12	0.266692	0.964139	0	1.43	0.001128	0.041429	0	1.26	0.032267	0.296526	0	1.33	0.009152	0.125713	0	1.39	0.002543	0.037218	0	1.56	7.7e-05	0.002433	1	1.84	0	1.6e-05	1	1.6	3.5e-05	0.000907	1	1.21	0.076746	0.262233	0	1.66	1e-05	0.000293	1	7
5	FBgn0038095	Cyp304a1	Cyp304a1	-1.26	0.36428	0.999395	0	2.18	0.001355	0.150944	0	3.13	1e-06	0.000268	1	4.17	0	1.6e-05	1	1.96	0.002278	0.045204	1	3.61	0	9e-06	1	1.75	0.010392	0.111064	0	2.2	0.000421	0.008439	1	3.05	2e-06	8.2e-05	1	1.59	0.030876	0.148236	0	2.33	0.000181	0.003366	1	5
5	FBgn0051955	CG31955	CG31955	-1.42	0.059851	0.999395	0	1.39	0.078401	0.877013	0	2.25	4.5e-05	0.003832	1	2	0.00037	0.013933	1	1.82	0.001847	0.038477	1	2.16	9.9e-05	0.00278	1	1.72	0.004589	0.061492	0	2.09	0.000176	0.00408	1	1.78	0.002584	0.031276	1	1.41	0.066927	0.241027	0	2.02	0.000308	0.00518	1	5
7	FBgn0037389	CG10991	CG10991	1.11	0.422822	0.999395	0	1.51	0.002294	0.203832	0	1.55	0.00128	0.045115	1	1.5	0.002709	0.061717	0	1.53	0.001714	0.036289	1	2.07	1e-06	3.8e-05	1	1.41	0.010375	0.111022	0	1.5	0.002681	0.035997	1	1.83	8e-05	0.001798	1	1.45	0.006158	0.050507	0	1.92	6e-06	0.000182	1	7
3	FBgn0001263	inactivation no afterpotential D	inaD	1.01	0.873379	0.999395	0	-1.27	0.01127	0.428164	0	-1.57	6e-06	0.000825	1	-1.61	2e-06	0.000279	1	-1.57	6e-06	0.000369	1	-1.32	0.003291	0.045022	0	-1.43	0.007313	0.086654	0	-1.78	0	3e-06	1	-1.72	0	8e-06	1	-1.39	0.000525	0.007574	0	-1.7	0	1.2e-05	1	3
2	FBgn0031930	CG7025	CG7025	1.14	0.34127	0.999395	0	-1.2	0.181413	0.950325	0	-1.74	0.000144	0.009369	1	-1.22	0.149196	0.622355	0	-1.78	7.6e-05	0.002922	1	-1.28	0.072215	0.374431	0	-1.41	0.013801	0.135583	0	-1.54	0.00246	0.033793	1	-1.56	0.001756	0.023103	1	-1.48	0.005122	0.043972	0	-1.54	0.002471	0.028445	1	2
3	FBgn0037429	Osiris 19	Osi19	1.27	0.470571	0.999395	0	1.42	0.179418	0.950325	0	1.1	0.676812	0.915115	0	1.58	0.178492	0.660254	0	-1.02	0.948352	0.992337	0	-1.6	0.116064	0.48132	0	-1.68	0.08255	0.409482	0	-3.02	0.001982	0.028819	1	-3.11	2.4e-05	0.000672	1	-1.54	0.104822	0.315419	0	-3.27	0.001085	0.014724	1	3
6	FBgn0005511	midline	mid	1.15	0.280131	0.999395	0	-1.09	0.483239	0.979862	0	1.26	0.074886	0.459032	0	-1.25	0.113751	0.559209	0	-1.33	0.03214	0.281843	0	-1.2	0.169219	0.578354	0	-1.55	0.00126	0.023825	1	-1.4	0.011025	0.100497	0	-1.6	0.001467	0.020134	1	-1.35	0.02256	0.121538	0	-1.7	0.00013	0.002597	1	6
1	FBgn0033658	TwdlBeta	TwdlBeta	-1.61	0.065128	0.999395	0	-1.11	0.649256	0.988335	0	-1.05	0.878623	0.978263	0	-1.94	0.022054	0.237483	0	-1.81	0.022636	0.223894	0	-2.24	0.002519	0.036908	1	-1.62	0.096351	0.4424	0	-2.06	0.073307	0.332558	0	-2.45	0.002684	0.032132	1	-1.71	0.105142	0.315833	0	-2.97	0.00039	0.006236	1	1
7	FBgn0050273	CG30273	CG30273	1.11	0.433143	0.999395	0	1.15	0.275093	0.968164	0	1.45	0.005244	0.111257	0	1.27	0.063539	0.422256	0	1.31	0.039366	0.3204	0	1.84	1.4e-05	0.000511	1	1.44	0.006006	0.075049	0	1.48	0.003546	0.044221	0	1.51	0.002279	0.028214	1	1.26	0.080332	0.269998	0	1.53	0.001642	0.020594	1	7
3	FBgn0030615	Cyp4s3	Cyp4s3	1.07	0.656773	0.999395	0	1.06	0.684558	0.988335	0	-1.13	0.387398	0.790385	0	-1.63	0.001115	0.032276	1	-1.36	0.034215	0.29455	0	-1.28	0.087718	0.415947	0	-1.26	0.109272	0.470656	0	-1.28	0.085569	0.358903	0	-1.55	0.003324	0.037672	1	-1.49	0.007474	0.057557	0	-1.84	0.000259	0.004502	1	3
2	FBgn0033807	aquaporin	AQP	1.01	0.958332	0.999703	0	-1.18	0.143044	0.946789	0	-1.41	0.002701	0.074637	0	-1.24	0.054094	0.389415	0	-1.35	0.00888	0.123254	0	-1.39	0.003953	0.051771	0	-1.35	0.007973	0.091478	0	-1.43	0.001865	0.027669	0	-1.62	4.8e-05	0.001187	1	-1.4	0.003292	0.031727	0	-1.59	8.6e-05	0.001863	1	2
2	FBgn0038087	beat-Va	beat-Va	1.29	0.069389	0.999395	0	-1.48	0.005813	0.322434	0	-1.07	0.619882	0.895633	0	1.05	0.745094	0.960717	0	-1.23	0.136982	0.613291	0	-1.4	0.017092	0.151197	0	-1.52	0.003591	0.051701	0	-1.5	0.004556	0.052947	0	-1.56	0.001894	0.02451	1	-1.47	0.006956	0.054708	0	-1.64	0.000672	0.009842	1	2
3	FBgn0033367	pro-phenoloxidase A3	proPo-A3	1.19	0.297404	0.999395	0	-1.17	0.338002	0.969629	0	-1.1	0.55579	0.873385	0	-1.26	0.167787	0.644769	0	-1.59	0.005988	0.093477	0	-1.51	0.015129	0.138872	0	-1.36	0.064817	0.358745	0	-1.56	0.01769	0.138679	0	-1.91	0.000648	0.010649	1	-1.57	0.01612	0.09807	0	-1.7	0.00444	0.04365	1	3
6	FBgn0036938	CG14187	CG14187	-1.18	0.048238	0.999395	0	1.06	0.454076	0.977361	0	-1.04	0.598045	0.890219	0	-1.24	0.010794	0.152571	0	-1.24	0.00961	0.130235	0	-1.29	0.002953	0.04161	0	-1.28	0.003616	0.051781	0	-1.32	0.001346	0.021334	0	-1.5	6e-06	0.000202	1	-1.47	1.6e-05	0.000421	0	-1.5	6e-06	0.000188	1	6
7	FBgn0042627	v(2)k05816	v(2)k05816	-1.05	0.80327	0.999395	0	1.24	0.243255	0.961391	0	1.73	0.004221	0.097549	0	1.71	0.005284	0.09866	0	1.37	0.095563	0.5234	0	1.56	0.019111	0.163194	0	1.54	0.02295	0.187509	0	1.39	0.078384	0.34427	0	1.78	0.00275	0.032594	1	1.22	0.279866	0.550641	0	2.62	3e-06	8.9e-05	1	7
7	FBgn0035977	Peptidoglycan recognition protein LF	PGRP-LF	1.06	0.517539	0.999395	0	1.27	0.008854	0.386277	0	1.14	0.142471	0.577842	0	1.1	0.269734	0.756872	0	1.21	0.040121	0.32395	0	1.37	0.000888	0.016386	0	1.38	0.000666	0.014265	0	1.29	0.005134	0.057779	0	1.69	0	1e-05	1	1.17	0.076791	0.262254	0	1.5	2.5e-05	0.000637	1	7
5	FBgn0030262	Vago	Vago	1	0.977946	0.999703	0	1.65	0.000933	0.116818	0	2.81	0	1e-06	1	2.58	0	4e-06	1	1.93	2.6e-05	0.001208	1	2.52	0	3e-06	1	1.88	5.1e-05	0.001704	1	1.6	0.001881	0.027746	1	1.25	0.128496	0.380771	0	1.31	0.069019	0.245216	0	1.65	0.001016	0.013965	1	5
1	FBgn0030133	CG15316	CG15316	-2.37	7.1e-05	0.132938	0	-2.31	0.000109	0.030326	1	-1.87	0.003013	0.079364	0	-2.58	1.7e-05	0.001273	1	-2.72	6e-06	0.000367	1	-2.26	0.000482	0.010104	1	-2.58	1.6e-05	0.000639	1	-1.98	0.001265	0.020423	1	-1.54	0.035726	0.184486	0	-1.58	0.026047	0.132967	0	-2.01	0.002372	0.027617	1	1
3	FBgn0039897	CG1674	CG1674	-1	0.998846	0.999838	0	-1.5	0.001723	0.172855	0	-1.43	0.010441	0.171138	0	-1.74	3.3e-05	0.002109	1	-1.52	0.001094	0.02532	1	-1.72	4.5e-05	0.00142	1	-1.68	8e-05	0.002513	1	-1.89	1.5e-05	0.00051	1	-1.33	0.036389	0.186411	0	-1.35	0.016146	0.09807	0	-1.65	0.000146	0.002843	1	3
3	FBgn0004551	Calcium ATPase at 60A	Ca-P60A	-1.05	0.59636	0.999395	0	-1.45	0.000172	0.039242	0	-1.47	0.000113	0.007926	0	-1.59	6e-06	0.000486	1	-1.6	2.3e-05	0.001101	1	-1.63	2e-06	0.000109	1	-1.65	1e-06	7.5e-05	1	-1.66	1e-06	5.5e-05	1	-1.44	0.000207	0.004066	0	-1.46	0.000153	0.002809	0	-1.67	1e-06	3.7e-05	1	3
5	FBgn0050154	CG30154	CG30154	-1.12	0.623388	0.999395	0	1.6	0.032957	0.663488	0	2.13	0.000847	0.033553	1	1.5	0.064127	0.424443	0	2.24	0.000411	0.011359	1	3.19	1e-06	7.4e-05	1	3.59	1e-06	6.6e-05	1	2.97	5e-06	0.000181	1	1.66	0.021308	0.132558	0	1.92	0.007566	0.058027	0	3.19	1e-06	5.3e-05	1	5
5	FBgn0031701	Turandot M	TotM	-1.54	0.1202	0.999395	0	1.56	0.107806	0.92052	0	3.34	4.8e-05	0.004012	1	2.06	0.010588	0.150789	0	2.38	0.002451	0.048092	1	2.79	0.00041	0.008861	1	3.32	5.1e-05	0.001701	1	2.5	0.001462	0.022795	1	1.81	0.033643	0.178033	0	1.48	0.155791	0.399721	0	2.51	0.003212	0.034493	1	5
2	FBgn0050413	CG30413	CG30413	-1.13	0.339026	0.999395	0	-1.09	0.486081	0.979862	0	-1.22	0.121809	0.549101	0	-1.06	0.693069	0.948703	0	-1.51	0.002215	0.044314	1	-1.51	0.002411	0.035775	1	-1.67	0.000195	0.005309	1	-1.76	0.000212	0.004779	1	-1.29	0.053072	0.233945	0	-1.24	0.102193	0.311135	0	-1.64	0.000311	0.005219	1	2
3	FBgn0011286	Ryanodine receptor 44F	Rya-r44F	-1.06	0.527229	0.999395	0	-1.26	0.012428	0.447594	0	-1.33	0.00236	0.06836	0	-1.41	0.000318	0.012483	0	-1.62	2e-06	0.000127	1	-1.79	0	2e-06	1	-1.63	1e-06	6.9e-05	1	-1.59	3e-06	0.00014	1	-1.34	0.001909	0.024648	0	-1.45	0.000127	0.002391	0	-1.67	1e-06	2.3e-05	1	3
5	FBgn0039239	CG13641	CG13641	-1.08	0.442838	0.999395	0	1.21	0.066934	0.846181	0	2.14	0	0	1	1.79	0	5.6e-05	1	1.47	0.00033	0.009632	0	2	0	1e-06	1	1.87	0	6e-06	1	1.52	0.000117	0.00295	1	1.49	0.000239	0.004591	0	1.5	0.00019	0.00334	0	1.88	0	3e-06	1	5
7	FBgn0042086	Tetraspanin 42Eb	Tsp42Eb	-1.3	0.090397	0.999395	0	1.13	0.412194	0.97412	0	1.7	0.000948	0.036104	1	1.75	0.000533	0.018299	1	1.47	0.014058	0.16815	0	1.83	0.000201	0.004974	1	1.64	0.001958	0.033331	1	1.68	0.001268	0.020444	1	1.33	0.06736	0.266221	0	1.05	0.728751	0.879397	0	1.63	0.002144	0.025647	1	7
5	FBgn0031562	CG3604	CG3604	-1.16	0.48888	0.999395	0	1.08	0.730528	0.988753	0	1.82	0.006621	0.128197	0	2.41	0.000113	0.005631	1	1.88	0.004277	0.07263	0	2.52	5.8e-05	0.001746	1	2.22	0.000396	0.009368	1	2.34	0.000185	0.004247	1	1.69	0.01685	0.114704	0	1.46	0.111203	0.325486	0	2.16	0.000628	0.009307	1	5
5	FBgn0038346	CG14872	CG14872	-1.02	0.897508	0.999395	0	1.31	0.14793	0.947216	0	1.75	0.003807	0.092161	0	1.86	0.001444	0.039536	1	1.76	0.003257	0.059628	0	2.94	0	1.8e-05	1	2.62	3e-06	0.00013	1	2.21	6.7e-05	0.001869	1	1.7	0.00568	0.055881	0	1.27	0.199825	0.458332	0	1.88	0.001124	0.015091	1	5
5	FBgn0030157	CG1468	CG1468	1.02	0.889322	0.999395	0	1.29	0.150241	0.947216	0	1.67	0.005248	0.111257	0	1.82	0.001272	0.035945	1	1.66	0.005484	0.088127	0	2.09	9.7e-05	0.00275	1	2.2	3.7e-05	0.001277	1	2.08	0.000111	0.002819	1	1.39	0.065338	0.262732	0	1.14	0.474162	0.718319	0	1.82	0.001249	0.016551	1	5
5	FBgn0051086	CG31086	CG31086	-1.12	0.546206	0.999395	0	1.56	0.025524	0.610036	0	1.78	0.004138	0.096439	0	1.88	0.001844	0.047526	1	1.7	0.0084	0.118851	0	2.8	2e-06	9.6e-05	1	2.4	3.2e-05	0.001167	1	2.19	0.000159	0.003724	1	1.69	0.008631	0.073691	0	-1	0.982373	0.994434	0	1.76	0.005036	0.04789	1	5
5	FBgn0040850	CG15210	CG15210	-1.12	0.458297	0.999395	0	1.09	0.567557	0.984159	0	1.57	0.004621	0.103416	0	1.72	0.000875	0.026876	1	1.47	0.015121	0.177375	0	2.42	0	2.3e-05	1	2.17	5e-06	0.000235	1	1.62	0.002589	0.035121	1	1.49	0.012147	0.091557	0	1.21	0.222091	0.485836	0	1.73	0.000778	0.011138	1	5
7	FBgn0038179	CG9312	CG9312	1.1	0.553645	0.999395	0	1.4	0.026904	0.62264	0	1.48	0.010392	0.17075	0	1.67	0.001045	0.030931	1	1.18	0.303271	0.829604	0	2.37	0	2.2e-05	1	1.68	0.002331	0.037776	1	2.24	1e-06	6.7e-05	1	1.28	0.100836	0.333878	0	1.16	0.336237	0.604116	0	1.7	0.00193	0.023481	1	7
7	FBgn0030347	CG15739	CG15739	1.05	0.757662	0.999395	0	1.18	0.260098	0.964139	0	1.38	0.026089	0.281155	0	1.71	0.000393	0.014565	1	1.3	0.069331	0.441999	0	1.76	0.000197	0.00487	1	1.73	0.000277	0.006981	1	1.63	0.001097	0.018222	1	1.48	0.007593	0.068691	0	1.24	0.134675	0.366295	0	1.52	0.004606	0.044879	1	7
7	FBgn0034756	Cyp6d2	Cyp6d2	1.18	0.13028	0.999395	0	1.79	1e-06	0.000879	1	2.8	0	0	1	1.48	0.000465	0.016469	0	1.39	0.003099	0.057298	0	1.6	3.8e-05	0.001211	1	1.52	0.000217	0.005734	1	1.51	0.000241	0.005273	1	1.24	0.043129	0.206989	0	1.26	0.033302	0.155565	0	1.51	0.000282	0.004847	1	7
5	FBgn0002868	Metallothionein A	MtnA	1.05	0.805657	0.999395	0	1.75	0.005895	0.324228	0	1.94	0.001345	0.046174	1	1.6	0.019397	0.220127	0	1.58	0.023509	0.230105	0	2.12	0.000309	0.007065	1	1.85	0.002701	0.041813	1	2.09	0.00041	0.008254	1	1.53	0.035411	0.183478	0	1.32	0.163065	0.409397	0	2.38	4.5e-05	0.001064	1	5
2	FBgn0030702			1.13	0.105281	0.999395	0	-1.02	0.765537	0.990573	0	-1.03	0.71024	0.92691	0	-1.19	0.02935	0.278744	0	-1.19	0.027814	0.257838	0	-1.52	1e-06	6.4e-05	1	-1.62	0	4e-06	1	-1.52	1e-06	6e-05	1	-1.26	0.003622	0.040179	0	-1.23	0.010451	0.072688	0	-1.54	1e-06	2.3e-05	1	2
5	FBgn0034511	CG13422	CG13422	-1.21	0.345536	0.999395	0	1.02	0.93164	0.997504	0	1.03	0.894642	0.981765	0	1.08	0.679761	0.945886	0	1.67	0.011344	0.145053	0	2.11	0.000345	0.007678	1	2.42	3.5e-05	0.001226	1	3.34	1e-06	3.4e-05	1	1.66	0.01267	0.09452	0	1.26	0.239089	0.506687	0	2.57	1.1e-05	0.000336	1	5
5	FBgn0065032	Arpc3B	Arpc3B	-1.17	0.52429	0.999395	0	1.45	0.143153	0.946789	0	1.41	0.175485	0.613197	0	1.86	0.027468	0.268856	0	2.07	0.00543	0.087575	0	2.66	0.000264	0.006197	1	2.19	0.002904	0.044278	1	2.51	0.000554	0.010577	1	1.49	0.116522	0.360941	0	1.33	0.261159	0.529458	0	2.27	0.001931	0.023481	1	5
5	FBgn0040653	Immune induced molecule 4	IM4	1.03	0.907512	0.999395	0	-1.04	0.859397	0.996946	0	1.35	0.219061	0.665615	0	1.87	0.011167	0.154808	0	1.65	0.042287	0.334731	0	2.4	0.000566	0.011627	1	2.12	0.00278	0.042837	1	2.39	0.000581	0.010991	1	1.6	0.056357	0.242811	0	-1.09	0.714388	0.873225	0	2.13	0.002497	0.028689	1	5
5	FBgn0025583	Immune induced molecule 2	IM2	-1.14	0.598486	0.999395	0	1.09	0.710947	0.988335	0	1.51	0.089141	0.492594	0	1.91	0.009093	0.138383	0	1.79	0.017868	0.195725	0	2.64	0.000149	0.003842	1	2.33	0.000797	0.016578	1	2.33	0.000787	0.014089	1	1.59	0.058942	0.247774	0	1.11	0.674207	0.850686	0	2.1	0.002903	0.032186	1	5
5	FBgn0040551	CG11686	CG11686	-1.21	0.377989	0.999395	0	1.39	0.133063	0.940266	0	1.56	0.063458	0.432208	0	1.62	0.028607	0.274653	0	1.83	0.006826	0.103256	0	2.06	0.001379	0.023427	1	2.15	0.000748	0.015734	1	2.08	0.001221	0.019858	1	1.61	0.030992	0.169109	0	1.25	0.296214	0.565694	0	2.04	0.00157	0.019877	1	5
5	FBgn0051469	CG31469	CG31469	1.08	0.682903	0.999395	0	1.94	0.000625	0.093359	0	1.56	0.018522	0.233752	0	1.73	0.00426	0.086027	0	1.47	0.040231	0.324426	0	1.96	0.000556	0.011475	1	2.1	0.00051	0.01159	1	2.03	0.00029	0.006159	1	1.66	0.007761	0.069871	0	1.14	0.464579	0.712526	0	1.94	0.000674	0.009858	1	5
5	FBgn0039593	CG9989	CG9989	1.33	0.160718	0.999395	0	1.17	0.445504	0.974172	0	1.75	0.006617	0.128197	0	1.35	0.138928	0.606249	0	1.29	0.244841	0.772554	0	2.22	0.000188	0.004706	1	2.24	0.000162	0.004543	1	2.02	0.000862	0.015037	1	1.51	0.043455	0.207487	0	1.66	0.013817	0.088639	0	1.94	0.001608	0.020287	1	5
5	FBgn0032140	CG13117	CG13117	1.07	0.692861	0.999395	0	1.44	0.048116	0.764095	0	1.71	0.004381	0.099815	0	1.77	0.002613	0.06048	0	1.69	0.005165	0.084342	0	2.34	1.8e-05	0.000633	1	2.07	0.000181	0.004984	1	2.09	0.000145	0.003439	1	1.66	0.006828	0.063518	0	1.4	0.067265	0.241914	0	1.93	0.000617	0.009179	1	5
5	FBgn0040735	CG16836	CG16836	-1.41	0.115986	0.999395	0	1.22	0.367494	0.972321	0	1.86	0.005577	0.114732	0	2.01	0.001988	0.050259	0	1.79	0.008978	0.124158	0	2.45	0.000109	0.002975	1	2.2	0.000549	0.012205	1	2.39	0.000155	0.003649	1	1.36	0.154797	0.418893	0	1.02	0.936735	0.976401	0	1.89	0.004526	0.044328	1	5
5	FBgn0053258	CG33258	CG33258	-1.07	0.711668	0.999395	0	1.27	0.196519	0.957756	0	1.71	0.005446	0.113222	0	1.71	0.00534	0.099279	0	1.67	0.00739	0.109031	0	2.23	5.8e-05	0.001746	1	2.29	3.7e-05	0.001296	1	2.21	7.2e-05	0.001981	1	1.47	0.043555	0.20774	0	1.23	0.261215	0.529458	0	1.77	0.003035	0.03325	1	5
5	FBgn0024361	Tetraspanin 2A	Tsp2A	-1.01	0.931898	0.999703	0	1.32	0.109213	0.92052	0	1.41	0.046648	0.373897	0	1.64	0.004998	0.095625	0	1.64	0.005318	0.086303	0	2.2	2.1e-05	0.000716	1	1.96	0.000216	0.005719	1	1.77	0.00142	0.02228	1	1.48	0.023592	0.141927	0	1.19	0.301399	0.571619	0	1.69	0.003207	0.034493	1	5
5	FBgn0043841	virus-induced RNA 1	vir-1	1.18	0.262653	0.999395	0	1.25	0.136784	0.940266	0	1.39	0.03119	0.310443	0	1.39	0.032437	0.297231	0	1.33	0.063059	0.420551	0	2.22	2e-06	8.1e-05	1	1.99	2.1e-05	0.000819	1	1.96	3e-05	0.000938	1	1.47	0.012806	0.095161	0	1.36	0.042291	0.182029	0	1.63	0.001682	0.020935	1	5
7	FBgn0040972	CG16978	CG16978	-1.04	0.835296	0.999395	0	1.13	0.506008	0.981307	0	1.27	0.182992	0.625638	0	1.22	0.260478	0.746909	0	1.34	0.106699	0.552001	0	2.1	9.7e-05	0.002741	1	2.01	0.000227	0.005935	1	2	0.000256	0.005553	1	1.3	0.148887	0.409612	0	1.19	0.331535	0.598744	0	2.1	9.7e-05	0.002066	1	7
7	FBgn0040736	Immune induced molecule 3	IM3	-1.16	0.502779	0.999395	0	1.15	0.521373	0.981307	0	1.11	0.616268	0.895318	0	1.31	0.218131	0.704606	0	1.47	0.077578	0.469484	0	2.05	0.001424	0.023931	1	1.96	0.002804	0.043058	1	2.14	0.000816	0.014412	1	1.51	0.059602	0.249116	0	1.07	0.741378	0.88651	0	2.05	0.001476	0.018889	1	7
7	FBgn0029507	Tetraspanin 42Ed	Tsp42Ed	-1.06	0.712985	0.999395	0	1.22	0.194636	0.957756	0	1.4	0.029597	0.301314	0	1.49	0.011111	0.154631	0	1.41	0.026414	0.249797	0	2.16	5e-06	0.000209	1	1.85	0.000156	0.004424	1	1.73	0.000646	0.011991	1	1.46	0.015221	0.106848	0	1.22	0.193492	0.45068	0	1.88	0.000115	0.002351	1	7
7	FBgn0038658	CG14292	CG14292	-1.19	0.251782	0.999395	0	-1.02	0.910922	0.997504	0	1.4	0.031198	0.310443	0	1.63	0.002139	0.053241	0	1.58	0.004023	0.069313	0	1.85	0.000145	0.003738	1	1.6	0.002947	0.044769	1	1.64	0.001975	0.028788	1	1.12	0.454387	0.722501	0	1.14	0.407136	0.666891	0	1.79	0.000293	0.004992	1	7
7	FBgn0035112	CG13877	CG13877	-1.05	0.750657	0.999395	0	1.18	0.239411	0.960504	0	1.44	0.010329	0.170469	0	1.42	0.013854	0.179072	0	1.31	0.053924	0.385238	0	1.89	2.3e-05	0.000798	1	1.73	0.000197	0.005337	1	1.92	6.5e-05	0.00181	1	1.43	0.012741	0.09473	0	1.16	0.29799	0.567837	0	1.68	0.000397	0.006306	1	7
7	FBgn0039756	CG9743	CG9743	1.14	0.262925	0.999395	0	1.26	0.053348	0.78441	0	1.25	0.062519	0.428473	0	1.17	0.190252	0.671014	0	1.21	0.108195	0.555617	0	1.79	8e-06	0.000334	1	1.71	3e-05	0.001104	1	1.72	2.3e-05	0.000744	1	1.48	0.001707	0.02264	0	1.28	0.040421	0.176582	0	1.62	0.00013	0.002597	1	7
7	FBgn0010038	Glutathione S transferase D2	GstD2	-1.06	0.685078	0.999395	0	1.21	0.16888	0.949455	0	1.53	0.002328	0.067698	0	1.23	0.129638	0.589648	0	1.28	0.072068	0.449824	0	1.65	0.000462	0.009753	1	1.67	0.000349	0.008486	1	1.62	0.000648	0.012006	1	1.46	0.006137	0.059275	0	1.19	0.200477	0.459347	0	1.59	0.000976	0.013486	1	7
7	FBgn0050026	CG30026	CG30026	-1	0.98274	0.999703	0	1.07	0.516441	0.981307	0	1.34	0.004377	0.099815	0	1.22	0.055428	0.394263	0	1.42	0.000832	0.020374	0	1.88	0	4e-06	1	1.66	4e-06	0.000191	1	1.82	0	1e-05	1	1.4	0.001282	0.01806	0	1.31	0.008182	0.061525	0	1.59	2.1e-05	0.000552	1	7
7	FBgn0037906	Peptidoglycan recognition protein LB	PGRP-LB	1.14	0.300741	0.999395	0	1.13	0.348385	0.970462	0	1.14	0.31688	0.748498	0	1.34	0.024149	0.250543	0	1.39	0.010335	0.135991	0	2	1e-06	4.9e-05	1	1.57	0.000696	0.014813	1	1.52	0.001546	0.02391	1	1.4	0.009029	0.07608	0	1.16	0.251386	0.517861	0	1.58	0.000587	0.008774	1	7
7	FBgn0030263	CG2076	CG2076	1.12	0.295365	0.999395	0	1.21	0.088315	0.898731	0	1.34	0.009648	0.164849	0	1.22	0.069115	0.44221	0	1.23	0.064474	0.426099	0	1.56	0.000122	0.003278	1	1.52	0.000268	0.006778	1	1.65	2.2e-05	0.000712	1	1.31	0.014894	0.105205	0	1.14	0.241126	0.508602	0	1.57	0.000116	0.002359	1	7
3	FBgn0011556	zetaTrypsin	zetaTry	1.09	0.329613	0.999395	0	-1.15	0.124577	0.929629	0	-1.23	0.02862	0.297872	0	-1.62	2e-06	0.000232	1	-1.52	2e-05	0.000983	1	-1.3	0.005149	0.062908	0	-1.62	2e-06	8.6e-05	1	-1.54	1.2e-05	0.000431	1	-1.49	4.3e-05	0.001087	0	-1.33	0.002831	0.028383	0	-1.67	1e-06	2.2e-05	1	3
2	FBgn0011230	purity of essence	poe	1.03	0.768947	0.999395	0	1.04	0.73388	0.988802	0	-1.02	0.844937	0.96941	0	-1.08	0.436808	0.859715	0	-1.23	0.054619	0.387878	0	-1.35	0.00528	0.06395	0	-1.52	0.000156	0.004424	1	-1.53	0.000124	0.003088	1	-1.48	0.000385	0.006834	0	-1.49	0.000313	0.004995	0	-1.72	2e-06	8.8e-05	1	2
3	FBgn0028274	nucleostemin 3	ns3	1.27	0.208488	0.999395	0	-1.9	0.001052	0.125658	0	-1.19	0.348634	0.769098	0	1.06	0.752135	0.961004	0	-1.27	0.204801	0.724271	0	-1.58	0.016736	0.149555	0	-1.94	0.00076	0.015931	1	-1.78	0.002905	0.038296	1	-1.59	0.015295	0.107229	0	-1.41	0.097861	0.302954	0	-1.76	0.003503	0.036548	1	3
7	FBgn0037637	CG9836	CG9836	1.25	0.135315	0.999395	0	1.3	0.078245	0.877013	0	1.32	0.063249	0.431228	0	1.24	0.150937	0.623618	0	1.38	0.033391	0.289721	0	1.55	0.004383	0.055733	0	1.59	0.002524	0.039829	1	1.58	0.003113	0.040181	1	1.36	0.04379	0.208481	0	1.08	0.597557	0.804805	0	1.62	0.00177	0.02183	1	7
2	FBgn0022710	Adenylyl cyclase 35C	Ac13E	1.02	0.869205	0.999395	0	-1.08	0.449972	0.976335	0	-1.68	4e-06	0.000658	1	-1.46	0.000434	0.015699	0	-1.46	0.000478	0.012884	0	-1.57	4.7e-05	0.001469	1	-1.19	0.096493	0.442401	0	-1.69	2e-05	0.000657	1	-1.29	0.01652	0.113337	0	-1.38	0.002445	0.025465	0	-1.56	5e-05	0.001167	1	2
7	FBgn0030158	CG9686	CG9686	1.03	0.870901	0.999395	0	1.2	0.299811	0.968665	0	1.12	0.481907	0.843935	0	-1.01	0.968603	0.995382	0	1.02	0.90267	0.98988	0	2.11	1.7e-05	0.000614	1	1.49	0.014642	0.140901	0	1.63	0.003242	0.041217	1	1.11	0.52663	0.772894	0	-1.12	0.475669	0.719608	0	1.84	0.000317	0.00529	1	7
7	FBgn0053280	CG33280	CG33280	-1.34	0.029028	0.964922	0	1.15	0.27238	0.964139	0	1.45	0.011005	0.176197	0	1.43	0.007819	0.126549	0	1.38	0.015743	0.181371	0	1.85	1.4e-05	0.000524	1	1.4	0.01137	0.118617	0	1.53	0.001811	0.02708	1	1.45	0.005303	0.053297	0	1.29	0.05304	0.209098	0	1.58	0.000857	0.012116	1	7
7	FBgn0038250	CG3505	CG3505	1.02	0.838668	0.999395	0	1.02	0.894871	0.997504	0	1.38	0.008672	0.155314	0	1.45	0.00241	0.057502	0	1.36	0.010603	0.138412	0	1.91	1e-06	4.9e-05	1	1.42	0.003967	0.055529	0	1.54	0.000484	0.009518	1	1.3	0.028755	0.160911	0	1.28	0.040379	0.176455	0	1.54	0.000536	0.008169	1	7
7	FBgn0038020	Glutathione S transferase D9	GstD9	-1.1	0.455395	0.999395	0	1.27	0.07393	0.868144	0	1.5	0.003209	0.08272	0	1.31	0.044678	0.354134	0	1.33	0.035304	0.300762	0	1.53	0.00213	0.032434	1	1.44	0.008301	0.09399	0	1.82	3.3e-05	0.000995	1	1.23	0.128091	0.380251	0	1.08	0.582165	0.794988	0	1.53	0.004485	0.043993	1	7
7	FBgn0037503	CG14598	CG14598	1.01	0.92609	0.999703	0	1.12	0.359442	0.971784	0	1.59	0.000458	0.022714	1	1.67	0.000109	0.005536	1	1.39	0.010932	0.141075	0	1.48	0.002669	0.038762	0	1.3	0.041405	0.276025	0	1.52	0.00294	0.038605	1	1.45	0.003957	0.042809	0	1.37	0.013319	0.086541	0	1.71	6e-05	0.00137	1	7
2	FBgn0005638	slow border cells	slbo	-1.01	0.9099	0.999395	0	-1.17	0.148618	0.947216	0	-1.57	9.3e-05	0.006892	1	-1.15	0.194964	0.674546	0	-1.12	0.286066	0.817766	0	-1.22	0.071761	0.373566	0	-1.46	0.000725	0.015356	0	-1.72	4e-06	0.000166	1	-1.43	0.001384	0.019211	0	-1.2	0.099041	0.305251	0	-1.52	0.000251	0.004396	1	2
2	FBgn0038017	CG4115	CG4115	1	0.996129	0.999838	0	1.09	0.490481	0.979862	0	-1.03	0.815533	0.959473	0	-1.15	0.234865	0.722265	0	-1.28	0.046395	0.355212	0	-1.27	0.053268	0.313434	0	-1.48	0.001771	0.030829	0	-1.53	0.00079	0.01411	1	-1.28	0.040618	0.199824	0	-1.49	0.001612	0.018582	0	-1.5	0.001193	0.015856	1	2
2	FBgn0010482	lethal (2) 01289	l(2)01289	-1.07	0.600021	0.999395	0	-1.38	0.021771	0.586776	0	-1.38	0.020592	0.24846	0	-1.26	0.091079	0.506229	0	-1.47	0.006107	0.095114	0	-1.38	0.019843	0.167629	0	-1.31	0.051622	0.312561	0	-1.65	0.000522	0.01008	1	-1.3	0.055053	0.239545	0	-1.42	0.011607	0.078131	0	-1.59	0.001095	0.014844	1	2
2	FBgn0000116	Arginine kinase	Argk	-1.16	0.107923	0.999395	0	-1.26	0.01264	0.450284	0	-1.38	0.000812	0.032658	0	-1.43	0.000207	0.008825	0	-1.4	0.000466	0.012612	0	-1.32	0.003132	0.043429	0	-1.33	0.002501	0.039563	0	-1.51	3.2e-05	0.00097	1	-1.32	0.003538	0.039444	0	-1.42	0.00031	0.004973	0	-1.62	2e-06	6.3e-05	1	2
5	FBgn0002531	Larval cuticle protein 1	Lcp1	1.6	0.243509	0.999395	0	1.19	0.651168	0.988335	0	1.83	0.136382	0.569485	0	2.04	0.220649	0.707251	0	1.74	0.055659	0.390831	0	1.33	0.376426	0.790625	0	1.45	0.340871	0.763061	0	4.16	0.001618	0.024911	1	1.01	0.985656	0.995348	0	1.43	0.52821	0.759746	0	3.22	0.000149	0.002888	1	5
7	FBgn0040828	CG13306	CG13306	-1.21	0.093109	0.999395	0	1.11	0.38024	0.97412	0	1.07	0.531835	0.862395	0	1.04	0.732516	0.957211	0	1.23	0.07703	0.468994	0	1.1	0.382799	0.796186	0	1.3	0.025468	0.201348	0	1.64	0.000193	0.00439	1	1.31	0.020894	0.130975	0	1.07	0.533398	0.763615	0	1.8	3e-06	9.1e-05	1	7
7	FBgn0042187	CG17234	CG17234	-1.21	0.284515	0.999395	0	-1.07	0.664652	0.988335	0	1.13	0.469444	0.837621	0	1.26	0.170783	0.650709	0	1.14	0.43779	0.894962	0	1.51	0.015695	0.142286	0	1.56	0.008949	0.099264	0	1.74	0.001364	0.021507	1	1.51	0.015777	0.109668	0	1.41	0.063962	0.234592	0	1.67	0.002827	0.031522	1	7
7	FBgn0031439			-1.09	0.417152	0.999395	0	1.07	0.534151	0.984159	0	1.14	0.284957	0.727414	0	1.11	0.377703	0.83005	0	1.17	0.161549	0.658061	0	1.47	0.000955	0.01746	0	1.4	0.003549	0.051433	0	1.71	1e-05	0.000372	1	1.27	0.050981	0.228297	0	1.43	0.001951	0.021567	0	1.66	2.5e-05	0.000645	1	7
3	FBgn0030596	CG12398	CG12398	1.16	0.252501	0.999395	0	-1.18	0.262807	0.964139	0	-1.19	0.182077	0.624758	0	-1.57	0.001095	0.031929	1	-1.57	0.000996	0.02354	1	-1.54	0.001629	0.026564	1	-1.54	0.001605	0.028634	1	-1.47	0.004622	0.053499	0	-1.43	0.007674	0.069281	0	-1.46	0.005333	0.045434	0	-1.94	4e-06	0.000139	1	3
5	FBgn0035412	CG14957	CG14957	-1.18	0.440372	0.999395	0	-1.36	0.154508	0.947216	0	1.21	0.368716	0.781418	0	3.04	3e-06	0.000296	1	2.39	0.000142	0.004809	1	2.3	0.000264	0.006197	1	2.65	2.7e-05	0.001004	1	1.62	0.027114	0.180736	0	1.49	0.067736	0.266985	0	1.09	0.726311	0.878484	0	2.53	5.6e-05	0.001301	1	5
5	FBgn0031910	CG15818	CG15818	-1.12	0.587539	0.999395	0	1.27	0.246829	0.964139	0	1.46	0.070768	0.450457	0	2.05	0.000835	0.025837	1	1.42	0.090002	0.507574	0	3.15	1e-06	3.5e-05	1	2.31	0.000132	0.00384	1	1.83	0.004315	0.050822	0	1.48	0.05807	0.245671	0	-1.03	0.887566	0.95663	0	1.81	0.005056	0.047985	1	5
7	FBgn0046322	p38c	p38c	1.03	0.885551	0.999395	0	1.29	0.169739	0.949455	0	1.59	0.015877	0.214052	0	1.22	0.298981	0.778993	0	1.22	0.290734	0.819281	0	2.65	2e-06	0.000122	1	1.8	0.002467	0.039161	1	1.54	0.024784	0.171019	0	1.38	0.119487	0.365864	0	1.26	0.218873	0.482001	0	1.91	0.000973	0.013464	1	7
7	FBgn0038842	CG5630	CG5630	1.1	0.53646	0.999395	0	1.05	0.75433	0.989815	0	1.1	0.53703	0.864364	0	1.25	0.139515	0.606707	0	1.15	0.342573	0.853121	0	1.75	0.000387	0.008487	1	1.75	0.001139	0.022212	1	1.41	0.02308	0.16373	0	1.4	0.028342	0.159484	0	1.3	0.087283	0.283222	0	1.68	0.000954	0.013224	1	7
7	FBgn0030079	CG7267	CG7267	-1.09	0.606406	0.999395	0	1.21	0.257377	0.964139	0	1.29	0.129088	0.562028	0	1.18	0.323083	0.797245	0	1.16	0.36313	0.86393	0	1.88	0.000312	0.007116	1	1.74	0.001448	0.026372	1	1.51	0.015974	0.12974	0	1.21	0.243837	0.536919	0	1.09	0.602017	0.807172	0	1.67	0.003035	0.03325	1	7
7	FBgn0033234	CG8791	CG8791	-1.07	0.539343	0.999395	0	1.05	0.623996	0.988335	0	1.18	0.118609	0.543063	0	1.26	0.03149	0.29212	0	1.35	0.005529	0.088578	0	1.9	0	6e-06	1	2.01	0	1e-06	1	1.42	0.001386	0.021785	0	1.32	0.010121	0.081918	0	1.41	0.001703	0.01943	0	1.6	3.1e-05	0.000767	1	7
2	FBgn0000075	alpha methyl dopa-resistant	amd	1.01	0.895002	0.999395	0	-1.03	0.702306	0.988335	0	-1.13	0.156939	0.592534	0	-1.31	0.002825	0.063383	0	-1.15	0.118764	0.574432	0	-1.34	0.001203	0.020969	0	-1.53	2.7e-05	0.001006	1	-1.43	0.000107	0.002754	0	-1.48	2.6e-05	0.000718	0	-1.4	0.00023	0.003934	0	-1.57	2e-06	7.2e-05	1	2
2	FBgn0037555	Ada2b	Ada2b	1.1	0.437253	0.999395	0	-1.08	0.52763	0.982947	0	1	0.992867	0.997936	0	1.08	0.538326	0.906683	0	-1.24	0.088837	0.503371	0	-1.4	0.008404	0.090396	0	-1.67	0.000104	0.003177	1	-1.48	0.002232	0.031437	0	-1.42	0.006572	0.062029	0	-1.39	0.009922	0.070086	0	-1.82	9e-06	0.000275	1	2
4	FBgn0033517	CG12897	CG12897	1.15	0.283525	0.999395	0	-1.12	0.358334	0.971596	0	-1.17	0.264792	0.711644	0	-1.24	0.092783	0.510519	0	-1.11	0.470225	0.904661	0	-1.03	0.825904	0.960073	0	1.56	0.002275	0.036963	1	1.08	0.534076	0.818327	0	1.23	0.106828	0.344518	0	1.21	0.137433	0.37111	0	1.74	0.000178	0.003341	1	4
7	FBgn0045761	CHKov1	CHKov1	1.02	0.858754	0.999395	0	1.17	0.176184	0.950325	0	1.36	0.009021	0.158114	0	-1.01	0.95271	0.995382	0	1.31	0.034641	0.29666	0	1.49	0.000872	0.016198	0	1.5	0.000759	0.015931	1	1.18	0.145272	0.467705	0	1.22	0.089882	0.312267	0	-1.02	0.829999	0.928066	0	1.56	0.000252	0.00441	1	7
2	FBgn0029662	CG12206	CG12206	1.08	0.631259	0.999395	0	-1.05	0.689611	0.988335	0	-1.16	0.285374	0.727553	0	-1.96	0.000679	0.021879	1	-1.11	0.408126	0.882475	0	-1.58	0.002447	0.036107	1	1.01	0.97264	0.995003	0	1.04	0.846393	0.953903	0	-1.75	0.015384	0.107683	0	-1.15	0.323037	0.591193	0	-1.87	0.001346	0.017538	1	2
5	FBgn0034647	poor Imd response upon knock-in	pirk	-1.25	0.348944	0.999395	0	1.01	0.957053	0.99777	0	1.25	0.360691	0.775724	0	-1.01	0.98076	0.997497	0	1.75	0.039508	0.32117	0	3.18	1.2e-05	0.000459	1	1.89	0.010276	0.110181	0	1.69	0.032959	0.205037	0	1.28	0.351582	0.6434	0	1.43	0.145644	0.384262	0	2.21	0.001653	0.020689	1	5
5	FBgn0032351			-1.16	0.574496	0.999395	0	-1.27	0.5158	0.981307	0	1.05	0.889432	0.980922	0	1.69	0.027183	0.267657	0	1.93	0.006854	0.103562	0	3.08	5e-06	0.000209	1	2.07	0.007275	0.086306	0	2.64	0.014731	0.123466	0	1.88	0.009244	0.077187	0	2.05	0.007859	0.059581	0	1.89	0.004398	0.043302	1	5
7	FBgn0032536	Ance-3	Ance-3	1.2	0.250526	0.999395	0	1.16	0.329647	0.968964	0	1.03	0.862497	0.973416	0	1.09	0.586193	0.920819	0	1.03	0.844887	0.985423	0	1.61	0.003079	0.043017	1	1.34	0.062997	0.35223	0	1.13	0.435747	0.761211	0	1.36	0.052842	0.23348	0	1.39	0.039681	0.174682	0	1.77	0.000502	0.007738	1	7
7	FBgn0015010	Antigen 5-related	Ag5r	1.11	0.544598	0.999395	0	1.15	0.416117	0.97412	0	1.22	0.258584	0.705533	0	1.15	0.425585	0.854927	0	1.48	0.025845	0.245822	0	2.01	0.000143	0.003697	1	1.45	0.033615	0.243413	0	1.59	0.009033	0.088549	0	1.1	0.567661	0.79905	0	1.03	0.860872	0.9438	0	1.77	0.001481	0.018924	1	7
7	FBgn0036951	CG7017	CG7017	-1.32	0.112697	0.999395	0	-1.06	0.746319	0.989815	0	-1.03	0.879665	0.978687	0	1.05	0.770788	0.966518	0	1.16	0.378071	0.871202	0	2.03	0.000115	0.003115	1	1.25	0.195887	0.617511	0	1.53	0.016142	0.130339	0	1.49	0.023156	0.140204	0	1.06	0.748052	0.889785	0	1.72	0.002422	0.028073	1	7
7	FBgn0037100	capa receptor	capaR	-1.02	0.886499	0.999395	0	1.1	0.471725	0.978931	0	1.41	0.013555	0.198644	0	1.34	0.03291	0.299793	0	1.21	0.157904	0.652311	0	1.62	0.00063	0.012774	1	1.41	0.012571	0.127149	0	1.39	0.017902	0.139385	0	1.27	0.083331	0.301382	0	1.17	0.280954	0.551956	0	1.6	0.002268	0.026766	1	7
7	FBgn0015541	slamdance	sda	1.09	0.301781	0.999395	0	-1.1	0.248024	0.964139	0	1.13	0.147005	0.580767	0	1.07	0.436908	0.859715	0	1.21	0.024735	0.238196	0	1.54	2e-06	0.000113	1	1.5	8e-06	0.000341	0	1.49	9e-06	0.000337	0	1.46	2.1e-05	0.000594	0	1.49	9e-06	0.000254	0	1.59	1e-06	2.3e-05	1	7
7	FBgn0033937	CG17388	CG17388	-1.11	0.489946	0.999395	0	-1.02	0.884032	0.997504	0	1	0.980601	0.996381	0	1.12	0.446277	0.864439	0	1.33	0.066566	0.434034	0	1.74	0.000575	0.011752	1	1.54	0.012067	0.123443	0	1.26	0.135759	0.451671	0	-1.16	0.340648	0.633449	0	1.07	0.650359	0.836697	0	1.58	0.003763	0.038407	1	7
7	FBgn0031219	CG13694	CG13694	1.13	0.293372	0.999395	0	1.18	0.159127	0.949455	0	1.24	0.066952	0.440262	0	1.29	0.031047	0.289854	0	1.47	0.001448	0.031774	0	1.71	1.7e-05	0.000619	1	1.5	0.000801	0.016643	0	1.35	0.010144	0.09545	0	1.47	0.001384	0.019211	0	1.26	0.046253	0.192101	0	1.56	0.000253	0.004429	1	7
7	FBgn0030782	CG18358	CG18358	1.16	0.227609	0.999395	0	1.03	0.816312	0.994329	0	1.07	0.607965	0.892727	0	1.1	0.461268	0.873733	0	1.1	0.452037	0.900245	0	1.58	0.000489	0.01023	1	1.4	0.007968	0.091478	0	1.28	0.049631	0.266394	0	1.14	0.298835	0.59446	0	1.18	0.177723	0.428396	0	1.56	0.000648	0.009534	1	7
7	FBgn0050108	CG30108	CG30108	-1.18	0.232727	0.999395	0	1.14	0.344282	0.969629	0	1.27	0.096726	0.504128	0	1.5	0.004869	0.093977	0	1.3	0.068173	0.438102	0	1.53	0.003658	0.048619	1	1.29	0.076533	0.395007	0	1.42	0.014101	0.120282	0	1.19	0.211486	0.496337	0	1.12	0.412578	0.671871	0	1.52	0.003828	0.038891	1	7
7	FBgn0036789	allatostatin C receptor 2	AlCR2	1.14	0.355548	0.999395	0	1.32	0.048521	0.765528	0	1.54	0.002924	0.077968	0	1.35	0.033666	0.30457	0	1.39	0.021352	0.217074	0	1.62	0.000866	0.016149	1	1.43	0.011567	0.120105	0	1.42	0.014646	0.12302	0	1.23	0.132946	0.38629	0	1.01	0.939174	0.977747	0	1.52	0.003552	0.036941	1	7
2	FBgn0034051	Myelodysplasia/myeloid leukemia factor	Mlf	-1	0.992238	0.999703	0	-1.63	0.003625	0.251647	0	-1.68	0.002209	0.064677	0	-1.83	0.001147	0.032919	1	-1.46	0.021435	0.217412	0	-1.39	0.044601	0.280919	0	-1.33	0.085688	0.417564	0	-1.32	0.086624	0.361597	0	-1.46	0.037364	0.189928	0	-1.49	0.017005	0.101604	0	-1.67	0.002461	0.028424	1	2
7	FBgn0053983	obstructor-H	obst-H	1.11	0.325714	0.999395	0	1.03	0.769327	0.990771	0	1.23	0.061688	0.426919	0	1.51	0.000925	0.028069	1	1.26	0.036721	0.306866	0	1.49	0.00052	0.010837	0	1.32	0.022257	0.184005	0	1.29	0.02106	0.154746	0	1.12	0.305389	0.600642	0	1.25	0.040039	0.175437	0	1.57	9.8e-05	0.00207	1	7
3	FBgn0035620	CG5150	CG5150	1.14	0.550259	0.999395	0	-1.28	0.247905	0.964139	0	-2.06	0.001266	0.044984	1	-1.45	0.084844	0.491094	0	-1.65	0.022567	0.223546	0	-1.32	0.197627	0.622974	0	-1.22	0.39439	0.796842	0	-1.46	0.079774	0.348268	0	-1.73	0.01252	0.093561	0	-1.54	0.04704	0.194528	0	-1.95	0.002602	0.029634	1	3
1	FBgn0001128	Glycerol 3 phosphate dehydrogenase	Gpdh	1.03	0.672636	0.999395	0	-1.19	0.010122	0.407314	0	-1.36	1.5e-05	0.001643	0	-1.39	5e-06	0.000457	0	-1.4	4e-06	0.000258	0	-1.39	5e-06	0.000227	0	-1.49	0	1e-05	0	-1.4	3e-06	0.000136	0	-1.44	1e-06	3.7e-05	0	-1.37	1.5e-05	0.000386	0	-1.5	0	4e-06	1	1
1	FBgn0053968			1.11	0.797208	0.999395	0	-1.38	0.432448	0.974172	0	1.13	0.759211	0.944093	0	-1.44	0.419463	0.850376	0	-1.48	0.333661	0.849443	0	-1.28	0.502881	0.850865	0	-2.56	0.041121	0.275316	0	1.05	0.915336	0.975443	0	-2.72	0.059236	0.248297	0	-1.67	0.165766	0.412713	0	-8.43	0.001513	0.019251	1	1
2	FBgn0050438	CG30438	CG30438	-1.19	0.296397	0.999395	0	-1.02	0.921792	0.997504	0	1.49	0.142292	0.577713	0	1.3	0.225304	0.712238	0	1.76	0.012888	0.158133	0	1.2	0.223942	0.656164	0	-1	0.988609	0.997721	0	1.8	0.009938	0.094319	0	1.16	0.473984	0.735758	0	1.27	0.186053	0.439753	0	1.7	0.000962	0.013329	1	2
2	FBgn0038146	CG9799	CG9799	-1.09	0.176231	0.999395	0	-1.08	0.22899	0.958634	0	-1.2	0.008775	0.156009	0	-1.26	0.000803	0.024966	0	-1.16	0.032707	0.2851	0	-1.3	0.000176	0.004452	0	-1.39	6e-06	0.000277	0	-1.4	4e-06	0.000158	0	-1.37	1.1e-05	0.000345	0	-1.33	0.000241	0.00408	0	-1.5	0	4e-06	1	2
2	FBgn0033432			-1.01	0.865849	0.999395	0	1.04	0.545496	0.984159	0	-1.02	0.824119	0.963546	0	-1.12	0.112586	0.555532	0	-1.12	0.102049	0.54075	0	-1.41	9e-06	0.000371	0	-1.38	2.8e-05	0.001023	0	-1.36	5.8e-05	0.001646	0	-1.27	0.001379	0.0192	0	-1.29	0.000573	0.008045	0	-1.5	0	1.5e-05	1	2
2	FBgn0004650	female sterile (1) Nasrat	fs(1)N	1.05	0.475485	0.999395	0	1.06	0.43733	0.974172	0	-1.03	0.691086	0.920511	0	-1.15	0.049902	0.372705	0	-1.18	0.025313	0.241994	0	-1.33	0.000233	0.005611	0	-1.27	0.001294	0.024362	0	-1.22	0.007243	0.075325	0	-1.06	0.39808	0.681265	0	-1.08	0.309123	0.578718	0	-1.51	0	1.9e-05	1	2
2	FBgn0026061	Multiple inositol polyphosphate phosphatase 1	Mipp1	1.03	0.659982	0.999395	0	-1.04	0.574153	0.985816	0	-1.21	0.010729	0.173747	0	-1.34	0.000179	0.007954	0	-1.34	0.000159	0.005284	0	-1.25	0.00388	0.051006	0	-1.21	0.012919	0.129143	0	-1.27	0.00211	0.03032	0	-1.39	3.8e-05	0.000968	0	-1.45	2.1e-05	0.000525	0	-1.51	1e-06	2.6e-05	1	2
2	FBgn0033850	CG13331	CG13331	1.06	0.49453	0.999395	0	1.13	0.173734	0.950325	0	-1.03	0.724364	0.930845	0	-1.3	0.005211	0.097578	0	-1.26	0.011536	0.146655	0	-1.27	0.009175	0.095947	0	-1.36	0.001089	0.021455	0	-1.44	0.000159	0.003726	0	-1.48	4.6e-05	0.001154	0	-1.41	0.000319	0.005061	0	-1.51	2.4e-05	0.00062	1	2
2	FBgn0020306	domino	dom	1.02	0.905387	0.999395	0	-1.04	0.792509	0.99325	0	-1.01	0.94019	0.986316	0	-1.09	0.556598	0.911712	0	-1.09	0.556981	0.929016	0	-1.35	0.034424	0.240884	0	-1.24	0.121983	0.499212	0	-1.21	0.172235	0.510688	0	1.04	0.77369	0.909311	0	-1.04	0.801096	0.915604	0	-1.51	0.00419	0.041635	1	2
2	FBgn0037277			1.04	0.761574	0.999395	0	-1.14	0.264334	0.964139	0	-1.17	0.18308	0.625638	0	-1.16	0.254624	0.742871	0	-1.23	0.089274	0.504951	0	-1.36	0.012375	0.12076	0	-1.33	0.018193	0.161134	0	-1.36	0.010966	0.10003	0	-1.2	0.126083	0.377068	0	-1.19	0.15427	0.397624	0	-1.51	0.000905	0.01266	1	2
2	FBgn0003165	pumilio	pum	1.05	0.589449	0.999395	0	1.03	0.716612	0.988335	0	1.05	0.597911	0.890219	0	-1.03	0.767102	0.965719	0	-1.03	0.72118	0.967638	0	-1.34	0.001444	0.024196	0	-1.3	0.00472	0.062667	0	-1.23	0.023862	0.166963	0	-1.07	0.456193	0.723622	0	-1.03	0.774192	0.902675	0	-1.52	1.7e-05	0.000466	1	2
2	FBgn0053205	CG33205	CG33205	1.05	0.569169	0.999395	0	-1.19	0.056928	0.802478	0	-1.15	0.113744	0.535124	0	-1.25	0.014935	0.187638	0	-1.19	0.055547	0.390698	0	-1.35	0.001227	0.021314	0	-1.36	0.000949	0.019199	0	-1.29	0.004666	0.053895	0	-1.26	0.009728	0.079874	0	-1.39	0.000425	0.006375	0	-1.52	1.3e-05	0.000378	1	2
2	FBgn0026210			1.14	0.373681	0.999395	0	-1.51	0.006558	0.339238	0	-1.55	0.004036	0.095311	0	-1.3	0.106981	0.541451	0	-1.28	0.123132	0.582428	0	-1.34	0.069725	0.368311	0	-1.92	0.011644	0.120612	0	-1.43	0.01622	0.13066	0	-1.39	0.042587	0.205359	0	-1.27	0.140765	0.376978	0	-1.53	0.004991	0.047578	1	2
2	FBgn0016122	Angiotensin-converting enzyme-related	Acer	1.05	0.53083	0.999395	0	-1.09	0.23988	0.960504	0	-1.2	0.017647	0.226934	0	-1.28	0.002102	0.052631	0	-1.35	0.000204	0.006567	0	-1.3	0.000896	0.016501	0	-1.4	4e-05	0.001376	0	-1.42	2.3e-05	0.000736	0	-1.43	1.7e-05	0.000489	0	-1.4	4.6e-05	0.001026	0	-1.53	1e-06	2.5e-05	1	2
2	FBgn0028982	Spt6	Spt6	1.04	0.630988	0.999395	0	-1.07	0.448796	0.975272	0	-1.08	0.368257	0.781268	0	-1.09	0.336633	0.802626	0	-1.11	0.237973	0.765562	0	-1.4	0.000361	0.007983	0	-1.44	0.00013	0.003804	0	-1.34	0.002057	0.029686	0	-1.13	0.169982	0.44152	0	-1.09	0.350098	0.617187	0	-1.53	1.4e-05	0.000411	1	2
2	FBgn0034618	CG9485	CG9485	1	0.966779	0.999703	0	-1.18	0.037111	0.695651	0	-1.09	0.27233	0.717611	0	1	0.964784	0.995382	0	-1.05	0.534728	0.924097	0	-1.27	0.003042	0.042676	0	-1.32	0.000779	0.016299	0	-1.27	0.00299	0.039107	0	-1.11	0.189014	0.46826	0	-1.14	0.102764	0.311828	0	-1.54	1e-06	3.3e-05	1	2
2	FBgn0033661	CG13185	CG13185	1.17	0.054025	0.999395	0	1.02	0.788037	0.99325	0	-1.12	0.169115	0.605977	0	-1.21	0.022725	0.240786	0	-1.21	0.018517	0.200173	0	-1.29	0.002443	0.036079	0	-1.42	5.7e-05	0.00188	0	-1.34	0.000553	0.010574	0	-1.26	0.006062	0.05872	0	-1.34	0.00049	0.007112	0	-1.54	1e-06	5e-05	1	2
2	FBgn0027512	CG10254	CG10254	-1.03	0.811965	0.999395	0	1.05	0.736945	0.989139	0	-1.04	0.763876	0.944888	0	-1.09	0.520076	0.899928	0	-1.12	0.380842	0.871766	0	-1.45	0.005903	0.06972	0	-1.19	0.194124	0.615625	0	-1.38	0.017792	0.139048	0	-1.19	0.195564	0.47729	0	-1.2	0.163507	0.409781	0	-1.55	0.001493	0.019052	1	2
2	FBgn0034497	CG9090	CG9090	1.06	0.549583	0.999395	0	-1.24	0.026959	0.622795	0	-1.41	0.000713	0.029551	0	-1.38	0.001376	0.038092	0	-1.19	0.069408	0.441999	0	-1.38	0.001445	0.024196	0	-1.32	0.005036	0.065539	0	-1.2	0.059996	0.296821	0	-1.48	0.000114	0.002439	0	-1.49	8.8e-05	0.001753	0	-1.55	2.5e-05	0.000644	1	2
2	FBgn0046880	Odorant-binding protein 56b	Obp56b	1.13	0.290367	0.999395	0	1.03	0.777991	0.991978	0	-1.2	0.128184	0.560353	0	-1.25	0.062603	0.42101	0	-1.3	0.028681	0.262547	0	-1.28	0.038568	0.256695	0	-1.4	0.00983	0.106528	0	-1.38	0.006733	0.071565	0	-1.36	0.0098	0.080165	0	-1.48	0.001364	0.016452	0	-1.55	0.000344	0.005687	1	2
2	FBgn0036930	fat2	fat2	-1.1	0.190677	0.999395	0	-1.14	0.071927	0.867177	0	-1.25	0.003051	0.080051	0	-1.15	0.058133	0.406897	0	-1.23	0.005559	0.088578	0	-1.4	2.2e-05	0.00077	0	-1.41	1.5e-05	0.000611	0	-1.49	1e-06	5.3e-05	0	-1.2	0.015352	0.107511	0	-1.25	0.0037	0.034719	0	-1.56	0	5e-06	1	2
2	FBgn0002905	mutagen-sensitive 308	mus308	-1.02	0.877108	0.999395	0	1.02	0.876463	0.997504	0	1.09	0.446214	0.825893	0	-1.11	0.39223	0.836344	0	-1.21	0.106896	0.552554	0	-1.44	0.003372	0.045788	0	-1.28	0.0383	0.262351	0	-1.36	0.011986	0.106959	0	-1.09	0.466463	0.730654	0	-1.23	0.080645	0.270776	0	-1.56	0.000386	0.006187	1	2
2	FBgn0002527	Laminin B1	LanB1	-1.01	0.892082	0.999395	0	1	0.970322	0.99777	0	-1.28	0.000702	0.029451	0	-1.27	0.001148	0.032919	0	-1.39	1.2e-05	0.000628	0	-1.23	0.004384	0.055733	0	-1.3	0.000302	0.007544	0	-1.42	4e-06	0.000154	0	-1.43	3e-06	0.000118	0	-1.46	1e-06	3.8e-05	0	-1.56	0	1e-06	1	2
2	FBgn0032494	CG5945	CG5945	1.05	0.650583	0.999395	0	-1.08	0.444819	0.974172	0	-1.32	0.008559	0.153917	0	-1.28	0.017088	0.206831	0	-1.31	0.009333	0.127657	0	-1.05	0.637635	0.904378	0	-1.14	0.194878	0.61639	0	-1.29	0.015868	0.129157	0	-1.42	0.001002	0.014751	0	-1.47	0.00033	0.005189	0	-1.57	3.4e-05	0.000832	1	2
2	FBgn0026147	CG16833	CG16833	1.08	0.389546	0.999395	0	-1.16	0.086656	0.898613	0	-1.13	0.178268	0.617155	0	-1.19	0.051972	0.380388	0	-1.23	0.020989	0.214712	0	-1.43	0.000113	0.003077	0	-1.21	0.029114	0.220528	0	-1.48	2.8e-05	0.000891	0	-1.29	0.004801	0.049502	0	-1.18	0.063293	0.233011	0	-1.58	2e-06	7.9e-05	1	2
2	FBgn0015075	Dead-box-1	Ddx1	1.04	0.609431	0.999395	0	1.04	0.62839	0.988335	0	-1.03	0.75614	0.943215	0	-1.14	0.1272	0.583802	0	-1.28	0.004827	0.080164	0	-1.35	0.00065	0.013039	0	-1.45	3.9e-05	0.001353	0	-1.41	0.000113	0.002868	0	-1.35	0.000666	0.010799	0	-1.43	6.6e-05	0.001365	0	-1.59	1e-06	3.1e-05	1	2
2	FBgn0005630	longitudinals lacking	lola	1.2	0.018922	0.957371	0	1	0.963438	0.99777	0	-1	0.954531	0.989499	0	-1.09	0.225908	0.712809	0	-1.08	0.289218	0.818726	0	-1.29	0.001103	0.019519	0	-1.42	1.6e-05	0.00064	0	-1.36	0.000132	0.003236	0	-1.18	0.045194	0.212776	0	-1.17	0.041231	0.179109	0	-1.59	0	3e-06	1	2
2	FBgn0000319	Clathrin heavy chain	Chc	-1.01	0.885042	0.999395	0	-1.07	0.410687	0.97412	0	-1.17	0.072223	0.453812	0	-1.21	0.02812	0.271095	0	-1.29	0.003731	0.065838	0	-1.27	0.006382	0.073268	0	-1.34	0.001112	0.021785	0	-1.43	8e-05	0.002154	0	-1.35	0.000825	0.012686	0	-1.41	0.000165	0.002982	0	-1.61	1e-06	2.3e-05	1	2
2	FBgn0020279	lingerer	lig	1.2	0.251185	0.999395	0	-1.19	0.277489	0.968329	0	-1.01	0.944398	0.986316	0	1	0.983729	0.997771	0	-1.14	0.403491	0.881777	0	-1.3	0.099853	0.447111	0	-1.34	0.069222	0.371548	0	-1.44	0.025051	0.172134	0	-1.21	0.234767	0.525278	0	-1.23	0.206057	0.4666	0	-1.63	0.003325	0.035305	1	2
2	FBgn0039214	CG5794	CG5794	-1.09	0.500592	0.999395	0	-1.04	0.717111	0.988335	0	-1.2	0.140861	0.576648	0	-1.1	0.459184	0.873733	0	-1.21	0.119454	0.575807	0	-1.42	0.005283	0.06395	0	-1.48	0.001867	0.032165	0	-1.38	0.010799	0.099055	0	-1.46	0.002792	0.033037	0	-1.42	0.005553	0.046789	0	-1.65	0.000115	0.00235	1	2
2	FBgn0004649	yolkless	yl	1.03	0.652375	0.999395	0	1.05	0.434341	0.974172	0	-1	0.961081	0.99089	0	-1.09	0.222763	0.708472	0	-1.13	0.077162	0.469146	0	-1.39	1e-05	0.000388	0	-1.46	1e-06	4.3e-05	0	-1.35	4.6e-05	0.001335	0	-1.33	7.6e-05	0.00172	0	-1.34	6.8e-05	0.001406	0	-1.67	0	0	1	2
2	FBgn0026755	UDP-glycosyltransferase 37b1	Ugt37b1	1.21	0.353115	0.999395	0	-1.11	0.571827	0.98476	0	-1.59	0.014708	0.206445	0	-1.3	0.154429	0.626147	0	-1.18	0.378906	0.871395	0	-1.42	0.061697	0.340569	0	-1.43	0.077657	0.397661	0	-1.53	0.024502	0.169963	0	-1.5	0.032178	0.173142	0	-1.24	0.24199	0.50988	0	-1.72	0.004413	0.043423	1	2
2	FBgn0040108			1.06	0.602614	0.999395	0	-1.19	0.107653	0.92052	0	-1.08	0.446743	0.825996	0	-1.24	0.047503	0.362792	0	-1.27	0.026924	0.253158	0	-1.29	0.017692	0.154937	0	-1.23	0.052895	0.317059	0	-1.23	0.055012	0.28105	0	-1.24	0.045803	0.214493	0	-1.21	0.072603	0.25242	0	-1.72	3e-06	9.7e-05	1	2
2	FBgn0044049	insulin-like peptide 4	Ilp4	-1.71	0.059231	0.999395	0	-1.32	0.373438	0.972321	0	1.29	0.372517	0.782226	0	-1.13	0.697526	0.950305	0	-1.43	0.425052	0.891418	0	-1.15	0.747922	0.940126	0	-1.59	0.138168	0.525958	0	-1.46	0.387772	0.728384	0	-1.2	0.554979	0.79166	0	1.28	0.491367	0.73179	0	-2.98	0.004253	0.042097	1	2
3	FBgn0040705	CG15434	CG15434	1.16	0.47497	0.999395	0	-1.09	0.704527	0.988335	0	-1.08	0.714517	0.927362	0	-1.88	0.004116	0.084012	0	-1.81	0.013607	0.163791	0	-1.73	0.021209	0.175565	0	-1.29	0.237194	0.666327	0	-1.5	0.061502	0.301434	0	-1.6	0.029753	0.164743	0	-1.91	0.016876	0.101065	0	-2.22	0.003659	0.037724	1	3
4	FBgn0039285			1.25	0.284211	0.999395	0	1.14	0.586366	0.986792	0	-1.04	0.935325	0.986316	0	1.16	0.443438	0.86337	0	1.04	0.862902	0.986027	0	-1.08	0.866528	0.97112	0	1.18	0.413953	0.808648	0	-1.12	0.576423	0.839566	0	1.22	0.334828	0.628275	0	-1.17	0.631288	0.824878	0	2.16	0.002242	0.026575	1	4
4	FBgn0039577	CG12516	CG12516	1.29	0.071756	0.999395	0	1.11	0.471866	0.978931	0	1.06	0.657077	0.90963	0	1.15	0.319288	0.793609	0	1.22	0.151776	0.640067	0	1.04	0.791321	0.952799	0	1.27	0.094176	0.437912	0	1.19	0.220565	0.569388	0	-1.06	0.657305	0.849417	0	-1.01	0.947685	0.981485	0	1.73	0.000239	0.004219	1	4
4	FBgn0034091	mrj	mrj	-1.28	0.149121	0.999395	0	-1.46	0.031177	0.647478	0	1.48	0.024529	0.272401	0	1.42	0.044408	0.352715	0	1.24	0.216636	0.739893	0	1.05	0.778869	0.949079	0	1.12	0.542415	0.881006	0	1.32	0.147556	0.470439	0	1.07	0.729152	0.887833	0	1.09	0.658265	0.840859	0	1.67	0.003966	0.040006	1	4
4	FBgn0023001	melted	melt	-1.22	0.262965	0.999395	0	1.2	0.204563	0.957756	0	-1.11	0.513608	0.856013	0	-1.08	0.618793	0.929819	0	-1.17	0.278026	0.812407	0	1.18	0.248192	0.684534	0	1.41	0.10077	0.452244	0	-1.06	0.716973	0.900842	0	1	0.983595	0.994539	0	1.09	0.545107	0.771978	0	1.65	0.002827	0.031522	1	4
4	FBgn0033412	CG13955	CG13955	1.24	0.163942	0.999395	0	1.08	0.58567	0.986792	0	1.28	0.077657	0.466544	0	1.04	0.782503	0.966768	0	1.1	0.489118	0.911535	0	-1.17	0.265792	0.699912	0	1.18	0.230624	0.656901	0	1.06	0.64964	0.873746	0	1.03	0.80729	0.925746	0	1.25	0.107349	0.320123	0	1.63	0.001911	0.023325	1	4
4	FBgn0028878	CG15269	CG15269	1.17	0.349401	0.999395	0	-1.02	0.916955	0.997504	0	-1.01	0.973124	0.99469	0	1.34	0.129485	0.589365	0	1.04	0.802648	0.979089	0	1.07	0.669204	0.916092	0	-1	0.994211	0.998615	0	1.17	0.362307	0.707971	0	1.2	0.285587	0.581212	0	1.1	0.565128	0.784022	0	1.61	0.003261	0.034797	1	4
4	FBgn0004635	rhomboid	rho	-1.21	0.195235	0.999395	0	-1.08	0.609998	0.988335	0	1.04	0.773836	0.946597	0	1.16	0.311264	0.789274	0	1.17	0.281479	0.814508	0	1.04	0.810721	0.955648	0	1.23	0.166188	0.571415	0	1.41	0.024091	0.167819	0	1.14	0.366161	0.655789	0	1.23	0.171087	0.419605	0	1.58	0.003187	0.034376	1	4
4	FBgn0003747	Trehalose-sensitivity	Tre	1.04	0.806792	0.999395	0	-1.03	0.837084	0.995254	0	1.06	0.69949	0.923309	0	1.27	0.11904	0.568042	0	-1.15	0.36783	0.866715	0	1.06	0.688099	0.922401	0	-1	0.99334	0.998615	0	-1.05	0.732351	0.907585	0	1.34	0.05394	0.236426	0	-1.15	0.357851	0.623652	0	1.56	0.004629	0.045005	1	4
4	FBgn0005616	male-specific lethal 2	msl-2	1.09	0.486507	0.999395	0	-1.08	0.54772	0.984159	0	1.13	0.328161	0.757852	0	1.13	0.339573	0.804894	0	1.24	0.101485	0.539756	0	1.24	0.101046	0.450712	0	1.21	0.134683	0.519594	0	1.12	0.378037	0.720815	0	1.37	0.017835	0.119127	0	1.3	0.046564	0.193069	0	1.53	0.00168	0.020935	1	4
5	FBgn0042627	v(2)k05816	v(2)k05816	-1.2	0.442654	0.999395	0	1.3	0.267243	0.964139	0	1.93	0.007025	0.133439	0	1.81	0.014572	0.185433	0	1.45	0.117211	0.570419	0	1.53	0.076244	0.385768	0	1.74	0.021484	0.179534	0	1.66	0.036269	0.217496	0	1.89	0.009059	0.076188	0	1.3	0.275606	0.546184	0	2.16	0.001817	0.022278	1	5
5	FBgn0031888	PDGF- and VEGF-related factor 2	Pvf2	-1.04	0.843669	0.999395	0	1.22	0.421234	0.97412	0	1.45	0.093509	0.499463	0	1.79	0.010323	0.148469	0	1.7	0.022373	0.222627	0	1.62	0.060374	0.336706	0	1.78	0.005026	0.065495	0	3.23	0.009804	0.093317	0	1.83	0.008298	0.072521	0	1.44	0.259478	0.527504	0	1.96	0.001312	0.017227	1	5
6	FBgn0015371	charlatan	chn	1.12	0.421118	0.999395	0	1.02	0.884767	0.997504	0	1.07	0.617883	0.895526	0	1.14	0.343461	0.808458	0	-1.01	0.968268	0.994815	0	-1.24	0.110893	0.469767	0	-1.36	0.025805	0.202752	0	-1.28	0.06844	0.320159	0	-1.11	0.436582	0.709331	0	-1.19	0.208219	0.469278	0	-1.51	0.003249	0.034717	1	6
6	FBgn0038769	CG10889	CG10889	1.02	0.873018	0.999395	0	-1.03	0.750863	0.989815	0	1.03	0.752901	0.941335	0	1.04	0.730083	0.956537	0	-1.15	0.192456	0.70635	0	-1.36	0.004852	0.060166	0	-1.46	0.000556	0.012339	0	-1.38	0.003031	0.039364	0	-1.4	0.001794	0.023484	0	-1.49	0.00028	0.004591	0	-1.52	0.000174	0.003268	1	6
6	FBgn0027794	CG14786	CG14786	1.26	0.028766	0.964922	0	1.06	0.564037	0.984159	0	1.12	0.262702	0.709662	0	-1	0.986573	0.997961	0	-1.03	0.807334	0.980452	0	-1.08	0.448754	0.828499	0	-1.09	0.390825	0.794303	0	-1.15	0.1762	0.515587	0	-1.17	0.125271	0.375357	0	-1.36	0.004534	0.040322	0	-1.52	0.000144	0.002801	1	6
6	FBgn0052834	CG32834	CG32834	1.04	0.669546	0.999395	0	-1.14	0.196768	0.957756	0	-1.12	0.269517	0.715661	0	-1.13	0.219924	0.706822	0	-1.37	0.002667	0.051027	0	1.05	0.598991	0.891646	0	1.01	0.923657	0.984213	0	-1.42	0.00097	0.016453	0	-1.43	0.000749	0.011792	0	-1.49	0.000227	0.003889	0	-1.52	0.000109	0.002262	1	6
6	FBgn0003885	alpha-Tubulin at 84D	alphaTub84D	1.21	0.004368	0.670117	0	1.17	0.021153	0.583576	0	1.14	0.045183	0.368027	0	1.03	0.690145	0.94757	0	-1.01	0.864662	0.986027	0	-1.09	0.210405	0.638565	0	-1.17	0.02201	0.182885	0	-1.18	0.016261	0.130737	0	-1.24	0.00172	0.022773	0	-1.38	9e-06	0.000235	0	-1.54	0	1e-06	1	6
6	FBgn0038277	Ribosomal protein S5b	RpS5b	-1.17	0.1765	0.999395	0	-1.08	0.453255	0.977361	0	1.04	0.736041	0.934593	0	1.17	0.172342	0.652031	0	-1.08	0.448776	0.89953	0	-1.1	0.383602	0.796595	0	-1.2	0.090499	0.429089	0	-1.2	0.08748	0.364015	0	-1.36	0.004805	0.049503	0	-1.39	0.002705	0.027335	0	-1.56	0.000301	0.005114	1	6
6	FBgn0010355	TBP-associated factor 1	Taf1	1.2	0.090238	0.999395	0	1.05	0.618262	0.988335	0	1.19	0.099594	0.509798	0	-1.16	0.156956	0.630379	0	-1.24	0.039145	0.319601	0	-1.25	0.037901	0.253798	0	-1.43	0.001142	0.022237	0	-1.47	0.000488	0.009552	0	-1.31	0.011347	0.087897	0	-1.42	0.001285	0.015584	0	-1.57	5.1e-05	0.001192	1	6
6	FBgn0035851	Mediator complex subunit 24	MED24	1.08	0.460563	0.999395	0	1.06	0.595257	0.988335	0	1.04	0.696987	0.921909	0	-1.02	0.873805	0.983753	0	-1.09	0.433452	0.893166	0	-1.35	0.006297	0.072804	0	-1.21	0.071254	0.377982	0	-1.26	0.030415	0.195312	0	-1.09	0.427468	0.70212	0	-1.24	0.044336	0.187273	0	-1.58	0.000215	0.003881	1	6
6	FBgn0040752	Prosap	Prosap	1	0.993125	0.999703	0	1.04	0.710487	0.988335	0	1.01	0.88555	0.979517	0	-1.11	0.317608	0.792925	0	-1.07	0.473749	0.905544	0	-1.33	0.00557	0.066655	0	-1.25	0.027458	0.211567	0	-1.25	0.028631	0.187519	0	-1.11	0.28076	0.576108	0	-1.22	0.054909	0.213733	0	-1.58	2.5e-05	0.000636	1	6
6	FBgn0036219	CG14127	CG14127	-1.05	0.695212	0.999395	0	1.05	0.686848	0.988335	0	1.03	0.815204	0.959473	0	-1.13	0.40122	0.840502	0	-1.5	0.006387	0.098769	0	-1.27	0.072854	0.376676	0	-1.03	0.806858	0.961991	0	-1.37	0.053169	0.276358	0	-1.49	0.007316	0.066922	0	-1.28	0.128012	0.355003	0	-1.6	0.004529	0.044328	1	6
6	FBgn0035434	drosomycin-5	dro5	-1.16	0.38609	0.999395	0	1.48	0.022088	0.586776	0	1.62	0.005148	0.109853	0	1.19	0.29052	0.771194	0	1.04	0.799434	0.97836	0	1.14	0.450504	0.830092	0	1.17	0.359044	0.772737	0	1.03	0.859392	0.959053	0	-1.12	0.488235	0.746348	0	-1.57	0.008689	0.064494	0	-1.63	0.004889	0.046917	1	6
6	FBgn0031929	CG18585	CG18585	1.1	0.526438	0.999395	0	-1.16	0.34187	0.969629	0	1.12	0.461176	0.834175	0	-1.33	0.076907	0.4685	0	-1.05	0.76038	0.974782	0	1.5	0.012165	0.119044	0	1.08	0.613432	0.906201	0	-1.2	0.247346	0.599871	0	-1.34	0.063793	0.258561	0	-1.27	0.136107	0.368587	0	-1.64	0.002536	0.028983	1	6
6	FBgn0034267	CG4984	CG4984	1.19	0.136679	0.999395	0	1.05	0.684033	0.988335	0	-1.01	0.908825	0.984136	0	-1.01	0.947007	0.995122	0	1.03	0.794379	0.97736	0	1.06	0.621806	0.899578	0	-1.11	0.366411	0.778105	0	-1.01	0.960979	0.987865	0	-1.07	0.578154	0.806552	0	-1.17	0.174992	0.424639	0	-1.65	0.000227	0.004053	1	6
6	FBgn0033883	CG16935	CG16935	1.12	0.357427	0.999395	0	1.15	0.251045	0.964139	0	1.01	0.956685	0.990101	0	-1.07	0.562285	0.913401	0	-1.15	0.256837	0.788629	0	-1.11	0.383761	0.796673	0	-1.12	0.342914	0.76418	0	-1.12	0.368295	0.711997	0	-1.35	0.018554	0.122249	0	-1.4	0.00784	0.059564	0	-1.66	0.000111	0.00229	1	6
6	FBgn0032555			1.27	0.086409	0.999395	0	1.27	0.088061	0.898731	0	-1.17	0.241892	0.688352	0	-1.44	0.009106	0.138383	0	-1.29	0.065461	0.429812	0	-1.28	0.073116	0.37709	0	-1.25	0.106258	0.464653	0	-1.08	0.584211	0.842584	0	-1.21	0.168206	0.438965	0	-1.49	0.009749	0.069346	0	-1.69	0.000844	0.011954	1	6
6	FBgn0034120	CG15710	CG15710	-1.09	0.698068	0.999395	0	-1.21	0.402841	0.97412	0	-1.19	0.447868	0.825996	0	1.07	0.787324	0.968119	0	1.04	0.86819	0.987318	0	1.02	0.931491	0.985591	0	-1.16	0.557377	0.885945	0	-1.32	0.229487	0.580123	0	-1.52	0.100088	0.332405	0	-1.21	0.405951	0.665932	0	-2.09	0.002217	0.026369	1	6
7	FBgn0042627	v(2)k05816	v(2)k05816	-1.05	0.82285	0.999395	0	1.2	0.376211	0.97412	0	1.69	0.0128	0.193178	0	1.84	0.004239	0.085735	0	1.37	0.131733	0.604434	0	1.59	0.026633	0.204729	0	1.62	0.022559	0.185686	0	1.49	0.056441	0.285791	0	1.8	0.005936	0.05788	0	1.2	0.368554	0.633834	0	2.68	1.1e-05	0.000322	1	7
7	FBgn0042627	v(2)k05816	v(2)k05816	-1.09	0.68283	0.999395	0	1.2	0.389132	0.97412	0	1.57	0.033839	0.32186	0	1.78	0.007436	0.122234	0	1.4	0.113849	0.567004	0	1.49	0.060678	0.337513	0	1.52	0.049236	0.304976	0	1.61	0.026673	0.178885	0	1.81	0.005844	0.057035	0	1.22	0.348418	0.615714	0	2.64	1.9e-05	0.000513	1	7
7	FBgn0030830	CG5172	CG5172	-1.12	0.613187	0.999395	0	1.42	0.106371	0.92052	0	-1.04	0.900982	0.983836	0	1.41	0.266104	0.752407	0	1.17	0.449969	0.900209	0	1.17	0.472393	0.838483	0	1.78	0.010816	0.114566	0	-1.12	0.801713	0.93735	0	1.45	0.089685	0.311831	0	1.27	0.261178	0.529458	0	2.08	0.000558	0.008435	1	7
7	FBgn0051035			1.14	0.609297	0.999395	0	-1.01	0.97373	0.998221	0	1.11	0.650219	0.90701	0	1.66	0.10395	0.538105	0	-1.1	0.792689	0.977059	0	1.15	0.552406	0.871941	0	2.03	0.004892	0.064498	0	1.5	0.283761	0.639171	0	1.43	0.244446	0.537681	0	1.81	0.016391	0.099014	0	1.95	0.003717	0.038199	1	7
7	FBgn0040299	Myo28B1	Myo28B1	1.1	0.653303	0.999395	0	1.48	0.053732	0.787326	0	1.15	0.531914	0.862395	0	1.54	0.054341	0.389905	0	1.75	0.012896	0.158133	0	1.64	0.016843	0.150203	0	1.29	0.242054	0.671692	0	1.65	0.014783	0.123594	0	1.92	0.024867	0.146583	0	1.03	0.885862	0.955761	0	1.91	0.002091	0.025199	1	7
7	FBgn0037563	CG11672	CG11672	1.36	0.146817	0.999395	0	-1.05	0.807809	0.994329	0	1.09	0.67736	0.915115	0	1.13	0.573326	0.918398	0	-1.08	0.713816	0.965742	0	1.85	0.00442	0.056083	0	1.65	0.0193	0.167567	0	1.67	0.017303	0.136812	0	1.17	0.448581	0.717974	0	1.23	0.325553	0.593535	0	1.9	0.00324	0.034683	1	7
7	FBgn0033592	CG13215	CG13215	1.04	0.708198	0.999395	0	1.21	0.058191	0.808578	0	1.16	0.1529	0.587968	0	1.15	0.173338	0.653621	0	1.15	0.17444	0.680193	0	1.19	0.084881	0.408407	0	1.1	0.347365	0.766491	0	1.38	0.004503	0.052572	0	1.31	0.008586	0.073622	0	1.24	0.032569	0.153447	0	1.79	0	1.3e-05	1	7
7	FBgn0052985	CG32985	CG32985	1.02	0.91433	0.999395	0	-1.14	0.478455	0.979862	0	1.38	0.079538	0.470054	0	1.23	0.305363	0.785101	0	1.16	0.413491	0.883642	0	1.59	0.0239	0.190143	0	1.09	0.651278	0.917893	0	1.46	0.040081	0.232203	0	1.21	0.336847	0.630374	0	1.24	0.235844	0.502948	0	1.73	0.003758	0.038407	1	7
7	FBgn0030998	CG14195	CG14195	1.14	0.501761	0.999395	0	-1.27	0.14429	0.946789	0	-1.09	0.673906	0.91485	0	-1.06	0.749763	0.960717	0	1.05	0.769166	0.975707	0	1.37	0.07449	0.381234	0	1.2	0.295147	0.727763	0	1.39	0.068344	0.320159	0	1.45	0.023339	0.140897	0	1.55	0.015299	0.095091	0	1.71	0.003562	0.036956	1	7
7	FBgn0037504	CG1142	CG1142	-1.05	0.741399	0.999395	0	1.03	0.808101	0.994329	0	1.09	0.52417	0.860632	0	1.38	0.040422	0.336722	0	1.12	0.408004	0.882475	0	1.45	0.009525	0.098747	0	1.42	0.015285	0.144752	0	1.09	0.569202	0.835503	0	1.52	0.007732	0.069712	0	1.38	0.024393	0.12785	0	1.69	0.000383	0.006154	1	7
7	FBgn0033928	Arc2	Arc2	-1.13	0.419722	0.999395	0	1.11	0.510478	0.981307	0	1.25	0.147408	0.581361	0	1.2	0.239127	0.727797	0	1.31	0.083544	0.490043	0	1.38	0.042757	0.272173	0	1.29	0.103257	0.458023	0	1.38	0.043487	0.245143	0	1.17	0.308445	0.602974	0	1.2	0.250488	0.517117	0	1.59	0.003883	0.039275	1	7
7	FBgn0039807	CG15546	CG15546	-1.19	0.302592	0.999395	0	-1.06	0.745884	0.989815	0	1.34	0.088945	0.492202	0	-1.27	0.164834	0.641156	0	-1.01	0.956872	0.993624	0	1.51	0.020777	0.173063	0	1.47	0.017246	0.156775	0	1.56	0.023157	0.164183	0	1.07	0.656004	0.848737	0	1.4	0.035093	0.161013	0	1.57	0.005239	0.049294	1	7
7	FBgn0031775	CG9150	CG9150	1.16	0.363226	0.999395	0	1.07	0.681257	0.988335	0	1.22	0.188444	0.632826	0	-1.06	0.700039	0.950305	0	1.09	0.577333	0.935422	0	1.32	0.096615	0.438688	0	1.23	0.170828	0.578519	0	1.46	0.01396	0.119543	0	1.3	0.089157	0.310832	0	1.17	0.291037	0.561197	0	1.56	0.004641	0.045055	1	7
7	FBgn0052537	CG32537	CG32537	1.05	0.719875	0.999395	0	1.26	0.112707	0.921613	0	1.3	0.070547	0.449983	0	1.26	0.112318	0.554838	0	1.36	0.038303	0.314684	0	1.18	0.265169	0.699649	0	1	0.975782	0.995755	0	1.4	0.022051	0.159117	0	1.4	0.023186	0.14032	0	1.3	0.069966	0.2473	0	1.55	0.003416	0.035955	1	7
7	FBgn0032145	CG13121	CG13121	1.01	0.935162	0.999703	0	1.13	0.379649	0.97412	0	1.23	0.136125	0.569235	0	1.22	0.166522	0.644359	0	1.22	0.158518	0.653491	0	1.36	0.030556	0.224052	0	1.24	0.133829	0.51878	0	1.26	0.106444	0.399773	0	1.18	0.249525	0.543695	0	1.12	0.40177	0.661398	0	1.54	0.003039	0.033263	1	7
3	FBgn0037684	CG8129	CG8129	1.15	0.318143	0.999395	0	-1.31	0.050112	0.769303	0	-1.88	2.3e-05	0.002235	1	-1.95	8e-06	0.000676	1	-1.69	0.000316	0.009309	1	-1.71	0.000246	0.005827	1	-1.54	0.00252	0.039813	1	-1.54	0.002475	0.033959	1	-1.95	9e-06	0.000275	1	-2.13	1e-06	3.2e-05	1	-1.49	0.004747	0.045815	0	3
3	FBgn0004117	Tropomyosin 2	Tm2	1.03	0.764088	0.999395	0	-1.66	2e-06	0.001301	1	-1.43	0.000398	0.020223	0	-1.4	0.000917	0.027972	0	-1.45	0.00027	0.008212	0	-1.67	2e-06	8.1e-05	1	-1.65	2e-06	0.000111	1	-1.53	4.4e-05	0.001295	1	-1.73	0	1.7e-05	1	-1.66	2e-06	6.9e-05	1	-1.43	0.000465	0.007245	0	3
3	FBgn0000044	Actin 57B	Act57B	1.11	0.234552	0.999395	0	-1.28	0.006438	0.337138	0	-1.34	0.001375	0.046931	0	-1.41	0.000221	0.009278	0	-1.38	0.000458	0.012419	0	-1.53	8e-06	0.00032	1	-1.52	1e-05	0.000407	1	-1.52	1.1e-05	0.000385	1	-1.59	2e-06	6.3e-05	1	-1.53	9e-06	0.000257	1	-1.4	0.000313	0.005235	0	3
5	FBgn0053460	CG33460	CG33460	1.26	0.20603	0.999395	0	1.22	0.269238	0.964139	0	1.23	0.256472	0.703167	0	1.57	0.01366	0.177435	0	1.28	0.175285	0.680193	0	2.32	1.5e-05	0.000559	1	2.27	2.4e-05	0.000906	1	2.19	4.8e-05	0.00139	1	1.86	0.001004	0.014756	1	1.68	0.005083	0.0437	1	1.63	0.008159	0.068876	0	5
3	FBgn0026439	Excitatory amino acid transporter 1	Eaat1	1.16	0.332655	0.999395	0	-1.49	0.0104	0.411616	0	-1.58	0.003879	0.093041	0	-1.86	0.000138	0.006542	1	-2.15	5e-06	0.000279	1	-1.4	0.030248	0.222873	0	-1.62	0.002238	0.036553	1	-1.78	0.000329	0.006799	1	-1.82	0.000229	0.004436	1	-1.9	8.7e-05	0.001733	1	-1.52	0.008052	0.068319	0	3
3	FBgn0040827	CG13315	CG13315	-1.07	0.626054	0.999395	0	-1.11	0.485808	0.979862	0	-1.39	0.030628	0.307798	0	-1.67	0.002426	0.057677	0	-1.86	9.5e-05	0.003523	1	-1.52	0.005886	0.069582	0	-1.62	0.00192	0.032871	1	-1.83	0.00014	0.003365	1	-1.91	5.1e-05	0.001247	1	-2.25	1e-06	3.4e-05	1	-1.47	0.010975	0.085905	0	3
3	FBgn0033464	CG1441	CG1441	1.05	0.704527	0.999395	0	-1.24	0.096974	0.912732	0	-1.71	9e-05	0.006717	1	-1.24	0.09918	0.527264	0	-1.33	0.028318	0.260307	0	-1.44	0.006068	0.071022	0	-1.57	0.000862	0.017682	1	-1.63	0.000318	0.006601	1	-1.72	8.7e-05	0.001905	1	-1.63	0.000319	0.005061	1	-1.48	0.003153	0.034138	0	3
3	FBgn0004580	Calbindin 53E	Cbp53E	-1.03	0.772803	0.999395	0	-1.41	0.002497	0.204189	0	-1.56	0.000143	0.009358	1	-1.66	1.9e-05	0.001376	1	-1.56	0.000139	0.00476	1	-1.67	1.7e-05	0.000607	1	-1.36	0.006355	0.077997	0	-1.81	1e-06	5.5e-05	1	-1.58	8.5e-05	0.001887	1	-1.54	0.000199	0.003458	1	-1.45	0.001116	0.015031	0	3
1	FBgn0036109	Cuticular protein 67Fa2	Cpr67Fa2	-1.8	0.022868	0.957371	0	1.29	0.302674	0.968665	0	-2.12	0.004168	0.096979	0	-2.07	0.005531	0.10168	0	-2.28	0.000748	0.01868	1	-3.73	0.000194	0.004817	1	-2.12	0.009484	0.103455	0	-3.95	0.001674	0.025422	1	-3.45	3e-06	9.7e-05	1	-2.15	0.003592	0.033872	1	-3.35	0.038078	0.21022	0	1
3	FBgn0043044			-1.03	0.732726	0.999395	0	-1.33	0.005838	0.322434	0	-1.6	1.4e-05	0.001492	1	-1.56	3.2e-05	0.002081	1	-1.65	4e-06	0.00026	1	-1.26	0.021022	0.17434	0	-1.44	0.000515	0.011694	0	-1.51	0.0001	0.002583	1	-1.56	3.4e-05	0.000883	1	-1.55	3.7e-05	0.000848	1	-1.45	0.00043	0.00678	0	3
1	FBgn0038294	Myofilin	Mf	-1.15	0.165305	0.999395	0	-1.42	0.001159	0.135984	0	-1.37	0.003159	0.081579	0	-1.5	0.000199	0.008624	1	-1.33	0.006908	0.104139	0	-1.45	0.000643	0.01298	0	-1.45	0.000559	0.012386	0	-1.58	4e-05	0.001203	1	-1.66	7e-06	0.000236	1	-1.76	1e-06	3.4e-05	1	-1.38	0.002791	0.031298	0	1
1	FBgn0035734	CG14823	CG14823	-1.23	0.171081	0.999395	0	-1.39	0.030138	0.642444	0	-2.12	5e-06	0.00068	1	-1.27	0.114455	0.56	0	-1.51	0.007389	0.109031	0	-1.4	0.026004	0.201313	0	-1.37	0.038169	0.26214	0	-1.73	0.00048	0.00946	1	-1.69	0.000791	0.012254	1	-2.44	1e-06	3.6e-05	1	-1.43	0.030976	0.182345	0	1
3	FBgn0052154	CG32154	CG32154	-1.13	0.31312	0.999395	0	1.06	0.628819	0.988335	0	-1.12	0.404204	0.800152	0	-1.32	0.022624	0.240613	0	-1.24	0.075996	0.464855	0	-1.37	0.011191	0.111979	0	-1.47	0.002188	0.035999	0	-1.83	5e-06	0.00021	1	-1.73	2.8e-05	0.000751	1	-1.53	0.000755	0.010088	1	-1.44	0.003677	0.037853	0	3
3	FBgn0039474	CG6283	CG6283	1.09	0.551501	0.999395	0	-1.13	0.41006	0.97412	0	-1.02	0.875748	0.977224	0	-1.22	0.175981	0.656818	0	-1.43	0.015164	0.177652	0	-1.11	0.464932	0.834985	0	-1.34	0.042366	0.279592	0	-1.72	0.000326	0.006746	1	-1.77	0.000174	0.003517	1	-2.11	2e-06	7.7e-05	1	-1.5	0.005865	0.05406	0	3
3	FBgn0033297	CG8690	CG8690	-1.07	0.611271	0.999395	0	-1.08	0.56221	0.984159	0	-1.13	0.348364	0.769098	0	-1.49	0.002357	0.056938	0	-1.62	0.000328	0.009611	1	-1.5	0.002201	0.0333	0	-1.56	0.000911	0.018538	1	-1.41	0.008339	0.083164	0	-1.93	3e-06	9.3e-05	1	-2.07	0	1.4e-05	1	-1.3	0.042634	0.225531	0	3
2	FBgn0034655	CG10307	CG10307	-1.09	0.421001	0.999395	0	-1.22	0.080351	0.88832	0	-1.49	0.000586	0.026572	0	-1.15	0.222326	0.708472	0	-1.31	0.018676	0.20135	0	-1.36	0.014298	0.133289	0	-1.56	0.00015	0.004268	1	-1.44	0.001625	0.024977	0	-1.53	0.000288	0.005362	1	-1.69	1.3e-05	0.000338	1	-1.35	0.009047	0.074465	0	2
3	FBgn0032502	CG15639	CG15639	1	0.999571	0.999838	0	1.01	0.922505	0.997504	0	-1.19	0.095272	0.501952	0	-1.26	0.040199	0.335716	0	-1.45	0.000558	0.014725	0	-1.4	0.001515	0.025086	0	-1.55	5.3e-05	0.001775	1	-1.49	0.000212	0.004779	0	-1.51	0.000127	0.002666	1	-1.67	4e-06	0.000134	1	-1.46	0.000398	0.006309	0	3
3	FBgn0026314	UDP-glycosyltransferase 35b	Ugt35b	1.13	0.250528	0.999395	0	-1.01	0.899573	0.997504	0	-1.02	0.876252	0.9775	0	-1.59	3.1e-05	0.00203	1	-1.76	1e-06	7.7e-05	1	-1.57	4.8e-05	0.001498	1	-1.37	0.00307	0.046124	0	-1.46	0.000522	0.01008	0	-1.82	0	1.3e-05	1	-1.87	0	5e-06	1	-1.46	0.000551	0.008343	0	3
3	FBgn0036547	CG17032	CG17032	1.24	0.34743	0.999395	0	-1.05	0.82207	0.994557	0	-1.47	0.101673	0.513793	0	-1.2	0.433666	0.858557	0	-1.8	0.013767	0.165422	0	-2.27	0.000774	0.014884	1	-1.38	0.167839	0.573989	0	-1.48	0.092309	0.374432	0	-2	0.004014	0.043209	1	-2.55	0.000157	0.002866	1	-1.69	0.027487	0.169075	0	3
3	FBgn0039114	Lipid storage droplet-1	Lsd-1	1.26	0.048535	0.999395	0	1.08	0.524002	0.982072	0	-1.45	0.002101	0.062923	0	-1.53	0.000571	0.01917	1	-1.62	0.000102	0.003662	1	-1.18	0.166392	0.574883	0	-1.46	0.001881	0.032287	0	-1.3	0.027626	0.182941	0	-1.74	1.2e-05	0.00038	1	-1.74	1.4e-05	0.000355	1	-1.4	0.005157	0.048661	0	3
3	FBgn0031845	CG9232	CG9232	-1.02	0.876957	0.999395	0	-1.13	0.393038	0.97412	0	-1.46	0.009986	0.167437	0	-1.79	0.000139	0.006542	1	-1.89	3.9e-05	0.001698	1	-1.01	0.941144	0.986622	0	-1.09	0.529793	0.875725	0	-1.25	0.122686	0.430118	0	-1.57	0.002561	0.031054	1	-2.19	1e-06	3.5e-05	1	-1.5	0.006381	0.057294	0	3
2	FBgn0033188	CG1600	CG1600	-1.14	0.179925	0.999395	0	-1.48	0.000173	0.039242	0	-1.57	2.3e-05	0.002235	1	-1.43	0.000618	0.020354	0	-1.6	1.3e-05	0.000677	1	-1.24	0.029383	0.218513	0	-1.34	0.003943	0.055379	0	-1.48	0.000196	0.004452	0	-1.65	4e-06	0.000129	1	-1.57	2.4e-05	0.000596	1	-1.33	0.004978	0.047525	0	2
2	FBgn0012034	Acetyl Coenzyme A synthase	AcCoAS	1.13	0.209088	0.999395	0	-1.27	0.012603	0.450174	0	-1.61	3e-06	0.000528	1	-1.41	0.00044	0.015877	0	-1.54	2.3e-05	0.001084	1	-1.2	0.052408	0.31035	0	-1.32	0.0038	0.053891	0	-1.41	0.000435	0.008691	0	-1.52	3.2e-05	0.000851	1	-1.54	1.9e-05	0.000478	1	-1.46	0.000155	0.002967	0	2
3	FBgn0041707	7B2	7B2	1.02	0.899799	0.999395	0	-1.28	0.124893	0.929629	0	-2.13	1e-05	0.001274	1	-1.26	0.144208	0.613268	0	-1.7	0.001245	0.027985	1	-1.05	0.774853	0.9481	0	-1.04	0.79662	0.958496	0	-1.33	0.0708	0.326262	0	-1.96	6.6e-05	0.001507	1	-1.67	0.001764	0.019991	1	-1.5	0.011945	0.091825	0	3
2	FBgn0038681	Cyp12a4	Cyp12a4	-1.03	0.778315	0.999395	0	-1.26	0.027077	0.623349	0	-1.24	0.04069	0.350575	0	-1.35	0.004085	0.083771	0	-1.58	3e-05	0.001349	1	-1.11	0.304575	0.732864	0	-1.23	0.042464	0.279797	0	-1.39	0.001916	0.028081	0	-1.57	3.5e-05	0.000907	1	-1.59	2.5e-05	0.00061	1	-1.38	0.002153	0.025727	0	2
2	FBgn0024290	Slowpoke binding protein	Slob	-1.03	0.78457	0.999395	0	-1.44	0.002459	0.204189	0	-1.46	0.001775	0.057171	0	-1.33	0.017526	0.20797	0	-1.52	0.000637	0.01649	1	-1.33	0.01625	0.14651	0	-1.22	0.128857	0.511425	0	-1.43	0.003187	0.040668	0	-1.65	6.2e-05	0.001448	1	-1.59	0.000172	0.003087	1	-1.43	0.003085	0.033681	0	2
3	FBgn0038878	CG3301	CG3301	1.17	0.391657	0.999395	0	-1.03	0.861841	0.996946	0	-1.03	0.830553	0.96582	0	-1.4	0.025709	0.259506	0	-1.76	0.000278	0.008431	1	-1.11	0.476668	0.840258	0	-1.38	0.03176	0.233799	0	-1.44	0.015322	0.126754	0	-1.79	0.000191	0.003785	1	-1.73	0.001149	0.014196	1	-1.37	0.037172	0.207138	0	3
3	FBgn0028572	quick-to-court	qtc	1.03	0.765077	0.999395	0	-1.16	0.098006	0.912732	0	-1.29	0.004901	0.107375	0	-1.38	0.000512	0.01779	0	-1.63	1e-06	5.7e-05	1	-1.16	0.116932	0.483647	0	-1.33	0.001793	0.031128	0	-1.4	0.000257	0.005569	0	-1.61	1e-06	4.1e-05	1	-1.75	0	1e-06	1	-1.49	2.3e-05	0.000606	0	3
3	FBgn0050360	CG30360	CG30360	-1.07	0.628832	0.999395	0	-1.49	0.006568	0.339238	0	-1.39	0.024588	0.272546	0	-1.44	0.013037	0.173073	0	-1.82	9.3e-05	0.003487	1	-1.06	0.68567	0.921563	0	-1.15	0.32675	0.754688	0	-1.47	0.009124	0.089229	0	-1.58	0.002142	0.026921	1	-1.76	0.000199	0.003459	1	-1.5	0.006183	0.056093	0	3
6	FBgn0033446	CG1648	CG1648	1.24	0.103394	0.999395	0	-1.03	0.825943	0.994557	0	-1.27	0.076337	0.464342	0	-1.31	0.047759	0.363727	0	-1.64	0.000428	0.011699	1	1.1	0.47382	0.838724	0	1.08	0.570859	0.892437	0	-1.11	0.445671	0.765397	0	-1.59	0.000843	0.012829	1	-1.67	0.000259	0.004328	1	-1.31	0.068008	0.300393	0	6
2	FBgn0040942	CG12643	CG12643	-1	0.975739	0.999703	0	-1.13	0.297365	0.968665	0	-1.25	0.058408	0.417498	0	1.05	0.657357	0.941127	0	-1.2	0.114472	0.567184	0	-1.37	0.009204	0.096173	0	-1.19	0.140736	0.529918	0	-1.29	0.030289	0.194792	0	-1.54	0.0004	0.007048	1	-1.56	0.000277	0.004556	1	-1.3	0.026156	0.163097	0	2
2	FBgn0053503	Cyp12d1-d	Cyp12d1-d	-1.06	0.483089	0.999395	0	-1.1	0.27977	0.968329	0	-1.08	0.409191	0.802351	0	-1.31	0.003209	0.070349	0	-1.48	4.6e-05	0.00191	0	-1.4	0.000366	0.008082	0	-1.5	3e-05	0.001087	0	-1.28	0.006794	0.072021	0	-1.63	1e-06	3.7e-05	1	-1.55	7e-06	0.000198	1	-1.34	0.001569	0.019877	0	2
2	FBgn0033754	Adenylate kinase 6	Ak6	-1.14	0.368955	0.999395	0	-1.12	0.434086	0.974172	0	-1.25	0.129925	0.56295	0	-1.24	0.144447	0.61369	0	-1.25	0.128453	0.59526	0	-1.31	0.071176	0.37201	0	-1.29	0.081939	0.408297	0	-1.37	0.035259	0.213878	0	-1.57	0.002866	0.033726	1	-1.68	0.000744	0.009989	1	-1.39	0.026418	0.163649	0	2
2	FBgn0051145	CG31145	CG31145	-1.07	0.453994	0.999395	0	-1.16	0.088282	0.898731	0	-1.14	0.126538	0.557144	0	-1.12	0.221312	0.707822	0	-1.22	0.025701	0.24463	0	-1.21	0.027527	0.209159	0	-1.37	0.000464	0.010796	0	-1.4	0.000243	0.005282	0	-1.52	9e-06	0.000279	1	-1.68	0	5e-06	1	-1.4	0.000241	0.004259	0	2
2	FBgn0039856	CG1774	CG1774	-1.08	0.233349	0.999395	0	-1.17	0.016634	0.51936	0	-1.49	0	4e-05	0	-1.3	0.000613	0.02023	0	-1.47	0	2.4e-05	0	-1.47	0	1.5e-05	0	-1.46	0	2.1e-05	0	-1.4	3e-06	0.000119	0	-1.6	0	0	1	-1.56	0	0	1	-1.4	4e-06	0.000127	0	2
2	FBgn0039049	CG6726	CG6726	-1.02	0.784852	0.999395	0	-1.13	0.137338	0.940266	0	-1.18	0.038912	0.344015	0	-1.42	5.4e-05	0.00311	0	-1.43	4e-05	0.001716	0	-1.13	0.132486	0.51494	0	-1.25	0.006519	0.079521	0	-1.33	0.000681	0.012519	0	-1.55	1e-06	4.5e-05	1	-1.55	1e-06	4e-05	1	-1.4	9e-05	0.001939	0	2
2	FBgn0033093	CG3270	CG3270	-1	0.987341	0.999703	0	-1.02	0.838113	0.995427	0	-1.13	0.279575	0.723932	0	-1.48	0.000986	0.029409	0	-1.47	0.00115	0.026238	0	-1.09	0.456099	0.832901	0	-1.23	0.066344	0.362463	0	-1.38	0.006171	0.067204	0	-1.66	3.1e-05	0.000833	1	-1.55	0.000239	0.004068	1	-1.41	0.003595	0.037211	0	2
2	FBgn0004028	wings up A	wupA	-1.16	0.231356	0.999395	0	-1.27	0.051767	0.772774	0	-1.28	0.042125	0.35431	0	-1.41	0.006014	0.107207	0	-1.37	0.011201	0.143792	0	-1.22	0.108363	0.464683	0	-1.21	0.122661	0.500428	0	-1.2	0.140673	0.45925	0	-1.59	0.000314	0.005769	1	-1.63	0.000165	0.002982	1	-1.41	0.006062	0.055333	0	2
2	FBgn0029898	CG14439	CG14439	1.11	0.17096	0.999395	0	-1.09	0.288163	0.968665	0	-1.12	0.141823	0.577349	0	-1.16	0.063167	0.421586	0	-1.39	5.9e-05	0.002355	0	-1.25	0.004964	0.061265	0	-1.27	0.002461	0.039161	0	-1.37	0.00014	0.003371	0	-1.55	0	2e-05	1	-1.53	1e-06	3.1e-05	1	-1.49	3e-06	9.3e-05	0	2
3	FBgn0037835	CG14687	CG14687	-1.27	0.179643	0.999395	0	-1.06	0.727083	0.988753	0	-1.28	0.166688	0.602518	0	-1.64	0.007317	0.12114	0	-1.61	0.009603	0.130235	0	-1.31	0.133989	0.517567	0	-1.26	0.194845	0.61639	0	-1.44	0.044942	0.250536	0	-1.73	0.003235	0.036783	1	-1.96	0.00038	0.00582	1	-1.37	0.082087	0.335834	0	3
3	FBgn0034909	CG4797	CG4797	1.07	0.534271	0.999395	0	-1.3	0.017351	0.532776	0	-1.45	0.00093	0.035658	0	-1.47	0.00063	0.020704	0	-1.46	0.000749	0.01868	0	-1.18	0.120963	0.491367	0	-1.38	0.003529	0.051369	0	-1.46	0.000764	0.013828	0	-1.84	0	1.6e-05	1	-1.8	1e-06	2.7e-05	1	-1.37	0.004072	0.040718	0	3
3	FBgn0010408	Ribosomal protein S9	RpS9	-1.4	0.015596	0.932019	0	-1.26	0.09063	0.90321	0	-1.25	0.097724	0.505544	0	-1.39	0.017269	0.20731	0	-1.3	0.054074	0.385329	0	-1.36	0.023853	0.190143	0	-1.25	0.100848	0.45244	0	-1.41	0.012839	0.112588	0	-1.79	5.6e-05	0.001336	1	-1.92	9e-06	0.000242	1	-1.39	0.017205	0.120045	0	3
3	FBgn0020907	Sarcoplasmic calcium-binding protein 2	Scp2	1.31	0.035662	0.999395	0	-1.21	0.126753	0.933453	0	-1.31	0.03459	0.325389	0	-1.35	0.019511	0.220361	0	-1.46	0.003474	0.062635	0	-1.27	0.057307	0.326528	0	-1.25	0.081517	0.407273	0	-1.41	0.007722	0.078585	0	-1.64	0.000205	0.004019	1	-1.71	6.3e-05	0.001322	1	-1.46	0.003373	0.035698	0	3
3	FBgn0038774	CG5023	CG5023	-1.22	0.215512	0.999395	0	-1.17	0.33055	0.968993	0	-1.32	0.091934	0.496539	0	-1.4	0.042584	0.343203	0	-1.28	0.124812	0.586873	0	-1.22	0.21666	0.645513	0	-1.32	0.088545	0.424487	0	-1.42	0.034633	0.210961	0	-1.72	0.001314	0.018439	1	-1.91	0.000169	0.003032	1	-1.49	0.015555	0.111729	0	3
3	FBgn0031700	CG14022	CG14022	-1.37	0.020008	0.957371	0	-1.28	0.063341	0.83345	0	-1.29	0.058954	0.419803	0	-1.27	0.071049	0.447502	0	-1.46	0.00595	0.093003	0	-1.27	0.070286	0.3692	0	-1.29	0.060661	0.344596	0	-1.41	0.010957	0.100021	0	-1.74	8.9e-05	0.001958	1	-2.06	1e-06	3.5e-05	1	-1.5	0.003339	0.035399	0	3
3	FBgn0010401	Os-C	Os-C	-2.16	0.02106	0.957371	0	-1.48	0.090202	0.901661	0	1.14	0.571377	0.879246	0	-1.32	0.265501	0.751946	0	-1.21	0.499179	0.912882	0	-1.43	0.16094	0.566868	0	-1.59	0.048017	0.299851	0	-2.46	0.007582	0.07768	0	-2.03	0.003114	0.035782	1	-2.28	0.001758	0.019955	1	-1.52	0.072557	0.313326	0	3
3	FBgn0037765	CG9458	CG9458	1.15	0.401721	0.999395	0	-1.04	0.80672	0.994329	0	-1.44	0.033419	0.321056	0	-1.49	0.021307	0.231662	0	-1.68	0.003323	0.060579	0	-1.06	0.750953	0.940256	0	-1.04	0.827744	0.966289	0	-1.48	0.024243	0.168608	0	-1.74	0.001741	0.023005	1	-1.83	0.00071	0.009635	1	-1.56	0.010482	0.083148	0	3
4	FBgn0000578	enabled	ena	1.06	0.41259	0.999395	0	1.22	0.010122	0.407314	0	1.19	0.020911	0.250111	0	1.11	0.155805	0.628838	0	1.23	0.008583	0.120536	0	-1.01	0.912869	0.982769	0	1.15	0.063155	0.352448	0	1.25	0.00396	0.047537	0	1.52	1e-06	2.5e-05	1	1.62	0	1e-06	1	1.41	2.4e-05	0.00062	0	4
4	FBgn0052000	CG32000	CG32000	-1.08	0.645182	0.999395	0	-1.12	0.501501	0.981307	0	-1.05	0.745109	0.938612	0	1.2	0.270703	0.756872	0	-1.04	0.824512	0.984174	0	1.05	0.755025	0.941517	0	1.21	0.236592	0.665812	0	1.21	0.254839	0.607298	0	1.69	0.002107	0.026656	1	1.64	0.003509	0.033305	1	1.33	0.081949	0.335479	0	4
4	FBgn0037757	CG8516	CG8516	1.05	0.766177	0.999395	0	1.16	0.397163	0.97412	0	-1.01	0.931249	0.986316	0	1	0.99279	0.999325	0	1.09	0.600324	0.942365	0	1.11	0.559055	0.876524	0	1.05	0.790169	0.956991	0	1.2	0.280445	0.635376	0	1.8	0.001116	0.016132	1	1.66	0.004416	0.039544	1	1.28	0.151389	0.474036	0	4
4	FBgn0002466	sticky	sti	-1.02	0.912268	0.999395	0	1.16	0.302717	0.968665	0	1.14	0.381855	0.787617	0	1.33	0.053953	0.388822	0	1.24	0.148115	0.63193	0	-1.01	0.949063	0.987305	0	1.31	0.063241	0.352693	0	1.16	0.301676	0.655784	0	1.56	0.003157	0.036095	1	1.73	0.000338	0.005281	1	1.16	0.304046	0.658286	0	4
4	FBgn0033348	CG8247	CG8247	-1.03	0.818098	0.999395	0	1.1	0.476414	0.979862	0	1.16	0.264956	0.711644	0	1.22	0.14385	0.613134	0	1.18	0.216339	0.739761	0	1.09	0.532634	0.864013	0	1.42	0.011245	0.117592	0	1.19	0.201921	0.548229	0	1.55	0.001921	0.024783	1	1.67	0.000923	0.011947	1	1.11	0.492875	0.802098	0	4
6	FBgn0001208	Henna	Hn	-1.12	0.273266	0.999395	0	-1.18	0.120569	0.92673	0	-1.18	0.113827	0.535124	0	-1.24	0.042905	0.344734	0	-1.37	0.003863	0.067432	0	-1.1	0.386774	0.798589	0	-1.03	0.808101	0.962269	0	-1.26	0.034287	0.210117	0	-1.54	0.00014	0.00291	1	-1.83	0	1.6e-05	1	-1.21	0.076267	0.321547	0	6
6	FBgn0033327	PGRP-SC1b	PGRP-SC1b	1.1	0.372152	0.999395	0	1.06	0.58904	0.987618	0	-1.03	0.771592	0.94571	0	-1.28	0.027455	0.268856	0	-1.37	0.00591	0.092489	0	-1.24	0.056321	0.323469	0	-1.3	0.019593	0.169126	0	-1.28	0.029634	0.19189	0	-1.52	0.000329	0.005974	1	-1.5	0.000459	0.006771	1	-1.25	0.047104	0.241397	0	6
6	FBgn0030009	CG15336	CG15336	-1.04	0.620183	0.999395	0	-1.02	0.802025	0.99325	0	-1.05	0.548604	0.870584	0	-1.2	0.021195	0.231224	0	-1.25	0.004189	0.071611	0	-1.17	0.042433	0.270702	0	-1.19	0.026634	0.20753	0	-1.29	0.001347	0.021334	0	-1.6	0	4e-06	1	-1.52	1e-06	3.4e-05	1	-1.3	0.000994	0.013711	0	6
6	FBgn0037714	CG9396	CG9396	1.14	0.346836	0.999395	0	1.05	0.733546	0.988753	0	-1.01	0.940096	0.986316	0	-1.17	0.239296	0.727797	0	-1.21	0.153403	0.642082	0	-1.08	0.585071	0.886542	0	-1.05	0.692017	0.932704	0	-1.2	0.184315	0.527274	0	-1.56	0.001644	0.022011	1	-1.77	7.1e-05	0.001465	1	-1.34	0.032642	0.189977	0	6
6	FBgn0010228	HMG protein Z	HmgZ	-1.16	0.252485	0.999395	0	-1.21	0.157732	0.949455	0	-1.22	0.135844	0.569223	0	-1.32	0.035901	0.314826	0	-1.35	0.024411	0.236053	0	-1.09	0.500634	0.850299	0	-1.08	0.577812	0.89557	0	-1.31	0.042149	0.239954	0	-1.53	0.001957	0.02514	1	-1.76	6.6e-05	0.001365	1	-1.34	0.027722	0.169827	0	6
6	FBgn0030484	CG1681	CG1681	1.07	0.532409	0.999395	0	-1.07	0.533308	0.984134	0	-1.24	0.050872	0.391486	0	-1.29	0.025574	0.258795	0	-1.5	0.000512	0.013674	0	-1.05	0.634683	0.903648	0	-1.24	0.05592	0.330518	0	-1.34	0.00913	0.089229	0	-1.62	4.5e-05	0.001134	1	-1.69	1.1e-05	0.000306	1	-1.35	0.007709	0.066265	0	6
6	FBgn0032329	Arginine methyltransferase 8	Art8	-1.03	0.760883	0.999395	0	-1.04	0.718431	0.988335	0	-1.04	0.721686	0.929781	0	-1.15	0.212687	0.697202	0	-1.23	0.060406	0.411208	0	-1.21	0.078746	0.390994	0	-1.19	0.103838	0.459735	0	-1.24	0.05437	0.279288	0	-1.54	0.000189	0.003756	1	-1.56	0.00011	0.002129	1	-1.38	0.004073	0.040718	0	6
6	FBgn0031907	CG5171	CG5171	1.1	0.448253	0.999395	0	-1.05	0.703064	0.988335	0	-1.09	0.482467	0.843935	0	-1.28	0.057278	0.403393	0	-1.43	0.006454	0.099395	0	-1.11	0.409081	0.815135	0	-1.12	0.385727	0.791391	0	-1.36	0.017197	0.136259	0	-1.57	0.000686	0.011049	1	-1.8	2.1e-05	0.000513	1	-1.38	0.012629	0.095467	0	6
6	FBgn0003062	Fibrillarin	Fib	1.16	0.184491	0.999395	0	-1.01	0.954994	0.99777	0	1.03	0.801068	0.952599	0	-1.16	0.168604	0.647094	0	-1.11	0.359984	0.861931	0	-1.27	0.034946	0.242538	0	-1.31	0.016721	0.15381	0	-1.32	0.014495	0.122294	0	-1.61	5.4e-05	0.001301	1	-1.73	6e-06	0.000167	1	-1.39	0.003619	0.037394	0	6
6	FBgn0034724	CG3624	CG3624	1.04	0.720859	0.999395	0	1.01	0.965406	0.99777	0	-1.28	0.042808	0.357734	0	-1.29	0.036404	0.317542	0	-1.4	0.005769	0.090932	0	-1.06	0.604486	0.893663	0	-1.2	0.135183	0.520042	0	-1.21	0.114659	0.414065	0	-1.51	0.000903	0.013585	1	-1.56	0.000417	0.006285	1	-1.4	0.006068	0.055333	0	6
6	FBgn0015575	alpha-Esterase-7	alpha-Est7	1.06	0.563894	0.999395	0	1.07	0.494331	0.980215	0	1.13	0.220197	0.666818	0	-1.14	0.218706	0.704648	0	-1.31	0.010998	0.141312	0	-1.11	0.320168	0.748784	0	-1.1	0.376855	0.785811	0	-1.2	0.080673	0.349793	0	-1.53	0.000117	0.002482	1	-1.66	7e-06	0.000188	1	-1.41	0.001444	0.018551	0	6
6	FBgn0031033	CG14219	CG14219	1.05	0.549722	0.999395	0	1.1	0.256758	0.964139	0	-1.05	0.60396	0.891539	0	-1.14	0.144959	0.614476	0	-1.16	0.082961	0.488584	0	-1.17	0.069391	0.367059	0	-1.29	0.004384	0.059597	0	-1.29	0.004603	0.053388	0	-1.56	3e-06	0.000118	1	-1.77	0	1e-06	1	-1.42	0.00014	0.002731	0	6
6	FBgn0051121	CG31121	CG31121	1.08	0.50042	0.999395	0	1.01	0.932044	0.997504	0	-1.2	0.103114	0.515292	0	-1.07	0.564238	0.913681	0	-1.18	0.129944	0.599754	0	-1.28	0.0306	0.224052	0	-1.3	0.019011	0.166049	0	-1.34	0.009648	0.092648	0	-1.54	0.000238	0.004587	1	-1.86	1e-06	2.2e-05	1	-1.43	0.00184	0.022542	0	6
6	FBgn0037723	Spermidine Synthase	SpdS	-1.03	0.741627	0.999395	0	-1.03	0.73776	0.989139	0	-1.04	0.648232	0.906109	0	-1.11	0.266285	0.752756	0	-1.16	0.130812	0.601653	0	-1.13	0.201057	0.625832	0	-1.25	0.022827	0.187115	0	-1.34	0.003131	0.040227	0	-1.5	6.4e-05	0.001478	1	-1.7	1e-06	2.4e-05	1	-1.45	0.000242	0.004262	0	6
6	FBgn0050035	CG30035	CG30035	-1	0.964757	0.999703	0	-1.35	0.002685	0.209943	0	-1	0.979535	0.996208	0	1.03	0.725984	0.955583	0	-1.09	0.367214	0.866395	0	1.02	0.86481	0.97112	0	-1.18	0.09195	0.433999	0	-1.2	0.063113	0.305006	0	-1.56	2.4e-05	0.000676	1	-1.69	1e-06	3.6e-05	1	-1.45	0.000284	0.004873	0	6
6	FBgn0038540	CG14321	CG14321	1.02	0.841324	0.999395	0	1.08	0.41312	0.97412	0	-1.02	0.861518	0.973326	0	-1.25	0.025529	0.258795	0	-1.26	0.020273	0.210162	0	-1.34	0.004189	0.054145	0	-1.39	0.001389	0.025492	0	-1.37	0.002253	0.031574	0	-1.51	9e-05	0.001959	1	-1.56	2.9e-05	0.0007	1	-1.45	0.000345	0.005712	0	6
6	FBgn0033366	Ance-4	Ance-4	1.08	0.389542	0.999395	0	-1.12	0.215706	0.957756	0	-1.17	0.074862	0.459032	0	-1.05	0.557859	0.911772	0	-1.32	0.003086	0.057276	0	-1.14	0.151812	0.550308	0	-1.3	0.004916	0.064713	0	-1.35	0.001357	0.02144	0	-1.51	1.9e-05	0.000546	1	-1.77	0	2e-06	1	-1.46	7.1e-05	0.001587	0	6
6	FBgn0050196	CG30196	CG30196	1.15	0.294702	0.999395	0	-1.01	0.913229	0.997504	0	-1.01	0.92652	0.986316	0	-1.16	0.252781	0.742196	0	-1.1	0.472682	0.905544	0	-1.21	0.143127	0.534175	0	-1.3	0.046822	0.29491	0	-1.22	0.126899	0.436712	0	-1.55	0.001133	0.016353	1	-1.6	0.000555	0.007889	1	-1.46	0.004373	0.043096	0	6
6	FBgn0034603	Glycogenin	Glycogenin	-1.01	0.868704	0.999395	0	1.1	0.229237	0.958634	0	-1.01	0.905286	0.984014	0	-1.23	0.008966	0.138154	0	-1.35	0.000213	0.006808	0	-1.37	0.000124	0.003299	0	-1.37	0.000115	0.003425	0	-1.4	5.3e-05	0.001516	0	-1.61	0	4e-06	1	-1.55	0	1.7e-05	1	-1.47	5e-06	0.000163	0	6
6	FBgn0053958	CG33958	CG33958	1.07	0.609093	0.999395	0	1.14	0.287345	0.968665	0	-1.26	0.093709	0.499542	0	-1.32	0.049219	0.37013	0	-1.08	0.553167	0.927708	0	-1.14	0.354823	0.776578	0	-1.41	0.007473	0.087474	0	-1.35	0.09483	0.379582	0	-1.59	0.001263	0.017851	1	-1.66	0.000152	0.002792	1	-1.49	0.01124	0.087528	0	6
6	FBgn0031860	CG11236	CG11236	1.01	0.928868	0.999703	0	-1.15	0.281254	0.968329	0	-1.01	0.908536	0.984136	0	-1.46	0.004192	0.085042	0	-1.33	0.028313	0.260307	0	1.01	0.955856	0.989166	0	-1.14	0.312725	0.741615	0	-1.32	0.03062	0.196247	0	-1.56	0.00089	0.013448	1	-1.73	5.5e-05	0.001187	1	-1.49	0.002332	0.027231	0	6
6	FBgn0035678	CG10469	CG10469	-1.03	0.797147	0.999395	0	1.01	0.953282	0.99777	0	-1.05	0.617714	0.895526	0	-1.09	0.421688	0.852652	0	-1.32	0.012736	0.157326	0	-1.22	0.06673	0.358696	0	-1.28	0.022309	0.184316	0	-1.45	0.001029	0.017275	0	-1.56	0.000102	0.002209	1	-1.77	2e-06	5.7e-05	1	-1.5	0.000365	0.005944	0	6
6	FBgn0015572	alpha-Esterase-4	alpha-Est4	-1.04	0.740331	0.999395	0	1.08	0.50195	0.981307	0	1.01	0.945246	0.986316	0	-1.13	0.309218	0.788435	0	-1.22	0.093853	0.516815	0	-1.33	0.01865	0.160544	0	-1.25	0.068243	0.368702	0	-1.3	0.029739	0.192193	0	-1.61	0.000176	0.003546	1	-1.83	4e-06	0.000121	1	-1.5	0.001176	0.015674	0	6
6	FBgn0001187	Hexokinase C	Hex-C	1.2	0.224204	0.999395	0	-1.01	0.939977	0.997504	0	-1.09	0.543967	0.868897	0	-1.41	0.022204	0.237483	0	-1.44	0.016072	0.18319	0	1.06	0.689088	0.922973	0	-1.05	0.72896	0.941888	0	-1.29	0.082994	0.353749	0	-1.79	0.00063	0.010422	1	-1.72	0.000459	0.006771	1	-1.51	0.006967	0.061423	0	6
6	FBgn0035670	CG10472	CG10472	1.02	0.902419	0.999395	0	-1.04	0.787308	0.99325	0	-1.11	0.492882	0.846917	0	-1.21	0.22833	0.715603	0	-1.53	0.008875	0.123254	0	1.1	0.562885	0.877912	0	-1.09	0.586798	0.897846	0	-1.19	0.276692	0.630649	0	-1.66	0.002021	0.025793	1	-2.22	4e-06	0.000126	1	-1.51	0.011369	0.08822	0	6
6	FBgn0034885	CG4019	CG4019	1.12	0.508191	0.999395	0	-1.06	0.724341	0.988625	0	-1.02	0.921367	0.986316	0	-1.16	0.39303	0.836734	0	-1.29	0.129412	0.597932	0	-1.06	0.747998	0.940126	0	-1.08	0.660357	0.921931	0	-1.26	0.166761	0.501679	0	-1.65	0.004289	0.045394	1	-2.41	2e-06	7.5e-05	1	-1.56	0.010254	0.081891	0	6
6	FBgn0043535	Odorant-binding protein 57a	Obp57a	1.03	0.867426	0.999395	0	-1.02	0.905774	0.997504	0	-1.23	0.275845	0.720202	0	-1.3	0.171746	0.651733	0	-1.59	0.016599	0.186313	0	-1.02	0.902744	0.980789	0	-1.03	0.861471	0.972898	0	-1.19	0.351403	0.698422	0	-1.77	0.003538	0.039444	1	-1.99	0.000543	0.007794	1	-1.67	0.008516	0.071099	0	6
7	FBgn0031377	CG15356	CG15356	1.13	0.667734	0.999395	0	1.13	0.640189	0.988335	0	1.12	0.698927	0.923099	0	1.19	0.551748	0.909091	0	1.13	0.675448	0.959831	0	1.42	0.180349	0.595202	0	1.47	0.142173	0.531833	0	1.65	0.084732	0.356986	0	3.46	6.2e-05	0.001448	1	3.24	0.00013	0.002429	1	1.9	0.016743	0.117819	0	7
7	FBgn0035424	CG11505	CG11505	-1.01	0.972819	0.999703	0	1.18	0.353801	0.971264	0	-1.01	0.939739	0.986316	0	1.26	0.208528	0.691471	0	1.4	0.067127	0.436485	0	1.27	0.199038	0.624222	0	1.27	0.200133	0.62134	0	1.2	0.363142	0.708565	0	1.84	0.001423	0.019643	1	1.91	0.000732	0.009881	1	1.68	0.006024	0.055067	0	7
7	FBgn0027616	YT521-B	YT521-B	1.22	0.14235	0.999395	0	1.2	0.163103	0.949455	0	1.29	0.060305	0.422254	0	1.33	0.031413	0.291815	0	1.2	0.174274	0.679972	0	1.4	0.012548	0.12191	0	1.18	0.211794	0.638394	0	1.34	0.028218	0.185464	0	1.62	0.000507	0.008658	1	1.61	0.000549	0.007842	1	1.46	0.005071	0.048025	0	7
7	FBgn0053455			1.24	0.1589	0.999395	0	1.16	0.33853	0.969629	0	1.11	0.544459	0.868902	0	1.18	0.29365	0.773862	0	-1	0.983839	0.998425	0	1.13	0.419442	0.81597	0	1.08	0.601869	0.90238	0	1.28	0.109208	0.403881	0	1.97	0.000147	0.003023	1	1.81	0.00029	0.004718	1	1.46	0.016103	0.114664	0	7
7	FBgn0036576	CG5151	CG5151	1.07	0.649727	0.999395	0	1.04	0.797854	0.99325	0	1.15	0.325962	0.756357	0	1.37	0.029906	0.282459	0	1.17	0.287132	0.817766	0	1.17	0.287553	0.717381	0	1.11	0.451125	0.835416	0	1.27	0.096748	0.383155	0	1.67	0.000654	0.010701	1	1.71	0.000415	0.006269	1	1.38	0.027784	0.169835	0	7
7	FBgn0031079	john glenn	jog	1.07	0.684684	0.999395	0	1.12	0.463806	0.977997	0	1.25	0.160037	0.595439	0	1.04	0.822425	0.973769	0	1.54	0.00731	0.108209	0	1.4	0.033257	0.236051	0	1.41	0.029956	0.225398	0	1.4	0.035459	0.214402	0	1.83	0.000263	0.004961	1	1.71	0.00269	0.027239	1	1.37	0.06668	0.296542	0	7
7	FBgn0031527			-1.04	0.805877	0.999395	0	1.08	0.630871	0.988335	0	1.3	0.093635	0.499542	0	1.17	0.314761	0.792176	0	1.09	0.590074	0.939019	0	1.05	0.740066	0.938543	0	1.43	0.023652	0.191325	0	1.26	0.164313	0.4979	0	1.58	0.003964	0.04281	1	1.63	0.002144	0.023175	1	1.35	0.051977	0.255895	0	7
7	FBgn0015625	Cyclin B3	CycB3	1.02	0.850977	0.999395	0	1.23	0.099916	0.912799	0	1.21	0.129536	0.562868	0	1.3	0.040018	0.335225	0	1.31	0.031286	0.276754	0	1.11	0.390856	0.801529	0	1.3	0.039483	0.268355	0	1.31	0.033659	0.208345	0	1.51	0.001443	0.01986	1	1.59	0.000426	0.00638	1	1.35	0.017898	0.123761	0	7
7	FBgn0030964	PDGF- and VEGF-related factor 1	Pvf1	1.02	0.88133	0.999395	0	-1	0.98332	0.998783	0	1.08	0.507641	0.853649	0	1.21	0.119877	0.570389	0	1.37	0.012196	0.152828	0	1.48	0.002107	0.032161	0	1.47	0.002635	0.041121	0	1.48	0.002111	0.03032	0	1.51	0.001182	0.016908	1	1.64	0.000147	0.002726	1	1.16	0.235759	0.586264	0	7
7	FBgn0040585	CG13858	CG13858	-1.04	0.66899	0.999395	0	1.1	0.284059	0.968329	0	1.03	0.713275	0.927229	0	1.19	0.047553	0.362792	0	1.4	0.00022	0.006989	0	1.62	0	3e-05	1	1.53	6e-06	0.00025	1	1.53	6e-06	0.000225	1	1.48	2.8e-05	0.000749	0	1.66	0	8e-06	1	1.45	6e-05	0.00137	0	7
7	FBgn0033140	CG12836	CG12836	-1.05	0.68371	0.999395	0	-1.03	0.781021	0.992414	0	1.29	0.022278	0.259148	0	1.43	0.001465	0.039947	0	1.43	0.001678	0.03571	0	1.76	3e-06	0.000126	1	1.51	0.000298	0.007457	1	1.54	0.000572	0.010877	1	1.47	0.000652	0.01068	0	1.87	0	1.3e-05	1	1.43	0.001619	0.020389	0	7
3	FBgn0029091	Chitin synthase 2	CS-2	-1.05	0.744439	0.999395	0	-1.26	0.139917	0.943671	0	-1.34	0.058641	0.418249	0	-1.24	0.167448	0.644769	0	-1.64	0.001895	0.039288	1	-1.52	0.008256	0.089028	0	-1.61	0.002858	0.043732	1	-1.69	0.002633	0.035537	1	-1.49	0.011901	0.090517	0	-1.99	0.000129	0.002429	1	-1.38	0.037689	0.208928	0	3
7	FBgn0030852	CG8316	CG8316	-1.03	0.800794	0.999395	0	1.05	0.687869	0.988335	0	-1.03	0.807894	0.955807	0	1.25	0.072976	0.455556	0	1.31	0.030321	0.271825	0	1.18	0.18346	0.600224	0	1.53	0.000803	0.016648	1	1.58	0.000402	0.008124	1	1.45	0.003463	0.03887	0	1.58	0.000344	0.005367	1	1.46	0.002653	0.030145	0	7
5	FBgn0003383	Shaker cognate b	Shab	-1.13	0.536168	0.999395	0	1.41	0.065033	0.842226	0	1.73	0.008693	0.15547	0	1.8	0.002372	0.056998	0	2.26	4.6e-05	0.00191	1	2.1	0.000179	0.00451	1	1.47	0.039436	0.268178	0	1.92	0.002092	0.03012	1	1.89	0.006504	0.061614	0	2.36	2.1e-05	0.000525	1	1.67	0.00738	0.064286	0	5
2	FBgn0027111	miple	miple	-1.11	0.368277	0.999395	0	-1.51	0.000926	0.116818	0	-1.49	0.001185	0.043095	0	-1.6	0.000528	0.018232	1	-1.47	0.00168	0.03571	0	-1.41	0.004956	0.061229	0	-1.43	0.003737	0.053164	0	-1.64	9.3e-05	0.00245	1	-1.43	0.00371	0.040946	0	-1.63	0.000111	0.002145	1	-1.36	0.0116	0.089537	0	2
2	FBgn0028699	Rh50	Rh50	-1.16	0.208254	0.999395	0	-1.51	0.000698	0.0997	0	-1.33	0.017367	0.22537	0	-1.34	0.014124	0.181125	0	-1.46	0.001781	0.037336	0	-1.37	0.008973	0.094667	0	-1.28	0.035737	0.252197	0	-1.56	0.000292	0.006192	1	-1.39	0.0062	0.059571	0	-1.56	0.000288	0.00469	1	-1.23	0.077942	0.325564	0	2
2	FBgn0022246	RNaseP protein p30	Rpp30	-1.21	0.08404	0.999395	0	-1.09	0.400575	0.97412	0	-1.48	0.000535	0.025189	0	-1.22	0.069139	0.44221	0	-1.47	0.000601	0.015689	0	-1.12	0.283598	0.714563	0	-1.22	0.06673	0.36324	0	-1.69	9e-06	0.000321	1	-1.2	0.100662	0.333475	0	-1.51	0.000328	0.005178	1	-1.26	0.037521	0.208549	0	2
2	FBgn0033054	CG14591	CG14591	-1.32	0.050192	0.999395	0	-1.54	0.002699	0.209943	0	-1.43	0.011496	0.18055	0	-1.08	0.58625	0.920819	0	-1.42	0.013211	0.161099	0	-1.11	0.443172	0.827765	0	-1.16	0.28394	0.717491	0	-1.55	0.002152	0.030751	1	-1.42	0.013219	0.0974	0	-1.6	0.001081	0.013525	1	-1.4	0.017336	0.120831	0	2
3	FBgn0037519	CG3014	CG3014	1.09	0.445508	0.999395	0	1.02	0.843283	0.996946	0	1.13	0.280713	0.724245	0	-1.44	0.001479	0.040105	0	-1.51	0.000357	0.010255	1	-1.59	7.6e-05	0.00222	1	-1.82	1e-06	6e-05	1	-1.46	0.001029	0.017275	0	-1.47	0.000769	0.012026	0	-1.69	1.2e-05	0.000308	1	-1.47	0.000835	0.011838	0	3
7	FBgn0050098	CG30098	CG30098	1.12	0.411925	0.999395	0	1.23	0.136023	0.940266	0	2.25	0	6.5e-05	1	2.06	2e-06	0.000245	1	1.62	0.000821	0.020206	1	1.79	8.6e-05	0.002466	1	1.43	0.011497	0.119654	0	1.39	0.020319	0.151587	0	1.45	0.008856	0.075177	0	1.75	0.000152	0.002803	1	1.44	0.010534	0.083165	0	7
2	FBgn0003380	Shaker	Sh	-1.13	0.353782	0.999395	0	-1.37	0.01776	0.539149	0	-1.08	0.565035	0.877702	0	-1.68	0.000199	0.008624	1	-1.23	0.157781	0.652007	0	-1.67	0.000796	0.015118	1	-1.35	0.023903	0.192649	0	-1.3	0.049801	0.266486	0	-1.03	0.848414	0.944427	0	-1.79	3.8e-05	0.000867	1	-1.28	0.089866	0.354422	0	2
1	FBgn0037179	CG14453	CG14453	-1.62	0.119887	0.999395	0	1.2	0.54676	0.984159	0	-2.25	0.011212	0.178866	0	-1.66	0.074855	0.462184	0	-2.28	0.010042	0.133871	0	-3.62	3.8e-05	0.001222	1	-2.09	0.020107	0.172301	0	-2.58	0.065952	0.313621	0	-1.69	0.192039	0.472371	0	-2.89	0.003941	0.036401	1	-2.38	0.034034	0.195786	0	1
2	FBgn0053516	dpr3	dpr3	-1.05	0.694117	0.999395	0	-1.04	0.780837	0.992414	0	1.1	0.451037	0.828056	0	-1.34	0.029896	0.282459	0	-1.07	0.617654	0.946277	0	-1.54	0.001607	0.026305	1	-1.49	0.003512	0.051353	0	-1.38	0.015841	0.129101	0	-1.43	0.008181	0.071998	0	-1.56	0.001285	0.015584	1	-1.42	0.009577	0.077805	0	2
3	FBgn0036436	CG4914	CG4914	1.26	0.308582	0.999395	0	1.05	0.796967	0.99325	0	-1.22	0.496442	0.848581	0	-1.21	0.349317	0.811412	0	-1.66	0.015702	0.181214	0	-1.94	0.001992	0.03091	1	-1.32	0.183102	0.600519	0	-1.06	0.774342	0.925254	0	-1.53	0.042903	0.206505	0	-2.07	0.000781	0.010399	1	-1.51	0.046906	0.240842	0	3
7	FBgn0035832	CG13681	CG13681	-1.18	0.193254	0.999395	0	-1.08	0.538648	0.984159	0	1.01	0.94527	0.986316	0	1.51	0.002339	0.056715	0	1.26	0.07708	0.469081	0	1.51	0.002024	0.031185	1	1.4	0.011515	0.119654	0	1.08	0.562952	0.832303	0	1.28	0.056306	0.242747	0	1.6	0.000593	0.008297	1	1.42	0.008445	0.070703	0	7
7	FBgn0038226			1.15	0.2506	0.999395	0	-1.08	0.514459	0.981307	0	-1	0.970167	0.993585	0	1.33	0.017914	0.210843	0	1.13	0.309964	0.833189	0	1.59	0.000214	0.005234	1	1.29	0.032149	0.235503	0	1.2	0.131546	0.444745	0	1.43	0.007201	0.066198	0	1.57	0.000304	0.004904	1	1.35	0.012689	0.09575	0	7
3	FBgn0040687	CG14645	CG14645	-1.1	0.710156	0.999395	0	-1.17	0.54676	0.984159	0	-1.65	0.056936	0.412353	0	-2.36	0.001615	0.042978	1	-3.62	3e-05	0.001357	1	-1.11	0.686283	0.921752	0	-1.31	0.29977	0.73175	0	-1.41	0.192244	0.536755	0	-1.96	0.011906	0.090517	0	-2.39	0.001368	0.016464	1	-1.45	0.160317	0.488268	0	3
3	FBgn0000592	Esterase 6	Est-6	1.44	0.045514	0.999395	0	-1.16	0.403113	0.97412	0	-1.37	0.081994	0.475083	0	-1.68	0.005047	0.096161	0	-1.82	0.001391	0.030633	1	-1.06	0.727035	0.934292	0	-1.17	0.393487	0.796332	0	-1.26	0.202998	0.54962	0	-1.45	0.040884	0.200583	0	-1.76	0.002441	0.025444	1	-1.4	0.063284	0.287318	0	3
3	FBgn0037976	Tachykinin	Tk	1.07	0.655606	0.999395	0	-1.34	0.065895	0.846181	0	-1.6	0.003381	0.085416	0	-1.53	0.007919	0.127409	0	-2.2	2.1e-05	0.001022	1	-1.34	0.064074	0.349484	0	-1.09	0.578243	0.895922	0	-1.58	0.009187	0.089606	0	-1.43	0.024692	0.14594	0	-1.92	8.4e-05	0.001686	1	-1.42	0.027529	0.169179	0	3
3	FBgn0036000	CG3434	CG3434	1.07	0.415204	0.999395	0	-1.09	0.258099	0.964139	0	-1.22	0.016767	0.221728	0	-1.45	1.9e-05	0.001368	0	-1.52	2e-06	0.000139	1	-1.48	6e-06	0.00026	0	-1.4	8.1e-05	0.002524	0	-1.24	0.009416	0.091017	0	-1.4	8.3e-05	0.001844	0	-1.73	0	0	1	-1.46	1.4e-05	0.000403	0	3
3	FBgn0015001	iotaTrypsin	iotaTry	-1.08	0.662829	0.999395	0	-1.15	0.442349	0.974172	0	-1.31	0.138194	0.572612	0	-1.39	0.071819	0.450433	0	-1.79	0.001961	0.040342	1	-1.08	0.68383	0.920556	0	-1.34	0.107556	0.467777	0	-1.19	0.337072	0.689046	0	-1.46	0.037448	0.190181	0	-1.84	0.001148	0.014196	1	-1.55	0.017989	0.124258	0	3
6	FBgn0038717	CG17751	CG17751	1.49	0.002944	0.624502	0	1.16	0.25216	0.964139	0	1.04	0.778331	0.948229	0	-1.48	0.008255	0.13043	0	-1.69	0.000602	0.015689	1	-1.29	0.077567	0.388279	0	-1.16	0.312503	0.741357	0	-1.3	0.047146	0.258194	0	-1.26	0.114839	0.358821	0	-1.58	0.002468	0.025665	1	-1.31	0.061887	0.283651	0	6
2	FBgn0038749	CG4468	CG4468	-1.21	0.198854	0.999395	0	-1.39	0.028463	0.634064	0	-1.42	0.020692	0.248858	0	-1.88	0.00021	0.008952	1	-1.4	0.026583	0.250667	0	-1.21	0.198941	0.624222	0	-1.27	0.107986	0.468784	0	-1.23	0.156554	0.484782	0	-1.47	0.010641	0.084208	0	-1.64	0.001238	0.015124	1	-1.35	0.045821	0.237397	0	2
2	FBgn0053514	CG33514	CG33514	-1.14	0.377847	0.999395	0	-1.34	0.045599	0.750892	0	-1.68	0.000575	0.026261	1	-1.4	0.020598	0.228487	0	-1.4	0.022585	0.223559	0	-1.09	0.545259	0.869411	0	-1.23	0.183461	0.60117	0	-1.28	0.08637	0.360767	0	-1.5	0.006598	0.06217	0	-1.69	0.000535	0.007688	1	-1.42	0.016754	0.117836	0	2
4	FBgn0040333	CG13762	CG13762	-1.15	0.55568	0.999395	0	1.28	0.094372	0.908049	0	2.4	0.000474	0.023137	1	-1.15	0.328409	0.799109	0	-1.08	0.642627	0.953208	0	-1.03	0.885207	0.976752	0	-1.03	0.837059	0.968586	0	-1.38	0.168956	0.505044	0	-1.04	0.823216	0.934019	0	1.54	0.004632	0.04092	1	1.19	0.239839	0.59087	0	4
4	FBgn0028536	CG15281	CG15281	1.05	0.836457	0.999395	0	2.12	0.004883	0.294443	0	2.5	0.000741	0.030458	1	2.12	0.004774	0.092969	0	1.42	0.177724	0.684162	0	1.28	0.339336	0.764185	0	1.39	0.200558	0.621801	0	1.39	0.201984	0.548229	0	-1.19	0.493796	0.749685	0	-2.59	0.000478	0.006967	1	-1.35	0.252564	0.605278	0	4
7	FBgn0036386	CG8833	CG8833	1.15	0.371644	0.999395	0	1.14	0.389833	0.97412	0	1.74	0.00069	0.029335	1	1.16	0.328628	0.799109	0	1.33	0.071486	0.448092	0	1.27	0.127463	0.504982	0	1.22	0.2027	0.624215	0	1.21	0.228435	0.578473	0	1.34	0.06359	0.25826	0	1.57	0.004799	0.041918	1	1.32	0.073007	0.314645	0	7
1	FBgn0036600	CG13043	CG13043	-1.6	0.094498	0.999395	0	-1.03	0.918354	0.997504	0	-1.5	0.3999	0.796991	0	-1.52	0.134239	0.59614	0	-1.77	0.067409	0.436798	0	-2.64	0.006821	0.07716	0	-2.05	0.012382	0.125785	0	-2.66	0.054505	0.279542	0	-2.65	0.005778	0.05664	0	-2.26	0.004928	0.042755	1	-2.07	0.010979	0.085905	0	1
2	FBgn0033857	CG13335	CG13335	-1.5	0.014666	0.90937	0	-1.34	0.073593	0.868144	0	-1.41	0.036005	0.3318	0	-1.46	0.022665	0.240786	0	-1.39	0.045831	0.352517	0	1.15	0.403486	0.811603	0	1.03	0.842982	0.969071	0	-1.07	0.692877	0.892754	0	-1.32	0.089042	0.310548	0	-1.63	0.003715	0.034835	1	1.05	0.770027	0.926421	0	2
2	FBgn0022073	Thor	Thor	-1.23	0.093209	0.999395	0	-1.14	0.279623	0.968329	0	-1.24	0.077046	0.464999	0	-1.36	0.012949	0.172471	0	-1.32	0.025275	0.241994	0	-1.14	0.265801	0.699912	0	-1.15	0.238141	0.667741	0	-1.16	0.215671	0.563453	0	-1.38	0.009777	0.080075	0	-1.52	0.001032	0.013006	1	-1.11	0.38809	0.733725	0	2
2	FBgn0050487	CG30487	CG30487	1.21	0.161509	0.999395	0	-1.21	0.162391	0.949455	0	-1.09	0.531265	0.862395	0	-1.16	0.287933	0.76944	0	-1.25	0.108207	0.555617	0	-1.12	0.415101	0.81596	0	-1.41	0.013676	0.134813	0	-1.49	0.004703	0.054185	0	-1.44	0.009741	0.079908	0	-1.54	0.002332	0.024699	1	-1.26	0.094367	0.366455	0	2
2	FBgn0038912	CG6656	CG6656	-1.14	0.145715	0.999395	0	-1.1	0.291785	0.968665	0	-1.15	0.128645	0.561212	0	-1.25	0.013187	0.173866	0	-1.36	0.001005	0.02368	0	-1.1	0.288295	0.717698	0	-1.1	0.282362	0.715705	0	-1.36	0.00094	0.016117	0	-1.31	0.003157	0.036095	0	-1.5	2.4e-05	0.00058	1	-1.28	0.007454	0.064885	0	2
2	FBgn0035607	CG4835	CG4835	-1.1	0.50672	0.999395	0	-1.26	0.119706	0.92616	0	-1.22	0.183923	0.626323	0	-1.02	0.90324	0.988155	0	-1.33	0.054051	0.385329	0	-1.45	0.013633	0.12902	0	-1.31	0.066734	0.36324	0	-1.1	0.498637	0.798463	0	-1.46	0.011382	0.088009	0	-1.55	0.003533	0.033439	1	-1.32	0.063503	0.287842	0	2
2	FBgn0028373	innexin 3	inx3	-1.05	0.609407	0.999395	0	-1.29	0.009062	0.388145	0	-1.37	0.001229	0.044423	0	-1.23	0.028968	0.277533	0	-1.45	0.000177	0.005807	0	-1.15	0.152317	0.550794	0	-1.18	0.082544	0.409482	0	-1.32	0.004169	0.049567	0	-1.43	0.000328	0.005971	0	-1.6	5e-06	0.000148	1	-1.32	0.00468	0.04533	0	2
2	FBgn0002570	Larval visceral protein H	LvpH	-1.03	0.857223	0.999395	0	-1.38	0.030253	0.642444	0	-1.4	0.024895	0.273329	0	-1.48	0.009518	0.141889	0	-1.49	0.008193	0.116801	0	-1.05	0.755207	0.941517	0	-1.11	0.482268	0.853583	0	-1.22	0.186928	0.530504	0	-1.4	0.025057	0.147003	0	-1.89	5.5e-05	0.001188	1	-1.32	0.059904	0.27839	0	2
2	FBgn0010435	epithelial membrane protein	emp	1.27	0.039837	0.999395	0	-1.12	0.338735	0.969629	0	-1.32	0.01726	0.224853	0	-1.36	0.01742	0.207723	0	-1.41	0.003731	0.065838	0	-1.05	0.66668	0.915057	0	-1	0.985598	0.996994	0	-1.33	0.015281	0.126647	0	-1.33	0.015205	0.106826	0	-1.55	0.000328	0.005178	1	-1.34	0.013349	0.099698	0	2
2	FBgn0026385	Odorant receptor 47b	Or47b	1.06	0.466709	0.999395	0	-1.1	0.220305	0.957756	0	-1.2	0.027947	0.293656	0	-1.32	0.001044	0.030931	0	-1.43	3.8e-05	0.001677	0	-1.43	3.1e-05	0.001026	0	-1.44	2.8e-05	0.001023	0	-1.29	0.004623	0.053499	0	-1.41	6.5e-05	0.001499	0	-1.56	1e-06	2.9e-05	1	-1.36	0.000282	0.00484	0	2
2	FBgn0040636	CG13255	CG13255	-1.15	0.196136	0.999395	0	-1.14	0.226215	0.958634	0	-1.27	0.030427	0.306637	0	-1.15	0.260334	0.746909	0	-1.47	0.000792	0.019601	0	-1.14	0.24409	0.679865	0	-1.27	0.031841	0.233934	0	-1.41	0.002607	0.035292	0	-1.42	0.002118	0.026772	0	-1.79	2e-06	6e-05	1	-1.4	0.003211	0.034493	0	2
2	FBgn0053514	CG33514	CG33514	-1.1	0.434305	0.999395	0	-1.25	0.057516	0.80679	0	-1.38	0.007311	0.137495	0	-1.1	0.410061	0.844902	0	-1.45	0.00213	0.042815	0	-1.22	0.086758	0.413961	0	-1.2	0.121581	0.498745	0	-1.31	0.023325	0.16502	0	-1.39	0.0058	0.056774	0	-1.51	0.000707	0.009613	1	-1.4	0.00494	0.047226	0	2
2	FBgn0031939	CG13796	CG13796	1.14	0.425515	0.999395	0	-1.27	0.188962	0.957756	0	-1.14	0.478843	0.842849	0	-1.56	0.009221	0.139123	0	-1.47	0.022306	0.222133	0	-1.28	0.136275	0.522103	0	-1.27	0.145012	0.53572	0	-1.56	0.015979	0.12974	0	-1.32	0.122712	0.371669	0	-1.71	0.004282	0.038729	1	-1.41	0.092364	0.360915	0	2
2	FBgn0052726	CG32726	CG32726	-1.13	0.524671	0.999395	0	-1.15	0.466232	0.977997	0	-1.32	0.152139	0.587622	0	-1.66	0.010382	0.148992	0	-1.79	0.003579	0.06392	0	1.29	0.185934	0.60444	0	-1.16	0.432733	0.824029	0	-1.32	0.155238	0.482297	0	-1.55	0.041342	0.201723	0	-1.72	0.006041	0.049972	1	-1.41	0.077346	0.324	0	2
2	FBgn0053528			1.04	0.751926	0.999395	0	-1.23	0.105073	0.918452	0	-1.43	0.006219	0.123293	0	-1.24	0.088936	0.500871	0	-1.39	0.01012	0.134106	0	-1.33	0.027117	0.206757	0	-1.3	0.0426	0.280284	0	-1.45	0.004519	0.052615	0	-1.47	0.002921	0.03418	0	-1.56	0.000756	0.010088	1	-1.47	0.003231	0.034614	0	2
2	FBgn0000463	Delta	Dl	-1.03	0.79685	0.999395	0	-1.2	0.078954	0.880278	0	-1.08	0.441636	0.823358	0	-1.14	0.213045	0.697505	0	-1.21	0.067422	0.436798	0	-1.47	0.000438	0.009316	0	-1.33	0.007442	0.087372	0	-1.23	0.074249	0.334486	0	-1.34	0.006197	0.059571	0	-1.58	3.8e-05	0.000867	1	-1.48	0.000356	0.005842	0	2
2	FBgn0035791	CG8539	CG8539	-1.07	0.701405	0.999395	0	-1.13	0.466479	0.978281	0	-1.13	0.480075	0.843435	0	-1.28	0.156191	0.628838	0	-1.35	0.09019	0.507962	0	1	0.992053	0.998159	0	-1.24	0.263352	0.693609	0	-1.48	0.026534	0.178412	0	-1.35	0.084195	0.302971	0	-1.64	0.005654	0.047401	1	-1.5	0.021303	0.140506	0	2
3	FBgn0035917	Z band alternatively spliced PDZ-motif protein 66	Zasp66	-1.22	0.00949	0.822654	0	-1.34	0.000222	0.048066	0	-1.37	8.9e-05	0.006694	0	-1.28	0.001712	0.044729	0	-1.3	0.000955	0.022862	0	-1.14	0.084168	0.407262	0	-1.24	0.006127	0.076055	0	-1.37	8.3e-05	0.002209	0	-1.48	2e-06	7.7e-05	0	-1.57	0	6e-06	1	-1.27	0.002163	0.025829	0	3
3	FBgn0032008	CG14277	CG14277	1	0.998332	0.999838	0	1.14	0.4262	0.97412	0	-1.22	0.228806	0.674944	0	-1.47	0.023731	0.247771	0	-1.45	0.02788	0.258083	0	-1.47	0.022751	0.185065	0	-1.34	0.078532	0.399963	0	-1.47	0.035369	0.214152	0	-1.43	0.035738	0.184486	0	-1.65	0.0037	0.034719	1	-1.39	0.050865	0.253075	0	3
3	FBgn0035521	CG1268	CG1268	-1.33	0.200743	0.999395	0	-1.21	0.389231	0.97412	0	-1.53	0.06152	0.42607	0	-2.07	0.004318	0.08646	0	-1.61	0.057882	0.401085	0	-1.35	0.184093	0.601218	0	-1.38	0.151212	0.547117	0	-1.8	0.010847	0.099234	0	-1.87	0.012986	0.096011	0	-3.13	2e-05	0.000505	1	-1.67	0.02483	0.157222	0	3
3	FBgn0038082	CG5724	CG5724	-1.15	0.46367	0.999395	0	-1.27	0.21246	0.957756	0	-1.48	0.045338	0.368564	0	-1.33	0.140756	0.607338	0	-1.63	0.01347	0.162887	0	-1.39	0.089761	0.420833	0	-1.1	0.610203	0.905174	0	-1.21	0.364188	0.708674	0	-1.31	0.169192	0.440489	0	-2.43	2.1e-05	0.000513	1	-1.71	0.007162	0.062722	0	3
3	FBgn0035189	CG9119	CG9119	-1.37	0.12984	0.999395	0	-1.41	0.100328	0.912799	0	-1.55	0.035739	0.330576	0	-1.8	0.005925	0.106159	0	-1.47	0.06336	0.421706	0	-1.65	0.018198	0.158151	0	-1.55	0.03615	0.253437	0	-1.6	0.025582	0.174506	0	-1.81	0.010505	0.083535	0	-1.98	0.001485	0.017445	1	-1.79	0.006433	0.057717	0	3
3	FBgn0031305	Iris	Iris	1.12	0.603788	0.999395	0	1.04	0.843736	0.996946	0	-1.23	0.356593	0.773863	0	-1.5	0.069559	0.442857	0	-1.94	0.003986	0.069033	0	-1.12	0.620035	0.898662	0	-1.11	0.639677	0.91445	0	-1.18	0.453922	0.769116	0	-1.89	0.010504	0.083535	0	-2.45	0.000153	0.002809	1	-1.82	0.008811	0.072981	0	3
4	FBgn0032938	CG8671	CG8671	-1.05	0.76147	0.999395	0	1.07	0.68434	0.988335	0	1.06	0.721262	0.929781	0	1.27	0.16288	0.637983	0	1.1	0.572969	0.934799	0	1.16	0.394736	0.804606	0	1.11	0.541812	0.880619	0	1.27	0.162255	0.494286	0	1.63	0.005552	0.055142	0	1.73	0.002035	0.022315	1	1.46	0.029565	0.177456	0	4
4	FBgn0039733	CG11504	CG11504	1.05	0.582927	0.999395	0	1.15	0.099991	0.912799	0	1.08	0.382293	0.787617	0	1.21	0.026148	0.261934	0	1.22	0.020136	0.209736	0	1.21	0.027253	0.207305	0	1.21	0.02725	0.210833	0	1.31	0.002156	0.03077	0	1.32	0.001362	0.019019	0	1.53	3e-06	0.000105	1	1.4	0.000167	0.003152	0	4
4	FBgn0030421	CG3812	CG3812	-1.1	0.417514	0.999395	0	-1.1	0.401419	0.97412	0	1.26	0.041417	0.35312	0	1.14	0.254847	0.742871	0	1.32	0.016783	0.187754	0	1.11	0.360131	0.780274	0	1.11	0.336768	0.760236	0	1.24	0.059953	0.29672	0	1.32	0.015842	0.110067	0	1.56	0.000195	0.003417	1	1.39	0.004535	0.044354	0	4
4	FBgn0000158	bag of marbles	bam	-1.01	0.877549	0.999395	0	1.03	0.7238	0.98842	0	1.25	0.012521	0.190092	0	1.22	0.026697	0.265448	0	1.16	0.090727	0.509154	0	1.15	0.110301	0.468316	0	1.13	0.167855	0.573989	0	1.24	0.017804	0.139059	0	1.44	8.4e-05	0.001855	0	1.55	4e-06	0.000135	1	1.33	0.001882	0.023007	0	4
4	FBgn0028431	Glutamate receptor IB	Glu-RIB	1.24	0.280962	0.999395	0	1.21	0.294021	0.968665	0	1.01	0.95575	0.989856	0	1.41	0.055669	0.395552	0	1.38	0.075671	0.463367	0	1.19	0.330978	0.758694	0	1.12	0.540259	0.880498	0	1.31	0.164311	0.4979	0	1.09	0.621164	0.83161	0	2.01	0.00251	0.025913	1	1.29	0.151876	0.474884	0	4
4	FBgn0035702	CG10147	CG10147	1.05	0.684441	0.999395	0	1.19	0.178249	0.950325	0	1.15	0.29168	0.73132	0	1.15	0.279372	0.762357	0	1.1	0.450398	0.900209	0	1.18	0.20644	0.635963	0	1.25	0.085537	0.417439	0	1.26	0.080111	0.348815	0	1.48	0.003829	0.041665	0	1.54	0.001445	0.017116	1	1.29	0.075441	0.320513	0	4
4	FBgn0067864	Patj	Patj	1.12	0.43029	0.999395	0	1.11	0.465052	0.977997	0	1.18	0.264743	0.711644	0	1.1	0.541448	0.907699	0	1.12	0.434396	0.893689	0	1.1	0.505257	0.852909	0	1.05	0.718852	0.938977	0	1.11	0.468267	0.778786	0	1.42	0.021956	0.135183	0	1.56	0.004033	0.036982	1	1.28	0.100812	0.379879	0	4
4	FBgn0032117	FucTB	FucTB	-1.07	0.57606	0.999395	0	1.15	0.271328	0.964139	0	1.06	0.668277	0.913277	0	1.09	0.503694	0.89353	0	1.1	0.438499	0.894962	0	-1.06	0.662966	0.913921	0	1.13	0.319178	0.747795	0	1.16	0.23738	0.588747	0	1.39	0.010448	0.083339	0	1.73	4.9e-05	0.001077	1	1.26	0.066394	0.295948	0	4
4	FBgn0003520	staufen	stau	1.15	0.140991	0.999395	0	1.05	0.56119	0.984159	0	-1.04	0.667665	0.913062	0	1.08	0.403692	0.84246	0	1.16	0.10627	0.551055	0	1.27	0.011008	0.110539	0	1.08	0.390819	0.794303	0	1.1	0.321182	0.673711	0	1.32	0.004	0.043139	0	1.62	2e-06	6.9e-05	1	1.25	0.016492	0.116491	0	4
4	FBgn0011673			1.06	0.680715	0.999395	0	1.1	0.48206	0.979862	0	1.11	0.447415	0.825996	0	1.03	0.864608	0.98176	0	1.03	0.814233	0.981582	0	1.12	0.398422	0.807597	0	1.31	0.048945	0.303479	0	1.23	0.122804	0.430118	0	1.46	0.006343	0.060548	0	1.54	0.002052	0.022439	1	1.25	0.099734	0.377377	0	4
4	FBgn0041145			1.16	0.51952	0.999395	0	1.31	0.242409	0.960794	0	1.12	0.623494	0.896896	0	1.12	0.648207	0.938091	0	1.01	0.966495	0.994723	0	1.14	0.555552	0.874055	0	-1.12	0.60889	0.904902	0	1.04	0.877434	0.964642	0	1.52	0.067853	0.267252	0	1.96	0.004244	0.038475	1	1.25	0.369911	0.718726	0	4
4	FBgn0004864	hopscotch	hop	1.07	0.531573	0.999395	0	1.28	0.021268	0.583576	0	1.31	0.011939	0.184855	0	1.2	0.082994	0.485422	0	1.18	0.12144	0.579709	0	1.11	0.318866	0.747013	0	1.19	0.093619	0.43639	0	1.22	0.057689	0.289438	0	1.45	0.000703	0.011249	0	1.53	0.000136	0.00254	1	1.25	0.038689	0.212167	0	4
4	FBgn0033010	Atf6	Atf6	1.07	0.62393	0.999395	0	-1.01	0.918679	0.997504	0	1.05	0.708963	0.926872	0	1.08	0.567932	0.91563	0	1.19	0.205012	0.724584	0	1.04	0.786389	0.951438	0	1.09	0.547697	0.883431	0	1.2	0.179641	0.520387	0	1.44	0.009596	0.079383	0	1.67	0.000398	0.006038	1	1.24	0.113576	0.405803	0	4
4	FBgn0040347	mus81	mus81	-1.01	0.881515	0.999395	0	1.08	0.351538	0.971069	0	1.11	0.209571	0.657002	0	1.15	0.105492	0.5392	0	1.16	0.074939	0.461122	0	1.13	0.155107	0.555403	0	1.13	0.146448	0.538174	0	1.21	0.024734	0.171003	0	1.32	0.001474	0.020178	0	1.5	9e-06	0.000241	1	1.24	0.011824	0.091051	0	4
4	FBgn0050169	Breast cancer 2, early onset homolog	Brca2	1.1	0.653691	0.999395	0	1.17	0.457777	0.977521	0	1.26	0.265754	0.711883	0	1.22	0.345281	0.808458	0	1.19	0.411463	0.882509	0	1.07	0.728215	0.934639	0	1.05	0.832278	0.967108	0	1.18	0.436668	0.761211	0	1.58	0.030949	0.169102	0	2.2	0.000354	0.005501	1	1.22	0.335527	0.688496	0	4
4	FBgn0034674	CG9304	CG9304	1.05	0.731091	0.999395	0	-1.01	0.929335	0.997504	0	1.06	0.67943	0.916372	0	-1.06	0.688678	0.94757	0	-1.06	0.706293	0.963632	0	1	0.979663	0.995523	0	1.01	0.922891	0.984213	0	1.12	0.436752	0.761211	0	1.23	0.147865	0.408708	0	1.51	0.005211	0.044567	1	1.21	0.181865	0.515776	0	4
4	FBgn0051510	CG31510	CG31510	-1.02	0.902489	0.999395	0	1.1	0.599104	0.988335	0	1.15	0.428584	0.814005	0	1.18	0.336532	0.802626	0	1.15	0.436369	0.894759	0	1.04	0.823078	0.958993	0	1.32	0.11626	0.486518	0	1.16	0.386259	0.726689	0	1.5	0.022403	0.136907	0	1.89	0.000551	0.007852	1	1.2	0.29762	0.650949	0	4
4	FBgn0040294	Plenty of SH3s	POSH	1.13	0.483304	0.999395	0	1.13	0.473776	0.979338	0	1.06	0.738626	0.935374	0	1.06	0.725063	0.955583	0	1.07	0.6979	0.96324	0	1.04	0.825807	0.960046	0	1.08	0.649053	0.917149	0	1.06	0.745321	0.913587	0	1.44	0.040656	0.199859	0	1.66	0.005018	0.04329	1	1.2	0.298418	0.65138	0	4
4	FBgn0004584	Recombination repair protein 1	Rrp1	1.12	0.438245	0.999395	0	1.11	0.481944	0.979862	0	1.05	0.768326	0.945394	0	1.16	0.329432	0.79985	0	1.07	0.64247	0.95319	0	1.05	0.723346	0.933292	0	1.06	0.690712	0.93256	0	1.06	0.71946	0.902382	0	1.23	0.181273	0.457358	0	1.67	0.002759	0.027783	1	1.18	0.273888	0.625477	0	4
4	FBgn0034447	CG7744	CG7744	-1.01	0.949375	0.999703	0	1.03	0.78439	0.99325	0	-1.03	0.824829	0.963767	0	1.05	0.677992	0.945886	0	1.05	0.698668	0.963418	0	1.03	0.834524	0.961889	0	1.04	0.717799	0.938977	0	1.09	0.469937	0.779668	0	1.37	0.010236	0.082241	0	1.51	0.001103	0.013738	1	1.18	0.172056	0.504162	0	4
4	FBgn0035637			1.04	0.804474	0.999395	0	1.09	0.626233	0.988335	0	1.11	0.554037	0.872611	0	1.03	0.880681	0.984513	0	1.02	0.931539	0.991117	0	1.01	0.948073	0.987305	0	1.07	0.708712	0.936014	0	1.27	0.182317	0.524526	0	1.6	0.009745	0.079908	0	1.74	0.002642	0.026916	1	1.18	0.353695	0.704513	0	4
4	FBgn0036217	CG5906	CG5906	-1.2	0.181243	0.999395	0	-1.22	0.143471	0.946789	0	1.03	0.830214	0.965662	0	1.29	0.063716	0.423001	0	-1.05	0.732933	0.970525	0	1.12	0.444908	0.828041	0	-1.02	0.881595	0.975831	0	-1.07	0.619386	0.859157	0	1.01	0.940585	0.978312	0	1.5	0.003791	0.035289	1	1.17	0.256987	0.610425	0	4
4	FBgn0030248	CG15207	CG15207	1.03	0.849987	0.999395	0	1.08	0.628279	0.988335	0	1.06	0.652215	0.907855	0	1.17	0.268125	0.755408	0	1.16	0.287253	0.817766	0	-1.2	0.189256	0.60945	0	1.03	0.817941	0.965068	0	1.04	0.820108	0.943716	0	1.24	0.124655	0.374139	0	1.78	0.000109	0.002114	1	1.16	0.285678	0.638428	0	4
4	FBgn0003598	Suppressor of variegation 3-7	Su(var)3-7	1.16	0.151326	0.999395	0	1.11	0.30032	0.968665	0	1.17	0.130504	0.564488	0	1.15	0.18559	0.66948	0	1.19	0.088544	0.502979	0	1.11	0.313405	0.743258	0	1.17	0.122854	0.500438	0	1.18	0.105595	0.398522	0	1.36	0.004357	0.045929	0	1.52	0.000127	0.002394	1	1.16	0.162277	0.490248	0	4
4	FBgn0003430	sloppy paired 1	slp1	-1.32	0.110661	0.999395	0	-1.05	0.796398	0.99325	0	-1.01	0.969584	0.993426	0	1.24	0.220252	0.707251	0	1.21	0.274819	0.809211	0	1.3	0.132274	0.514724	0	1.42	0.045925	0.291634	0	1.14	0.453151	0.768568	0	1.21	0.279972	0.575319	0	1.64	0.005289	0.045149	1	1.14	0.445799	0.772912	0	4
4	FBgn0026317	Tsc1	Tsc1	-1.03	0.853782	0.999395	0	1.13	0.401237	0.97412	0	1.18	0.250869	0.698215	0	1.01	0.942069	0.994163	0	1.06	0.71028	0.965026	0	1.06	0.676143	0.918646	0	1.1	0.567025	0.890826	0	1.11	0.461092	0.773488	0	1.19	0.231784	0.52225	0	1.68	0.000602	0.008407	1	1.13	0.414611	0.752802	0	4
4	FBgn0003391	shotgun	shg	1.07	0.57603	0.999395	0	1.13	0.321373	0.968964	0	-1.05	0.708965	0.926872	0	-1.03	0.795168	0.969442	0	1.13	0.327538	0.847365	0	1.04	0.737808	0.938429	0	1.08	0.523036	0.87381	0	1.02	0.88436	0.965845	0	1.41	0.007373	0.067302	0	1.6	0.000296	0.004796	1	1.12	0.357188	0.706572	0	4
4	FBgn0033491	CG18011	CG18011	1	0.965286	0.999703	0	1.03	0.76593	0.990614	0	1.04	0.706192	0.92627	0	-1	0.979046	0.997497	0	1.03	0.813163	0.981362	0	-1.04	0.711922	0.929778	0	1.11	0.320053	0.74811	0	-1.03	0.797792	0.936064	0	1.21	0.075182	0.283505	0	1.5	0.000341	0.005325	1	1.12	0.3095	0.664109	0	4
4	FBgn0025740	plexin B	plexB	-1.15	0.54716	0.999395	0	1.08	0.738432	0.989139	0	-1.08	0.730073	0.932444	0	1.15	0.541816	0.907699	0	1.05	0.814454	0.981662	0	1.07	0.749237	0.940256	0	-1.06	0.789877	0.956991	0	1.11	0.647073	0.873579	0	1.46	0.129276	0.381655	0	1.92	0.005024	0.043306	1	1.12	0.627101	0.866906	0	4
4	FBgn0026573	CG8290	CG8290	1.11	0.500135	0.999395	0	1.15	0.378691	0.97412	0	1.28	0.118722	0.543117	0	1.19	0.265495	0.751946	0	1.16	0.365318	0.865088	0	1.01	0.957087	0.989289	0	1.05	0.752593	0.947689	0	1.15	0.38624	0.726689	0	1.41	0.032877	0.175324	0	1.58	0.005522	0.046593	1	1.11	0.555582	0.834673	0	4
4	FBgn0004379	Kinesin-like protein at 67A	Klp67A	1.01	0.927963	0.999703	0	1.13	0.241745	0.960504	0	1.03	0.749272	0.940166	0	1.06	0.618573	0.929819	0	1.12	0.273545	0.808536	0	-1.01	0.939828	0.986513	0	1.03	0.804898	0.961241	0	1.07	0.502465	0.800497	0	1.21	0.075279	0.28378	0	1.53	0.00014	0.002598	1	1.11	0.339868	0.692722	0	4
4	FBgn0010812	Translocase of outer membrane 34	Tom34	1.11	0.575966	0.999395	0	1.17	0.383387	0.97412	0	-1.05	0.795113	0.951817	0	-1.1	0.613691	0.928978	0	-1.03	0.876442	0.988005	0	-1.04	0.837709	0.963346	0	1.01	0.956848	0.992008	0	1.04	0.826457	0.946239	0	1.16	0.400998	0.683371	0	1.88	0.000821	0.010848	1	1.08	0.677022	0.888728	0	4
4	FBgn0038814	CG15923	CG15923	1.2	0.119905	0.999395	0	1.06	0.61714	0.988335	0	1.06	0.64638	0.904863	0	1.25	0.066815	0.433717	0	1.11	0.397949	0.878192	0	-1.01	0.960122	0.989289	0	-1.02	0.883994	0.976752	0	1.08	0.512711	0.806556	0	1.13	0.299858	0.595448	0	1.54	0.000549	0.007842	1	1.07	0.570881	0.841517	0	4
4	FBgn0015558	tweety	tty	1.23	0.238786	0.999395	0	1.15	0.417544	0.97412	0	1.12	0.520552	0.858982	0	1.31	0.122956	0.574976	0	1.17	0.358346	0.861144	0	-1.01	0.972012	0.993061	0	1.25	0.204264	0.626566	0	1.03	0.856275	0.958261	0	1.06	0.757106	0.901595	0	2.24	7.4e-05	0.001521	1	1.06	0.717193	0.907038	0	4
4	FBgn0027532	CG7139	CG7139	1.03	0.815555	0.999395	0	1.16	0.280874	0.968329	0	1.11	0.466879	0.837366	0	1.04	0.756956	0.963045	0	1.07	0.62063	0.947646	0	-1.01	0.95197	0.98785	0	1.09	0.524523	0.874242	0	1.15	0.330451	0.682754	0	1.37	0.028577	0.160045	0	1.66	0.000579	0.008128	1	1.05	0.726545	0.910519	0	4
4	FBgn0031591	CG15425	CG15425	1.01	0.956799	0.999703	0	1.33	0.073659	0.868144	0	1.07	0.641366	0.903802	0	1.22	0.149757	0.622429	0	1.11	0.411206	0.882509	0	1.04	0.756384	0.941899	0	-1.16	0.284882	0.719032	0	1.06	0.681685	0.887164	0	1.32	0.032065	0.172674	0	1.5	0.002347	0.024797	1	1.02	0.904046	0.971034	0	4
4	FBgn0042198	CG16741	CG16741	-1.05	0.758395	0.999395	0	1.82	0.002292	0.203832	0	1.15	0.459153	0.833617	0	1.17	0.401817	0.840797	0	1.31	0.106608	0.551933	0	1.11	0.517289	0.858661	0	-1.01	0.970059	0.994102	0	1.26	0.221833	0.570868	0	-1.04	0.851809	0.945455	0	1.71	0.00219	0.023481	1	-1	0.977851	0.995677	0	4
4	FBgn0028734	Fmr1	Fmr1	1.1	0.499687	0.999395	0	-1.12	0.415381	0.97412	0	1.02	0.86983	0.974426	0	1.2	0.232047	0.719776	0	-1.04	0.802323	0.979089	0	-1.02	0.864808	0.97112	0	-1.01	0.939126	0.987091	0	-1.06	0.648988	0.873746	0	1.17	0.267116	0.562518	0	1.61	0.001025	0.012928	1	-1.01	0.942794	0.984198	0	4
4	FBgn0028852	CG15262	CG15262	1.01	0.917598	0.999571	0	-1.15	0.258205	0.964139	0	1.08	0.527438	0.861402	0	1.35	0.019263	0.219425	0	1	0.978341	0.997104	0	-1.25	0.077738	0.388834	0	-1.04	0.740048	0.9448	0	-1.03	0.827416	0.946761	0	1.12	0.374991	0.6619	0	1.51	0.001711	0.019502	1	-1.01	0.932127	0.979928	0	4
4	FBgn0034996	CG13575	CG13575	-1.19	0.190251	0.999395	0	1.33	0.036635	0.694909	0	1.18	0.206514	0.652735	0	-1.02	0.854227	0.981041	0	1.28	0.011431	0.145883	0	1.36	0.003757	0.049637	0	1.12	0.236233	0.665434	0	1.32	0.017345	0.136911	0	-1.03	0.753075	0.899761	0	1.52	0.000699	0.009553	1	-1.03	0.788552	0.932921	0	4
4	FBgn0038303	CG6623	CG6623	1.13	0.447422	0.999395	0	1.09	0.593377	0.988335	0	-1.18	0.293269	0.73204	0	1.14	0.407201	0.843603	0	1.08	0.640972	0.952498	0	1.01	0.940804	0.986622	0	-1.11	0.507873	0.865775	0	-1.02	0.880339	0.964761	0	1.21	0.226951	0.516494	0	1.59	0.004235	0.03842	1	-1.1	0.555401	0.834673	0	4
4	FBgn0026754	UDP-glycosyltransferase 37c1	Ugt37c1	-1.37	0.291371	0.999395	0	1.13	0.56663	0.984159	0	-1.07	0.758333	0.944047	0	-1.02	0.955425	0.995382	0	1.04	0.846596	0.985777	0	-1.15	0.634112	0.903648	0	1.16	0.428039	0.820206	0	-1.55	0.150281	0.475439	0	-1.09	0.711438	0.878505	0	1.89	0.002514	0.025919	1	-1.21	0.443522	0.771687	0	4
5	FBgn0031737	obstructor-E	obst-E	-1.06	0.662729	0.999395	0	-1.01	0.919914	0.997504	0	-1.13	0.368318	0.781272	0	-1.15	0.307487	0.787285	0	-1.21	0.179443	0.685486	0	-1.21	0.164459	0.572445	0	-1.08	0.583687	0.897585	0	-1.11	0.453188	0.768568	0	-1.39	0.020157	0.12819	0	-1.66	0.00054	0.007753	1	-1.33	0.045026	0.234329	0	5
6	FBgn0023534	CG17778	CG17778	-1.44	0.035712	0.999395	0	-1.1	0.571061	0.9846	0	-1.28	0.194242	0.639285	0	1.05	0.756767	0.962995	0	1.08	0.633899	0.949803	0	1.44	0.03641	0.248499	0	1.15	0.425914	0.818156	0	1.04	0.830527	0.948174	0	-1.25	0.196733	0.478634	0	-1.72	0.002176	0.023369	1	1.09	0.625288	0.866004	0	6
6	FBgn0033548	CG7637	CG7637	-1.33	0.109766	0.999395	0	1.13	0.52215	0.981924	0	1.13	0.495468	0.84855	0	-1.12	0.548999	0.908279	0	-1.14	0.505731	0.915052	0	-1.05	0.763438	0.944712	0	-1.13	0.472002	0.847489	0	-1.06	0.756022	0.918117	0	-1.52	0.031921	0.172407	0	-2.08	0.001113	0.013839	1	1	0.988638	0.99821	0	6
6	FBgn0052667	CG32667	CG32667	-1.08	0.655474	0.999395	0	-1.17	0.380231	0.97412	0	-1.02	0.92111	0.986316	0	1.11	0.565823	0.91456	0	1.05	0.782767	0.976505	0	1.31	0.138871	0.527133	0	1.06	0.757255	0.949605	0	1.09	0.615285	0.857952	0	-1.18	0.348939	0.640972	0	-1.72	0.003858	0.03576	1	-1.02	0.895872	0.96935	0	6
6	FBgn0063497	Glutathione S transferase E3	GstE3	-1.11	0.439938	0.999395	0	-1.1	0.489014	0.979862	0	-1.04	0.763767	0.944888	0	-1.02	0.921794	0.992099	0	-1.08	0.578938	0.935561	0	1.26	0.082734	0.403184	0	-1.01	0.961698	0.992906	0	-1.08	0.551764	0.826169	0	-1.27	0.070267	0.27303	0	-1.61	0.000601	0.008397	1	-1.05	0.68702	0.893969	0	6
6	FBgn0030743	CG9921	CG9921	-1.14	0.464035	0.999395	0	-1.08	0.678261	0.988335	0	-1.24	0.229842	0.675921	0	1.01	0.967481	0.995382	0	-1.01	0.966225	0.994723	0	-1.23	0.193417	0.616655	0	-1.04	0.822847	0.965438	0	1.1	0.60115	0.850909	0	-1.14	0.424834	0.699698	0	-1.68	0.004839	0.042108	1	-1.07	0.687532	0.894134	0	6
6	FBgn0025827	CG6421	CG6421	-1.22	0.095752	0.999395	0	-1.06	0.623553	0.988335	0	-1.27	0.045227	0.368119	0	-1.26	0.055404	0.394263	0	-1.15	0.241356	0.76968	0	1.24	0.076956	0.387166	0	1.08	0.514161	0.870175	0	-1.13	0.319632	0.671819	0	-1.2	0.128967	0.381218	0	-1.56	0.000437	0.006523	1	-1.07	0.562738	0.837224	0	6
6	FBgn0052341	CG32341	CG32341	1.26	0.182465	0.999395	0	1.02	0.896689	0.997504	0	1.29	0.146566	0.580767	0	1.21	0.335315	0.801986	0	-1.07	0.65026	0.955368	0	-1.04	0.773165	0.947872	0	1.15	0.412461	0.808499	0	-1.01	0.977655	0.993023	0	-1.32	0.075587	0.284698	0	-1.62	0.002672	0.027167	1	-1.09	0.647946	0.875001	0	6
6	FBgn0040773	CG2249	CG2249	-1.12	0.449558	0.999395	0	1.03	0.823893	0.994557	0	1.06	0.688047	0.919125	0	1.06	0.685757	0.946784	0	1.07	0.668727	0.95892	0	1.06	0.708815	0.92899	0	-1.06	0.688596	0.932166	0	-1.05	0.755417	0.918114	0	-1.17	0.2829	0.57791	0	-1.56	0.004211	0.038285	1	-1.09	0.543745	0.828628	0	6
6	FBgn0039031	CG17244	CG17244	-1.07	0.559541	0.999395	0	1.01	0.930715	0.997504	0	-1.06	0.616005	0.895236	0	-1.06	0.625765	0.930509	0	-1.07	0.59824	0.942365	0	1.01	0.925615	0.985271	0	-1.09	0.459746	0.840814	0	-1.11	0.390883	0.730436	0	-1.38	0.008639	0.073691	0	-1.66	7.5e-05	0.001534	1	-1.1	0.406695	0.747322	0	6
6	FBgn0001989	lethal (2) 35Di	l(2)35Di	-1.22	0.184391	0.999395	0	-1	0.989263	0.998783	0	-1.04	0.779919	0.948235	0	-1.07	0.660611	0.941386	0	-1.08	0.631037	0.949054	0	1.06	0.67864	0.918735	0	1	0.981162	0.996167	0	-1.02	0.87891	0.964642	0	-1.33	0.066224	0.264456	0	-1.54	0.005638	0.047354	1	-1.11	0.502782	0.806824	0	6
6	FBgn0036787	CG4306	CG4306	1.1	0.386732	0.999395	0	1.19	0.125877	0.932789	0	-1.01	0.931893	0.986316	0	1.09	0.444156	0.86337	0	-1.15	0.202565	0.719415	0	-1.05	0.680482	0.918735	0	-1.18	0.136485	0.522452	0	-1.01	0.938917	0.983644	0	-1.02	0.880238	0.95759	0	-1.59	9.5e-05	0.001868	1	-1.11	0.34622	0.6979	0	6
6	FBgn0000477	Deoxyribonuclease II	DNaseII	1.17	0.318986	0.999395	0	1.07	0.65511	0.988335	0	-1.09	0.563157	0.876907	0	-1.3	0.095954	0.518789	0	-1.23	0.181162	0.688121	0	1.06	0.717814	0.931581	0	1.12	0.457524	0.83973	0	1.02	0.882463	0.965136	0	-1.36	0.052492	0.232327	0	-1.75	0.000565	0.007957	1	-1.11	0.53344	0.823632	0	6
6	FBgn0033320	CG8586	CG8586	1.33	0.054751	0.999395	0	1.16	0.317999	0.968859	0	1.12	0.430943	0.816129	0	-1.16	0.299948	0.780138	0	-1.14	0.376497	0.870186	0	1.45	0.011809	0.116662	0	1.2	0.209366	0.634422	0	1.01	0.952233	0.985559	0	-1.24	0.140318	0.398518	0	-1.58	0.002416	0.02533	1	-1.13	0.389824	0.735333	0	6
6	FBgn0029927	CG14430	CG14430	-1.28	0.08848	0.999395	0	-1.12	0.41001	0.97412	0	-1.4	0.033208	0.320734	0	-1.12	0.428211	0.855978	0	-1.24	0.132887	0.606316	0	1.02	0.890218	0.977365	0	1.02	0.910047	0.982974	0	-1.18	0.258259	0.610303	0	-1.32	0.05743	0.244341	0	-1.52	0.004583	0.040624	1	-1.13	0.378442	0.726015	0	6
6	FBgn0052230	CG32230	CG32230	-1.23	0.191356	0.999395	0	-1.1	0.5457	0.984159	0	-1.07	0.659479	0.91075	0	-1.06	0.702189	0.950305	0	-1.19	0.281746	0.8146	0	-1	0.975436	0.994205	0	-1.09	0.605181	0.904064	0	-1.24	0.182487	0.524795	0	-1.27	0.132938	0.38629	0	-1.62	0.003287	0.031701	1	-1.14	0.418099	0.755659	0	6
6	FBgn0034851			-1.07	0.62563	0.999395	0	-1.11	0.445223	0.974172	0	-1.16	0.295921	0.733236	0	-1.06	0.690686	0.94757	0	1.06	0.667286	0.958529	0	1.02	0.871446	0.971976	0	-1	0.98037	0.995978	0	-1.06	0.688309	0.889946	0	-1.39	0.022788	0.138489	0	-1.6	0.001463	0.017296	1	-1.15	0.337381	0.690178	0	6
6	FBgn0053277			-1.11	0.470612	0.999395	0	1.13	0.423329	0.97412	0	1.02	0.883649	0.979048	0	-1.1	0.534328	0.906244	0	-1.27	0.112481	0.564986	0	-1.01	0.9394	0.986452	0	-1.21	0.204226	0.626566	0	-1.03	0.834086	0.949754	0	-1.31	0.073509	0.279594	0	-1.66	0.001126	0.013964	1	-1.15	0.355762	0.705367	0	6
6	FBgn0038701	CG18493	CG18493	1.06	0.609702	0.999395	0	-1.01	0.964749	0.99777	0	1.15	0.231838	0.677856	0	-1.03	0.778529	0.966768	0	-1.09	0.493991	0.912147	0	1.27	0.041553	0.267231	0	1.04	0.700969	0.934842	0	1.04	0.702223	0.896744	0	-1.29	0.028578	0.160045	0	-1.63	7e-05	0.001451	1	-1.15	0.226718	0.577113	0	6
6	FBgn0035409	CG14963	CG14963	1.12	0.334348	0.999395	0	-1.05	0.685729	0.988335	0	1.02	0.867786	0.974293	0	1.08	0.503192	0.893362	0	-1.06	0.603575	0.942857	0	-1.03	0.778035	0.948856	0	-1.06	0.619271	0.908357	0	-1.24	0.079886	0.348406	0	-1.4	0.007084	0.065396	0	-1.53	0.000857	0.011279	1	-1.15	0.246356	0.598559	0	6
6	FBgn0040398	CG14629	CG14629	1.18	0.215068	0.999395	0	1.27	0.070857	0.864221	0	1.14	0.318223	0.750456	0	-1.01	0.92447	0.992435	0	-1.14	0.30983	0.833189	0	1.19	0.191474	0.613436	0	1.09	0.529763	0.875725	0	1.06	0.660913	0.879835	0	-1.35	0.025991	0.150505	0	-1.64	0.000329	0.005178	1	-1.15	0.281586	0.634312	0	6
6	FBgn0014000	Helical Factor	Hf	-1.05	0.752079	0.999395	0	1.07	0.620073	0.988335	0	1.05	0.734504	0.933842	0	-1.09	0.524453	0.902133	0	-1.23	0.143727	0.625393	0	1.11	0.446937	0.828499	0	-1.08	0.604441	0.90389	0	-1.15	0.319504	0.671819	0	-1.43	0.01344	0.098422	0	-1.72	0.000298	0.004834	1	-1.15	0.316143	0.670382	0	6
6	FBgn0038080	CG12279	CG12279	-1.16	0.308262	0.999395	0	1.07	0.655152	0.988335	0	1.12	0.445798	0.825775	0	1.16	0.298005	0.778404	0	1.04	0.794106	0.977298	0	1.2	0.207729	0.636469	0	1.01	0.941981	0.98782	0	-1.04	0.78347	0.929968	0	-1.19	0.224557	0.513535	0	-1.53	0.004591	0.040637	1	-1.16	0.300691	0.65451	0	6
6	FBgn0031087	CG12656	CG12656	1	0.988304	0.999703	0	1.22	0.339169	0.969629	0	1.07	0.756258	0.943215	0	-1.03	0.886842	0.98605	0	-1.07	0.733613	0.97072	0	1.1	0.663235	0.913921	0	-1.02	0.935673	0.986605	0	-1.09	0.694383	0.893642	0	-1.43	0.091091	0.314442	0	-1.9	0.003454	0.03304	1	-1.17	0.463	0.783891	0	6
6	FBgn0022355	Transferrin 1	Tsf1	1.16	0.338131	0.999395	0	1.14	0.4016	0.97412	0	1.01	0.931184	0.986316	0	-1	0.981065	0.997497	0	-1.08	0.607738	0.94442	0	1.08	0.635698	0.904069	0	-1.03	0.833407	0.967769	0	1.13	0.426642	0.75562	0	-1.05	0.748455	0.897931	0	-1.61	0.002891	0.028873	1	-1.17	0.297867	0.650949	0	6
6	FBgn0053306	CG33306	CG33306	-1.13	0.405183	0.999395	0	-1.21	0.204906	0.957756	0	-1.17	0.29321	0.73204	0	-1.11	0.470215	0.879275	0	-1.15	0.346509	0.856071	0	1.14	0.37862	0.792574	0	1.15	0.356916	0.771455	0	-1.04	0.777309	0.927115	0	-1.21	0.192784	0.473399	0	-1.54	0.004404	0.039515	1	-1.18	0.271982	0.623265	0	6
6	FBgn0035046	CG3683	CG3683	-1.29	0.095491	0.999395	0	-1.01	0.949682	0.99777	0	1.02	0.890503	0.980922	0	1.01	0.9231	0.992394	0	-1.05	0.732127	0.970271	0	-1.06	0.707101	0.92899	0	-1.06	0.679841	0.928948	0	-1.05	0.7657	0.922192	0	-1.34	0.056642	0.243456	0	-1.55	0.004701	0.04136	1	-1.18	0.272604	0.62374	0	6
6	FBgn0035453	CG10357	CG10357	1.1	0.497212	0.999395	0	1.21	0.169195	0.949455	0	1.17	0.253992	0.70097	0	-1.32	0.032733	0.298596	0	-1.06	0.666473	0.958529	0	1.02	0.892553	0.978037	0	1.07	0.607116	0.904477	0	-1.07	0.642087	0.870596	0	1.08	0.525599	0.7723	0	-1.63	0.000323	0.005113	1	-1.18	0.293523	0.646834	0	6
6	FBgn0032381	CG14934	CG14934	1.01	0.926434	0.999703	0	-1.21	0.09306	0.906369	0	-1.24	0.061199	0.42492	0	-1.23	0.096686	0.520365	0	-1.25	0.05179	0.376165	0	1.13	0.29566	0.722968	0	-1.08	0.525477	0.874242	0	1.01	0.963215	0.988536	0	-1.23	0.075876	0.285296	0	-1.54	0.000383	0.005852	1	-1.18	0.141869	0.459903	0	6
6	FBgn0015039	Cytochrome P450-9b2	Cyp9b2	-1.03	0.825797	0.999395	0	-1.14	0.274185	0.966265	0	-1.03	0.776657	0.947397	0	1.17	0.179623	0.661572	0	-1.05	0.667705	0.958529	0	1.05	0.699795	0.928103	0	1.06	0.611403	0.905506	0	-1.04	0.738931	0.91157	0	-1.26	0.057325	0.244102	0	-1.7	3.3e-05	0.000778	1	-1.19	0.153775	0.477641	0	6
6	FBgn0052231			1.04	0.693546	0.999395	0	-1.04	0.712174	0.988335	0	-1.08	0.460214	0.833647	0	-1.02	0.831773	0.974913	0	-1.1	0.378936	0.871395	0	-1.06	0.604649	0.893663	0	-1.14	0.219703	0.645939	0	-1.18	0.130152	0.442767	0	-1.33	0.011121	0.086552	0	-1.7	3.4e-05	0.0008	1	-1.19	0.118685	0.415178	0	6
6	FBgn0036551	CG17029	CG17029	1.14	0.396342	0.999395	0	1.04	0.800108	0.99325	0	-1.13	0.410327	0.802942	0	-1.22	0.181468	0.663608	0	-1.42	0.021012	0.21478	0	-1.03	0.830884	0.961264	0	-1.07	0.638357	0.91445	0	-1.24	0.161188	0.492978	0	-1.43	0.018725	0.122744	0	-1.63	0.001783	0.020079	1	-1.2	0.221306	0.570628	0	6
6	FBgn0040606	CG6503	CG6503	-1.17	0.485994	0.999395	0	1.15	0.538782	0.984159	0	1.17	0.475515	0.841219	0	1	0.988653	0.9983	0	-1.17	0.482746	0.908785	0	1.19	0.443852	0.828041	0	1.13	0.591513	0.898714	0	1.13	0.584853	0.843051	0	-1.4	0.130113	0.382565	0	-2.07	0.001752	0.019917	1	-1.2	0.406597	0.747322	0	6
6	FBgn0040813	Neuropeptide-like precursor 2	Nplp2	-1.13	0.363807	0.999395	0	1.21	0.164911	0.949455	0	1.27	0.081041	0.472614	0	-1.01	0.935739	0.993774	0	-1.13	0.380913	0.871766	0	1.11	0.456121	0.832901	0	-1.02	0.866799	0.973863	0	-1.09	0.508947	0.804584	0	-1.27	0.081347	0.297114	0	-1.56	0.00186	0.02079	1	-1.21	0.167441	0.497299	0	6
6	FBgn0035661	CG10477	CG10477	-1.08	0.607267	0.999395	0	1.06	0.712268	0.988335	0	1.05	0.730786	0.932729	0	-1.09	0.575049	0.918795	0	-1.36	0.041159	0.328698	0	1.03	0.856103	0.969186	0	-1.1	0.511349	0.868286	0	-1.09	0.567582	0.834923	0	-1.5	0.008357	0.072729	0	-1.7	0.000702	0.009567	1	-1.22	0.195239	0.537919	0	6
6	FBgn0032770	CG13086	CG13086	1	0.980751	0.999703	0	1.03	0.815823	0.994329	0	1.21	0.190547	0.634513	0	1.07	0.638593	0.934049	0	-1.13	0.404519	0.882475	0	1.23	0.168125	0.576725	0	1.13	0.397344	0.798081	0	-1.04	0.789108	0.932138	0	-1.23	0.158536	0.424869	0	-1.61	0.001871	0.0209	1	-1.22	0.184716	0.521386	0	6
6	FBgn0037973	CG18547	CG18547	-1.17	0.115302	0.999395	0	-1.2	0.066838	0.846181	0	-1.09	0.41147	0.803315	0	-1.14	0.246771	0.735224	0	-1.21	0.055184	0.389994	0	-1.03	0.780625	0.949238	0	-1.11	0.299705	0.73175	0	-1.2	0.075026	0.336133	0	-1.36	0.002897	0.034002	0	-1.54	6.3e-05	0.001322	1	-1.22	0.052462	0.257222	0	6
6	FBgn0036992	CG11796	CG11796	1.05	0.513553	0.999395	0	-1.18	0.034177	0.6714	0	-1.18	0.034703	0.326005	0	-1.07	0.372161	0.827308	0	-1.18	0.034389	0.295643	0	-1.08	0.352387	0.77501	0	-1.11	0.176893	0.589308	0	-1.25	0.006557	0.070018	0	-1.32	0.000661	0.010737	0	-1.52	1e-06	4.6e-05	1	-1.22	0.013561	0.100828	0	6
6	FBgn0026562	BM-40-SPARC	BM-40-SPARC	1.04	0.771713	0.999395	0	-1.2	0.175569	0.950325	0	-1.19	0.203222	0.648835	0	-1.15	0.292235	0.772923	0	-1.31	0.046547	0.355736	0	1.2	0.176848	0.589985	0	1.02	0.861563	0.972898	0	-1.07	0.614225	0.857591	0	-1.33	0.035173	0.182841	0	-1.52	0.002595	0.026546	1	-1.22	0.140429	0.457823	0	6
6	FBgn0043534	Odorant-binding protein 57b	Obp57b	1.15	0.276578	0.999395	0	-1.03	0.795857	0.99325	0	-1.04	0.745282	0.938653	0	-1.13	0.340173	0.8054	0	-1.13	0.324954	0.845343	0	1.25	0.08248	0.402597	0	1.11	0.458103	0.840272	0	1.01	0.931438	0.981045	0	-1.26	0.069393	0.270673	0	-1.5	0.002017	0.02213	1	-1.22	0.116142	0.410287	0	6
6	FBgn0030776	CG4653	CG4653	-1.06	0.690346	0.999395	0	-1.06	0.665623	0.988335	0	-1.11	0.469717	0.837641	0	-1.04	0.761607	0.964307	0	-1.25	0.115175	0.56736	0	1.08	0.595628	0.889441	0	1.05	0.740607	0.9448	0	1.01	0.944697	0.984722	0	-1.23	0.133883	0.388241	0	-1.5	0.004646	0.040989	1	-1.22	0.150442	0.472197	0	6
6	FBgn0011834	Serine protease 6	Ser6	-1	0.994743	0.999838	0	-1	0.982035	0.998783	0	-1.06	0.754152	0.942063	0	-1.01	0.950295	0.995382	0	1.03	0.885005	0.98849	0	1.23	0.263784	0.698236	0	-1.04	0.832441	0.967108	0	-1.22	0.286073	0.640314	0	-1.43	0.056682	0.243456	0	-1.89	0.001005	0.012745	1	-1.23	0.270843	0.622005	0	6
6	FBgn0031066	CG14235	CG14235	-1.08	0.559637	0.999395	0	-1.04	0.760132	0.990342	0	-1.01	0.938784	0.986316	0	-1.05	0.745157	0.960717	0	-1.07	0.613583	0.944689	0	-1.09	0.512126	0.857566	0	-1.17	0.255446	0.685804	0	-1.05	0.700628	0.896054	0	-1.39	0.018694	0.122681	0	-1.53	0.002511	0.025913	1	-1.23	0.136451	0.4501	0	6
6	FBgn0031485	CG9643	CG9643	-1.13	0.386352	0.999395	0	-1.03	0.82943	0.994557	0	-1.15	0.321879	0.75367	0	-1.06	0.709696	0.951336	0	-1.11	0.456099	0.902924	0	-1.09	0.51651	0.858397	0	-1.15	0.315166	0.74492	0	-1.16	0.327714	0.67972	0	-1.37	0.044414	0.210615	0	-1.5	0.00498	0.043067	1	-1.23	0.142904	0.461541	0	6
6	FBgn0035146	CG13893	CG13893	1.07	0.590741	0.999395	0	-1.07	0.605793	0.988335	0	-1.08	0.552871	0.872024	0	-1.2	0.158907	0.631879	0	-1.2	0.147634	0.631824	0	-1.24	0.092034	0.426529	0	-1.02	0.878424	0.975339	0	-1.09	0.522948	0.811352	0	-1	0.991847	0.997385	0	-1.5	0.001979	0.021774	1	-1.24	0.098003	0.374551	0	6
6	FBgn0053051	CG33051	CG33051	-1.01	0.93126	0.999703	0	-1.01	0.919624	0.997504	0	-1.06	0.6257	0.89788	0	-1.1	0.430507	0.858066	0	-1.27	0.049902	0.369555	0	-1.06	0.62389	0.900062	0	-1.11	0.371207	0.781098	0	-1.15	0.262136	0.614337	0	-1.3	0.032844	0.175324	0	-1.56	0.000462	0.006789	1	-1.24	0.081008	0.332869	0	6
6	FBgn0034162	CG6426	CG6426	-1.1	0.629969	0.999395	0	-1.08	0.685125	0.988335	0	-1.24	0.268427	0.714862	0	-1.32	0.188787	0.67046	0	-1.47	0.048814	0.365018	0	1.12	0.560924	0.877456	0	1.06	0.745289	0.945193	0	1.04	0.84555	0.953484	0	-1.68	0.008942	0.075538	0	-2.02	0.000555	0.007889	1	-1.24	0.267521	0.618355	0	6
6	FBgn0010453	Wnt oncogene analog 4	Wnt4	1.26	0.120522	0.999395	0	1.09	0.520178	0.981307	0	1.09	0.504812	0.852301	0	-1.14	0.386393	0.833738	0	-1.03	0.838047	0.984857	0	1.02	0.90045	0.979998	0	1.15	0.39694	0.79764	0	1.01	0.972436	0.99117	0	-1.32	0.066728	0.264996	0	-1.6	0.002413	0.02533	1	-1.24	0.14555	0.465853	0	6
6	FBgn0037097	CG7181	CG7181	-1.32	0.081549	0.999395	0	1.05	0.762603	0.990362	0	1.05	0.747003	0.939022	0	1.13	0.494668	0.890247	0	-1	0.991874	0.999937	0	-1.01	0.950014	0.987502	0	-1.12	0.487829	0.854794	0	-1.04	0.828501	0.947671	0	-1.29	0.113831	0.357029	0	-1.77	0.000678	0.009319	1	-1.24	0.175656	0.508814	0	6
6	FBgn0051778	CG31778	CG31778	1.1	0.53523	0.999395	0	-1.04	0.817157	0.994329	0	-1.16	0.326931	0.757274	0	-1.27	0.124454	0.577586	0	-1.6	0.003478	0.062635	0	1.19	0.263321	0.697925	0	1	0.977052	0.995903	0	-1.13	0.44134	0.764195	0	-1.55	0.00626	0.06	0	-1.99	0.000129	0.002429	1	-1.25	0.157195	0.482761	0	6
6	FBgn0030904	unpaired 2	upd2	-1.03	0.763825	0.999395	0	1.05	0.637148	0.988335	0	-1.02	0.886183	0.979517	0	-1.1	0.366966	0.824233	0	-1.3	0.018192	0.197955	0	-1.34	0.008659	0.092242	0	-1.22	0.069676	0.372808	0	-1.44	0.001247	0.020205	0	-1.44	0.00125	0.017706	0	-1.52	0.000243	0.0041	1	-1.25	0.042534	0.225176	0	6
6	FBgn0032889	CG9331	CG9331	1.05	0.585693	0.999395	0	1.06	0.577964	0.985816	0	1.04	0.715313	0.927491	0	-1.1	0.346456	0.809484	0	-1.08	0.458944	0.903502	0	1.01	0.949983	0.987502	0	-1.11	0.304114	0.733812	0	-1.05	0.634826	0.867598	0	-1.31	0.007504	0.06822	0	-1.56	2.9e-05	0.000689	1	-1.25	0.026855	0.165653	0	6
6	FBgn0035325	CG13806	CG13806	-1.01	0.930513	0.999703	0	-1	0.978525	0.998417	0	1.07	0.625888	0.89788	0	-1.21	0.138565	0.605935	0	-1.06	0.627174	0.949038	0	1.24	0.085849	0.412127	0	-1.12	0.366301	0.778053	0	-1.18	0.190428	0.534409	0	-1.08	0.528167	0.773722	0	-1.51	0.001552	0.018089	1	-1.25	0.100706	0.379634	0	6
6	FBgn0034441	CG10081	CG10081	1.26	0.048537	0.999395	0	-1.04	0.719452	0.988335	0	1.05	0.702476	0.924574	0	-1.08	0.519737	0.899928	0	-1.16	0.206255	0.726479	0	-1.05	0.697547	0.926469	0	-1.15	0.246349	0.677743	0	-1.07	0.573259	0.837858	0	-1.31	0.02259	0.137672	0	-1.59	0.000169	0.003032	1	-1.25	0.054529	0.264204	0	6
6	FBgn0031479	Peroxiredoxin 6005	Prx6005	-1.23	0.118282	0.999395	0	1.1	0.474448	0.979338	0	1	0.990577	0.997186	0	-1.03	0.800955	0.970287	0	-1.07	0.584096	0.937935	0	-1.09	0.528372	0.862199	0	-1.06	0.679825	0.928948	0	-1.14	0.332594	0.684187	0	-1.32	0.03644	0.186529	0	-1.51	0.002532	0.026059	1	-1.26	0.085825	0.344794	0	6
6	FBgn0015323	VAChT	VAChT	1.09	0.511859	0.999395	0	-1.03	0.818419	0.994557	0	-1.16	0.194778	0.639311	0	-1.2	0.211257	0.695634	0	-1.13	0.285845	0.817766	0	-1.13	0.30107	0.729504	0	-1.2	0.128727	0.511214	0	-1.26	0.052681	0.274604	0	-1.14	0.317361	0.612227	0	-1.63	9.2e-05	0.001806	1	-1.26	0.069042	0.303124	0	6
6	FBgn0051997	CG31997	CG31997	-1.2	0.203451	0.999395	0	-1.24	0.138925	0.941399	0	-1.13	0.448001	0.825996	0	-1.19	0.272561	0.75728	0	-1.25	0.121233	0.579702	0	1.09	0.554524	0.873169	0	1.07	0.62526	0.909692	0	-1.07	0.63334	0.866708	0	-1.34	0.042038	0.203758	0	-1.55	0.003097	0.030356	1	-1.26	0.104092	0.387067	0	6
6	FBgn0030837	CG8661	CG8661	-1.19	0.187526	0.999395	0	1.12	0.402839	0.97412	0	-1.05	0.706839	0.926468	0	-1.13	0.359416	0.820099	0	1.01	0.944756	0.99213	0	-1.06	0.638475	0.904953	0	-1.23	0.111109	0.474505	0	-1.21	0.142894	0.464131	0	-1.3	0.046006	0.215282	0	-1.59	0.000704	0.00958	1	-1.26	0.075801	0.321176	0	6
6	FBgn0034031	CG12963	CG12963	-1.09	0.612123	0.999395	0	-1.15	0.400792	0.97412	0	-1.09	0.609245	0.893709	0	-1.02	0.888776	0.98605	0	-1.11	0.530388	0.924097	0	1.16	0.378789	0.792574	0	-1.1	0.577641	0.895517	0	-1.09	0.618991	0.859157	0	-1.4	0.049555	0.224622	0	-1.89	0.000331	0.005198	1	-1.27	0.161014	0.488708	0	6
6	FBgn0002590	Ribosomal protein S5a	RpS5a	-1.11	0.307065	0.999395	0	-1.12	0.270782	0.964139	0	-1.17	0.12789	0.560124	0	-1.24	0.042325	0.342818	0	-1.28	0.020498	0.211664	0	1.09	0.415478	0.81596	0	-1.08	0.48319	0.853583	0	-1.17	0.147262	0.470073	0	-1.45	0.00071	0.011351	0	-1.66	8e-06	0.000227	1	-1.27	0.024682	0.156662	0	6
6	FBgn0037433	CG17919	CG17919	-1.06	0.700873	0.999395	0	-1.09	0.596594	0.988335	0	-1.16	0.373585	0.782968	0	-1.09	0.616542	0.929819	0	-1.31	0.100362	0.536501	0	1.02	0.908598	0.982283	0	1.17	0.334096	0.759	0	-1.06	0.699247	0.895634	0	-1.4	0.043416	0.207487	0	-1.88	0.000272	0.004489	1	-1.28	0.135867	0.449301	0	6
6	FBgn0037123	CG14569	CG14569	1.01	0.896791	0.999395	0	-1.02	0.832351	0.995228	0	-1.14	0.215377	0.663019	0	-1.17	0.136354	0.600258	0	-1.25	0.038362	0.314932	0	-1.21	0.078499	0.390121	0	-1.13	0.249802	0.680318	0	-1.15	0.185295	0.528582	0	-1.34	0.007868	0.070595	0	-1.64	1.8e-05	0.000452	1	-1.28	0.024009	0.153318	0	6
6	FBgn0032297	CG17124	CG17124	1.04	0.739648	0.999395	0	-1.07	0.650558	0.988335	0	-1.2	0.165869	0.602022	0	-1.27	0.065381	0.428861	0	-1.37	0.015905	0.18244	0	1.06	0.630439	0.901853	0	-1.03	0.803739	0.961241	0	-1.15	0.282546	0.638265	0	-1.4	0.020077	0.127938	0	-1.51	0.002198	0.023547	1	-1.28	0.058097	0.273692	0	6
6	FBgn0036759	CG5577	CG5577	1.02	0.839125	0.999395	0	-1.02	0.870722	0.997504	0	-1.12	0.309943	0.742653	0	-1.24	0.04952	0.371408	0	-1.26	0.035673	0.302529	0	-1.07	0.561974	0.87772	0	-1.15	0.197433	0.618699	0	-1.48	0.000711	0.012983	0	-1.38	0.004713	0.048777	0	-1.6	6.2e-05	0.00131	1	-1.29	0.024642	0.156558	0	6
6	FBgn0001145	Glutamine synthetase 2	Gs2	1.22	0.102966	0.999395	0	1.09	0.464513	0.977997	0	-1.07	0.5978	0.890219	0	-1.18	0.221887	0.708363	0	-1.38	0.009633	0.130406	0	1.17	0.202047	0.627578	0	1.01	0.911935	0.983054	0	-1.09	0.468279	0.778786	0	-1.38	0.009962	0.081181	0	-1.65	0.000107	0.002072	1	-1.29	0.042037	0.222993	0	6
6	FBgn0028513	CG9254	CG9254	1.09	0.486487	0.999395	0	1	0.969499	0.99777	0	-1.16	0.215048	0.662638	0	-1.14	0.278441	0.761317	0	-1.32	0.024333	0.235532	0	-1.13	0.292473	0.720655	0	-1.23	0.09269	0.435301	0	-1.31	0.02867	0.187588	0	-1.32	0.023676	0.142237	0	-1.55	0.000479	0.006967	1	-1.29	0.036014	0.202518	0	6
6	FBgn0038142	CheA87a	CheA87a	1.25	0.15526	0.999395	0	1.3	0.065732	0.846181	0	-1.15	0.317172	0.748784	0	-1.15	0.326198	0.798955	0	-1.06	0.701677	0.963476	0	-1.24	0.12807	0.505544	0	-1.08	0.615812	0.906681	0	-1.29	0.077928	0.343662	0	-1.2	0.211102	0.495789	0	-2.17	0.002465	0.025654	1	-1.29	0.101206	0.380864	0	6
6	FBgn0026565	CG1315	CG1315	1.02	0.86812	0.999395	0	1.02	0.895576	0.997504	0	1	0.986963	0.996912	0	-1.35	0.028089	0.271095	0	-1.13	0.347127	0.856577	0	1.02	0.860932	0.970494	0	-1.14	0.316583	0.746054	0	-1.28	0.094446	0.379083	0	-1.14	0.365244	0.655176	0	-1.58	0.0025	0.025909	1	-1.29	0.056053	0.267251	0	6
6	FBgn0037698	CG16779	CG16779	-1.22	0.156705	0.999395	0	-1.03	0.849409	0.996946	0	1.01	0.954773	0.989499	0	1.01	0.963639	0.995382	0	1	0.989401	0.999498	0	1.04	0.77403	0.947976	0	-1.13	0.386266	0.791622	0	-1.1	0.488609	0.792543	0	-1.42	0.01409	0.101545	0	-1.63	0.000866	0.011356	1	-1.3	0.064507	0.290592	0	6
6	FBgn0030777	CG9672	CG9672	-1.1	0.277337	0.999395	0	1.02	0.827231	0.994557	0	-1.08	0.414642	0.805177	0	-1.07	0.433562	0.858557	0	-1.16	0.104291	0.546556	0	-1	0.986874	0.997191	0	-1.05	0.625746	0.909692	0	-1.09	0.319734	0.671819	0	-1.27	0.010477	0.08352	0	-1.57	5e-06	0.000153	1	-1.3	0.005109	0.048285	0	6
6	FBgn0016691	Oligomycin sensitivity-conferring protein	Oscp	-1.01	0.941019	0.999703	0	1.01	0.959368	0.99777	0	1.06	0.68314	0.917813	0	1.02	0.909029	0.989909	0	1.01	0.941906	0.99213	0	-1.03	0.820744	0.957864	0	-1.04	0.782027	0.956408	0	-1.04	0.779178	0.928252	0	-1.28	0.096903	0.32592	0	-1.57	0.003454	0.03304	1	-1.3	0.079752	0.33029	0	6
6	FBgn0031689	Cyp28d1	Cyp28d1	1	0.997853	0.999838	0	-1.15	0.206179	0.957756	0	1.22	0.073921	0.457952	0	1.06	0.610752	0.928784	0	-1.15	0.214693	0.738706	0	-1	0.980149	0.995523	0	-1.15	0.215773	0.641705	0	-1.27	0.034908	0.212243	0	-1.39	0.004356	0.045929	0	-1.8	2e-06	7e-05	1	-1.3	0.020354	0.136369	0	6
6	FBgn0024250	brinker	brk	1.05	0.744209	0.999395	0	1.14	0.42768	0.97412	0	-1.05	0.742097	0.936936	0	-1.47	0.043206	0.34694	0	-1.35	0.113511	0.566479	0	-1.32	0.096346	0.43777	0	-1.23	0.221134	0.647838	0	-1.22	0.229508	0.580123	0	-1.13	0.454799	0.722689	0	-1.76	0.003818	0.035468	1	-1.31	0.156174	0.481011	0	6
6	FBgn0039690	CG1969	CG1969	1.08	0.365815	0.999395	0	-1.08	0.329621	0.968964	0	-1.17	0.060977	0.424318	0	-1.27	0.005361	0.099359	0	-1.22	0.018682	0.20135	0	-1.15	0.102955	0.454447	0	-1.24	0.011657	0.120612	0	-1.31	0.001654	0.025262	0	-1.5	9e-06	0.000289	0	-1.54	2e-06	7.7e-05	1	-1.31	0.001732	0.021458	0	6
6	FBgn0029084	gomdanji	gom	1.06	0.652536	0.999395	0	1.01	0.942345	0.99777	0	-1.24	0.095879	0.503563	0	-1.2	0.1518	0.624391	0	-1.27	0.058643	0.404327	0	-1.07	0.613199	0.896586	0	-1.05	0.699343	0.934842	0	-1.45	0.004291	0.050596	0	-1.42	0.006976	0.064592	0	-1.68	0.000115	0.002212	1	-1.31	0.033283	0.19273	0	6
6	FBgn0033459	CG12744	CG12744	1	0.982551	0.999703	0	1.04	0.782923	0.993242	0	-1.06	0.712166	0.926934	0	-1.16	0.302242	0.782981	0	-1.19	0.242813	0.771369	0	-1.17	0.293707	0.721101	0	-1.26	0.122809	0.500438	0	-1.17	0.291612	0.645488	0	-1.47	0.010643	0.084208	0	-1.58	0.002593	0.026546	1	-1.32	0.060413	0.279748	0	6
6	FBgn0031085	CG9570	CG9570	-1.06	0.630936	0.999395	0	1.21	0.133657	0.940266	0	1.02	0.88101	0.978874	0	-1.11	0.389714	0.835419	0	-1.15	0.266747	0.799087	0	-1.18	0.193327	0.616619	0	-1.24	0.093488	0.436243	0	-1.2	0.152611	0.478398	0	-1.39	0.010519	0.083595	0	-1.52	0.001374	0.016514	1	-1.33	0.024799	0.157222	0	6
6	FBgn0019644	ATP synthase, subunit b	ATPsyn-b	-1.09	0.522909	0.999395	0	-1	0.978524	0.998417	0	-1.04	0.762982	0.944888	0	-1.22	0.125997	0.581542	0	-1.2	0.150215	0.636711	0	-1.05	0.706016	0.92899	0	-1.07	0.584599	0.89763	0	-1.07	0.582192	0.842286	0	-1.43	0.006267	0.06	0	-1.63	0.000312	0.004988	1	-1.33	0.027351	0.16832	0	6
6	FBgn0000406	Cytochrome b5-related	Cyt-b5-r	1.11	0.560249	0.999395	0	-1.13	0.512453	0.981307	0	-1.69	0.005604	0.115109	0	-1.44	0.050745	0.37457	0	-1.74	0.003597	0.064162	0	1.19	0.347232	0.771608	0	1.02	0.897414	0.979877	0	-1.16	0.433272	0.760625	0	-1.7	0.005217	0.052832	0	-2.01	0.00033	0.005189	1	-1.33	0.120754	0.4197	0	6
6	FBgn0053192	Metallothionein D	MtnD	-1.06	0.780341	0.999395	0	1.35	0.163891	0.949455	0	1.41	0.107752	0.523041	0	-1.07	0.75458	0.962022	0	-1.23	0.336061	0.851817	0	1.08	0.707416	0.92899	0	-1.19	0.413841	0.808648	0	-1.14	0.541587	0.823311	0	-1.78	0.008627	0.073691	0	-2.31	0.000208	0.003597	1	-1.34	0.174397	0.507539	0	6
6	FBgn0036211	CG5946	CG5946	-1.05	0.57876	0.999395	0	-1.14	0.122052	0.928529	0	-1.15	0.096293	0.504128	0	-1.15	0.083542	0.486774	0	-1.26	0.00554	0.088578	0	-1.04	0.625419	0.900847	0	-1.1	0.251426	0.681722	0	-1.22	0.017143	0.135995	0	-1.45	2.7e-05	0.000744	0	-1.61	0	1.1e-05	1	-1.34	0.000584	0.008748	0	6
6	FBgn0036870	CG14095	CG14095	-1.05	0.643993	0.999395	0	1.08	0.451428	0.976471	0	-1.09	0.433155	0.817615	0	-1.16	0.161604	0.636582	0	-1.17	0.139401	0.618435	0	-1.15	0.184902	0.602663	0	-1.21	0.079062	0.400935	0	-1.28	0.02422	0.168539	0	-1.41	0.001762	0.023106	0	-1.54	0.000148	0.002727	1	-1.35	0.006249	0.056496	0	6
6	FBgn0033644	CG8234	CG8234	-1	0.9843	0.999703	0	-1.19	0.108407	0.92052	0	-1.03	0.760614	0.944106	0	-1.28	0.027581	0.269556	0	-1.5	0.000411	0.011359	0	1.08	0.488416	0.845197	0	1.06	0.578715	0.895968	0	-1.02	0.885359	0.966304	0	-1.27	0.028576	0.160045	0	-1.63	2.8e-05	0.000676	1	-1.35	0.007162	0.062722	0	6
6	FBgn0010387	Diazepam-binding inhibitor	Dbi	-1.02	0.939054	0.999703	0	1.19	0.440821	0.974172	0	1.08	0.727145	0.932045	0	-1.06	0.797058	0.969442	0	1.01	0.953775	0.993244	0	1.4	0.143399	0.534225	0	1.24	0.353011	0.768746	0	1.1	0.687918	0.889852	0	-1.29	0.261111	0.556109	0	-2.14	0.001383	0.016587	1	-1.35	0.186451	0.523697	0	6
6	FBgn0019936	Ribosomal protein S20	RpS20	-1.26	0.134387	0.999395	0	1.18	0.276457	0.968329	0	1.11	0.478714	0.842734	0	-1.01	0.938839	0.993999	0	-1.04	0.819482	0.983305	0	-1	0.986141	0.99691	0	-1.06	0.696497	0.933681	0	1.12	0.45002	0.767622	0	-1.32	0.073734	0.280043	0	-1.59	0.003169	0.030808	1	-1.36	0.048007	0.244604	0	6
6	FBgn0005322	no mitochondrial derivative	nmd	1.14	0.078694	0.999395	0	1.13	0.09533	0.908049	0	-1.03	0.685938	0.918551	0	-1.24	0.005413	0.100069	0	-1.29	0.001144	0.026199	0	-1.24	0.006257	0.072531	0	-1.26	0.003064	0.046088	0	-1.33	0.000377	0.007654	0	-1.45	7e-06	0.000218	0	-1.52	1e-06	2.2e-05	1	-1.36	0.000132	0.002624	0	6
6	FBgn0037290	CG1124	CG1124	-1.11	0.342036	0.999395	0	-1.12	0.315377	0.968665	0	-1.29	0.025257	0.275138	0	-1.21	0.101007	0.531359	0	-1.42	0.002631	0.050485	0	1.09	0.438147	0.825403	0	1.15	0.226185	0.653307	0	-1.09	0.427855	0.75685	0	-1.36	0.008175	0.071998	0	-1.57	0.000181	0.00321	1	-1.36	0.008511	0.071099	0	6
6	FBgn0051813	CG31813	CG31813	-1.15	0.335407	0.999395	0	1.18	0.259237	0.964139	0	1.13	0.390105	0.791677	0	1.09	0.559483	0.91235	0	-1.14	0.382083	0.872261	0	-1.06	0.709593	0.92899	0	-1.4	0.038353	0.262578	0	-1.28	0.095054	0.380359	0	-1.33	0.058066	0.245671	0	-1.54	0.004791	0.041918	1	-1.36	0.040421	0.218059	0	6
6	FBgn0031184	CG14615	CG14615	1.01	0.894592	0.999395	0	-1.23	0.029904	0.642182	0	-1.03	0.772057	0.94571	0	-1.11	0.276111	0.759674	0	-1.23	0.02776	0.25752	0	-1.14	0.196377	0.621527	0	-1.19	0.063607	0.35405	0	-1.05	0.58641	0.843898	0	-1.45	0.000218	0.00426	0	-1.5	0.000199	0.003458	1	-1.36	0.001616	0.020363	0	6
6	FBgn0032337	Allatostatin double C	Ast-CC	1.07	0.547134	0.999395	0	1.06	0.638757	0.988335	0	1.03	0.775213	0.946665	0	-1.11	0.348973	0.811041	0	-1.32	0.019235	0.20473	0	-1.2	0.112102	0.47321	0	-1.25	0.056543	0.331876	0	-1.25	0.054155	0.278629	0	-1.48	0.001141	0.016443	0	-1.55	0.00031	0.004971	1	-1.36	0.008406	0.070472	0	6
6	FBgn0037076	CG12972	CG12972	1.23	0.039608	0.999395	0	-1.14	0.178968	0.950325	0	1.1	0.320181	0.752094	0	1.01	0.900849	0.987432	0	-1.14	0.197069	0.711473	0	-1.06	0.526268	0.861697	0	-1.26	0.022235	0.183941	0	-1.14	0.183789	0.526916	0	-1.29	0.011993	0.091016	0	-1.51	0.000105	0.002047	1	-1.37	0.002272	0.026787	0	6
6	FBgn0034515	CG13428	CG13428	-1.03	0.83629	0.999395	0	-1.01	0.955029	0.99777	0	-1.14	0.390837	0.79193	0	-1.11	0.539283	0.906923	0	-1.15	0.379239	0.871395	0	-1.09	0.589705	0.887339	0	-1.24	0.163101	0.566086	0	-1.14	0.40835	0.744154	0	-1.27	0.120415	0.367336	0	-1.63	0.002385	0.025076	1	-1.37	0.044133	0.231406	0	6
6	FBgn0039357	CG4743	CG4743	-1.09	0.394036	0.999395	0	1.02	0.853001	0.996946	0	-1.26	0.024536	0.272401	0	-1.14	0.207072	0.691398	0	-1.15	0.171977	0.675624	0	-1.15	0.156572	0.558366	0	-1.26	0.04305	0.28196	0	-1.24	0.037143	0.221178	0	-1.37	0.002934	0.034268	0	-1.58	0.00012	0.00229	1	-1.38	0.002135	0.025555	0	6
6	FBgn0035422	Ribosomal protein L28	RpL28	1.06	0.761016	0.999395	0	1.06	0.760475	0.990342	0	-1.09	0.656549	0.909572	0	-1.38	0.091165	0.506311	0	-1.3	0.164226	0.663005	0	-1.25	0.234381	0.668027	0	-1.19	0.348448	0.766562	0	-1.4	0.079181	0.346481	0	-1.66	0.008704	0.074104	0	-1.78	0.003089	0.030328	1	-1.39	0.085561	0.344246	0	6
6	FBgn0039836	CG1750	CG1750	1.19	0.180026	0.999395	0	1.09	0.485759	0.979862	0	1.06	0.640426	0.90365	0	-1.35	0.031745	0.294002	0	-1.08	0.530875	0.924097	0	-1.14	0.311269	0.740969	0	-1.28	0.055227	0.327601	0	-1.18	0.185163	0.52854	0	-1.23	0.107871	0.34635	0	-1.57	0.000679	0.009322	1	-1.39	0.011369	0.08822	0	6
6	FBgn0051548	CG31548	CG31548	1.03	0.768365	0.999395	0	1.11	0.323197	0.968964	0	1.02	0.829093	0.965574	0	-1.09	0.380143	0.83099	0	-1.18	0.110188	0.560972	0	-1.18	0.111079	0.470402	0	-1.21	0.068308	0.3689	0	-1.26	0.023969	0.167414	0	-1.46	0.000424	0.007409	0	-1.61	1.7e-05	0.000444	1	-1.39	0.001976	0.023987	0	6
6	FBgn0035800	CG7716	CG7716	-1.01	0.940275	0.999703	0	-1.18	0.257372	0.964139	0	1.1	0.528727	0.861762	0	1.11	0.487174	0.885495	0	-1.05	0.744167	0.971631	0	-1.06	0.689677	0.923438	0	-1.31	0.068882	0.370632	0	-1.2	0.219843	0.568417	0	-1.53	0.005299	0.053289	0	-1.75	0.000371	0.00573	1	-1.39	0.02999	0.179027	0	6
6	FBgn0036135	mitochondrial ribosomal protein L2	mRpL2	1.01	0.957868	0.999703	0	1.1	0.406822	0.97412	0	1.08	0.52409	0.860632	0	-1.03	0.801062	0.970287	0	-1.07	0.580802	0.93665	0	1.05	0.655502	0.911215	0	1.02	0.835493	0.968395	0	1.02	0.891586	0.967707	0	-1.37	0.008292	0.072518	0	-1.58	0.000191	0.003356	1	-1.39	0.005421	0.050819	0	6
6	FBgn0039776	prolyl-4-hydroxylase-alpha EFB	PH4alphaEFB	1.13	0.332311	0.999395	0	1.08	0.55002	0.984159	0	-1.16	0.228041	0.674692	0	-1.29	0.046387	0.359527	0	-1.14	0.304005	0.830036	0	1.13	0.343497	0.768558	0	1.02	0.865285	0.973403	0	-1	0.968937	0.990053	0	-1.2	0.148689	0.409324	0	-1.58	0.000497	0.007197	1	-1.4	0.015564	0.111735	0	6
6	FBgn0031702	fuseless	fusl	1.1	0.226942	0.999395	0	1.02	0.839112	0.995598	0	-1.14	0.119769	0.54559	0	-1.17	0.053561	0.387719	0	-1.42	6e-05	0.002378	0	-1.27	0.005101	0.062489	0	-1.25	0.009031	0.099873	0	-1.24	0.010045	0.09493	0	-1.44	3.8e-05	0.000962	0	-1.7	0	1e-06	1	-1.4	0.000109	0.002267	0	6
6	FBgn0001114	Glutactin	Glt	1.18	0.181916	0.999395	0	1.02	0.85624	0.996946	0	-1.1	0.448897	0.826274	0	-1.26	0.065584	0.429549	0	-1.47	0.00264	0.050585	0	-1.05	0.720318	0.932285	0	-1.06	0.642538	0.914837	0	-1.17	0.207051	0.554003	0	-1.38	0.010873	0.085428	0	-1.71	5.2e-05	0.001125	1	-1.42	0.005703	0.052832	0	6
6	FBgn0034861	CG9815	CG9815	-1.21	0.109302	0.999395	0	1.11	0.38466	0.97412	0	-1.16	0.209409	0.65665	0	-1.17	0.176792	0.658337	0	-1.3	0.03004	0.269911	0	-1.22	0.090954	0.423666	0	-1.21	0.109881	0.471423	0	-1.22	0.133443	0.448068	0	-1.48	0.001412	0.019537	0	-1.99	0	1.1e-05	1	-1.44	0.003124	0.033991	0	6
6	FBgn0050445			1.24	0.079442	0.999395	0	-1.15	0.239631	0.960504	0	-1.07	0.565215	0.877792	0	-1.05	0.681042	0.945926	0	-1.27	0.049616	0.368057	0	1.04	0.732276	0.936129	0	-1.19	0.157095	0.556119	0	-1.21	0.109218	0.403881	0	-1.44	0.003119	0.03581	0	-1.54	0.000633	0.008791	1	-1.44	0.003506	0.036548	0	6
6	FBgn0037001	CG6020	CG6020	1.18	0.083905	0.999395	0	-1.01	0.920618	0.997504	0	1.02	0.847886	0.970944	0	-1.08	0.417549	0.849874	0	-1.11	0.292704	0.820908	0	-1.09	0.359354	0.779748	0	-1.28	0.012328	0.125426	0	-1.16	0.112332	0.409484	0	-1.46	0.000172	0.003486	0	-1.74	0	1.2e-05	1	-1.44	0.000289	0.004932	0	6
6	FBgn0052633	CG32633	CG32633	1.14	0.404982	0.999395	0	1.05	0.736786	0.989139	0	-1.14	0.388178	0.7911	0	-1.4	0.031989	0.295502	0	-1.37	0.0451	0.348527	0	1.04	0.814853	0.956293	0	-1.12	0.473729	0.849115	0	-1.04	0.797774	0.936064	0	-1.4	0.030551	0.167819	0	-2.02	2.3e-05	0.000567	1	-1.44	0.019885	0.134114	0	6
6	FBgn0036783	CheA75a	CheA75a	-1.01	0.919273	0.999703	0	-1.08	0.575828	0.985816	0	-1.12	0.410944	0.803011	0	-1.23	0.164779	0.641156	0	-1.2	0.182236	0.69006	0	-1.2	0.196733	0.621648	0	-1.29	0.070017	0.373805	0	-1.17	0.250467	0.604108	0	-1.24	0.1261	0.377068	0	-1.6	0.00116	0.014291	1	-1.44	0.009408	0.076811	0	6
6	FBgn0031581	CG10039	CG10039	-1.27	0.010431	0.822654	0	-1.03	0.715755	0.988335	0	-1.03	0.761255	0.944385	0	-1.3	0.006158	0.108385	0	-1.27	0.01131	0.144848	0	-1.18	0.070352	0.36932	0	-1.15	0.122851	0.500438	0	-1.16	0.119798	0.424688	0	-1.25	0.019874	0.127448	0	-1.56	9e-06	0.000252	1	-1.45	0.000154	0.002953	0	6
6	FBgn0031801	CG9498	CG9498	1.21	0.121621	0.999395	0	-1.16	0.227559	0.958634	0	-1.17	0.197896	0.643745	0	-1.2	0.143124	0.612025	0	-1.32	0.028576	0.261949	0	1.21	0.130212	0.509719	0	-1.03	0.814341	0.964076	0	-1.29	0.043272	0.244337	0	-1.45	0.003718	0.041001	0	-1.53	0.001011	0.012805	1	-1.45	0.003884	0.039275	0	6
6	FBgn0003950	uncoordinated	unc	-1.02	0.905938	0.999395	0	-1.03	0.885951	0.997504	0	-1.16	0.463044	0.83494	0	-1.31	0.198365	0.678509	0	-1.05	0.804658	0.979555	0	-1.05	0.80987	0.955648	0	-1.19	0.411544	0.808027	0	-1.05	0.821358	0.94421	0	-1.06	0.803493	0.92481	0	-1.9	0.002991	0.029741	1	-1.46	0.073346	0.31502	0	6
6	FBgn0014343	mirror	mirr	1.27	0.095776	0.999395	0	1.14	0.340843	0.969629	0	-1.16	0.287527	0.729213	0	-1.24	0.17097	0.650978	0	-1.27	0.122506	0.581562	0	-1.16	0.284569	0.715095	0	-1.15	0.370398	0.781098	0	-1.33	0.042554	0.241732	0	-1.37	0.044253	0.209928	0	-1.51	0.004714	0.041423	1	-1.46	0.01605	0.114353	0	6
6	FBgn0040832	CG8012	CG8012	-1.05	0.824277	0.999395	0	-1.09	0.663356	0.988335	0	-1.12	0.564209	0.877487	0	-1.15	0.495423	0.890247	0	-1.27	0.239415	0.766841	0	1.3	0.197907	0.623141	0	1.16	0.470785	0.847336	0	-1.23	0.304622	0.658054	0	-1.47	0.061012	0.252361	0	-2.14	0.000399	0.006044	1	-1.47	0.087692	0.349413	0	6
6	FBgn0022774	Ornithine aminotransferase precursor	Oat	1.63	0.000178	0.229932	0	-1.25	0.07615	0.873932	0	-1.2	0.142042	0.577349	0	-1.3	0.055175	0.393317	0	-1.31	0.030591	0.272626	0	1.1	0.423657	0.817885	0	1	0.980948	0.996103	0	-1.07	0.55867	0.830089	0	-1.32	0.024938	0.146782	0	-1.54	0.000853	0.011247	1	-1.48	0.002327	0.027231	0	6
6	FBgn0034883	CG17664	CG17664	1.22	0.201279	0.999395	0	1.06	0.705796	0.988335	0	-1.01	0.972701	0.994476	0	-1.36	0.053535	0.387719	0	-1.24	0.176583	0.682501	0	-1.17	0.306888	0.735714	0	-1.42	0.026498	0.206842	0	-1.41	0.049752	0.266486	0	-1.57	0.005105	0.051867	0	-1.89	0.000459	0.006771	1	-1.48	0.01376	0.102071	0	6
6	FBgn0029765	CG16756	CG16756	-1.13	0.563669	0.999395	0	-1.02	0.934631	0.997504	0	-1.11	0.613608	0.894415	0	1.02	0.938289	0.99386	0	-1.23	0.332299	0.849323	0	-1.17	0.475188	0.840196	0	-1.21	0.376336	0.785229	0	-1.51	0.056138	0.284918	0	-1.86	0.004917	0.05034	0	-2.6	3.4e-05	0.000793	1	-1.49	0.065853	0.293938	0	6
6	FBgn0026268	antdh	antdh	1.1	0.620023	0.999395	0	-1.1	0.634917	0.988335	0	1.27	0.217476	0.664689	0	-1.06	0.782924	0.966768	0	-1.25	0.254867	0.785149	0	-1.1	0.63631	0.904069	0	-1.22	0.313486	0.742615	0	-1.25	0.254708	0.607298	0	-1.49	0.044768	0.211689	0	-2.26	0.000312	0.004988	1	-1.49	0.042715	0.225677	0	6
6	FBgn0038702	CG3739	CG3739	-1.01	0.967211	0.999703	0	-1.17	0.355387	0.971264	0	-1.2	0.276796	0.72192	0	-1.05	0.774945	0.966768	0	-1.16	0.394813	0.877495	0	-1.31	0.114306	0.477454	0	-1.21	0.261113	0.691445	0	-1.07	0.727665	0.906142	0	-1.34	0.092325	0.317035	0	-1.69	0.003045	0.030025	1	-1.51	0.018899	0.129121	0	6
6	FBgn0051324	CG31324	CG31324	1.44	0.020169	0.957371	0	-1.05	0.726524	0.988753	0	1.08	0.634966	0.902202	0	-1.05	0.746809	0.960717	0	-1.21	0.211028	0.734283	0	-1.04	0.810978	0.955648	0	-1.17	0.298032	0.73073	0	-1.36	0.04624	0.254851	0	-1.47	0.013814	0.100355	0	-1.56	0.004659	0.041047	1	-1.52	0.008187	0.068985	0	6
6	FBgn0038761	CG17190	CG17190	-1.17	0.400099	0.999395	0	1.03	0.8916	0.997504	0	-1.31	0.119542	0.54489	0	-1.08	0.676408	0.945791	0	-1.95	0.007748	0.112416	0	-1	0.991194	0.998053	0	1	0.994452	0.998615	0	1.26	0.172262	0.510688	0	-1.27	0.212991	0.498251	0	-2.35	4e-05	0.000904	1	-1.53	0.029475	0.176995	0	6
6	FBgn0038914	female-specific independent of transformer	fit	1.04	0.82498	0.999395	0	1.06	0.778502	0.991978	0	1.32	0.169058	0.605977	0	-1.02	0.935402	0.993774	0	-1.32	0.163811	0.66196	0	1.17	0.430472	0.821986	0	1.02	0.939217	0.987091	0	-1.17	0.44197	0.764195	0	-1.52	0.037295	0.189723	0	-1.91	0.001767	0.020002	1	-1.6	0.020592	0.137471	0	6
6	FBgn0033702	CG8854	CG8854	1.06	0.802302	0.999395	0	1.16	0.324194	0.968964	0	-1.23	0.171741	0.608413	0	-1.64	0.004586	0.090252	0	-1.54	0.006766	0.102942	0	1.14	0.446799	0.828499	0	-1.29	0.1295	0.512934	0	-1.35	0.172506	0.51091	0	-1.62	0.012032	0.091119	0	-1.75	0.001525	0.017804	1	-1.62	0.005454	0.051027	0	6
6	FBgn0036768	CG7402	CG7402	-1.2	0.289228	0.999395	0	1.12	0.493093	0.980086	0	-1	0.983487	0.996892	0	-1.51	0.158862	0.631879	0	-1.17	0.414126	0.884145	0	-1.4	0.053368	0.313879	0	1.06	0.793312	0.958169	0	1.24	0.245568	0.599517	0	-1.55	0.021246	0.132421	0	-1.9	0.003072	0.030249	1	-1.97	0.025587	0.160466	0	6
6	FBgn0002563	Larval serum protein 1 beta	Lsp1beta	-1.07	0.81947	0.999395	0	-1.11	0.713275	0.988335	0	1.51	0.158099	0.593141	0	1.79	0.046559	0.359591	0	1.34	0.308208	0.831567	0	-1.47	0.186359	0.605007	0	-1.28	0.390266	0.794303	0	-1.31	0.402925	0.739981	0	-2.24	0.013637	0.099263	0	-2.54	0.001927	0.021381	1	-2.05	0.015161	0.109242	0	6
7	FBgn0039663	CG2321	CG2321	-1.06	0.745472	0.999395	0	-1.07	0.722525	0.98842	0	1.09	0.653084	0.908344	0	1.12	0.545324	0.907699	0	1.24	0.261558	0.79425	0	1.09	0.631656	0.902414	0	1.34	0.161686	0.563674	0	1.37	0.098649	0.38605	0	1.58	0.018578	0.122286	0	2.46	1.3e-05	0.000338	1	1.57	0.019487	0.131972	0	7
7	FBgn0033010	Atf6	Atf6	1	0.981112	0.999703	0	-1.08	0.703755	0.988335	0	-1.03	0.866104	0.97407	0	1.21	0.339771	0.805172	0	1.16	0.446742	0.897692	0	1.14	0.490263	0.846038	0	1.17	0.411889	0.808137	0	1.21	0.322905	0.675101	0	1.66	0.011398	0.08808	0	1.79	0.004026	0.036982	1	1.48	0.04933	0.249208	0	7
7	FBgn0053182	Histone demethylase 4B	Kdm4B	1.01	0.948735	0.999703	0	1.04	0.818246	0.994557	0	1.02	0.899017	0.983167	0	1.14	0.4694	0.87883	0	1.13	0.453958	0.901622	0	1.04	0.807649	0.955648	0	1.25	0.173879	0.583964	0	1.41	0.061122	0.300241	0	1.51	0.014195	0.101971	0	1.77	0.000869	0.011369	1	1.46	0.022847	0.148129	0	7
7	FBgn0053542	unpaired 3	upd3	1.15	0.389146	0.999395	0	1.05	0.740701	0.989483	0	1.21	0.238339	0.685552	0	1.18	0.308481	0.78841	0	1.24	0.184268	0.694024	0	1.32	0.082519	0.402638	0	1.05	0.741873	0.945028	0	1.53	0.016551	0.132656	0	1	0.992352	0.997665	0	1.77	0.000634	0.008796	1	1.45	0.022533	0.146778	0	7
7	FBgn0037844	CG4570	CG4570	-1.04	0.679241	0.999395	0	1.07	0.486363	0.979862	0	1.22	0.050565	0.390487	0	1.28	0.016128	0.199069	0	1.27	0.019722	0.207061	0	1.14	0.177055	0.589985	0	1.18	0.09957	0.449002	0	1.31	0.007203	0.07514	0	1.29	0.010965	0.085903	0	1.53	6.3e-05	0.001312	1	1.43	0.001497	0.019087	0	7
7	FBgn0028953	CG14478	CG14478	1.03	0.883608	0.999395	0	1.22	0.28329	0.968329	0	1.14	0.482003	0.843935	0	1.24	0.233646	0.721737	0	1.28	0.178901	0.685101	0	1.17	0.376429	0.790625	0	1.22	0.277544	0.710513	0	1.23	0.264947	0.617615	0	1.57	0.01495	0.105481	0	1.68	0.005491	0.046355	1	1.39	0.072262	0.312669	0	7
7	FBgn0039596	CG10000	CG10000	-1.13	0.583529	0.999395	0	-1.09	0.721229	0.98842	0	1.11	0.594423	0.889017	0	-1.04	0.853645	0.981041	0	1.36	0.17054	0.673401	0	1.62	0.034585	0.241047	0	1.43	0.080047	0.404077	0	1.68	0.042724	0.242492	0	1.38	0.259168	0.55422	0	1.84	0.003904	0.036122	1	1.28	0.223881	0.574019	0	7
7	FBgn0032938	CG8671	CG8671	-1.1	0.539579	0.999395	0	-1.09	0.557877	0.984159	0	-1.01	0.972771	0.994476	0	1.03	0.868343	0.983065	0	1.02	0.901039	0.98988	0	1.13	0.414314	0.81596	0	1.21	0.217895	0.643936	0	1.12	0.465677	0.776731	0	1.45	0.017298	0.116609	0	1.54	0.005931	0.049252	1	1.25	0.145081	0.465134	0	7
7	FBgn0033949	CG10131	CG10131	1.43	0.029838	0.964922	0	1.37	0.053038	0.782474	0	1.45	0.024781	0.273277	0	1.92	0.000503	0.017645	1	1.41	0.035867	0.303006	0	1.71	0.001498	0.024892	1	1.96	0.000375	0.00901	1	1.67	0.002319	0.032315	1	1.88	0.000227	0.004409	1	1.51	0.022765	0.122292	0	1.57	0.006646	0.059305	0	7
3	FBgn0035241	CG12105	CG12105	1.34	0.046473	0.999395	0	-1.26	0.10947	0.92052	0	-1.21	0.190378	0.634472	0	-1.61	0.003784	0.079586	0	-1.54	0.008382	0.118794	0	-1.73	0.000345	0.007678	1	-1.58	0.002354	0.038007	1	-1.54	0.003919	0.0473	1	-1.61	0.001516	0.020571	1	-1.38	0.028884	0.141989	0	-1.38	0.027694	0.169827	0	3
3	FBgn0000210	broad	br	-1.18	0.278278	0.999395	0	-1.08	0.630731	0.988335	0	1.04	0.820818	0.962159	0	-1.57	0.003859	0.080699	0	1.06	0.692251	0.962975	0	-1.71	0.000774	0.014884	1	-1.8	0.000251	0.00645	1	-1.97	0.000149	0.003518	1	-1.7	0.002425	0.029745	1	-1.31	0.078127	0.264984	0	-1.59	0.00701	0.061638	0	3
5	FBgn0051087	CG31087	CG31087	1.23	0.300744	0.999395	0	1.46	0.067431	0.8474	0	1.51	0.044529	0.365606	0	1.81	0.009629	0.142853	0	1.57	0.028817	0.263239	0	2.73	6e-06	0.000274	1	2.39	6.1e-05	0.001998	1	2.37	7.1e-05	0.001953	1	2.02	0.000952	0.014163	1	1.31	0.221683	0.485266	0	1.56	0.03057	0.180848	0	5
7	FBgn0033304	Cyp6a13	Cyp6a13	1.12	0.305825	0.999395	0	1.4	0.002308	0.203832	0	1.34	0.007957	0.14568	0	1.32	0.011241	0.155146	0	1.3	0.016739	0.187427	0	1.56	9e-05	0.002551	1	1.58	6e-05	0.001971	1	1.64	7e-05	0.001923	1	1.62	2.5e-05	0.000698	1	1.34	0.007912	0.059876	0	1.48	0.000522	0.007981	0	7
7	FBgn0052107	CG32107	CG32107	1.53	0.024253	0.964922	0	1	0.996381	0.999341	0	1.76	0.003094	0.080527	0	1.27	0.194653	0.674546	0	1.33	0.123736	0.583728	0	2.2	6.4e-05	0.001918	1	1.59	0.013664	0.134813	0	2.29	0.000118	0.002977	1	1.88	0.001089	0.015836	1	1.32	0.130364	0.359028	0	1.61	0.011578	0.089418	0	7
2	FBgn0028400	Synaptotagmin 4	Syt4	-1.09	0.453893	0.999395	0	-1.35	0.003844	0.260452	0	-1.33	0.006401	0.125963	0	-1.6	1.7e-05	0.001277	1	-1.57	3.4e-05	0.001515	1	-1.39	0.003663	0.048639	0	-1.46	0.000344	0.008414	0	-1.67	4e-06	0.000161	1	-1.71	2e-06	6.5e-05	1	-1.26	0.023761	0.125738	0	-1.42	0.000898	0.01259	0	2
2	FBgn0039325	CG10560	CG10560	1.17	0.238942	0.999395	0	-1.05	0.716236	0.988335	0	-1.13	0.360776	0.775724	0	-1.4	0.021287	0.231649	0	-1.62	0.000408	0.011343	1	-1.25	0.0894	0.420002	0	-1.38	0.01537	0.144984	0	-1.51	0.002286	0.031938	1	-1.61	0.000476	0.008197	1	-1.37	0.017876	0.104925	0	-1.35	0.025223	0.158561	0	2
2	FBgn0030166	CG15251	CG15251	-1.41	0.021404	0.957371	0	-1.15	0.325842	0.968964	0	-1.42	0.029351	0.300486	0	-1.17	0.281142	0.763738	0	-1.35	0.039349	0.3204	0	1.01	0.920403	0.984382	0	-1.35	0.042118	0.27919	0	-1.84	8.6e-05	0.00228	1	-1.67	0.000779	0.01214	1	-1.35	0.043428	0.185117	0	-1.31	0.064485	0.290592	0	2
2	FBgn0033764	CG8776	CG8776	1.16	0.108789	0.999395	0	-1.01	0.918043	0.997504	0	1.05	0.638114	0.903311	0	-1.3	0.006471	0.111334	0	-1.46	0.00016	0.005304	0	-1.23	0.032052	0.230604	0	-1.34	0.002433	0.038883	0	-1.53	2.6e-05	0.000826	1	-1.6	5e-06	0.000161	1	-1.3	0.007082	0.055416	0	-1.42	0.000371	0.005999	0	2
2	FBgn0034588	CG9394	CG9394	1.16	0.132984	0.999395	0	-1.07	0.488926	0.979862	0	-1.3	0.016254	0.216249	0	-1.48	0.000137	0.006534	0	-1.31	0.007689	0.11222	0	-1.22	0.047475	0.293948	0	-1.42	0.000544	0.012138	0	-1.61	7e-06	0.000268	1	-1.59	1e-05	0.000328	1	-1.28	0.013635	0.087685	0	-1.43	0.000487	0.007535	0	2
3	FBgn0046875	Odorant-binding protein 83g	Obp83g	-1.41	0.163727	0.999395	0	1.05	0.823351	0.994557	0	1.08	0.732833	0.933801	0	-1.15	0.476099	0.882696	0	-1.44	0.075893	0.464436	0	-1.37	0.124322	0.499437	0	-1.44	0.075291	0.391204	0	-1.98	0.003057	0.039549	1	-1.95	0.003579	0.039805	1	-1.99	0.059986	0.226002	0	-1.98	0.019333	0.131337	0	3
6	FBgn0030543	CG11585	CG11585	1.07	0.603227	0.999395	0	1.12	0.397663	0.97412	0	1.01	0.946949	0.986731	0	-1.29	0.041945	0.342676	0	1.08	0.51544	0.919299	0	-1.22	0.10362	0.456309	0	-1.14	0.321251	0.749692	0	-1.52	0.002641	0.035601	1	-1.89	1.6e-05	0.000489	1	-1.3	0.052859	0.208722	0	-1.2	0.145581	0.465853	0	6
3	FBgn0052850	CG32850	CG32850	-1.35	0.260088	0.999395	0	1	0.991989	0.998783	0	-1.15	0.607928	0.892727	0	1.08	0.792015	0.96919	0	-1.89	0.018595	0.200844	0	-1.79	0.030709	0.224459	0	-2.31	0.002435	0.038883	1	-1.59	0.08346	0.354415	0	-2.48	0.001068	0.01557	1	-1.98	0.012049	0.080198	0	-1.69	0.052387	0.256996	0	3
6	FBgn0038090	CG10909	CG10909	1.04	0.760129	0.999395	0	1.1	0.479246	0.979862	0	1.25	0.171051	0.607855	0	1.01	0.96021	0.995382	0	-1.08	0.551973	0.926888	0	-1.33	0.033918	0.238936	0	-1.55	0.003198	0.047549	1	-1.32	0.035172	0.213548	0	-1.62	0.000528	0.008924	1	1.07	0.608149	0.810001	0	-1.35	0.023849	0.152401	0	6
7	FBgn0035042	CG3640	CG3640	-1.01	0.915931	0.999395	0	1.01	0.957114	0.99777	0	1.14	0.233666	0.680749	0	1.66	9.8e-05	0.005057	1	1.59	0.000109	0.003898	1	1.59	0.000113	0.003077	1	1.39	0.00467	0.062263	0	1.39	0.004891	0.055737	0	1.52	0.000374	0.006668	1	1.42	0.002415	0.02533	0	1.41	0.002981	0.032877	0	7
7	FBgn0033960	CG10151	CG10151	-1.05	0.772808	0.999395	0	-1.13	0.458429	0.977521	0	1.57	0.009151	0.159332	0	1.5	0.031344	0.291388	0	1.14	0.422217	0.890398	0	1.98	0.000138	0.00361	1	1.26	0.166151	0.571415	0	1.35	0.07398	0.334226	0	1.77	0.00117	0.01679	1	1.27	0.321461	0.589625	0	1.18	0.361743	0.710991	0	7
7	FBgn0027550	CG6495	CG6495	1.17	0.231831	0.999395	0	1.26	0.089039	0.898731	0	1.02	0.890841	0.980922	0	1.43	0.009855	0.144267	0	1.06	0.65366	0.956654	0	1.67	0.000286	0.006672	1	1.43	0.016447	0.151733	0	1.25	0.099014	0.386662	0	1.58	0.001101	0.015951	1	1.03	0.849982	0.938165	0	1.09	0.515257	0.812913	0	7
2	FBgn0004907	14-3-3zeta	14-3-3zeta	-1.15	0.245107	0.999395	0	-1.45	0.00231	0.203832	0	-1.63	9.1e-05	0.006793	1	-1.64	7.5e-05	0.003945	1	-1.77	8e-06	0.000448	1	-1.24	0.071341	0.372461	0	-1.33	0.017157	0.156509	0	-1.48	0.001337	0.021332	0	-1.56	0.000345	0.006198	1	-1.31	0.024747	0.128933	0	-1.45	0.002098	0.02525	0	2
3	FBgn0036203	Mucin 68D	Muc68D	1.09	0.599992	0.999395	0	-1.56	0.011108	0.424476	0	-1.97	0.000179	0.010949	1	-2.34	5e-06	0.000466	1	-2.76	0	1.6e-05	1	-1.17	0.361249	0.781611	0	-1.33	0.098125	0.445268	0	-1.4	0.052706	0.274604	0	-1.69	0.003034	0.035102	1	-1.6	0.007436	0.057394	0	-1.19	0.299307	0.652795	0	3
2	FBgn0029727	CG6978	CG6978	-1.08	0.54322	0.999395	0	-1.29	0.046494	0.753572	0	-1.51	0.001907	0.058994	0	-1.15	0.265598	0.751946	0	-1.57	0.000787	0.01953	1	-1.09	0.507866	0.854435	0	-1.38	0.013393	0.132962	0	-1.05	0.71264	0.899899	0	-1.53	0.00149	0.02029	1	-1.47	0.003581	0.033796	0	-1.4	0.010786	0.084898	0	2
6	FBgn0031858	CG17378	CG17378	1.06	0.661749	0.999395	0	-1.37	0.018998	0.559926	0	1.1	0.425404	0.812074	0	-1.42	0.010008	0.145371	0	-1.61	0.000631	0.01639	1	-1.23	0.090651	0.423158	0	-1.45	0.00629	0.077495	0	1.28	0.063211	0.305145	0	-1.5	0.001247	0.017689	1	-1.21	0.156079	0.400012	0	-1.35	0.045699	0.237059	0	6
2	FBgn0004244	Resistant to dieldrin	Rdl	-1.06	0.737548	0.999395	0	1.01	0.948887	0.99777	0	-1.2	0.329395	0.7583	0	-2.11	0.000791	0.024693	1	-1.22	0.241906	0.77074	0	-1.33	0.137824	0.524673	0	-1.07	0.711031	0.936993	0	-1.53	0.015511	0.127754	0	-1.67	0.004242	0.045111	1	-1.29	0.183791	0.436403	0	-1.53	0.027846	0.170015	0	2
2	FBgn0017645			-1.09	0.536821	0.999395	0	-1.16	0.268152	0.964139	0	-1.27	0.147077	0.580767	0	-1.23	0.26154	0.748456	0	-1.09	0.509656	0.916475	0	-1.18	0.261647	0.696788	0	1.02	0.869383	0.974414	0	-1.41	0.020365	0.151665	0	-1.57	0.002971	0.034597	1	-1.06	0.694303	0.861944	0	-1.07	0.672086	0.887321	0	2
2	FBgn0002985	odd skipped	odd	1.24	0.064296	0.999395	0	-1.14	0.307788	0.968665	0	-1.43	0.002465	0.070904	0	-1.45	0.003753	0.079058	0	-1.42	0.00666	0.101794	0	-1.35	0.009303	0.096826	0	-1.4	0.004059	0.056525	0	-1.16	0.188347	0.531629	0	-1.53	0.000406	0.007139	1	-1.34	0.011779	0.078718	0	-1.17	0.17341	0.506396	0	2
2	FBgn0020623	Peptidyl-alpha-hydroxyglycine-alpha-amidating lyase	Pal	1.02	0.838104	0.999395	0	-1.37	0.001542	0.162151	0	-1.29	0.009669	0.164849	0	-1.43	0.000378	0.014214	0	-1.48	0.000131	0.004532	0	-1.16	0.122021	0.493963	0	-1.2	0.058565	0.337756	0	-1.45	0.000239	0.005236	0	-1.51	5.4e-05	0.001297	1	-1.5	7.9e-05	0.001609	0	-1.28	0.011281	0.087797	0	2
2	FBgn0051015	prolyl-4-hydroxylase-alpha PV	PH4alphaPV	-1.08	0.297317	0.999395	0	-1.19	0.024819	0.60339	0	-1.2	0.020205	0.245696	0	-1.18	0.033785	0.304654	0	-1.21	0.016154	0.183531	0	-1.3	0.000993	0.018056	0	-1.42	1.8e-05	0.000715	0	-1.4	4.4e-05	0.001304	0	-1.5	2e-06	5.9e-05	1	-1.37	0.000124	0.002357	0	-1.29	0.001451	0.018612	0	2
2	FBgn0050497	CG30497	CG30497	1.15	0.095989	0.999395	0	-1.19	0.035931	0.684517	0	-1.21	0.021293	0.252417	0	-1.16	0.130118	0.590394	0	-1.16	0.07494	0.461122	0	-1.36	0.000322	0.007286	0	-1.39	0.00014	0.004036	0	-1.37	0.000247	0.005358	0	-1.52	1.5e-05	0.00045	1	-1.28	0.003235	0.031271	0	-1.35	0.000499	0.007702	0	2
2	FBgn0002938	neither inactivation nor afterpotential C	ninaC	1.1	0.22003	0.999395	0	-1.05	0.551147	0.984159	0	-1.26	0.005415	0.113222	0	-1.47	1.2e-05	0.000914	0	-1.44	2.6e-05	0.001211	0	-1.17	0.054053	0.316393	0	-1.32	0.000817	0.01688	0	-1.33	0.000777	0.013971	0	-1.68	0	9e-06	1	-1.43	3.3e-05	0.000766	0	-1.39	0.000113	0.002313	0	2
2	FBgn0031887	CG11289	CG11289	-1	0.992616	0.999703	0	-1	0.988152	0.998783	0	-1.53	0.043355	0.36058	0	-1.34	0.073551	0.457715	0	-1.32	0.13215	0.605134	0	-1.12	0.495449	0.847912	0	-1.03	0.846551	0.969364	0	-1.43	0.092818	0.375543	0	-1.73	0.003518	0.039321	1	-1.1	0.636236	0.828304	0	-1.55	0.008753	0.072589	0	2
3	FBgn0039444	TweedleD	TwdlD	-1.39	0.046921	0.999395	0	1.12	0.475496	0.979862	0	-1.49	0.015177	0.209946	0	-1.23	0.200455	0.681718	0	-1.47	0.019378	0.205456	0	-1.45	0.024588	0.194006	0	-1.6	0.005076	0.065935	0	-1.61	0.004273	0.050463	0	-1.64	0.003343	0.037822	1	-1.59	0.010927	0.07481	0	-1.58	0.005826	0.053777	0	3
4	FBgn0052648			-1.23	0.258646	0.999395	0	-1.08	0.659568	0.988335	0	-1.14	0.459163	0.833617	0	1.09	0.600736	0.92402	0	1.13	0.472685	0.905544	0	1.18	0.312582	0.742749	0	1.03	0.834407	0.967962	0	1.28	0.170354	0.506868	0	1.77	0.00099	0.014627	1	1.32	0.093846	0.295534	0	1.49	0.049372	0.249208	0	4
4	FBgn0028523	CG5888	CG5888	1.02	0.796833	0.999395	0	-1	0.975105	0.998221	0	1.01	0.868773	0.974426	0	1.28	0.006261	0.109292	0	1.12	0.216372	0.739761	0	1.05	0.560579	0.877218	0	1.17	0.079301	0.401604	0	1.33	0.001979	0.028809	0	1.67	0	1.2e-05	1	1.33	0.001782	0.020079	0	1.41	0.00022	0.003947	0	4
4	FBgn0041111	lilliputian	lilli	-1.11	0.468034	0.999395	0	1.31	0.076935	0.874848	0	1.06	0.6929	0.92104	0	1.06	0.688921	0.94757	0	1.25	0.133384	0.607321	0	1.16	0.328561	0.756514	0	1.06	0.708961	0.936047	0	1.26	0.121823	0.428286	0	1.85	0.000109	0.002328	1	1.38	0.032655	0.153796	0	1.39	0.030417	0.180331	0	4
4	FBgn0051257	CG31257	CG31257	-1.12	0.626907	0.999395	0	1.24	0.357916	0.971264	0	1.18	0.527457	0.861402	0	-1.13	0.604229	0.925962	0	1.1	0.665126	0.958529	0	1.17	0.504887	0.852504	0	-1.27	0.4288	0.820343	0	1.02	0.95608	0.987052	0	2.03	0.003621	0.040179	1	1.1	0.675408	0.851303	0	1.39	0.127015	0.430867	0	4
4	FBgn0016984	skittles	sktl	1.17	0.097848	0.999395	0	1.2	0.049609	0.766283	0	1.15	0.133634	0.567237	0	1.22	0.035357	0.311906	0	1.18	0.085345	0.495925	0	1.11	0.270625	0.704289	0	1.28	0.018043	0.160327	0	1.16	0.118327	0.42152	0	1.5	4.7e-05	0.001157	1	1.37	0.001122	0.013925	0	1.37	0.001114	0.015024	0	4
4	FBgn0036946	CG32223	CG32223	-1	0.984107	0.999703	0	1.16	0.380713	0.97412	0	-1.16	0.37537	0.783983	0	1.13	0.453794	0.869687	0	1.16	0.367146	0.866395	0	1	0.983255	0.996339	0	1.21	0.266088	0.697277	0	1.18	0.313711	0.666655	0	2.11	3.7e-05	0.000959	1	1.48	0.021319	0.116961	0	1.37	0.063664	0.288374	0	4
4	FBgn0034278	CG14488	CG14488	1.31	0.03041	0.964922	0	1.23	0.037211	0.695651	0	1.02	0.886765	0.979572	0	1.42	0.012963	0.172471	0	1.13	0.262661	0.794631	0	1.01	0.922714	0.984906	0	1.19	0.110023	0.471706	0	1.12	0.352558	0.699529	0	1.51	0.000315	0.005776	1	-1	0.980524	0.993677	0	1.36	0.006726	0.059779	0	4
4	FBgn0052135	CG32135	CG32135	1	0.959452	0.999703	0	1.07	0.387741	0.97412	0	1.06	0.469601	0.837641	0	1.05	0.545139	0.907699	0	1.12	0.218762	0.74248	0	1.03	0.691101	0.924103	0	1.24	0.013485	0.133476	0	1.36	0.00051	0.009886	0	1.61	0	1.8e-05	1	1.39	0.000184	0.003265	0	1.36	0.000549	0.008319	0	4
4	FBgn0003459	stonewall	stwl	-1.07	0.769614	0.999395	0	1.08	0.718755	0.988335	0	1.02	0.934909	0.986316	0	1.21	0.374315	0.828067	0	-1.03	0.903403	0.98988	0	1.19	0.41506	0.81596	0	1.29	0.244256	0.674526	0	1.06	0.775143	0.925862	0	1.9	0.004545	0.047454	1	1.56	0.044165	0.186792	0	1.35	0.171063	0.502822	0	4
4	FBgn0028902	Tektin A	Tektin-A	1.02	0.851306	0.999395	0	-1.03	0.771708	0.990997	0	1.48	0.003135	0.081287	0	1.06	0.597169	0.923406	0	1.06	0.624873	0.947671	0	1.18	0.168926	0.577846	0	1.04	0.763161	0.951777	0	1.2	0.124761	0.432826	0	1.52	0.001865	0.024259	1	-1.06	0.660042	0.841701	0	1.31	0.036333	0.204078	0	4
4	FBgn0053171			-1.09	0.452612	0.999395	0	-1.08	0.514444	0.981307	0	1.1	0.454686	0.829888	0	1.01	0.927153	0.992574	0	-1.09	0.457069	0.903502	0	1.2	0.1214	0.492531	0	1.23	0.07485	0.390282	0	1.04	0.730749	0.907224	0	1.62	0.000105	0.002266	1	1.23	0.074731	0.25723	0	1.31	0.024361	0.155	0	4
4	FBgn0051653			-1.01	0.960389	0.999703	0	1.06	0.611507	0.988335	0	1.19	0.124007	0.552971	0	1.23	0.101568	0.531998	0	-1.05	0.666715	0.958529	0	-1.02	0.843785	0.965535	0	1.32	0.017105	0.156252	0	1.29	0.026362	0.177983	0	1.65	4.1e-05	0.001048	1	1.23	0.093346	0.294562	0	1.3	0.023272	0.149734	0	4
4	FBgn0033107	klaroid	koi	-1.1	0.484607	0.999395	0	1.09	0.54579	0.984159	0	1.13	0.381931	0.787617	0	1.08	0.583745	0.920819	0	1.08	0.59015	0.939019	0	1.04	0.765473	0.945636	0	1.16	0.281048	0.713937	0	1.24	0.129873	0.442224	0	1.71	0.00029	0.005392	1	1.45	0.01063	0.073469	0	1.3	0.065158	0.292486	0	4
4	FBgn0015270	Origin recognition complex subunit 2	Orc2	1.06	0.572088	0.999395	0	1.08	0.449968	0.976335	0	1.13	0.238492	0.685692	0	1.13	0.216275	0.70144	0	1.18	0.099756	0.535234	0	1.09	0.390728	0.801529	0	1.1	0.340825	0.763061	0	1.16	0.152632	0.478398	0	1.51	0.000152	0.003102	1	1.5	0.000186	0.003279	0	1.29	0.014569	0.106811	0	4
4	FBgn0035861	CG7213	CG7213	1.13	0.525324	0.999395	0	1.02	0.894836	0.997504	0	-1.23	0.268727	0.715065	0	1.37	0.066445	0.432602	0	1.29	0.139153	0.617544	0	1.54	0.023686	0.189504	0	1.2	0.277366	0.710513	0	-1.11	0.576865	0.83993	0	1.81	0.000914	0.013711	1	1.61	0.006912	0.054501	0	1.27	0.165342	0.494151	0	4
4	FBgn0053231	CG33231	CG33231	1.17	0.274692	0.999395	0	-1.09	0.552287	0.984159	0	1.01	0.940572	0.986316	0	1.07	0.641881	0.935964	0	1.07	0.620314	0.947592	0	-1.09	0.531867	0.863923	0	1.02	0.87355	0.975293	0	1.01	0.942904	0.984534	0	1.53	0.00425	0.045131	1	-1.08	0.595636	0.803257	0	1.26	0.10522	0.388612	0	4
4	FBgn0011692	pavarotti	pav	1.02	0.903767	0.999395	0	1.13	0.486674	0.979862	0	1.06	0.727479	0.932109	0	1.11	0.539707	0.906986	0	1.11	0.540181	0.924097	0	1.06	0.746831	0.939842	0	1.25	0.191295	0.612969	0	1.27	0.164152	0.497759	0	1.69	0.002957	0.034457	1	1.55	0.012132	0.080461	0	1.26	0.184836	0.521499	0	4
4	FBgn0010194	Wnt oncogene analog 5	Wnt5	1.19	0.228024	0.999395	0	1.22	0.166158	0.949455	0	1.3	0.101839	0.513886	0	-1.04	0.780245	0.966768	0	1.02	0.922505	0.991117	0	-1.08	0.575589	0.882279	0	1.11	0.460885	0.840969	0	1.33	0.071935	0.329015	0	1.68	0.000657	0.010705	1	1.35	0.06039	0.226808	0	1.25	0.275768	0.628098	0	4
4	FBgn0038860	CG10825	CG10825	-1.05	0.696417	0.999395	0	1.12	0.374047	0.972841	0	1.22	0.13484	0.567682	0	1.15	0.284518	0.767335	0	1.13	0.342013	0.853121	0	1	0.982495	0.996286	0	1.07	0.586017	0.897772	0	1.17	0.263989	0.616257	0	1.65	0.000269	0.005043	1	1.21	0.143767	0.380927	0	1.24	0.107721	0.393661	0	4
4	FBgn0037415	Osiris 8	Osi8	1.05	0.85145	0.999395	0	1.17	0.55199	0.984159	0	1.18	0.409994	0.802942	0	-1.16	0.516831	0.899	0	1.17	0.386076	0.8737	0	1.26	0.256004	0.694136	0	1.54	0.021871	0.182241	0	1.12	0.724728	0.905661	0	1.76	0.003369	0.038018	1	1.01	0.962173	0.98695	0	1.23	0.256074	0.609654	0	4
4	FBgn0030987			1.2	0.036755	0.999395	0	1.23	0.019759	0.572107	0	1.17	0.07333	0.456619	0	-1.14	0.126835	0.583802	0	1.18	0.0835	0.490043	0	1.1	0.264538	0.699355	0	1.42	0.000533	0.01197	0	1.17	0.069715	0.323874	0	1.57	2e-06	8.8e-05	1	1.07	0.407041	0.666891	0	1.22	0.024861	0.157226	0	4
4	FBgn0036770	Prestin	Prestin	1.07	0.575979	0.999395	0	1.02	0.889968	0.997504	0	1.16	0.234918	0.682432	0	1.12	0.352547	0.813102	0	1.09	0.495316	0.912147	0	1.11	0.39309	0.803037	0	1.06	0.619214	0.908357	0	1.11	0.393854	0.732354	0	1.54	0.001038	0.015199	1	1.38	0.012065	0.080223	0	1.21	0.126015	0.429008	0	4
4	FBgn0039079	Ionotropic receptor 94g	Ir94g	1.19	0.341078	0.999395	0	-1.04	0.838271	0.995427	0	1.46	0.044236	0.364106	0	1.13	0.483781	0.884	0	1.13	0.469656	0.904293	0	1.11	0.550013	0.871632	0	1.17	0.403358	0.802235	0	1.49	0.036368	0.217796	0	1.74	0.00424	0.045111	1	1.21	0.269963	0.540053	0	1.21	0.266727	0.617493	0	4
4	FBgn0031414	eyes shut	eys	1.03	0.827604	0.999395	0	-1.05	0.695118	0.988335	0	1.03	0.793175	0.951653	0	-1.04	0.755864	0.962961	0	1.13	0.34948	0.858135	0	1.09	0.488549	0.845197	0	-1.08	0.544142	0.882184	0	1.21	0.190759	0.534569	0	1.57	0.002501	0.030527	1	1.18	0.201921	0.460964	0	1.2	0.172095	0.504164	0	4
4	FBgn0010303	hemipterous	hep	1.09	0.52708	0.999395	0	-1.07	0.612223	0.988335	0	-1.2	0.178225	0.617155	0	1.14	0.355586	0.816322	0	1.17	0.257163	0.78871	0	-1.01	0.923248	0.984906	0	1.12	0.452455	0.836213	0	1.22	0.192948	0.537357	0	1.6	0.001125	0.016253	1	1.27	0.086686	0.281692	0	1.18	0.22774	0.577882	0	4
4	FBgn0033720	CG13160	CG13160	-1.09	0.363292	0.999395	0	-1.07	0.535448	0.984159	0	-1.07	0.517688	0.857127	0	1.07	0.522946	0.901407	0	1.06	0.57731	0.935422	0	1.1	0.333796	0.760179	0	1.1	0.351334	0.768746	0	-1.06	0.569209	0.835503	0	1.52	8.2e-05	0.001825	1	1.25	0.025594	0.131675	0	1.17	0.11422	0.406999	0	4
4	FBgn0053546			1.02	0.91079	0.999395	0	-1.05	0.698387	0.988335	0	-1.05	0.738492	0.935374	0	1.23	0.121706	0.573492	0	1.13	0.350609	0.858135	0	1.07	0.600492	0.892218	0	1.03	0.828825	0.966679	0	1.14	0.338113	0.68939	0	1.55	0.001717	0.022747	1	1.3	0.055432	0.21494	0	1.16	0.271468	0.622766	0	4
4	FBgn0033736	CG13154	CG13154	-1.12	0.563709	0.999395	0	-1.23	0.256161	0.964139	0	-1.16	0.451437	0.82807	0	1.58	0.022134	0.237483	0	1.2	0.315832	0.83786	0	1.1	0.627085	0.901788	0	-1.11	0.554082	0.885558	0	-1.04	0.829439	0.947837	0	2.04	0.001834	0.023962	1	1.01	0.943819	0.979526	0	1.14	0.562171	0.836793	0	4
4	FBgn0030812	CG8949	CG8949	1.04	0.836747	0.999395	0	1.06	0.752226	0.989815	0	1.11	0.561969	0.876181	0	1.21	0.292463	0.773159	0	1.25	0.211462	0.73478	0	-1.06	0.765756	0.945684	0	1.21	0.295131	0.727763	0	1.32	0.127282	0.437417	0	1.86	0.000998	0.014705	1	1.55	0.017842	0.104796	0	1.14	0.479603	0.795004	0	4
4	FBgn0051630	CG31630	CG31630	-1.28	0.177255	0.999395	0	1.12	0.533848	0.984134	0	-1.57	0.016234	0.216249	0	1.31	0.14657	0.617699	0	1.21	0.305925	0.830842	0	1.34	0.11304	0.475187	0	1.1	0.624414	0.909692	0	1.39	0.104754	0.396712	0	1.82	0.001746	0.023049	1	1.2	0.357733	0.623652	0	1.13	0.506934	0.807885	0	4
4	FBgn0036955			-1.28	0.149113	0.999395	0	1.06	0.741817	0.989815	0	1.09	0.652259	0.907855	0	1.16	0.378606	0.830116	0	1.19	0.315253	0.83786	0	1.03	0.850187	0.967694	0	1.19	0.316888	0.746363	0	1.09	0.657808	0.878171	0	1.71	0.002426	0.029745	1	1.35	0.109044	0.322688	0	1.12	0.509952	0.809776	0	4
4	FBgn0035008	CG3494	CG3494	1.23	0.23524	0.999395	0	1.01	0.966741	0.99777	0	1.18	0.334856	0.76162	0	-1.03	0.86372	0.981571	0	1.06	0.737226	0.970795	0	1.02	0.89693	0.979248	0	1.03	0.884632	0.977062	0	1.18	0.351625	0.69852	0	2.11	7.5e-05	0.001692	1	-1	0.988242	0.995817	0	1.09	0.606298	0.857223	0	4
4	FBgn0028838	COP9 complex homolog subunit 1 a	CSN1a	1.07	0.690685	0.999395	0	-1.1	0.574723	0.985816	0	1.1	0.568842	0.878357	0	-1.01	0.956592	0.995382	0	1.14	0.43371	0.893166	0	-1.03	0.874654	0.972805	0	-1.12	0.536651	0.879891	0	1.24	0.189258	0.533026	0	1.73	0.001473	0.020178	1	1.04	0.791692	0.912236	0	1.07	0.687012	0.893969	0	4
4	FBgn0051287	CG31287	CG31287	-1.56	0.228726	0.999395	0	1.49	0.030384	0.643145	0	-1.21	0.349854	0.769098	0	1.85	0.005852	0.105951	0	1.05	0.843097	0.985024	0	1.25	0.205665	0.634453	0	1.18	0.495617	0.858608	0	-1.28	0.231221	0.58113	0	-1.68	0.003527	0.03939	1	1.7	0.045096	0.188745	0	1.06	0.760229	0.922615	0	4
4	FBgn0052391	CG32391	CG32391	-1.01	0.968178	0.999703	0	1.25	0.215459	0.957756	0	1.06	0.732009	0.93364	0	1.17	0.426264	0.855489	0	-1.01	0.945005	0.99213	0	1.09	0.623834	0.900062	0	1.2	0.316235	0.745902	0	1.17	0.491742	0.794533	0	1.7	0.004799	0.049502	1	-1.23	0.292735	0.563398	0	1.06	0.793019	0.93416	0	4
4	FBgn0031945	CG7191	CG7191	-1.13	0.406944	0.999395	0	-1.21	0.1851	0.956671	0	-1.15	0.389381	0.79154	0	-1.14	0.409135	0.844826	0	1.01	0.937891	0.991908	0	-1.15	0.564548	0.878076	0	-1.14	0.371077	0.781098	0	-1.03	0.866296	0.961519	0	1.65	0.000974	0.014453	1	1.16	0.291153	0.561338	0	1.05	0.753364	0.919821	0	4
4	FBgn0000451	ectodermal	ect	1.22	0.15917	0.999395	0	-1.12	0.464974	0.977997	0	1.16	0.29288	0.731529	0	1.2	0.20634	0.691042	0	1.28	0.08456	0.492412	0	1.02	0.877262	0.973704	0	1.11	0.45082	0.835122	0	1.34	0.040823	0.234844	0	1.53	0.003638	0.040326	1	1.17	0.273586	0.544624	0	1.02	0.893777	0.969296	0	4
4	FBgn0038003	CG3916	CG3916	-1.08	0.673191	0.999395	0	-1.23	0.263427	0.964139	0	-1.2	0.331382	0.760069	0	1.02	0.914544	0.990273	0	-1.11	0.566796	0.932848	0	1.25	0.224245	0.656164	0	1.07	0.716031	0.938977	0	-1.01	0.950385	0.985319	0	1.82	0.001886	0.024448	1	-1.08	0.680355	0.854262	0	1.02	0.916714	0.974306	0	4
4	FBgn0051394	CG31394	CG31394	1.27	0.028342	0.964922	0	1.14	0.269303	0.964139	0	1.14	0.218297	0.665615	0	1.04	0.683153	0.946164	0	1.15	0.193459	0.708451	0	1.04	0.706658	0.92899	0	1.1	0.371135	0.781098	0	1.2	0.091931	0.374126	0	1.58	7.2e-05	0.001648	1	-1.03	0.861025	0.943889	0	-1.01	0.957633	0.98909	0	4
4	FBgn0029987	CG15330	CG15330	1.29	0.024986	0.964922	0	-1.13	0.327648	0.968964	0	1.26	0.043626	0.361122	0	-1.03	0.79591	0.969442	0	1.31	0.019078	0.203726	0	1.05	0.645642	0.907989	0	1.25	0.074033	0.387739	0	1.29	0.025497	0.174124	0	1.53	0.000368	0.006597	1	-1.02	0.835491	0.93048	0	-1.01	0.935757	0.981348	0	4
4	FBgn0051064	CG31064	CG31064	1.09	0.524328	0.999395	0	1.17	0.216429	0.957756	0	1.06	0.658148	0.910536	0	-1.12	0.425527	0.854927	0	-1.09	0.5375	0.924097	0	-1.11	0.447002	0.828499	0	-1.13	0.373688	0.783916	0	1.14	0.373551	0.716836	0	1.51	0.002018	0.025775	1	-1.04	0.782461	0.907326	0	-1.04	0.781723	0.930479	0	4
4	FBgn0051314	Neu3	Neu3	1.22	0.290434	0.999395	0	1.05	0.821949	0.994557	0	-1.02	0.929094	0.986316	0	1.32	0.138877	0.606249	0	1.12	0.587083	0.938589	0	1.32	0.13331	0.516311	0	1.09	0.626752	0.910141	0	1.15	0.49318	0.794687	0	1.89	0.002625	0.031573	1	1.16	0.501381	0.739947	0	-1.08	0.809616	0.939934	0	4
4	FBgn0038120			-1.28	0.065577	0.999395	0	1.03	0.826567	0.994557	0	1.11	0.418126	0.807224	0	-1.06	0.651304	0.938881	0	1.04	0.762172	0.974864	0	1.2	0.178801	0.59276	0	1.02	0.862853	0.973079	0	-1.08	0.544587	0.824139	0	1.5	0.003408	0.038352	1	1.24	0.109843	0.32396	0	-1.11	0.4421	0.771358	0	4
5	FBgn0030994	CG14193	CG14193	1.05	0.90508	0.999395	0	-1.19	0.740113	0.9893	0	2.03	0.061424	0.425626	0	2.1	0.029159	0.277941	0	2.31	0.112632	0.565308	0	2.6	0.006755	0.076806	0	2.67	0.004926	0.064755	0	3.22	0.010636	0.097976	0	3.42	0.000567	0.009517	1	2.04	0.022252	0.120521	0	2.58	0.006341	0.057008	0	5
6	FBgn0004244	Resistant to dieldrin	Rdl	-1.01	0.973592	0.999703	0	1.18	0.51876	0.981307	0	-1.03	0.915033	0.985648	0	-1.49	0.123578	0.576448	0	-1.14	0.611486	0.94442	0	-1.03	0.897259	0.979248	0	1.02	0.942293	0.98782	0	-1	0.989058	0.99709	0	-2.34	0.001539	0.020807	1	1.2	0.471427	0.716846	0	1.06	0.811929	0.941082	0	6
6	FBgn0033164	CG11112	CG11112	-1.44	0.210658	0.999395	0	1.04	0.876338	0.997504	0	1.69	0.072429	0.454667	0	1.02	0.939736	0.994163	0	1.13	0.574667	0.935166	0	-1.01	0.955444	0.989156	0	-1.04	0.864413	0.973252	0	-1.12	0.647213	0.873579	0	-2.18	0.003092	0.035564	1	-1.01	0.971012	0.991158	0	1.05	0.855735	0.955066	0	6
6	FBgn0032669	CG15155	CG15155	1.22	0.195702	0.999395	0	1.13	0.404793	0.97412	0	1.14	0.395277	0.795213	0	-1.49	0.018336	0.213484	0	-1.43	0.019819	0.207839	0	-1.15	0.368188	0.784264	0	-1.12	0.46219	0.841535	0	-1.19	0.255685	0.607602	0	-1.63	0.001844	0.024069	1	-1.42	0.022614	0.121631	0	-1.1	0.524374	0.818612	0	6
6	FBgn0035041	CG13594	CG13594	-1.05	0.757756	0.999395	0	-1.16	0.430516	0.974172	0	1.12	0.492798	0.846917	0	-1.39	0.136861	0.601469	0	1.41	0.074306	0.458786	0	-1.04	0.797294	0.9542	0	-1.18	0.325922	0.753737	0	1.05	0.867715	0.962055	0	-2.6	0.000984	0.01455	1	1.05	0.773628	0.902573	0	-1.12	0.511973	0.811608	0	6
6	FBgn0025720	Ate1	Ate1	1.21	0.116271	0.999395	0	1.01	0.945862	0.99777	0	1.08	0.5291	0.861989	0	-1.25	0.097689	0.523492	0	-1.36	0.012983	0.158906	0	1.06	0.634877	0.903677	0	-1.12	0.380113	0.78823	0	-1.05	0.71322	0.899927	0	-1.56	0.000462	0.007976	1	-1.23	0.116272	0.334955	0	-1.15	0.239752	0.590841	0	6
6	FBgn0032637	CG5050	CG5050	-1.28	0.177999	0.999395	0	1.11	0.611634	0.988335	0	-1.4	0.074476	0.458708	0	-1.22	0.404251	0.84246	0	-1.58	0.275142	0.809337	0	1.24	0.28855	0.718097	0	1.31	0.192549	0.614186	0	1.32	0.179928	0.520387	0	-2.04	0.004629	0.048066	1	1.08	0.782665	0.907385	0	-1.19	0.401908	0.743467	0	6
6	FBgn0035548	CG15023	CG15023	-1.17	0.251133	0.999395	0	1.04	0.749778	0.989815	0	1.12	0.408079	0.801585	0	-1.17	0.244855	0.734742	0	-1.11	0.421619	0.890146	0	1.16	0.316309	0.745542	0	-1.3	0.052791	0.316662	0	-1.14	0.324531	0.675927	0	-1.59	0.000973	0.014453	1	-1.27	0.080799	0.270776	0	-1.3	0.051069	0.253417	0	6
6	FBgn0029863	CG3823	CG3823	1.15	0.151556	0.999395	0	-1.01	0.953131	0.99777	0	-1.18	0.090298	0.49519	0	-1.28	0.024391	0.252001	0	-1.22	0.041343	0.329768	0	-1.07	0.477076	0.840582	0	-1.1	0.304335	0.733812	0	-1.23	0.03636	0.217796	0	-1.52	5.3e-05	0.00128	1	-1.38	0.001392	0.01665	0	-1.35	0.002936	0.032473	0	6
6	FBgn0036321	CG14120	CG14120	-1.02	0.859639	0.999395	0	-1.14	0.358666	0.971784	0	1.05	0.699635	0.923309	0	1.17	0.254644	0.742871	0	-1.27	0.060742	0.412635	0	-1.06	0.647748	0.908298	0	-1.18	0.190463	0.612015	0	-1.26	0.069243	0.322854	0	-1.53	0.001212	0.0173	1	-1.49	0.002423	0.025343	0	-1.46	0.003837	0.038943	0	6
6	FBgn0037436	Hormone receptor 83	Hr83	1.23	0.186381	0.999395	0	-1.45	0.021955	0.586776	0	1.03	0.841103	0.968173	0	-1.04	0.805244	0.971273	0	-1.27	0.132621	0.605525	0	-1.25	0.166067	0.574311	0	-1.45	0.022074	0.183302	0	-1.27	0.138754	0.456894	0	-1.62	0.003056	0.035239	1	-1.55	0.006712	0.053344	0	-1.48	0.015627	0.112066	0	6
6	FBgn0035669	CG6592	CG6592	1.3	0.023363	0.957371	0	-1.05	0.670852	0.988335	0	1.1	0.377181	0.785109	0	-1.25	0.047296	0.362792	0	-1.13	0.290753	0.819281	0	-1.16	0.176366	0.588856	0	-1.08	0.476186	0.851008	0	-1.2	0.100534	0.389484	0	-1.61	7.2e-05	0.001642	1	-1.15	0.223908	0.48778	0	-1.48	0.000801	0.011414	0	6
6	FBgn0038554	tincar	tinc	-1.17	0.313058	0.999395	0	1.02	0.929236	0.997504	0	-1.2	0.293317	0.73204	0	1.26	0.179537	0.661533	0	-1.01	0.946255	0.992337	0	1.15	0.417526	0.81596	0	-1.21	0.270064	0.700335	0	-1.03	0.927728	0.979753	0	-2.24	0.000186	0.003718	1	1.06	0.810614	0.918259	0	-1.54	0.116514	0.410941	0	6
6	FBgn0037283	CG14658	CG14658	-1.15	0.419792	0.999395	0	-1	0.977452	0.998244	0	1.16	0.385173	0.789259	0	1.07	0.677927	0.945886	0	-1.17	0.317182	0.838681	0	-1.19	0.256221	0.694255	0	1	0.999147	0.999614	0	-1.39	0.053095	0.276192	0	-1.66	0.004186	0.044774	1	-1.19	0.260883	0.529458	0	-1.56	0.010814	0.084964	0	6
6	FBgn0029667	Growth arrest specific protein 8	Gas8	-1.21	0.624292	0.999395	0	-1.76	0.373672	0.972321	0	1.05	0.89142	0.980936	0	1.13	0.849246	0.981041	0	1.1	0.797742	0.977678	0	-1.22	0.612816	0.896586	0	-1.23	0.504575	0.863625	0	1.26	0.529833	0.816585	0	-3.21	0.004328	0.045738	1	1.3	0.483917	0.725076	0	-1.79	0.127534	0.43196	0	6
7	FBgn0028545			-1.02	0.896127	0.999395	0	-1.06	0.689856	0.988335	0	1.13	0.46901	0.837621	0	1.18	0.261815	0.748816	0	1.17	0.289528	0.818726	0	1.22	0.225777	0.657036	0	1.14	0.414344	0.808648	0	1.02	0.913127	0.975156	0	1.92	5.4e-05	0.001293	1	1.51	0.007845	0.059564	0	1.53	0.00607	0.055333	0	7
7	FBgn0002643	mastermind	mam	-1.06	0.706862	0.999395	0	1.35	0.103001	0.916685	0	1.18	0.368243	0.781268	0	1.06	0.786475	0.967903	0	1.25	0.231085	0.756796	0	1.26	0.172889	0.583201	0	1.42	0.05996	0.343119	0	1.59	0.026128	0.176821	0	2.1	0.000652	0.01068	1	1.62	0.011201	0.076207	0	1.51	0.016638	0.11727	0	7
7	FBgn0020641	Lcp65Ad	Lcp65Ad	1.46	0.09511	0.999395	0	1.26	0.298525	0.968665	0	1.13	0.546929	0.87022	0	1.38	0.115134	0.560488	0	1.61	0.021415	0.217412	0	1.08	0.789838	0.952778	0	1.35	0.145714	0.537585	0	1.69	0.021809	0.15795	0	3.22	0.001492	0.020301	1	1.2	0.360465	0.625975	0	1.44	0.078034	0.325742	0	7
7	FBgn0038832	CG15695	CG15695	1.14	0.369828	0.999395	0	1.46	0.009445	0.392912	0	-1.1	0.482185	0.843935	0	1.19	0.229617	0.716333	0	1.4	0.019325	0.205357	0	1.29	0.079152	0.392329	0	1.27	0.092485	0.434755	0	1.13	0.445289	0.765396	0	2.37	0	5e-06	1	1.1	0.490338	0.730864	0	1.37	0.044076	0.231199	0	7
7	FBgn0004101	blistered	bs	1.36	0.040881	0.999395	0	1.2	0.225887	0.958634	0	1.16	0.30552	0.739755	0	1.4	0.025298	0.257982	0	1.17	0.284621	0.816431	0	1.23	0.170657	0.580496	0	1.04	0.805646	0.961241	0	1.27	0.11128	0.407233	0	1.59	0.00251	0.030563	1	1.47	0.010621	0.073442	0	1.32	0.060942	0.281277	0	7
7	FBgn0040834			1.02	0.937505	0.999703	0	1.07	0.748784	0.989815	0	1.15	0.46457	0.835971	0	1.22	0.25335	0.742687	0	1.35	0.149753	0.635413	0	1.13	0.466029	0.835943	0	1.25	0.189833	0.610857	0	-1	0.998427	0.99972	0	2.23	2.1e-05	0.000599	1	1.73	0.010887	0.074617	0	1.32	0.189177	0.527969	0	7
7	FBgn0038649	CG7718	CG7718	-1.07	0.620189	0.999395	0	1.04	0.777121	0.991978	0	1.08	0.602369	0.891448	0	1.26	0.108057	0.544188	0	1.24	0.145216	0.627881	0	1.17	0.282572	0.714235	0	1.29	0.080346	0.404188	0	1.28	0.121913	0.428489	0	1.62	0.00131	0.018395	1	1.42	0.018238	0.10617	0	1.31	0.065285	0.29289	0	7
7	FBgn0001987	Gliotactin	Gli	1.03	0.791491	0.999395	0	1.16	0.195227	0.957756	0	1.06	0.642978	0.904436	0	1.1	0.498104	0.890963	0	1.02	0.837691	0.984857	0	1.42	0.003197	0.044102	0	1.16	0.18904	0.609134	0	1.24	0.066614	0.315419	0	1.84	9e-06	0.000282	1	1.42	0.003179	0.030863	0	1.31	0.021517	0.14163	0	7
7	FBgn0030293	CG1737	CG1737	1.09	0.422105	0.999395	0	1.18	0.122252	0.928836	0	1.11	0.333405	0.760745	0	1.17	0.150008	0.622429	0	1.21	0.073315	0.455234	0	1.2	0.090508	0.423031	0	1.38	0.003656	0.052292	0	1.41	0.001726	0.026016	0	1.53	0.000147	0.003023	1	1.3	0.0153	0.095091	0	1.3	0.014994	0.108934	0	7
7	FBgn0033273	CG2183	CG2183	-1.03	0.739951	0.999395	0	1.04	0.667916	0.988335	0	1.1	0.351793	0.770206	0	1.22	0.049016	0.369326	0	1.26	0.021785	0.218594	0	1.27	0.01802	0.157284	0	1.43	0.000627	0.013506	0	1.4	0.00126	0.020381	0	1.52	7.5e-05	0.001692	1	1.47	0.000251	0.004205	0	1.21	0.063696	0.288418	0	7
7	FBgn0036859	CG14085	CG14085	1.17	0.185183	0.999395	0	-1.02	0.878014	0.997504	0	1.13	0.298813	0.735412	0	1.49	0.001531	0.04098	0	1.15	0.237474	0.765562	0	1.1	0.439015	0.825648	0	1.27	0.052805	0.316662	0	1.49	0.003632	0.045002	0	1.94	1e-06	4e-05	1	1.28	0.044858	0.188547	0	1.15	0.264315	0.616015	0	7
7	FBgn0034957	CG3121	CG3121	-1.1	0.558027	0.999395	0	-1.2	0.356831	0.971264	0	-1.02	0.893027	0.981082	0	1.58	0.106623	0.541407	0	1.07	0.699227	0.963476	0	1.74	0.006854	0.077401	0	1.6	0.010331	0.110673	0	1.37	0.081995	0.352115	0	1.78	0.002055	0.026124	1	1.06	0.725425	0.878134	0	1.02	0.938548	0.982621	0	7
2	FBgn0034072	Dystroglycan	Dg	-1.2	0.066072	0.999395	0	-1.3	0.007439	0.362146	0	-1.3	0.014972	0.207607	0	-1.09	0.393667	0.836734	0	-1.5	7.8e-05	0.003002	1	-1.59	1e-05	0.000389	1	-1.64	4e-06	0.000173	1	-1.78	1e-06	5.4e-05	1	-1.46	0.000197	0.003889	0	-1.38	0.001409	0.016786	0	-1.45	0.00029	0.004936	0	2
7	FBgn0019928	Ser8	Ser8	-1.02	0.920338	0.999703	0	1.09	0.6035	0.988335	0	1.42	0.025526	0.276701	0	1.65	0.001771	0.046095	1	1.45	0.018731	0.20135	0	1.95	5.1e-05	0.001566	1	1.89	0.000111	0.003328	1	2.06	1.6e-05	0.000529	1	1.19	0.258947	0.55422	0	-1.1	0.539093	0.767671	0	1.12	0.460003	0.782183	0	7
5	FBgn0032281	CG17107	CG17107	1.16	0.48255	0.999395	0	1.65	0.023668	0.591526	0	2.3	0.000294	0.016399	1	1.72	0.02487	0.254806	0	1.81	0.007923	0.114449	0	2.34	0.000224	0.005429	1	2.18	0.000623	0.013437	1	2.71	2.2e-05	0.000726	1	1.39	0.135112	0.390426	0	-1.08	0.736764	0.883854	0	1.39	0.128848	0.434954	0	5
7	FBgn0053346	CG33346	CG33346	1.07	0.682894	0.999395	0	1.16	0.368517	0.972321	0	1.81	0.000812	0.032658	1	1.37	0.063892	0.423745	0	1.2	0.283085	0.815748	0	1.77	0.001194	0.020868	1	1.76	0.001365	0.02525	1	1.67	0.003301	0.041729	1	1.37	0.063312	0.257736	0	-1.15	0.419264	0.677304	0	1.24	0.198859	0.54334	0	7
2	FBgn0036390	CG13738	CG13738	-1.2	0.183102	0.999395	0	-1.03	0.834204	0.995254	0	-1.5	0.003711	0.090604	0	-1.14	0.315486	0.792552	0	-1.42	0.010107	0.13407	0	-1.71	0.000158	0.00407	1	-1.55	0.001605	0.028634	1	-1.7	0.000196	0.004447	1	-1.4	0.0148	0.104835	0	-1.29	0.059114	0.224009	0	-1.3	0.054435	0.264069	0	2
7	FBgn0033970	CG10205	CG10205	1.23	0.230736	0.999395	0	1.24	0.221274	0.957756	0	1.57	0.011574	0.181116	0	1.42	0.046466	0.359535	0	1.54	0.016	0.183133	0	2.31	1e-05	0.000399	1	1.82	0.001024	0.020343	1	1.69	0.003759	0.046051	1	1.58	0.010289	0.08257	0	1.2	0.298943	0.569014	0	1.64	0.006214	0.056257	0	7
7	FBgn0033821	CG10799	CG10799	-1.02	0.909242	0.999395	0	1.39	0.065548	0.845568	0	1.77	0.001794	0.057225	0	1.52	0.019356	0.219908	0	1.41	0.055722	0.391068	0	1.99	0.00022	0.00534	1	2.06	0.000108	0.003249	1	1.91	0.000442	0.008783	1	1.32	0.119632	0.366095	0	1.16	0.40143	0.661335	0	1.62	0.007563	0.065449	0	7
7	FBgn0025692	CG3814	CG3814	-1.01	0.932264	0.999703	0	1.29	0.098524	0.912799	0	1.41	0.026949	0.287818	0	1.3	0.084577	0.490413	0	1.29	0.101993	0.54075	0	2.04	1.6e-05	0.000574	1	1.85	0.000146	0.004172	1	1.81	0.00022	0.004899	1	1.41	0.025327	0.148232	0	1.08	0.607376	0.809979	0	1.51	0.008829	0.07308	0	7
7	FBgn0034470	Odorant-binding protein 56d	Obp56d	1.11	0.510297	0.999395	0	1.26	0.156999	0.949363	0	1.22	0.222662	0.669768	0	1.21	0.234831	0.722265	0	1.35	0.071419	0.448092	0	1.69	0.001962	0.030553	1	1.65	0.003062	0.046088	1	1.62	0.00407	0.048632	1	1.31	0.103189	0.339106	0	1.18	0.301962	0.571684	0	1.49	0.017464	0.121527	0	7
7	FBgn0052054	CG32054	CG32054	1.2	0.032494	0.971141	0	1.23	0.018355	0.550991	0	1.38	0.000352	0.01834	0	1.27	0.007514	0.123151	0	1.26	0.008227	0.117034	0	1.7	0	5e-06	1	1.51	9e-06	0.000371	1	1.6	1e-06	4.1e-05	1	1.28	0.005558	0.055142	0	1.27	0.006859	0.054285	0	1.48	2.2e-05	0.000582	0	7
7	FBgn0040582	CG5791	CG5791	-1.19	0.169174	0.999395	0	-1.13	0.344133	0.969629	0	-1.02	0.88179	0.978874	0	1.22	0.158351	0.631879	0	1.38	0.014479	0.171622	0	1.5	0.002336	0.034927	1	1.66	0.000214	0.005677	1	1.91	5e-06	0.000181	1	1.31	0.037732	0.190837	0	1.1	0.469545	0.715365	0	1.47	0.003636	0.037543	0	7
7	FBgn0035089	Pherokine 3	Phk-3	-1.06	0.627155	0.999395	0	1.25	0.082961	0.895664	0	1.26	0.077085	0.465022	0	1.29	0.053405	0.387207	0	1.22	0.122626	0.58171	0	1.77	3.7e-05	0.001201	1	1.5	0.002363	0.038071	1	1.54	0.001341	0.021334	1	1.23	0.11083	0.351051	0	1.18	0.194203	0.451575	0	1.46	0.004586	0.044743	0	7
7	FBgn0034538	CG16799	CG16799	1.13	0.371876	0.999395	0	1.27	0.074804	0.871734	0	1.39	0.01579	0.213978	0	1.51	0.014384	0.18393	0	1.49	0.003994	0.069081	0	1.92	1e-05	0.000389	1	1.56	0.001482	0.026845	1	1.73	0.000131	0.003217	1	1.13	0.376644	0.66376	0	1.19	0.203774	0.463208	0	1.46	0.006815	0.06053	0	7
7	FBgn0033786	CG3884	CG3884	-1.01	0.943401	0.999703	0	1.16	0.313917	0.968665	0	1.4	0.027481	0.291485	0	1.46	0.013506	0.176123	0	1.44	0.018256	0.198323	0	1.87	0.0001	0.002784	1	1.79	0.000261	0.006642	1	1.57	0.003861	0.046779	1	1.29	0.090599	0.313398	0	-1.02	0.890474	0.957798	0	1.41	0.024933	0.157226	0	7
7	FBgn0027562	CG10345	CG10345	1.19	0.203114	0.999395	0	1.09	0.514114	0.981307	0	1.16	0.276981	0.722004	0	1.49	0.004478	0.088645	0	1.44	0.009173	0.12587	0	1.57	0.001466	0.024447	1	1.55	0.001896	0.032494	1	1.71	0.000177	0.004095	1	1.29	0.059847	0.249664	0	1.2	0.177395	0.427941	0	1.4	0.01461	0.10705	0	7
7	FBgn0013305	N-methyl-D-aspartate receptor-associated protein	Nmda1	-1.06	0.445741	0.999395	0	1.07	0.372772	0.972321	0	1.32	0.000812	0.032658	0	1.28	0.002247	0.055317	0	1.22	0.01405	0.16815	0	1.61	0	7e-06	1	1.54	1e-06	5.3e-05	1	1.5	3e-06	0.000125	1	1.24	0.00849	0.073177	0	1.28	0.002542	0.026128	0	1.39	9.4e-05	0.002017	0	7
7	FBgn0011554	etaTrypsin	etaTry	-1.23	0.215523	0.999395	0	1.1	0.58129	0.986756	0	1.39	0.052932	0.39893	0	1.41	0.042212	0.342818	0	1.37	0.06258	0.418951	0	2.16	2.1e-05	0.000742	1	1.9	0.000299	0.00747	1	1.73	0.001641	0.025169	1	1.58	0.008255	0.072402	0	1.03	0.862491	0.944551	0	1.38	0.058405	0.27468	0	7
7	FBgn0030270	CG15199	CG15199	-1.07	0.616239	0.999395	0	1.21	0.167099	0.949455	0	1.55	0.001859	0.058334	0	1.38	0.019666	0.221127	0	1.34	0.034642	0.29666	0	1.61	0.000783	0.01498	1	1.66	0.000386	0.009209	1	1.71	0.000191	0.004348	1	1.34	0.033186	0.176253	0	-1.01	0.956505	0.984516	0	1.37	0.0227	0.147497	0	7
7	FBgn0032264	Lipase 4	Lip4	1.32	0.036902	0.999395	0	1.19	0.186332	0.956671	0	1.34	0.029001	0.2997	0	1.14	0.321125	0.795401	0	1.01	0.936206	0.991465	0	1.85	1.4e-05	0.000531	1	1.53	0.001879	0.032287	1	1.51	0.002532	0.034666	1	1.28	0.064314	0.260047	0	1.28	0.062359	0.231621	0	1.33	0.032369	0.188856	0	7
7	FBgn0043471	kappaTry	kappaTry	1.15	0.2541	0.999395	0	1.13	0.318151	0.968964	0	1.5	0.002009	0.060483	0	1.27	0.058783	0.407519	0	1.31	0.035753	0.302639	0	2.3	0	1e-06	1	1.91	3e-06	0.000141	1	1.88	4e-06	0.00017	1	1.37	0.014182	0.101971	0	1.13	0.316907	0.585652	0	1.29	0.046923	0.240842	0	7
7	FBgn0036945	CG6981	CG6981	1.02	0.907628	0.999395	0	1.34	0.154537	0.947216	0	1.44	0.078413	0.467204	0	1.42	0.08975	0.502623	0	1.44	0.075596	0.463367	0	2.17	0.000323	0.007286	1	2.05	0.00079	0.016472	1	1.83	0.004189	0.049692	1	1.43	0.084238	0.303041	0	1.08	0.703746	0.866096	0	1.26	0.261084	0.613177	0	7
7	FBgn0035343	CG16762	CG16762	1.08	0.632334	0.999395	0	1.05	0.747146	0.989815	0	1.13	0.438792	0.820949	0	1.4	0.037199	0.322334	0	1.38	0.047511	0.359437	0	1.92	0.000131	0.003439	1	1.86	0.000234	0.006081	1	1.63	0.003247	0.041243	1	1.2	0.26008	0.555134	0	1.01	0.965087	0.988551	0	1.18	0.296167	0.649052	0	7
7	FBgn0040887	CG33254	CG33254	1.15	0.394451	0.999395	0	1.4	0.04813	0.764095	0	1.4	0.0491	0.385093	0	1.32	0.103241	0.536889	0	1.24	0.206669	0.726857	0	1.67	0.00312	0.043376	1	1.71	0.002092	0.03485	1	1.66	0.003492	0.04368	1	1.26	0.173597	0.446474	0	-1.11	0.525301	0.758288	0	1.16	0.382867	0.72939	0	7
2	FBgn0004516	Glutamic acid decarboxylase 1	Gad1	-1.13	0.382242	0.999395	0	-1.63	0.000859	0.112965	0	-1.92	1.7e-05	0.001757	1	-1.48	0.005949	0.106399	0	-1.65	0.000639	0.016505	1	-1.35	0.051014	0.306341	0	-1.68	0.001097	0.021561	1	-1.56	0.002235	0.031437	1	-1.42	0.013609	0.099221	0	-1.31	0.057218	0.219151	0	-1.5	0.004833	0.04647	0	2
7	FBgn0046876	Odorant-binding protein 83ef	Obp83ef	1.44	0.02068	0.957371	0	1.39	0.034853	0.676727	0	1.68	0.001333	0.045951	1	1.81	0.00031	0.012185	1	1.11	0.544209	0.924097	0	1.24	0.167504	0.57581	0	1.69	0.00116	0.022498	1	1.62	0.002698	0.036148	1	1.07	0.655308	0.848653	0	-1.16	0.381514	0.645397	0	1.09	0.558179	0.835438	0	7
2	FBgn0035199	CG9134	CG9134	-1.02	0.879904	0.999395	0	-1.27	0.13027	0.937274	0	-1.54	0.014918	0.207481	0	-1.27	0.136603	0.600954	0	1.08	0.626597	0.948906	0	-1.28	0.159985	0.565019	0	-1.65	0.002487	0.039389	1	-1.81	0.001147	0.018895	1	-1.39	0.041259	0.201541	0	-1.54	0.015032	0.093957	0	-1.43	0.027754	0.169827	0	2
7	FBgn0035475	CG10866	CG10866	-1.14	0.080135	0.999395	0	1.12	0.111413	0.921613	0	1.18	0.027084	0.288466	0	1.21	0.010417	0.149331	0	1.33	0.000205	0.006567	0	1.35	0.000103	0.002852	0	1.51	1e-06	3.4e-05	1	1.53	0	1.3e-05	1	1.38	4.2e-05	0.001068	0	1.18	0.024411	0.12789	0	1.39	2.4e-05	0.00062	0	7
7	FBgn0035868	CG7194	CG7194	1.19	0.252818	0.999395	0	1.28	0.115395	0.921613	0	1.44	0.02086	0.249957	0	-1.22	0.196944	0.67782	0	-1.23	0.236341	0.764466	0	1.49	0.012531	0.121835	0	1.88	0.000487	0.011193	1	1.62	0.00284	0.037749	1	1.25	0.183342	0.459404	0	-1.24	0.321209	0.589625	0	1.11	0.626655	0.866906	0	7
7	FBgn0034312	CG10916	CG10916	1.17	0.203968	0.999395	0	1.25	0.071347	0.864553	0	1.71	4.9e-05	0.004091	1	1.58	0.000475	0.016744	1	1.38	0.010939	0.141075	0	1.65	0.000144	0.003717	1	1.44	0.004143	0.057201	0	1.56	0.000609	0.011412	1	1.21	0.124757	0.374156	0	1.13	0.334912	0.602493	0	1.47	0.002549	0.029108	0	7
7	FBgn0032387	CG16965	CG16965	1.31	0.017203	0.957371	0	1.02	0.88909	0.997504	0	2.02	0	9.1e-05	1	1.61	0.008012	0.128145	0	-1.07	0.685963	0.962963	0	1.89	1e-05	0.000397	1	1.62	0.007509	0.087733	0	1.56	0.000833	0.014653	1	1.39	0.009357	0.077697	0	1.1	0.486872	0.728093	0	1.2	0.132199	0.441407	0	7
2	FBgn0031919			-1.23	0.093247	0.999395	0	-1.17	0.212411	0.957756	0	-1.26	0.040151	0.348334	0	-1.45	0.021288	0.231649	0	-1.36	0.016996	0.188781	0	-1.56	0.00023	0.005555	1	-1.26	0.043833	0.284819	0	-1.5	0.001789	0.026787	1	-1.03	0.788176	0.916852	0	-1.05	0.662392	0.843552	0	-1.09	0.454985	0.779469	0	2
3	FBgn0024963	GluClalpha	GluClalpha	-1.32	0.133302	0.999395	0	-1.27	0.189291	0.957756	0	-1.77	0.002752	0.074942	0	-1.37	0.088287	0.498941	0	-1.37	0.091008	0.509929	0	-1.85	0.003547	0.047482	1	-1.47	0.03812	0.261935	0	-1.98	0.000436	0.008698	1	-1.69	0.005809	0.056817	0	-1.66	0.013918	0.088942	0	-1.61	0.01152	0.089022	0	3
5	FBgn0050083	CG30083	CG30083	1.2	0.395891	0.999395	0	1.21	0.379229	0.97412	0	1.72	0.013545	0.198644	0	1.64	0.022854	0.24169	0	1.36	0.14984	0.635573	0	2.46	8.4e-05	0.002435	1	1.86	0.005203	0.067183	0	1.96	0.00245	0.033684	1	1.45	0.115363	0.359745	0	1.47	0.073681	0.254688	0	1.73	0.012477	0.094642	0	5
5	FBgn0034468	Odorant-binding protein 56a	Obp56a	1.14	0.576669	0.999395	0	1.8	0.024606	0.60339	0	1.79	0.014941	0.207481	0	1.56	0.062711	0.42101	0	1.84	0.011474	0.146154	0	2.2	0.001298	0.022242	1	2.01	0.004107	0.057007	0	2.03	0.003644	0.045087	1	1.54	0.068564	0.268978	0	-1.1	0.691746	0.860672	0	1.18	0.486186	0.798738	0	5
7	FBgn0004629	Cystatin-like	Cys	1.31	0.2203	0.999395	0	1.23	0.353295	0.971264	0	1.71	0.030891	0.308842	0	1.4	0.130767	0.591372	0	1.27	0.328762	0.848174	0	2.16	0.00087	0.016198	1	1.42	0.112603	0.478263	0	2.48	0.000109	0.00278	1	1.4	0.160701	0.428047	0	1.44	0.10167	0.310513	0	1.64	0.026367	0.16355	0	7
7	FBgn0038243	CG8066	CG8066	-1.06	0.721809	0.999395	0	1.26	0.170545	0.949598	0	1.43	0.037829	0.34078	0	1.74	0.003909	0.081556	0	1.59	0.007757	0.112416	0	1.85	0.000514	0.010731	1	1.52	0.015348	0.144934	0	1.65	0.004171	0.049567	1	1.14	0.435311	0.70826	0	1.06	0.72306	0.876487	0	1.62	0.005463	0.051078	0	7
7	FBgn0038359	CG5614	CG5614	1.34	0.085174	0.999395	0	1.06	0.731753	0.988753	0	1.59	0.029316	0.300486	0	1.05	0.75755	0.963335	0	1.29	0.171633	0.675168	0	1.77	0.002736	0.039339	1	1.29	0.217315	0.643032	0	1.67	0.003173	0.040616	1	1.45	0.047961	0.220861	0	1.27	0.150268	0.391997	0	1.3	0.155774	0.480443	0	7
7	FBgn0039514			-1.02	0.928393	0.999703	0	-1.01	0.948865	0.99777	0	-1.11	0.578873	0.882089	0	1.31	0.167766	0.644769	0	1.51	0.037577	0.311026	0	2.16	0.00021	0.005161	1	1.22	0.308094	0.736911	0	1.93	0.001327	0.021201	1	1.47	0.05245	0.232314	0	1.41	0.08491	0.278993	0	1.28	0.214721	0.562588	0	7
7	FBgn0034289	CG10910	CG10910	1.26	0.09993	0.999395	0	1.63	0.000722	0.099947	0	1.56	0.001942	0.059691	0	1.23	0.14094	0.607338	0	1.45	0.009089	0.124973	0	1.63	0.000738	0.01428	1	1.44	0.009344	0.102265	0	1.62	0.000846	0.01483	1	1.32	0.044704	0.211623	0	-1.13	0.370323	0.635392	0	1.26	0.09141	0.358523	0	7
7	FBgn0052945	CG32945	CG32945	1.15	0.201774	0.999395	0	1.12	0.364562	0.972321	0	1.37	0.01272	0.192408	0	1.12	0.484256	0.884	0	1.15	0.222758	0.746885	0	1.55	0.000234	0.005623	1	1.19	0.154673	0.551749	0	1.95	2e-06	7.5e-05	1	1	0.991625	0.997316	0	1	0.980234	0.993553	0	1.25	0.066876	0.297288	0	7
7	FBgn0050002			1.17	0.272022	0.999395	0	1.09	0.562509	0.984159	0	1.22	0.177008	0.615547	0	1.05	0.73632	0.957752	0	1.45	0.010965	0.141075	0	1.65	0.000872	0.016198	1	1.46	0.010111	0.108759	0	1.7	0.000451	0.00895	1	1.24	0.134945	0.390286	0	-1.11	0.460071	0.709067	0	1.25	0.118544	0.415178	0	7
7	FBgn0034670	CG13488	CG13488	1.52	0.121392	0.999395	0	1.46	0.028552	0.634064	0	1.76	0.005619	0.115219	0	1.15	0.394767	0.837239	0	1.39	0.213938	0.738618	0	1.83	0.002466	0.036261	1	1.46	0.054256	0.323006	0	2.09	9.7e-05	0.002532	1	1.29	0.180181	0.45609	0	1.62	0.016045	0.097737	0	1.19	0.373237	0.721924	0	7
7	FBgn0035830	CG8209	CG8209	1.15	0.228248	0.999395	0	1.44	0.002691	0.209943	0	1.55	0.000398	0.020223	1	1.44	0.002802	0.063081	0	1.52	0.000733	0.018534	1	1.43	0.003295	0.045022	0	1.41	0.004314	0.059013	0	1.56	0.000955	0.016236	1	1.29	0.033463	0.177224	0	1.24	0.071249	0.249751	0	1.39	0.006664	0.059425	0	7
2	FBgn0027608	CG2082	CG2082	-1.12	0.32897	0.999395	0	-1.54	0.000306	0.060684	0	-1.41	0.003833	0.09227	0	-1.46	0.001435	0.039457	0	-1.6	0.000102	0.003662	1	-1.32	0.016793	0.14993	0	-1.35	0.010448	0.111298	0	-1.54	0.001063	0.017753	1	-1.34	0.012935	0.095799	0	-1.38	0.005854	0.048729	0	-1.38	0.005649	0.052441	0	2
2	FBgn0004396	Cyclic-AMP response element binding protein A	CrebA	1.16	0.168451	0.999395	0	-1.09	0.419134	0.97412	0	-1.38	0.014257	0.203482	0	-1.37	0.004557	0.089803	0	-1.58	5.9e-05	0.002358	1	-1.31	0.013567	0.12858	0	-1.46	0.000718	0.015225	0	-1.56	0.000304	0.006353	1	-1.47	0.000547	0.009216	0	-1.36	0.005195	0.044456	0	-1.39	0.003033	0.03325	0	2
2	FBgn0026077	Gasp	Gasp	-1.03	0.826091	0.999395	0	-1.13	0.352067	0.971069	0	-1.32	0.038859	0.344015	0	-1.19	0.187607	0.67046	0	-1.67	0.000258	0.007899	1	-1.23	0.117286	0.484361	0	-1.32	0.040835	0.274427	0	-1.53	0.002219	0.031398	1	-1.4	0.014203	0.101971	0	-1.12	0.391437	0.654386	0	-1.41	0.010998	0.085998	0	2
5	FBgn0036468	CG13461	CG13461	-1.68	0.281315	0.999395	0	-1.09	0.709653	0.988335	0	2.72	7e-06	0.000988	1	3.19	3e-06	0.000295	1	1.87	0.002607	0.050308	0	1.71	0.009074	0.095422	0	1.39	0.138917	0.527472	0	1.92	0.004074	0.048641	1	1.21	0.439026	0.71118	0	1.17	0.509308	0.746032	0	1.41	0.218326	0.566962	0	5
1	FBgn0032538	CG16885	CG16885	-1	0.985378	0.999703	0	-1.49	0.03923	0.713064	0	-1.46	0.06953	0.448329	0	-1.11	0.611747	0.928784	0	-1.7	0.007139	0.106512	0	-1.35	0.116138	0.48132	0	-1.26	0.263443	0.693609	0	-1.82	0.002447	0.033684	1	-1.62	0.04252	0.205186	0	-1.36	0.10684	0.319094	0	-1.46	0.050498	0.252108	0	1
2	FBgn0003411	sisterless A	sisA	-1.23	0.293263	0.999395	0	1.18	0.428257	0.97412	0	-1.08	0.734256	0.933842	0	1.07	0.785948	0.967636	0	-1.06	0.811636	0.981007	0	-1.02	0.932898	0.985591	0	-1.52	0.084857	0.415435	0	-2.8	0.000638	0.01186	1	-1.19	0.458155	0.725226	0	-1.32	0.250922	0.517391	0	1.21	0.69349	0.89649	0	2
2	FBgn0004880	scratch	scrt	-1.43	0.016183	0.949667	0	-1.18	0.255134	0.964139	0	-1.27	0.098598	0.508065	0	-1.38	0.02775	0.270348	0	-1.17	0.270212	0.803606	0	-1.18	0.292811	0.720655	0	-1.33	0.050162	0.306949	0	-1.66	0.00082	0.014453	1	-1.37	0.033156	0.176239	0	-1.12	0.423827	0.680357	0	1.02	0.901535	0.97047	0	2
2	FBgn0036181	Mucin 68Ca	Muc68Ca	-1.29	0.292242	0.999395	0	-1.56	0.117329	0.923358	0	-1.12	0.645132	0.904784	0	-1.62	0.186245	0.669824	0	-1.07	0.788543	0.97701	0	-1.33	0.400786	0.809268	0	-1.58	0.10732	0.467169	0	-2.75	0.001429	0.022337	1	-1.4	0.164642	0.433978	0	-1.23	0.398281	0.659218	0	1	0.989174	0.998229	0	2
2	FBgn0029890	CG4095	CG4095	1.08	0.5959	0.999395	0	1.01	0.969964	0.99777	0	-1.17	0.30181	0.737213	0	-1.24	0.157977	0.631379	0	-1.23	0.172718	0.677261	0	-1.12	0.45547	0.832782	0	-1.14	0.38531	0.791268	0	-1.85	0.000144	0.003439	1	-1.2	0.233184	0.524129	0	-1.4	0.02985	0.145038	0	-1.14	0.388562	0.734279	0	2
2	FBgn0028703	Na[+]/H[+] hydrogen exchanger 3	Nhe3	1.07	0.616304	0.999395	0	-1.06	0.621228	0.988335	0	-1.27	0.079091	0.46883	0	-1.37	0.012549	0.169011	0	-1.25	0.069255	0.441999	0	-1.46	0.013534	0.128354	0	-1.23	0.100025	0.450028	0	-1.7	0.000206	0.004661	1	1.15	0.257924	0.553898	0	-1.26	0.092505	0.29336	0	-1.14	0.374073	0.722372	0	2
2	FBgn0004648	silver	svr	-1.08	0.517887	0.999395	0	-1.12	0.358496	0.971666	0	-1.17	0.213952	0.661842	0	-1.09	0.505517	0.894199	0	-1.11	0.419435	0.888124	0	-1.23	0.091431	0.425285	0	-1.17	0.203621	0.625228	0	-1.71	5.6e-05	0.001579	1	-1	0.985594	0.995348	0	1.05	0.694431	0.861944	0	-1.16	0.220044	0.569162	0	2
2	FBgn0001203	Hyperkinetic	Hk	1.13	0.321157	0.999395	0	-1.2	0.143467	0.946789	0	-1.21	0.134204	0.567237	0	-1.39	0.009856	0.144267	0	-1.12	0.362152	0.86393	0	-1.15	0.267735	0.701482	0	-1.22	0.120162	0.495617	0	-1.75	0.000137	0.003319	1	-1.19	0.165137	0.434492	0	-1.38	0.020758	0.115329	0	-1.18	0.184392	0.520694	0	2
2	FBgn0034408	serrano	sano	-1.23	0.24137	0.999395	0	-1.03	0.887397	0.997504	0	-1.16	0.451955	0.828442	0	-1.19	0.326848	0.798955	0	-1.11	0.567538	0.933087	0	-1.15	0.44204	0.827068	0	-1.18	0.355385	0.770678	0	-1.91	0.000575	0.01093	1	1.08	0.67625	0.859369	0	-1.09	0.618317	0.816587	0	-1.19	0.335393	0.688496	0	2
2	FBgn0034602	CG15658	CG15658	-1.13	0.275933	0.999395	0	-1.1	0.377578	0.97412	0	-1.34	0.008756	0.155956	0	-1.3	0.019432	0.220127	0	-1.22	0.07922	0.475718	0	-1.26	0.041347	0.266435	0	-1.16	0.180949	0.597631	0	-1.53	0.000261	0.00562	1	-1.33	0.010813	0.085058	0	-1.47	0.00074	0.009952	0	-1.19	0.112189	0.40227	0	2
2	FBgn0050062	CG30062	CG30062	1.27	0.070847	0.999395	0	-1.11	0.486368	0.979862	0	1.01	0.96361	0.991985	0	1.05	0.718923	0.955123	0	1.03	0.832792	0.984174	0	1.04	0.760177	0.94357	0	1.02	0.879528	0.975448	0	-1.86	0.003976	0.047639	1	-1.05	0.680211	0.861652	0	1.08	0.560737	0.781559	0	-1.2	0.173174	0.505923	0	2
2	FBgn0016797	frizzled 2	fz2	1.09	0.424211	0.999395	0	-1	0.997875	0.999475	0	-1.11	0.314842	0.746697	0	-1.18	0.127718	0.583908	0	-1.17	0.153198	0.641743	0	-1.14	0.213521	0.641159	0	-1.16	0.162665	0.565222	0	-1.65	1.6e-05	0.000555	1	-1.11	0.347651	0.639769	0	-1.25	0.042507	0.182657	0	-1.2	0.099001	0.376445	0	2
2	FBgn0053453	CG33453	CG33453	-1.06	0.763455	0.999395	0	1.11	0.598715	0.988335	0	-1.66	0.039731	0.347462	0	-1.31	0.147737	0.61926	0	-1.26	0.277476	0.81236	0	-1.16	0.438167	0.825403	0	1.06	0.738961	0.9448	0	-2.11	0.003439	0.04317	1	-2.19	0.064191	0.259706	0	-1.19	0.357705	0.623652	0	-1.2	0.326719	0.679444	0	2
2	FBgn0037896	ninaG	ninaG	-1.07	0.500084	0.999395	0	-1.08	0.489587	0.979862	0	-1.31	0.012888	0.19383	0	-1.17	0.152868	0.624838	0	-1.14	0.231745	0.75724	0	-1.1	0.356594	0.777848	0	-1.26	0.035359	0.250972	0	-1.61	3.3e-05	0.001006	1	-1.2	0.097823	0.327195	0	-1.14	0.215849	0.479037	0	-1.21	0.077456	0.324158	0	2
2	FBgn0053281	CG33281	CG33281	1.02	0.835971	0.999395	0	-1.15	0.241857	0.960504	0	-1.26	0.07446	0.458708	0	-1.25	0.05931	0.408825	0	1.1	0.432786	0.893166	0	-1.09	0.479311	0.84132	0	-1.32	0.020506	0.174242	0	-1.61	0.000118	0.002965	1	-1.22	0.123163	0.372523	0	-1.24	0.070417	0.248261	0	-1.21	0.097658	0.373823	0	2
2	FBgn0032282	CG7299	CG7299	-1.08	0.515837	0.999395	0	1.02	0.887183	0.997504	0	-1.12	0.344883	0.767998	0	-1.24	0.077712	0.469527	0	-1.3	0.02911	0.265731	0	-1.16	0.215494	0.64403	0	-1.27	0.046234	0.293031	0	-1.53	0.000681	0.012519	1	-1.37	0.010182	0.082176	0	-1.45	0.00284	0.028451	0	-1.24	0.07922	0.329333	0	2
2	FBgn0033704	CG13169	CG13169	1.06	0.803164	0.999395	0	1.01	0.969811	0.99777	0	-1.46	0.083254	0.477364	0	1.03	0.881829	0.984796	0	-1.11	0.622854	0.947646	0	-1.26	0.336554	0.762723	0	-1.29	0.242617	0.67212	0	-1.92	0.003793	0.046263	1	-1.28	0.255471	0.551322	0	-1.15	0.568533	0.786091	0	-1.24	0.379833	0.727087	0	2
2	FBgn0036531	CG6244	CG6244	1.17	0.266497	0.999395	0	-1.1	0.551874	0.984159	0	-1.55	0.091789	0.496539	0	-1.74	0.026977	0.267432	0	-1.22	0.25485	0.785149	0	-1.6	0.026738	0.205297	0	-1.43	0.024504	0.196404	0	-2.01	0.000303	0.006346	1	-1.15	0.415228	0.69389	0	1.03	0.88575	0.955761	0	-1.26	0.14061	0.45786	0	2
2	FBgn0050157	CG30157	CG30157	-1.15	0.294121	0.999395	0	-1.02	0.857003	0.996946	0	-1.22	0.127267	0.558387	0	-1.43	0.017167	0.20731	0	-1.14	0.314322	0.836485	0	-1.11	0.421848	0.817166	0	-1.27	0.050937	0.309982	0	-1.76	0.000396	0.008007	1	1.1	0.514556	0.765927	0	1.04	0.753352	0.892876	0	-1.26	0.117086	0.411965	0	2
2	FBgn0039702	Vacuolar protein sorting 16B	Vps16B	-1.16	0.227719	0.999395	0	-1.12	0.365174	0.972321	0	-1.05	0.721913	0.92985	0	1.07	0.601696	0.924526	0	1.02	0.871358	0.987636	0	-1.16	0.227087	0.659098	0	-1.17	0.207352	0.631829	0	-1.57	0.000602	0.011353	1	-1.35	0.019579	0.12636	0	-1.14	0.306729	0.575912	0	-1.3	0.039642	0.215506	0	2
2	FBgn0038645	CG7714	CG7714	-1.27	0.091903	0.999395	0	1.14	0.335196	0.969629	0	-1.52	0.016403	0.218022	0	-1.39	0.021101	0.231224	0	-1.49	0.023046	0.227197	0	-1.24	0.125138	0.501183	0	-1.17	0.345751	0.765522	0	-1.96	4.6e-05	0.001338	1	-1.1	0.493055	0.74884	0	-1.25	0.192503	0.4492	0	-1.3	0.087773	0.349631	0	2
2	FBgn0034783	CG9825	CG9825	1.32	0.108977	0.999395	0	-1.03	0.840008	0.996043	0	-1.33	0.125942	0.557027	0	-1.69	0.006019	0.107207	0	-1.28	0.18487	0.694715	0	-1.51	0.01839	0.159246	0	-1.61	0.006285	0.077495	0	-1.89	0.003172	0.040616	1	-1.17	0.368148	0.657003	0	-1.49	0.022278	0.120561	0	-1.3	0.12454	0.426375	0	2
2	FBgn0039703	CG7829	CG7829	1.16	0.308905	0.999395	0	-1.22	0.169594	0.949455	0	-1.37	0.027829	0.292886	0	-1.02	0.875479	0.983753	0	-1.33	0.047147	0.358646	0	-1.32	0.051778	0.30885	0	-1.36	0.03388	0.244145	0	-1.54	0.003164	0.040575	1	-1.46	0.00928	0.077293	0	-1.13	0.400775	0.660889	0	-1.31	0.056978	0.270213	0	2
2	FBgn0053547	Rim	Rim	-1.42	0.001238	0.493029	0	-1.27	0.023564	0.591526	0	-1.38	0.005979	0.120555	0	-1.37	0.003508	0.074543	0	-1.24	0.043823	0.343163	0	1.04	0.737589	0.938429	0	-1.39	0.002086	0.034822	0	-1.56	5.7e-05	0.001609	1	-1.02	0.826982	0.936141	0	-1.12	0.270953	0.541207	0	-1.32	0.009726	0.078528	0	2
2	FBgn0038028	CG10035	CG10035	-1.34	0.184105	0.999395	0	-1.87	0.006005	0.328882	0	-1.67	0.023038	0.263103	0	-1.58	0.03991	0.334787	0	-1.44	0.103011	0.543406	0	-1.56	0.04794	0.296133	0	-1.02	0.93454	0.986248	0	-2.01	0.002361	0.032742	1	-1.06	0.796338	0.922197	0	-1.49	0.072329	0.252094	0	-1.35	0.180265	0.51411	0	2
2	FBgn0004575	Synapsin	Syn	-1.09	0.554802	0.999395	0	-1.1	0.510481	0.981307	0	-1.32	0.054134	0.402475	0	-1.38	0.027775	0.270348	0	-1.42	0.031906	0.280537	0	-1.32	0.055096	0.319674	0	-1.36	0.053248	0.318304	0	-1.86	6.2e-05	0.001724	1	-1.3	0.101737	0.335761	0	-1.41	0.018438	0.106961	0	-1.35	0.039405	0.214931	0	2
2	FBgn0031967			-1.82	0.010175	0.822654	0	-1.28	0.195978	0.957756	0	-1.91	0.004309	0.099197	0	-1.55	0.084744	0.490733	0	-1.09	0.709576	0.965026	0	-1.54	0.102133	0.452947	0	-1.09	0.782225	0.956408	0	-3.75	0.003707	0.045626	1	-1.52	0.062988	0.256981	0	-1.28	0.253037	0.520224	0	-1.36	0.164745	0.493633	0	2
2	FBgn0029846	Ca-alpha1T	Ca-alpha1T	-1.03	0.859739	0.999395	0	-1.1	0.676922	0.988335	0	-1.15	0.550662	0.871262	0	-1.15	0.441921	0.86236	0	-1.11	0.542086	0.924097	0	-1.18	0.366353	0.783853	0	-1.1	0.584485	0.89763	0	-2.13	0.000453	0.008963	1	-1.45	0.027856	0.157627	0	-1.2	0.319268	0.587808	0	-1.38	0.076293	0.321547	0	2
2	FBgn0004870	bric a brac 1	bab1	1.24	0.161998	0.999395	0	-1.25	0.181924	0.951679	0	1.01	0.956855	0.990101	0	1.17	0.337876	0.804551	0	-1.13	0.409522	0.882509	0	-1.18	0.283832	0.714732	0	-1.5	0.00931	0.102152	0	-1.58	0.003885	0.046982	1	1.35	0.052014	0.231379	0	-1.22	0.19069	0.446812	0	-1.4	0.046087	0.238106	0	2
2	FBgn0030574	CG9413	CG9413	-1.05	0.583364	0.999395	0	-1.22	0.026315	0.616165	0	-1.28	0.011545	0.180886	0	-1.24	0.015129	0.189577	0	-1.3	0.003979	0.069002	0	-1.34	0.001147	0.020158	0	-1.3	0.003518	0.051369	0	-1.55	4e-06	0.000172	1	-1.4	0.000287	0.005358	0	-1.48	2.5e-05	0.000619	0	-1.41	0.000188	0.003484	0	2
2	FBgn0015569	alpha-Esterase-10	alpha-Est10	-1.18	0.221687	0.999395	0	-1.23	0.127304	0.933824	0	-1.56	0.001893	0.058695	0	-1.28	0.106661	0.541407	0	-1.23	0.140475	0.620167	0	-1.45	0.008861	0.093929	0	-1.13	0.389193	0.793662	0	-1.53	0.002927	0.03852	1	-1.22	0.183187	0.45926	0	-1.13	0.362613	0.628077	0	-1.42	0.012995	0.097666	0	2
2	FBgn0027885	Aac11	Aac11	-1.05	0.471354	0.999395	0	-1.21	0.011988	0.438932	0	-1.3	0.00053	0.025171	0	-1.38	4.2e-05	0.002582	0	-1.32	0.000288	0.008636	0	-1.38	4.4e-05	0.001391	0	-1.45	3e-06	0.000155	0	-1.55	0	8e-06	1	-1.48	1e-06	5e-05	0	-1.36	9e-05	0.001769	0	-1.43	9e-06	0.000264	0	2
2	FBgn0030387			-1.05	0.529277	0.999395	0	-1.27	0.003711	0.255383	0	-1.36	0.000238	0.01393	0	-1.31	0.001284	0.03623	0	-1.35	0.000421	0.01153	0	-1.23	0.011551	0.114851	0	-1.33	0.000622	0.013437	0	-1.51	2e-06	0.000111	1	-1.41	6e-05	0.00142	0	-1.34	0.000511	0.007384	0	-1.45	1.7e-05	0.000485	0	2
2	FBgn0035978	UGP	UGP	-1.04	0.575242	0.999395	0	-1.3	0.000623	0.093359	0	-1.38	3.9e-05	0.003437	0	-1.4	1.7e-05	0.001275	0	-1.34	0.00014	0.00479	0	-1.37	4.4e-05	0.001389	0	-1.44	4e-06	0.000206	0	-1.5	0	2.8e-05	1	-1.35	8.6e-05	0.001903	0	-1.33	0.000187	0.003305	0	-1.47	2e-06	6.3e-05	0	2
2	FBgn0032185			-1.03	0.799341	0.999395	0	-1.09	0.512249	0.981307	0	-1.15	0.288651	0.729213	0	-1.36	0.010549	0.150684	0	-1.29	0.018233	0.198242	0	-1.19	0.107497	0.462248	0	-1.35	0.00705	0.084108	0	-1.6	0.003034	0.039364	1	-1.29	0.018567	0.122273	0	-1.28	0.023297	0.124133	0	-1.5	0.000359	0.00587	0	2
2	FBgn0037124	CG14568	CG14568	-1.09	0.634869	0.999395	0	-1.08	0.68863	0.988335	0	-1.44	0.057793	0.415582	0	-1.03	0.894214	0.986841	0	-1.33	0.136222	0.612605	0	-1.55	0.040685	0.264281	0	-1.19	0.357124	0.771469	0	-1.78	0.003564	0.044406	1	-1.53	0.048471	0.222005	0	-1.42	0.068982	0.245204	0	-1.7	0.007082	0.062183	0	2
3	FBgn0000038	nicotinic Acetylcholine Receptor beta 64B	nAcRbeta-64B	-1.43	0.059684	0.999395	0	-1.42	0.060916	0.823806	0	-1.33	0.16793	0.60478	0	-1.54	0.023501	0.245668	0	-1.64	0.009375	0.127973	0	-1.67	0.007485	0.082476	0	-1.67	0.007417	0.087372	0	-1.94	0.000676	0.012473	1	-1.66	0.007984	0.071156	0	-1.46	0.046964	0.194376	0	-1.35	0.111222	0.40066	0	3
3	FBgn0037323	CG2663	CG2663	-1.14	0.595513	0.999395	0	-1.08	0.745221	0.989815	0	-1.03	0.906421	0.984014	0	-1.14	0.736231	0.957752	0	-1.24	0.455852	0.902571	0	-1.39	0.243229	0.679377	0	-1.44	0.380597	0.788534	0	-2.18	0.002935	0.038587	1	-1.72	0.036687	0.187136	0	-1.46	0.134675	0.366295	0	-1.98	0.009583	0.077805	0	3
4	FBgn0032209	Hand	Hand	1.06	0.720471	0.999395	0	-1.1	0.517779	0.981307	0	1.25	0.122535	0.550208	0	-1.18	0.247459	0.735607	0	-1.2	0.256092	0.787261	0	1.14	0.368475	0.784264	0	1.11	0.496308	0.858832	0	1.6	0.003955	0.047522	1	-1.02	0.881376	0.957741	0	-1.07	0.682556	0.855636	0	1.45	0.036773	0.205895	0	4
4	FBgn0039197	CG17780	CG17780	1.04	0.779912	0.999395	0	1.25	0.121936	0.928529	0	-1.17	0.264938	0.711644	0	1.13	0.37647	0.829345	0	1.15	0.33959	0.852544	0	-1.11	0.454371	0.832523	0	1.1	0.518415	0.871105	0	1.78	0.000452	0.008958	1	1.36	0.033714	0.178192	0	1.28	0.087538	0.283699	0	1.33	0.072419	0.312935	0	4
4	FBgn0038140	CG8784	CG8784	1.07	0.566204	0.999395	0	1.3	0.022954	0.591526	0	1.18	0.150526	0.585514	0	1.03	0.782639	0.966768	0	-1.02	0.850105	0.985777	0	-1.03	0.78787	0.951979	0	1.21	0.09766	0.444203	0	1.59	0.000143	0.003424	1	1.15	0.228545	0.518327	0	1.01	0.960287	0.985856	0	1.26	0.046704	0.240354	0	4
4	FBgn0043550	Tetraspanin 68C	Tsp68C	-1.08	0.525491	0.999395	0	1.18	0.192146	0.957756	0	1.29	0.034005	0.32274	0	1.13	0.35015	0.812125	0	1.43	0.006809	0.103256	0	-1.1	0.463059	0.834376	0	1.28	0.039705	0.269446	0	1.75	6.9e-05	0.001912	1	1.37	0.008903	0.075429	0	1.11	0.382665	0.646193	0	1.23	0.078677	0.327801	0	4
4	FBgn0052383	sphinx1	sphinx1	1.09	0.551835	0.999395	0	1.05	0.740568	0.989483	0	-1.01	0.940231	0.986316	0	1.17	0.264313	0.750409	0	1.06	0.684328	0.962497	0	1.09	0.527872	0.86208	0	1.08	0.575153	0.894877	0	1.74	0.00023	0.005096	1	1.14	0.345313	0.637569	0	1.22	0.166047	0.413085	0	1.22	0.163728	0.49189	0	4
4	FBgn0032675			1.01	0.939408	0.999703	0	1.43	0.002458	0.204189	0	1.27	0.034255	0.324648	0	1.14	0.302007	0.782861	0	-1.08	0.527492	0.923779	0	1.31	0.019672	0.166703	0	1	0.998526	0.999515	0	1.51	0.003674	0.045346	1	1.23	0.093821	0.319749	0	1.19	0.161075	0.406996	0	1.17	0.174333	0.507539	0	4
4	FBgn0038732	CG11391	CG11391	1.02	0.900268	0.999395	0	1.18	0.264144	0.964139	0	-1.07	0.648527	0.906109	0	1.18	0.262441	0.749139	0	1.04	0.785062	0.976505	0	1.29	0.08461	0.40793	0	-1.01	0.923835	0.984213	0	1.54	0.003941	0.047392	1	1.26	0.150344	0.411123	0	1.15	0.342487	0.609614	0	1.15	0.34224	0.694908	0	4
4	FBgn0039848	lysyl oxidase-like	lox	1.11	0.456304	0.999395	0	-1.13	0.370136	0.972321	0	-1.06	0.621138	0.896292	0	1.03	0.789835	0.968831	0	1.02	0.845774	0.985524	0	1.03	0.810384	0.955648	0	-1.02	0.887069	0.977746	0	1.74	4.8e-05	0.001394	1	1.1	0.473729	0.735684	0	-1.15	0.358225	0.62394	0	1.14	0.285296	0.638227	0	4
4	FBgn0033599	CG13223	CG13223	-1.11	0.524992	0.999395	0	1.05	0.740348	0.989414	0	-1.01	0.967762	0.992853	0	1.04	0.806817	0.972011	0	1.16	0.366266	0.866077	0	1.02	0.924314	0.984906	0	1.22	0.260944	0.691445	0	1.72	0.002725	0.036363	1	1.37	0.052472	0.232314	0	1.08	0.614922	0.814337	0	1.12	0.464055	0.784664	0	4
4	FBgn0034668			1.03	0.849606	0.999395	0	1.06	0.678417	0.988335	0	1.27	0.082304	0.475083	0	1.09	0.513219	0.896632	0	1	0.984007	0.998439	0	1.1	0.494616	0.847912	0	1.26	0.113576	0.4804	0	1.57	0.003127	0.04022	1	1.13	0.41406	0.693529	0	1.07	0.600808	0.806538	0	1.08	0.594429	0.853683	0	4
4	FBgn0039479	CG14257	CG14257	-1.13	0.473163	0.999395	0	-1.04	0.845664	0.996946	0	-1.01	0.943079	0.986316	0	1.2	0.191637	0.673488	0	1.08	0.558764	0.929596	0	1.03	0.86675	0.97112	0	-1.01	0.961007	0.992906	0	-1.53	0.003112	0.040181	1	1.07	0.640819	0.841009	0	1.43	0.010713	0.073836	0	1.07	0.607003	0.857594	0	4
4	FBgn0051414	CG31414	CG31414	-1.02	0.877762	0.999395	0	-1.13	0.414343	0.97412	0	-1.12	0.399135	0.796803	0	-1.02	0.904453	0.988656	0	-1.06	0.657484	0.957686	0	1.33	0.042177	0.269862	0	1.22	0.15141	0.547445	0	1.66	0.001365	0.021507	1	-1.02	0.891149	0.961536	0	1.19	0.209925	0.471242	0	1.01	0.938022	0.982503	0	4
4	FBgn0053349	pickpocket 25	ppk25	-1.13	0.516336	0.999395	0	1.25	0.310566	0.968665	0	-1.31	0.118986	0.543457	0	1.1	0.533724	0.906244	0	-1.12	0.564118	0.932395	0	1.06	0.770935	0.947457	0	-1.02	0.924958	0.984281	0	2.29	0.000633	0.011788	1	-1.35	0.128009	0.380251	0	1.1	0.585154	0.796648	0	-1.39	0.386238	0.732415	0	4
4	FBgn0036440	CG17177	CG17177	-1.4	0.141261	0.999395	0	1.07	0.787028	0.99325	0	1.47	0.168706	0.60582	0	-1.21	0.548311	0.907746	0	1.89	0.025635	0.244359	0	1.09	0.72315	0.933273	0	1.2	0.468496	0.846512	0	2.21	0.002588	0.035121	1	-1.37	0.422262	0.697579	0	-1.27	0.292036	0.562546	0	-1.62	0.054954	0.264954	0	4
6	FBgn0038042	Sarcoglycan beta	Scgbeta	1.01	0.911116	0.999395	0	1.05	0.710757	0.988335	0	1.04	0.764472	0.944888	0	-1.31	0.089933	0.502623	0	-1.27	0.068182	0.438102	0	-1.08	0.564442	0.878076	0	-1.15	0.278419	0.711024	0	-1.58	0.001874	0.027746	1	-1.47	0.004312	0.045601	0	-1.26	0.08138	0.272129	0	-1.17	0.23031	0.581079	0	6
7	FBgn0031560	CG16713	CG16713	-1.32	0.139189	0.999395	0	1.13	0.517485	0.981307	0	1.23	0.269309	0.715549	0	1.42	0.093878	0.514058	0	1.51	0.030723	0.273145	0	1.74	0.004518	0.057161	0	1.6	0.014786	0.141557	0	1.82	0.00224	0.031437	1	1.21	0.301844	0.597552	0	-1.03	0.860674	0.943678	0	1.57	0.01861	0.127541	0	7
7	FBgn0040505	Alk	Alk	1.06	0.563163	0.999395	0	-1.04	0.697757	0.988335	0	1.37	0.003465	0.086515	0	1.48	0.000329	0.01278	0	1.4	0.001923	0.03966	0	1.49	0.000298	0.006888	0	1.23	0.05268	0.316203	0	1.58	4.8e-05	0.001394	1	1.41	0.00377	0.041437	0	1.31	0.011648	0.078277	0	1.48	0.000371	0.005999	0	7
7	FBgn0046763	CG17278	CG17278	1.17	0.204101	0.999395	0	1.19	0.155578	0.947558	0	1.19	0.159856	0.595119	0	1.08	0.551498	0.909091	0	1.14	0.281519	0.814508	0	1.46	0.002733	0.039339	0	1.3	0.035921	0.25289	0	1.57	0.000446	0.008849	1	1.15	0.251719	0.546375	0	1.07	0.572943	0.788971	0	1.47	0.002497	0.028689	0	7
7	FBgn0035470	CG14980	CG14980	-1.01	0.867139	0.999395	0	-1.04	0.697548	0.988335	0	1.07	0.419662	0.807786	0	1.2	0.032614	0.298106	0	1.24	0.015126	0.177375	0	1.37	0.00128	0.02204	0	1.26	0.008401	0.094597	0	1.58	2e-06	7.5e-05	1	1.28	0.005228	0.052906	0	1.18	0.085287	0.279645	0	1.44	6.3e-05	0.001428	0	7
7	FBgn0029717	CG12684	CG12684	-1.24	0.329826	0.999395	0	1.16	0.442999	0.974172	0	-1.13	0.57928	0.88217	0	1.79	0.004321	0.08646	0	1.41	0.086106	0.497085	0	1.61	0.010049	0.103194	0	1.68	0.005391	0.068999	0	2.18	0.00026	0.00562	1	1.31	0.138045	0.394943	0	1.55	0.018207	0.106113	0	1.44	0.046546	0.239754	0	7
7	FBgn0040723	CG5011	CG5011	-1.03	0.9263	0.999703	0	-1	0.988036	0.998783	0	1.27	0.327192	0.757475	0	1.77	0.048416	0.366821	0	1.11	0.749879	0.973067	0	1.17	0.63639	0.904069	0	1.4	0.125076	0.50335	0	2.82	0.000136	0.003293	1	1.4	0.092515	0.317103	0	1.3	0.369049	0.634303	0	1.39	0.236131	0.586646	0	7
7	FBgn0028531	CG15286	CG15286	1.32	0.179975	0.999395	0	1.26	0.27225	0.964139	0	1.22	0.295602	0.733168	0	1.3	0.166924	0.64451	0	1.01	0.949257	0.992337	0	1.21	0.366618	0.783908	0	1.4	0.107107	0.466664	0	2.05	0.001173	0.019234	1	1.39	0.089907	0.312267	0	1.4	0.116394	0.33507	0	1.38	0.09584	0.3701	0	7
7	FBgn0052802	CG32802	CG32802	1.13	0.393342	0.999395	0	1.03	0.841203	0.996665	0	1.28	0.114721	0.536934	0	1.34	0.043402	0.347669	0	1.11	0.454444	0.901957	0	-1.04	0.771873	0.947795	0	1.31	0.059954	0.343119	0	1.71	0.002715	0.03631	1	1.45	0.010647	0.084208	0	1.08	0.588797	0.79869	0	1.36	0.052259	0.256548	0	7
7	FBgn0001224	Heat shock protein 23	Hsp23	-1.14	0.554964	0.999395	0	1.18	0.464859	0.977997	0	1.26	0.311869	0.743971	0	1.14	0.559636	0.912367	0	1.39	0.149416	0.634801	0	1.65	0.029776	0.220634	0	1.81	0.010807	0.114558	0	2.05	0.00241	0.033282	1	1.31	0.23976	0.531027	0	1.03	0.893115	0.958132	0	1.34	0.202822	0.547771	0	7
7	FBgn0050148	CG30148	CG30148	-1.12	0.4837	0.999395	0	1.14	0.435342	0.974172	0	1.29	0.133318	0.567237	0	1.21	0.247119	0.735499	0	1.07	0.667762	0.958529	0	1.42	0.036674	0.249526	0	1.45	0.029559	0.223434	0	1.65	0.003768	0.04608	1	1.19	0.289826	0.585847	0	-1.08	0.624943	0.820585	0	1.32	0.100072	0.378326	0	7
7	FBgn0034331	CG15067	CG15067	-1.03	0.888974	0.999395	0	1.23	0.31593	0.968665	0	2	0.001495	0.050113	0	1.73	0.010831	0.152638	0	1.46	0.071972	0.449442	0	1.82	0.005534	0.066439	0	1.59	0.028975	0.219902	0	1.96	0.001931	0.028261	1	1.07	0.736479	0.891602	0	-1.13	0.556569	0.778805	0	1.23	0.318178	0.672835	0	7
7	FBgn0025573	Protein phosphatase N at 58A	PpN58A	1.24	0.04826	0.999395	0	1.32	0.005689	0.321155	0	1.15	0.149102	0.584643	0	1.13	0.193411	0.673961	0	1.12	0.225551	0.749273	0	1.16	0.13193	0.51369	0	1.37	0.004534	0.061087	0	1.54	4e-05	0.001201	1	1.46	0.0007	0.01122	0	1.26	0.01782	0.104762	0	1.21	0.055019	0.26496	0	7
7	FBgn0011279	Pheromone-binding protein-related protein 1	Pbprp1	1	0.982482	0.999703	0	1.12	0.521795	0.981924	0	1.15	0.389647	0.791666	0	1.33	0.155931	0.628838	0	1.99	0.004182	0.071578	0	1.25	0.420115	0.816442	0	1.53	0.036327	0.254271	0	1.8	0.000628	0.011702	1	1.34	0.201121	0.483581	0	1.11	0.516915	0.751142	0	1.16	0.345686	0.6979	0	7
7	FBgn0051720	CG31720	CG31720	1.28	0.200062	0.999395	0	1.16	0.396614	0.97412	0	1.03	0.903808	0.984014	0	1.42	0.045759	0.358156	0	1.35	0.185833	0.696735	0	1.4	0.039148	0.258578	0	1.5	0.013108	0.13083	0	1.83	0.001117	0.018465	1	1.35	0.090336	0.313151	0	1.15	0.525724	0.758444	0	1.14	0.517445	0.813809	0	7
7	FBgn0036659	CG9701	CG9701	1.16	0.397227	0.999395	0	-1.22	0.24499	0.963641	0	-1.13	0.492622	0.846917	0	-1.02	0.901689	0.987479	0	1.19	0.31263	0.835512	0	1.54	0.014988	0.138455	0	1.6	0.008344	0.094311	0	1.67	0.004178	0.049611	1	1.22	0.247686	0.54173	0	1.48	0.025002	0.129746	0	1.04	0.838036	0.948754	0	7
3	FBgn0030133	CG15316	CG15316	-3.5	0.000859	0.472058	0	-5.14	5e-06	0.002871	1	-1.98	0.038968	0.344015	0	-4.84	1e-05	0.000809	1	-2.68	0.007449	0.10972	0	-3.92	9.5e-05	0.002698	1	-4.54	8.2e-05	0.002563	1	-1.9	0.051521	0.271549	0	-1.76	0.087146	0.30795	0	-1.26	0.521358	0.754846	0	-2.38	0.017534	0.121689	0	3
2	FBgn0031157	CG1503	CG1503	1.04	0.738921	0.999395	0	-1.12	0.284196	0.968329	0	-1.17	0.155183	0.591148	0	-1.08	0.492786	0.889309	0	-1.17	0.14052	0.620167	0	-1.63	3.2e-05	0.00105	1	-1.5	0.000376	0.00901	1	-1.38	0.003775	0.046118	0	-1.23	0.057016	0.24389	0	-1.36	0.006443	0.051992	0	-1.2	0.102958	0.384678	0	2
3	FBgn0004782	Ccp84Ab	Ccp84Ab	-1.1	0.595467	0.999395	0	1.09	0.655359	0.988335	0	-1.36	0.268687	0.715065	0	-1.35	0.087406	0.496574	0	-1.32	0.114942	0.56736	0	-2.29	0.000722	0.014064	1	-1.85	0.001053	0.020824	1	-1.56	0.126569	0.436106	0	-2.19	0.006648	0.062557	0	-1.15	0.41682	0.675765	0	-1.59	0.020729	0.137898	0	3
4	FBgn0030234	CG15211	CG15211	1.02	0.904075	0.999395	0	1.09	0.501813	0.981307	0	1.08	0.550313	0.871262	0	-1.09	0.521296	0.900154	0	-1.06	0.622858	0.947646	0	1.83	1.2e-05	0.000459	1	1.51	0.001714	0.030038	1	1.42	0.006806	0.072094	0	1.07	0.625678	0.834047	0	1.01	0.937159	0.97661	0	1.12	0.354995	0.705125	0	4
4	FBgn0028950	CG15255	CG15255	1.2	0.285097	0.999395	0	1.04	0.824066	0.994557	0	1.11	0.524405	0.860721	0	-1.26	0.180881	0.663608	0	-1.31	0.112928	0.565415	0	1.8	0.000885	0.016386	1	1.68	0.003109	0.046549	1	1.57	0.009487	0.091496	0	1.13	0.478811	0.738729	0	-1.18	0.319221	0.587808	0	-1.06	0.71087	0.903538	0	4
5	FBgn0035583	CG13704	CG13704	-1.25	0.279797	0.999395	0	1.3	0.196727	0.957756	0	1.28	0.230078	0.675921	0	1.58	0.027827	0.270348	0	1.45	0.069921	0.443157	0	2.48	3.3e-05	0.001082	1	2.09	0.000561	0.012405	1	1.72	0.009574	0.092134	0	1.6	0.022759	0.138377	0	1.03	0.87032	0.948906	0	1.67	0.013368	0.099743	0	5
7	FBgn0053468	CG33468	CG33468	-1.37	0.187185	0.999395	0	1.14	0.57919	0.985816	0	1.24	0.323184	0.75444	0	1.42	0.109264	0.54613	0	1.5	0.062283	0.41771	0	2.23	0.000436	0.009291	1	2.18	0.001639	0.029108	1	1.41	0.147693	0.470762	0	-1.02	0.942398	0.978423	0	1.66	0.021212	0.116729	0	1.71	0.015039	0.108973	0	7
7	FBgn0033130	Tetraspanin 42Ei	Tsp42Ei	1.04	0.767704	0.999395	0	1.04	0.756659	0.989815	0	1.1	0.502057	0.851481	0	1.29	0.073049	0.45566	0	1.21	0.178156	0.684753	0	1.75	0.000173	0.004377	1	1.73	0.000222	0.005838	1	1.49	0.005948	0.065263	0	1.29	0.073658	0.279917	0	1.36	0.031562	0.150482	0	1.49	0.005758	0.053299	0	7
7	FBgn0039075	CG4393	CG4393	-1.38	0.294766	0.999395	0	-1.05	0.815684	0.994329	0	1.27	0.215513	0.663019	0	1.1	0.620805	0.930127	0	1.33	0.114102	0.567184	0	1.8	0.001616	0.026416	1	1.75	0.002568	0.040375	1	1.45	0.040237	0.232902	0	1.04	0.857857	0.948269	0	-1.03	0.860552	0.943678	0	1.48	0.049281	0.249208	0	7
7	FBgn0011695	Ejaculatory bulb protein III	PebIII	1.37	0.08387	0.999395	0	1.47	0.033196	0.664013	0	1.33	0.11052	0.528221	0	1.36	0.086944	0.495398	0	1.55	0.017412	0.192337	0	2.04	0.000179	0.00451	1	1.89	0.000689	0.014676	1	1.63	0.007679	0.078531	0	1.24	0.233876	0.524461	0	1.09	0.638634	0.829898	0	1.46	0.03681	0.205895	0	7
7	FBgn0032435	Organic anion transporting polypeptide 33Eb	Oatp33Eb	-1.06	0.529567	0.999395	0	1.12	0.210433	0.957756	0	1.18	0.072566	0.455095	0	1.3	0.006453	0.111174	0	1.39	0.000694	0.01771	0	1.59	5e-06	0.000212	1	1.68	0	3.3e-05	1	1.39	0.00065	0.012022	0	1.49	6.3e-05	0.001471	0	1.39	0.00074	0.009952	0	1.41	0.000449	0.007016	0	7
7	FBgn0020416	Imaginal disc growth factor 1	Idgf1	-1.05	0.740221	0.999395	0	1.04	0.795277	0.99325	0	1.15	0.321353	0.752975	0	1.12	0.422376	0.85365	0	1.08	0.575613	0.935166	0	1.67	0.000353	0.007833	1	1.53	0.002584	0.040588	1	1.46	0.012675	0.111743	0	1.11	0.440881	0.712313	0	1.06	0.678929	0.853406	0	1.4	0.01504	0.108973	0	7
7	FBgn0003888	beta-Tubulin at 60D	betaTub60D	1.36	0.003944	0.670117	0	1.2	0.07725	0.874848	0	1.15	0.182821	0.625638	0	1.22	0.053012	0.384826	0	1.28	0.020581	0.21172	0	1.62	1.5e-05	0.000559	1	1.64	1.1e-05	0.000447	1	1.3	0.014277	0.121472	0	1.17	0.140919	0.399824	0	-1.02	0.857935	0.942073	0	1.39	0.00199	0.024127	0	7
7	FBgn0033875	CG6357	CG6357	1.04	0.699089	0.999395	0	-1.04	0.729912	0.988753	0	1.09	0.38097	0.787617	0	1.1	0.359114	0.820099	0	1.01	0.920525	0.991117	0	1.72	1e-06	6.4e-05	1	1.71	1e-06	6.9e-05	1	1.36	0.003127	0.04022	0	1.21	0.061179	0.252608	0	1.15	0.153514	0.39653	0	1.39	0.001786	0.021978	0	7
7	FBgn0020415	Imaginal disc growth factor 2	Idgf2	1.21	0.022047	0.957371	0	1.06	0.443181	0.974172	0	1.03	0.68199	0.917768	0	1.1	0.227904	0.715603	0	1.17	0.053118	0.381762	0	1.79	0	0	1	1.61	0	1.4e-05	1	1.46	1.8e-05	0.000588	0	1.2	0.026546	0.152588	0	1.25	0.007962	0.060148	0	1.38	0.000203	0.003712	0	7
7	FBgn0031579	CG15422	CG15422	1.01	0.957698	0.999703	0	1.27	0.116701	0.921897	0	1.36	0.04222	0.354394	0	1.18	0.277608	0.7604	0	1.33	0.061482	0.415145	0	1.79	0.000248	0.005884	1	1.59	0.002841	0.043525	1	1.43	0.019466	0.146892	0	1.22	0.186045	0.463525	0	1.07	0.673644	0.850686	0	1.37	0.039392	0.214931	0	7
7	FBgn0033786	CG3884	CG3884	1.07	0.495995	0.999395	0	1.11	0.291714	0.968665	0	1.1	0.309728	0.742432	0	1.28	0.014481	0.184872	0	1.38	0.001616	0.034657	0	1.72	1e-06	3.9e-05	1	1.57	1.9e-05	0.000748	1	1.44	0.000368	0.007488	0	1.35	0.002727	0.032444	0	1.32	0.005717	0.047868	0	1.34	0.003798	0.038727	0	7
7	FBgn0051769	CG31769	CG31769	-1	0.986375	0.999703	0	1.07	0.657439	0.988335	0	1.17	0.274943	0.71973	0	1.24	0.132521	0.593828	0	1.12	0.434726	0.89383	0	1.74	0.000272	0.006373	1	1.6	0.001711	0.030038	1	1.43	0.014724	0.123466	0	1.09	0.552266	0.789681	0	-1.07	0.627847	0.822527	0	1.29	0.080207	0.331521	0	7
7	FBgn0038292	CG3987	CG3987	1.12	0.26537	0.999395	0	1.28	0.019506	0.572107	0	1.43	0.000883	0.034442	0	1.25	0.031789	0.294063	0	1.24	0.04018	0.324226	0	1.72	2e-06	9.9e-05	1	1.76	1e-06	4.7e-05	1	1.46	0.000491	0.009599	0	1.37	0.003127	0.035868	0	1.19	0.095894	0.299411	0	1.28	0.018622	0.127558	0	7
7	FBgn0010246	Myosin 61F	Myo61F	1.15	0.199401	0.999395	0	1.1	0.358881	0.971784	0	1.08	0.447455	0.825996	0	1.18	0.120268	0.570612	0	1.19	0.102689	0.542542	0	1.71	5e-06	0.000209	1	1.61	3.3e-05	0.001189	1	1.36	0.005118	0.057673	0	1.2	0.087651	0.308727	0	1.04	0.716945	0.874163	0	1.23	0.054432	0.264069	0	7
7	FBgn0028533	CG7953	CG7953	-1.02	0.922587	0.999703	0	1.03	0.832506	0.995228	0	1.03	0.859246	0.973101	0	1.04	0.816376	0.972832	0	1.21	0.227246	0.751087	0	1.73	0.000959	0.017505	1	1.7	0.001234	0.023504	1	1.36	0.056483	0.28582	0	1.11	0.524973	0.772184	0	-1.15	0.363546	0.628982	0	1.22	0.207486	0.553788	0	7
7	FBgn0033139	Tetraspanin 42Er	Tsp42Er	-1.05	0.682942	0.999395	0	1.08	0.478688	0.979862	0	1.14	0.238299	0.685552	0	1.2	0.098729	0.526487	0	1.05	0.67494	0.959831	0	1.68	1.1e-05	0.000417	1	1.57	0.000101	0.003082	1	1.29	0.020026	0.14974	0	1.17	0.149003	0.409671	0	-1.01	0.898922	0.960443	0	1.21	0.088376	0.350861	0	7
7	FBgn0037228	CG1092	CG1092	1.03	0.87745	0.999395	0	-1.07	0.641817	0.988335	0	-1.32	0.069092	0.447394	0	1.2	0.272277	0.757109	0	1.03	0.865244	0.986182	0	1.9	8.3e-05	0.0024	1	1.8	0.000269	0.006809	1	1.28	0.104615	0.396531	0	1.2	0.236687	0.527778	0	-1.05	0.743965	0.887828	0	1.18	0.280401	0.632984	0	7
7	FBgn0039102	Spatzle-Processing Enzyme	SPE	1.26	0.067577	0.999395	0	1.06	0.620592	0.988335	0	1.28	0.051989	0.394799	0	1.28	0.076285	0.466719	0	1.16	0.231752	0.75724	0	1.73	5.3e-05	0.001614	1	1.62	0.000303	0.007547	1	1.47	0.00318	0.040665	0	1.01	0.935334	0.977342	0	-1.14	0.308521	0.578037	0	1.18	0.196264	0.539561	0	7
7	FBgn0037065	CG12974	CG12974	1.08	0.486527	0.999395	0	1.04	0.725776	0.988753	0	1.09	0.438769	0.820949	0	1.11	0.372028	0.827308	0	1.07	0.555786	0.92869	0	1.55	0.000231	0.00557	1	1.54	0.000307	0.007609	1	1.41	0.007331	0.075937	0	1.25	0.049985	0.225971	0	-1.06	0.594043	0.802291	0	1.17	0.166882	0.496191	0	7
2	FBgn0035281	Cuticular protein 62Bc	Cpr62Bc	-1.16	0.304197	0.999395	0	-1.12	0.439922	0.974172	0	-1.79	0.000157	0.009899	1	-1.01	0.942359	0.994163	0	-1.7	0.001371	0.030321	1	-1.4	0.03512	0.242844	0	-1.8	0.000145	0.004161	1	-1.45	0.012533	0.110791	0	-1.29	0.078995	0.292252	0	-1.26	0.110369	0.324708	0	-1.38	0.046831	0.240597	0	2
2	FBgn0001991	Ca[2+]-channel protein alpha[[1]] subunit D	Ca-alpha1D	-1.11	0.216257	0.999395	0	-1.31	0.002075	0.193491	0	-1.58	1e-06	0.000248	1	-1.09	0.291015	0.771194	0	-1.3	0.003003	0.056094	0	-1.39	0.000254	0.006003	0	-1.51	8e-06	0.000356	1	-1.4	0.000173	0.004026	0	-1.26	0.008074	0.071618	0	-1.25	0.008822	0.065109	0	-1.19	0.046066	0.238106	0	2
2	FBgn0033827	CG17047	CG17047	1.08	0.504929	0.999395	0	-1.21	0.083209	0.895664	0	-1.57	0.000146	0.009434	1	1.03	0.809668	0.972472	0	-1.26	0.041553	0.330435	0	-1.18	0.135673	0.520304	0	-1.57	0.000121	0.003571	1	-1.22	0.074251	0.334486	0	-1.14	0.234433	0.52492	0	-1.14	0.224532	0.488817	0	-1.37	0.00556	0.051835	0	2
7	FBgn0015773	Netrin-A	NetA	1.24	0.106606	0.999395	0	1.11	0.415509	0.97412	0	1.55	0.001293	0.045433	1	1.31	0.043307	0.34712	0	1.28	0.062051	0.416872	0	1.44	0.006575	0.074827	0	1.6	0.001716	0.030038	1	1.31	0.04361	0.24519	0	1.34	0.027509	0.156223	0	1.12	0.375751	0.639918	0	1.49	0.00315	0.034138	0	7
1	FBgn0035737	Cuticular protein 65Ec	Cpr65Ec	-1.52	0.069847	0.999395	0	-1.07	0.746347	0.989815	0	-2.06	0.018587	0.234024	0	-1.86	0.004914	0.094437	0	1.07	0.859195	0.986027	0	-2.97	0.042122	0.269832	0	-3.15	0.000459	0.010708	1	-3.04	0.006004	0.065759	0	-2.09	0.043321	0.207376	0	-1.71	0.159555	0.404816	0	-2.03	0.009677	0.078327	0	1
2	FBgn0035888	CG7120	CG7120	1.02	0.923119	0.999703	0	1.05	0.671072	0.988335	0	-1.18	0.199909	0.646271	0	-1.09	0.511915	0.896291	0	-1.21	0.134323	0.60827	0	-1.06	0.64664	0.908019	0	-1.52	0.001539	0.027634	1	-1.28	0.054496	0.279542	0	1.05	0.721647	0.884132	0	-1.16	0.253345	0.520427	0	-1.19	0.161017	0.488708	0	2
2	FBgn0033922			-1.08	0.519905	0.999395	0	-1.26	0.050607	0.769463	0	-1.34	0.013602	0.198736	0	-1.15	0.23519	0.722382	0	-1.33	0.016231	0.183924	0	-1.24	0.060284	0.336614	0	-1.61	0.000102	0.003104	1	-1.49	0.000947	0.016146	0	-1.5	0.00075	0.011792	0	-1.25	0.052818	0.208722	0	-1.31	0.02143	0.141204	0	2
2	FBgn0038942	CG13862	CG13862	-1.19	0.026431	0.964922	0	-1.05	0.526289	0.982902	0	-1.25	0.005452	0.113222	0	-1.17	0.040651	0.337775	0	-1.37	0.000129	0.004466	0	-1.27	0.002363	0.03525	0	-1.54	1e-06	3.4e-05	1	-1.44	1.1e-05	0.000395	0	-1.45	9e-06	0.000297	0	-1.48	3e-06	9.9e-05	0	-1.32	0.000672	0.009842	0	2
2	FBgn0036470	CG13463	CG13463	-1.06	0.440198	0.999395	0	-1.12	0.113646	0.921613	0	-1.28	0.000907	0.034974	0	-1.17	0.029494	0.27954	0	-1.3	0.000386	0.010858	0	-1.34	0.000309	0.007065	0	-1.52	1e-06	6.6e-05	1	-1.45	2e-06	0.000105	0	-1.38	2.5e-05	0.000698	0	-1.3	0.000358	0.005557	0	-1.34	0.000103	0.002161	0	2
2	FBgn0035505	tipE homolog 2	Teh2	-1.14	0.124744	0.999395	0	-1.36	0.000609	0.093359	0	-1.23	0.028802	0.298665	0	-1.39	0.000224	0.009357	0	-1.18	0.054902	0.38884	0	-1.19	0.043314	0.274787	0	-1.58	1e-06	6.4e-05	1	-1.44	5.4e-05	0.001538	0	-1.45	4.4e-05	0.001105	0	-1.16	0.086172	0.280878	0	-1.36	0.000576	0.008659	0	2
2	FBgn0040949	CG13998	CG13998	-1.07	0.413747	0.999395	0	1	0.96777	0.99777	0	-1.27	0.009151	0.159332	0	-1.06	0.537494	0.906629	0	-1.23	0.019564	0.206229	0	-1.39	0.000431	0.009242	0	-1.56	2.2e-05	0.000844	1	-1.49	2.9e-05	0.000911	0	-1.3	0.004406	0.046301	0	-1.23	0.021494	0.117673	0	-1.39	0.000453	0.00707	0	2
2	FBgn0031675	CG9121	CG9121	1.13	0.298844	0.999395	0	-1.53	0.000902	0.115173	0	-1.05	0.703073	0.924929	0	1.11	0.390556	0.835892	0	-1.17	0.195227	0.710874	0	-1.21	0.1221	0.493999	0	-1.51	0.001097	0.021561	1	-1.33	0.020834	0.153572	0	-1.38	0.009876	0.080537	0	-1.45	0.003366	0.032395	0	-1.41	0.006326	0.056992	0	2
2	FBgn0052451	Secretory Pathway Calcium atpase	SPoCk	-1.02	0.855912	0.999395	0	-1.21	0.111406	0.921613	0	-1.13	0.305669	0.739755	0	-1.19	0.148152	0.620408	0	-1.3	0.030972	0.274712	0	-1.46	0.002239	0.033798	0	-1.51	0.000849	0.017462	1	-1.4	0.006338	0.068682	0	-1.43	0.003676	0.040713	0	-1.41	0.005019	0.04329	0	-1.44	0.003123	0.033991	0	2
2	FBgn0035808			-1.41	0.051788	0.999395	0	-1.5	0.024393	0.602032	0	-1.73	0.002697	0.074637	0	-1.59	0.018291	0.213154	0	-1.29	0.146042	0.629258	0	-1.39	0.064788	0.351719	0	-1.8	0.003094	0.046377	1	-1.32	0.113644	0.412478	0	-1.45	0.036536	0.1869	0	-1.24	0.217806	0.481101	0	-1.49	0.0253	0.158969	0	2
2	FBgn0030576	CG15890	CG15890	-1.28	0.065849	0.999395	0	-1.24	0.100207	0.912799	0	-1.5	0.015298	0.210785	0	-1.29	0.262217	0.749139	0	-1.56	0.008961	0.124122	0	-1.49	0.036619	0.249405	0	-1.64	0.001277	0.02411	1	-1.75	0.004402	0.051617	0	-1.39	0.026227	0.151454	0	-1.34	0.04816	0.197156	0	-1.54	0.009752	0.078644	0	2
4	FBgn0053769	CG33769	CG33769	1.17	0.282745	0.999395	0	-1.14	0.358707	0.971784	0	-1.52	0.010567	0.172521	0	1.13	0.411402	0.845714	0	1.15	0.336865	0.851986	0	1.08	0.60935	0.893763	0	1.63	0.001329	0.024772	1	-1.1	0.59939	0.849948	0	1.29	0.085492	0.30538	0	1.25	0.128796	0.356501	0	1.17	0.296127	0.649052	0	4
4	FBgn0050281	CG30281	CG30281	-1.13	0.397942	0.999395	0	-1.29	0.081124	0.890133	0	1.01	0.925427	0.986316	0	1.1	0.505424	0.894199	0	-1.13	0.388164	0.875051	0	1.36	0.036779	0.249565	0	1.57	0.002874	0.043932	1	1.29	0.08316	0.35411	0	1.04	0.799848	0.923636	0	-1.03	0.841073	0.933776	0	1.13	0.399272	0.741735	0	4
4	FBgn0034662	CG13492	CG13492	-1.02	0.855969	0.999395	0	-1.02	0.887899	0.997504	0	1.09	0.523356	0.860154	0	-1.18	0.227854	0.715603	0	1.01	0.969767	0.995039	0	1.44	0.008881	0.094068	0	1.58	0.001254	0.023788	1	1.39	0.018458	0.142118	0	1.42	0.012263	0.092325	0	-1.1	0.475232	0.719199	0	1.13	0.385494	0.731741	0	4
4	FBgn0050267	CG30267	CG30267	1.07	0.706661	0.999395	0	1.66	0.009108	0.388714	0	1.18	0.597879	0.890219	0	-1.28	0.24633	0.734742	0	1.06	0.83659	0.984857	0	1.43	0.058231	0.329793	0	2.09	0.000993	0.019843	1	1.25	0.439918	0.763847	0	-1.38	0.124328	0.373979	0	1.04	0.795327	0.913143	0	1.1	0.739002	0.914926	0	4
4	FBgn0034551	CG15225	CG15225	1.19	0.263472	0.999395	0	1.11	0.486475	0.979862	0	1.11	0.485908	0.845487	0	-1.11	0.514255	0.897131	0	1.08	0.602571	0.942697	0	-1.14	0.391561	0.802255	0	1.69	0.001205	0.023021	1	1.4	0.031275	0.199173	0	1.23	0.223771	0.512274	0	1.09	0.559144	0.78083	0	1.08	0.61185	0.859729	0	4
4	FBgn0000577	engrailed	en	-1.13	0.47911	0.999395	0	-1.24	0.474674	0.979338	0	-1.05	0.789623	0.950512	0	1.18	0.169086	0.647991	0	1.09	0.61717	0.946277	0	-1.01	0.979472	0.995523	0	-1.53	0.002777	0.042837	1	-1.11	0.553951	0.827182	0	-1.31	0.124237	0.373877	0	1.26	0.177871	0.428397	0	1.01	0.95076	0.98674	0	4
4	FBgn0052389			1.05	0.611359	0.999395	0	-1.33	0.008345	0.380084	0	1.11	0.316198	0.747691	0	1.03	0.771282	0.96663	0	-1.12	0.281391	0.814508	0	1.06	0.598969	0.891646	0	1.51	0.000222	0.005838	1	-1.02	0.852472	0.956973	0	1.37	0.007843	0.070421	0	1.3	0.013028	0.085116	0	1.01	0.936319	0.981805	0	4
4	FBgn0028412	Mst33A	Mst33A	1.26	0.054668	0.999395	0	1.44	0.030006	0.642182	0	-1.15	0.237727	0.684689	0	-1.28	0.087495	0.4966	0	-1.01	0.91609	0.991117	0	-1.03	0.816855	0.95695	0	1.6	0.000565	0.012456	1	-1.08	0.556296	0.828412	0	1.22	0.095044	0.322166	0	1.09	0.47851	0.721808	0	-1.12	0.319454	0.67388	0	4
4	FBgn0031082	CG17003	CG17003	1.28	0.155583	0.999395	0	1.37	0.424146	0.97412	0	-1.32	0.114535	0.536932	0	1.22	0.293349	0.773774	0	1.02	0.90893	0.990358	0	-1.06	0.829481	0.961057	0	2.06	0.002275	0.036963	1	-1.38	0.152914	0.479022	0	-1.03	0.866739	0.952058	0	1.04	0.809109	0.918052	0	-1.29	0.143915	0.4631	0	4
7	FBgn0035929	CG13311	CG13311	1.14	0.41618	0.999395	0	1.2	0.264594	0.964139	0	1.53	0.011698	0.182189	0	1.24	0.195333	0.674988	0	1.18	0.313371	0.835512	0	1.63	0.004241	0.054504	0	1.76	0.001135	0.022176	1	1.53	0.012547	0.110839	0	1.31	0.106073	0.343346	0	1.17	0.386716	0.650132	0	1.46	0.02402	0.153318	0	7
7	FBgn0034507	CG11192	CG11192	-1.37	0.067759	0.999395	0	1.28	0.154453	0.947216	0	1.34	0.093781	0.499698	0	1.1	0.588958	0.921464	0	1.42	0.043839	0.343163	0	1.64	0.004977	0.061371	0	1.68	0.003396	0.049984	1	1.48	0.024968	0.171657	0	1.25	0.193293	0.473934	0	1.13	0.468634	0.714644	0	1.45	0.033654	0.19435	0	7
7	FBgn0030592	CG9514	CG9514	1.21	0.070981	0.999395	0	1	0.965373	0.99777	0	1.25	0.035226	0.328636	0	1.27	0.024145	0.250543	0	1.35	0.005816	0.091455	0	1.26	0.030549	0.224052	0	1.74	2e-06	9.9e-05	1	1.48	0.00041	0.008254	0	1.28	0.020761	0.130639	0	1.31	0.01357	0.087441	0	1.44	0.001034	0.01417	0	7
[truncated: 235 more rows]

## Sheet: Supplemental Table 2
Symbol	FBGN	minFDR	extreme fold)	Qualifying Time points	Annotation	D79 FDR	D79 fold	D72 FDR	D72 fold	D65 FDR	D65 fold	D58 FDR	D58 fold	D51 FDR	D51 fold	D44 FDR	D44 fold	D37 FDR	D37 fold	D30 FDR	D30 fold	D23 FDR	D23 fold	D16 FDR	D16 fold	D9 FDR	D9 fold
[truncated: 263 more rows]

[truncated: 1 more sheets: Supplemental Table 3]
